# Supplementary material
Source: publisher figshare collection journal article supplement (https://acs.figshare.com/ndownloader/files/3965920)
Supplement: Supplementary file 1 [file 3965920]

data_global
_audit_creation_method                  'APEX2 v2013.6-2'

_publ_requested_journal                 ?

_publ_contact_author_name               ?
_publ_contact_author_address            
;
;
_publ_contact_author_email              ?
_publ_contact_author_fax                ?
_publ_contact_author_phone              ?

_publ_section_title                     
;
;
_publ_section_abstract                  
;
;
_publ_section_references                
;
;
_publ_section_comment                   
;
;

data_I
_chemical_name_systematic               ?
_chemical_name_common                   ?
_chemical_formula_moiety                ?
_chemical_formula_sum                   'C24 H27 Cl N2 O3'
_chemical_formula_iupac                 ?
_chemical_formula_weight                426.92

_chemical_melting_point                 ?

_space_group_crystal_system             triclinic
_space_group_name_H-M_alt               'P -1'
_space_group_name_Hall                  '-P 1'
loop_
    _space_group_symop_operation_xyz
    'x, y, z'
    '-x, -y, -z'

_cell_length_a                          8.7207(5)
_cell_length_b                          11.0415(6)
_cell_length_c                          12.0957(8)
_cell_angle_alpha                       76.6178(19)
_cell_angle_beta                        77.387(2)
_cell_angle_gamma                       85.038(2)
_cell_volume                            1104.93(11)
_cell_formula_units_Z                   2
_cell_measurement_reflns_used           5231
_cell_measurement_theta_min             2.2934
_cell_measurement_theta_max             22.8772
_cell_measurement_temperature           296.(2)

_exptl_crystal_description              block
_exptl_crystal_colour                   colourless
_exptl_crystal_size_max                 0.380
_exptl_crystal_size_mid                 0.200
_exptl_crystal_size_min                 0.200
_exptl_crystal_density_diffrn           1.283
_exptl_crystal_density_meas             ?
_exptl_crystal_density_method           'not measured'
_exptl_crystal_F_000                    452

_exptl_absorpt_coefficient_mu           0.200
_exptl_absorpt_correction_type          multi-scan
_exptl_absorpt_process_details          'SADABS V2012/1 (Bruker AXS Inc.)'
_exptl_absorpt_correction_T_min         0.89
_exptl_absorpt_correction_T_max         0.96

_exptl_special_details                  
;
; 

_diffrn_ambient_temperature             296.(2)

_diffrn_source                          ?
_diffrn_source_type                     ?

_diffrn_radiation_type                  MoK\a
_diffrn_radiation_wavelength            0.71073

_diffrn_radiation_monochromator         'graphite'

_diffrn_measurement_device_type         'Bruker APEX-II CCD'
_diffrn_measurement_method              '\f and \w scans'

_diffrn_detector_area_resol_mean        8.3333

_diffrn_reflns_number                   22795
_diffrn_reflns_av_R_equivalents         0.0430
_diffrn_reflns_av_sigmaI/netI           ?
_diffrn_reflns_theta_min                1.77
_diffrn_reflns_theta_max                26.79
_diffrn_reflns_theta_full               26.79
_diffrn_measured_fraction_theta_max     0.998
_diffrn_measured_fraction_theta_full    0.998
_diffrn_reflns_limit_h_min              -11
_diffrn_reflns_limit_h_max              11
_diffrn_reflns_limit_k_min              -14
_diffrn_reflns_limit_k_max              13
_diffrn_reflns_limit_l_min              -15
_diffrn_reflns_limit_l_max              15

_refine_special_details                 
;
;

_reflns_number_total                    4698
_reflns_number_gt                       3353
_reflns_threshold_expression            'I > 2\s(I)'

_refine_ls_structure_factor_coef        Fsqd
_refine_ls_matrix_type                  full
_refine_ls_R_factor_all                 0.0743
_refine_ls_R_factor_gt                  0.0455
_refine_ls_wR_factor_gt                 0.1257
_refine_ls_wR_factor_ref                0.1610
_refine_ls_goodness_of_fit_ref          1.102
_refine_ls_restrained_S_all             1.102
_refine_ls_number_reflns                4698
_refine_ls_number_parameters            274
_refine_ls_number_restraints            0
_refine_ls_hydrogen_treatment           constr
_refine_ls_weighting_scheme             calc
_refine_ls_weighting_details            
    'w=1/[\s^2^(Fo^2^)+(0.0836P)^2^+0.1835P] where P=(Fo^2^+2Fc^2^)/3'

_atom_sites_solution_hydrogens          geom
_atom_sites_solution_primary            ?
_atom_sites_solution_secondary          ?

_refine_ls_shift/su_max                 0.001
_refine_ls_shift/su_mean                0.000
_refine_diff_density_max                0.324
_refine_diff_density_min                -0.382
_refine_ls_extinction_method            none
_refine_ls_extinction_coef              ?

loop_
    _atom_type_symbol
    _atom_type_description
    _atom_type_scat_dispersion_real
    _atom_type_scat_dispersion_imag
    _atom_type_scat_source
    C C 0.0033 0.0016 'International Tables Vol C Tables 4.2.6.8 and 6.1.1.4'
    H H 0.0000 0.0000 'International Tables Vol C Tables 4.2.6.8 and 6.1.1.4'
    N N 0.0061 0.0033 'International Tables Vol C Tables 4.2.6.8 and 6.1.1.4'
    O O 0.0106 0.0060 'International Tables Vol C Tables 4.2.6.8 and 6.1.1.4'
    Cl Cl 0.1484 0.1585
     'International Tables Vol C Tables 4.2.6.8 and 6.1.1.4'

_computing_data_collection              'Bruker APEX2'
_computing_cell_refinement              'SAINT V8.32B (Bruker AXS Inc., 2013)'
_computing_data_reduction               'SAINT V8.32B (Bruker AXS Inc., 2013)'
_computing_structure_solution           'SHELXS-97 (Sheldrick 2008)'
_computing_structure_refinement         'SHELXL-2013 (Sheldrick, 2013)'
_computing_molecular_graphics           'Bruker SHELXTL'
_computing_publication_material         'Bruker SHELXTL'

loop_
    _atom_site_type_symbol
    _atom_site_label
    _atom_site_fract_x
    _atom_site_fract_y
    _atom_site_fract_z
    _atom_site_U_iso_or_equiv
    _atom_site_adp_type
    _atom_site_calc_flag
    _atom_site_refinement_flags_adp
    _atom_site_refinement_flags_occupancy
    _atom_site_refinement_flags_posn
    _atom_site_occupancy
    _atom_site_disorder_assembly
    _atom_site_disorder_group
    C C1 0.5703(2) 0.71508(18) 0.29814(17) 0.0356(4) Uani d . . . 1 . .
    C C2 0.4854(2) 0.6035(2) 0.2948(2) 0.0464(5) Uani d . . . 1 . .
    H H2A 0.4093 0.6275 0.2452 0.056 Uiso calc U . R 1 . .
    H H2B 0.4309 0.5645 0.3722 0.056 Uiso calc U . R 1 . .
    C C3 0.6123(2) 0.51468(18) 0.24634(19) 0.0405(5) Uani d . . . 1 . .
    H H3 0.5963 0.431 0.2956 0.049 Uiso calc U . R 1 . .
    C C4 0.8154(2) 0.49979(17) 0.36736(17) 0.0348(4) Uani d . . . 1 . .
    H H4 0.7242 0.4904 0.4321 0.042 Uiso calc U . R 1 . .
    C C5 0.9207(2) 0.59816(17) 0.37867(17) 0.0379(5) Uani d . . . 1 . .
    H H5A 1.0296 0.5812 0.3446 0.045 Uiso calc U . R 1 . .
    H H5B 0.913 0.5994 0.4596 0.045 Uiso calc U . R 1 . .
    C C6 0.8588(2) 0.72538(16) 0.31152(16) 0.0301(4) Uani d . . . 1 . .
    C C7 0.6138(3) 0.5085(2) 0.1212(2) 0.0544(6) Uani d . . . 1 . .
    H H7 0.5093 0.4831 0.1201 0.065 Uiso calc U . R 1 . .
    C C8 0.6403(4) 0.6336(3) 0.0361(2) 0.0809(9) Uani d . . . 1 . .
    H H8A 0.5655 0.6948 0.0632 0.121 Uiso calc U . R 1 . .
    H H8B 0.6273 0.6262 -0.0388 0.121 Uiso calc U . R 1 . .
    H H8C 0.7449 0.6589 0.0302 0.121 Uiso calc U . R 1 . .
    C C9 0.7306(4) 0.4091(3) 0.0832(3) 0.0874(10) Uani d . . . 1 . .
    H H9A 0.717 0.3974 0.0097 0.131 Uiso calc U . R 1 . .
    H H9B 0.7133 0.3322 0.14 0.131 Uiso calc U . R 1 . .
    H H9C 0.8355 0.4346 0.0756 0.131 Uiso calc U . R 1 . .
    C C10 0.8910(2) 0.37317(17) 0.35966(17) 0.0370(5) Uani d . . . 1 . .
    C C11 1.0214(3) 0.3596(2) 0.2742(2) 0.0526(6) Uani d . . . 1 . .
    H H11 1.0671 0.4299 0.2232 0.063 Uiso calc U . R 1 . .
    C C12 1.0844(3) 0.2424(2) 0.2638(2) 0.0625(7) Uani d . . . 1 . .
    H H12 1.1719 0.2343 0.2059 0.075 Uiso calc U . R 1 . .
    C C13 1.0183(3) 0.1382(2) 0.3385(3) 0.0626(7) Uani d . . . 1 . .
    H H13 1.0613 0.0596 0.3316 0.075 Uiso calc U . R 1 . .
    C C14 0.8893(3) 0.1499(2) 0.4232(2) 0.0567(6) Uani d . . . 1 . .
    H H14 0.8443 0.0791 0.4737 0.068 Uiso calc U . R 1 . .
    C C15 0.8254(3) 0.26705(18) 0.43401(19) 0.0438(5) Uani d . . . 1 . .
    H H15 0.7375 0.2743 0.4919 0.053 Uiso calc U . R 1 . .
    C C16 0.8074(2) 0.82195(17) 0.38645(17) 0.0356(4) Uani d . . . 1 . .
    H H16A 0.9001 0.8447 0.4079 0.043 Uiso calc U . R 1 . .
    H H16B 0.7682 0.8961 0.3385 0.043 Uiso calc U . R 1 . .
    C C17 0.6848(2) 0.78622(19) 0.49555(17) 0.0389(5) Uani d . . . 1 . .
    C C18 0.5268(3) 0.8709(2) 0.6468(2) 0.0605(7) Uani d . . . 1 . .
    H H18A 0.431 0.8425 0.6363 0.091 Uiso calc U . R 1 . .
    H H18B 0.5062 0.9489 0.6705 0.091 Uiso calc U . R 1 . .
    H H18C 0.5671 0.8104 0.7055 0.091 Uiso calc U . R 1 . .
    C C19 0.9859(2) 0.78304(16) 0.20786(16) 0.0304(4) Uani d . . . 1 . .
    C C20 1.1286(2) 0.81346(19) 0.22575(18) 0.0401(5) Uani d . . . 1 . .
    H H20 1.147 0.7969 0.3008 0.048 Uiso calc U . R 1 . .
    C C21 1.2441(2) 0.8682(2) 0.1334(2) 0.0454(5) Uani d . . . 1 . .
    H H21 1.3386 0.8894 0.1464 0.055 Uiso calc U . R 1 . .
    C C22 1.2170(2) 0.89058(19) 0.02311(18) 0.0432(5) Uani d . . . 1 . .
    C C23 1.0778(3) 0.8609(2) 0.00282(19) 0.0486(5) Uani d . . . 1 . .
    H H23 1.0608 0.8763 -0.0726 0.058 Uiso calc U . R 1 . .
    C C24 0.9626(2) 0.80775(19) 0.09558(17) 0.0405(5) Uani d . . . 1 . .
    H H24 0.8678 0.7883 0.0819 0.049 Uiso calc U . R 1 . .
    Cl Cl1 1.35902(8) 0.96035(7) -0.09386(6) 0.0739(3) Uani d . . . 1 . .
    N N1 0.72758(17) 0.68671(13) 0.27121(13) 0.0304(4) Uani d . . . 1 . .
    N N2 0.76278(18) 0.55996(13) 0.25797(13) 0.0318(4) Uani d . . . 1 . .
    O O1 0.51061(17) 0.81428(13) 0.31740(14) 0.0473(4) Uani d . . . 1 . .
    O O2 0.6353(2) 0.68447(14) 0.54003(14) 0.0548(4) Uani d . . . 1 . .
    O O3 0.64043(18) 0.88696(13) 0.53948(13) 0.0496(4) Uani d . . . 1 . .

loop_
    _atom_site_aniso_label
    _atom_site_aniso_U_11
    _atom_site_aniso_U_22
    _atom_site_aniso_U_33
    _atom_site_aniso_U_12
    _atom_site_aniso_U_13
    _atom_site_aniso_U_23
    C1 0.0335(10) 0.0346(10) 0.0366(10) -0.0022(8) -0.0041(8) -0.0060(8)
    C2 0.0351(11) 0.0429(12) 0.0598(14) -0.0069(9) -0.0045(10) -0.0112(10)
    C3 0.0360(11) 0.0332(10) 0.0536(13) -0.0096(8) -0.0081(9) -0.0097(9)
    C4 0.0403(11) 0.0265(9) 0.0353(10) -0.0025(8) -0.0049(8) -0.0041(8)
    C5 0.0487(12) 0.0279(10) 0.0380(11) -0.0014(8) -0.0143(9) -0.0041(8)
    C6 0.0334(10) 0.0247(9) 0.0328(9) -0.0030(7) -0.0084(7) -0.0054(7)
    C7 0.0520(14) 0.0582(15) 0.0647(15) -0.0119(11) -0.0182(12) -0.0273(12)
    C8 0.110(2) 0.092(2) 0.0518(16) -0.0404(19) -0.0298(16) -0.0125(15)
    C9 0.087(2) 0.101(2) 0.094(2) 0.0044(18) -0.0193(18) -0.064(2)
    C10 0.0425(11) 0.0266(9) 0.0422(11) -0.0029(8) -0.0114(9) -0.0047(8)
    C11 0.0523(14) 0.0360(12) 0.0606(15) 0.0005(10) 0.0000(11) -0.0044(10)
    C12 0.0608(16) 0.0533(15) 0.0712(17) 0.0147(12) -0.0071(13) -0.0211(13)
    C13 0.0755(18) 0.0334(12) 0.0847(19) 0.0133(12) -0.0311(16) -0.0165(12)
    C14 0.0777(18) 0.0273(11) 0.0670(16) -0.0068(11) -0.0271(14) -0.0007(10)
    C15 0.0535(13) 0.0313(11) 0.0455(12) -0.0064(9) -0.0130(10) -0.0015(9)
    C16 0.0407(11) 0.0282(9) 0.0378(10) -0.0074(8) -0.0041(8) -0.0084(8)
    C17 0.0441(12) 0.0364(11) 0.0367(10) -0.0037(9) -0.0055(9) -0.0110(8)
    C18 0.0599(15) 0.0674(16) 0.0508(14) -0.0008(12) 0.0074(11) -0.0240(12)
    C19 0.0324(10) 0.0243(9) 0.0341(10) 0.0000(7) -0.0059(7) -0.0071(7)
    C20 0.0356(11) 0.0466(12) 0.0386(11) -0.0045(9) -0.0101(8) -0.0068(9)
    C21 0.0298(10) 0.0518(13) 0.0543(13) -0.0069(9) -0.0059(9) -0.0115(10)
    C22 0.0392(11) 0.0426(12) 0.0431(12) -0.0085(9) 0.0038(9) -0.0090(9)
    C23 0.0536(13) 0.0587(14) 0.0339(11) -0.0153(11) -0.0053(9) -0.0095(10)
    C24 0.0404(11) 0.0466(12) 0.0373(11) -0.0132(9) -0.0087(9) -0.0095(9)
    Cl1 0.0600(4) 0.0947(6) 0.0562(4) -0.0316(4) 0.0167(3) -0.0110(4)
    N1 0.0320(8) 0.0226(7) 0.0364(8) -0.0024(6) -0.0060(6) -0.0065(6)
    N2 0.0347(9) 0.0230(8) 0.0394(9) -0.0028(6) -0.0084(7) -0.0086(6)
    O1 0.0427(8) 0.0381(8) 0.0606(10) 0.0067(6) -0.0079(7) -0.0156(7)
    O2 0.0701(11) 0.0391(8) 0.0477(9) -0.0164(7) 0.0078(8) -0.0079(7)
    O3 0.0565(10) 0.0431(8) 0.0468(9) -0.0060(7) 0.0066(7) -0.0198(7)

_geom_special_details                   
;
All esds (except the esd in the dihedral angle between two l.s. planes)
are estimated using the full covariance matrix.  The cell esds are taken
into account individually in the estimation of esds in distances, angles
and torsion angles; correlations between esds in cell parameters are only
used when they are defined by crystal symmetry.  An approximate (isotropic)
treatment of cell esds is used for estimating esds involving l.s. planes.
;

loop_
    _geom_bond_atom_site_label_1
    _geom_bond_atom_site_label_2
    _geom_bond_site_symmetry_2
    _geom_bond_distance
    _geom_bond_publ_flag
    C1 O1 . 1.221(2) ?
    C1 N1 . 1.365(2) ?
    C1 C2 . 1.504(3) ?
    C2 C3 . 1.525(3) ?
    C2 H2A . 0.97 ?
    C2 H2B . 0.97 ?
    C3 N2 . 1.490(2) ?
    C3 C7 . 1.528(3) ?
    C3 H3 . 0.98 ?
    C4 N2 . 1.486(2) ?
    C4 C10 . 1.507(3) ?
    C4 C5 . 1.529(3) ?
    C4 H4 . 0.98 ?
    C5 C6 . 1.567(2) ?
    C5 H5A . 0.97 ?
    C5 H5B . 0.97 ?
    C6 N1 . 1.468(2) ?
    C6 C16 . 1.532(2) ?
    C6 C19 . 1.533(2) ?
    C7 C9 . 1.513(4) ?
    C7 C8 . 1.522(4) ?
    C7 H7 . 0.98 ?
    C8 H8A . 0.96 ?
    C8 H8B . 0.96 ?
    C8 H8C . 0.96 ?
    C9 H9A . 0.96 ?
    C9 H9B . 0.96 ?
    C9 H9C . 0.96 ?
    C10 C15 . 1.383(3) ?
    C10 C11 . 1.383(3) ?
    C11 C12 . 1.384(3) ?
    C11 H11 . 0.93 ?
    C12 C13 . 1.371(4) ?
    C12 H12 . 0.93 ?
    C13 C14 . 1.365(4) ?
    C13 H13 . 0.93 ?
    C14 C15 . 1.387(3) ?
    C14 H14 . 0.93 ?
    C15 H15 . 0.93 ?
    C16 C17 . 1.502(3) ?
    C16 H16A . 0.97 ?
    C16 H16B . 0.97 ?
    C17 O2 . 1.200(2) ?
    C17 O3 . 1.334(2) ?
    C18 O3 . 1.436(3) ?
    C18 H18A . 0.96 ?
    C18 H18B . 0.96 ?
    C18 H18C . 0.96 ?
    C19 C24 . 1.378(3) ?
    C19 C20 . 1.390(3) ?
    C20 C21 . 1.389(3) ?
    C20 H20 . 0.93 ?
    C21 C22 . 1.369(3) ?
    C21 H21 . 0.93 ?
    C22 C23 . 1.370(3) ?
    C22 Cl1 . 1.739(2) ?
    C23 C24 . 1.384(3) ?
    C23 H23 . 0.93 ?
    C24 H24 . 0.93 ?
    N1 N2 . 1.444(2) ?

loop_
    _geom_angle_atom_site_label_1
    _geom_angle_atom_site_label_2
    _geom_angle_atom_site_label_3
    _geom_angle_site_symmetry_1
    _geom_angle_site_symmetry_3
    _geom_angle
    _geom_angle_publ_flag
    O1 C1 N1 . . 126.06(18) ?
    O1 C1 C2 . . 126.74(18) ?
    N1 C1 C2 . . 107.17(16) ?
    C1 C2 C3 . . 105.66(16) ?
    C1 C2 H2A . . 110.6 ?
    C3 C2 H2A . . 110.6 ?
    C1 C2 H2B . . 110.6 ?
    C3 C2 H2B . . 110.6 ?
    H2A C2 H2B . . 108.7 ?
    N2 C3 C2 . . 104.86(15) ?
    N2 C3 C7 . . 111.88(17) ?
    C2 C3 C7 . . 113.98(19) ?
    N2 C3 H3 . . 108.6 ?
    C2 C3 H3 . . 108.6 ?
    C7 C3 H3 . . 108.6 ?
    N2 C4 C10 . . 110.44(15) ?
    N2 C4 C5 . . 101.73(14) ?
    C10 C4 C5 . . 116.86(17) ?
    N2 C4 H4 . . 109.1 ?
    C10 C4 H4 . . 109.1 ?
    C5 C4 H4 . . 109.1 ?
    C4 C5 C6 . . 105.52(15) ?
    C4 C5 H5A . . 110.6 ?
    C6 C5 H5A . . 110.6 ?
    C4 C5 H5B . . 110.6 ?
    C6 C5 H5B . . 110.6 ?
    H5A C5 H5B . . 108.8 ?
    N1 C6 C16 . . 112.53(15) ?
    N1 C6 C19 . . 110.42(14) ?
    C16 C6 C19 . . 107.61(14) ?
    N1 C6 C5 . . 101.97(14) ?
    C16 C6 C5 . . 113.74(15) ?
    C19 C6 C5 . . 110.54(15) ?
    C9 C7 C8 . . 111.5(3) ?
    C9 C7 C3 . . 111.1(2) ?
    C8 C7 C3 . . 113.30(19) ?
    C9 C7 H7 . . 106.8 ?
    C8 C7 H7 . . 106.8 ?
    C3 C7 H7 . . 106.8 ?
    C7 C8 H8A . . 109.5 ?
    C7 C8 H8B . . 109.5 ?
    H8A C8 H8B . . 109.5 ?
    C7 C8 H8C . . 109.5 ?
    H8A C8 H8C . . 109.5 ?
    H8B C8 H8C . . 109.5 ?
    C7 C9 H9A . . 109.5 ?
    C7 C9 H9B . . 109.5 ?
    H9A C9 H9B . . 109.5 ?
    C7 C9 H9C . . 109.5 ?
    H9A C9 H9C . . 109.5 ?
    H9B C9 H9C . . 109.5 ?
    C15 C10 C11 . . 118.47(19) ?
    C15 C10 C4 . . 120.39(19) ?
    C11 C10 C4 . . 121.03(18) ?
    C10 C11 C12 . . 120.5(2) ?
    C10 C11 H11 . . 119.7 ?
    C12 C11 H11 . . 119.7 ?
    C13 C12 C11 . . 120.3(2) ?
    C13 C12 H12 . . 119.9 ?
    C11 C12 H12 . . 119.9 ?
    C14 C13 C12 . . 120.0(2) ?
    C14 C13 H13 . . 120.0 ?
    C12 C13 H13 . . 120.0 ?
    C13 C14 C15 . . 120.1(2) ?
    C13 C14 H14 . . 119.9 ?
    C15 C14 H14 . . 119.9 ?
    C10 C15 C14 . . 120.7(2) ?
    C10 C15 H15 . . 119.7 ?
    C14 C15 H15 . . 119.7 ?
    C17 C16 C6 . . 117.82(15) ?
    C17 C16 H16A . . 107.9 ?
    C6 C16 H16A . . 107.9 ?
    C17 C16 H16B . . 107.9 ?
    C6 C16 H16B . . 107.9 ?
    H16A C16 H16B . . 107.2 ?
    O2 C17 O3 . . 124.03(19) ?
    O2 C17 C16 . . 127.24(18) ?
    O3 C17 C16 . . 108.70(16) ?
    O3 C18 H18A . . 109.5 ?
    O3 C18 H18B . . 109.5 ?
    H18A C18 H18B . . 109.5 ?
    O3 C18 H18C . . 109.5 ?
    H18A C18 H18C . . 109.5 ?
    H18B C18 H18C . . 109.5 ?
    C24 C19 C20 . . 118.08(17) ?
    C24 C19 C6 . . 121.83(17) ?
    C20 C19 C6 . . 120.08(16) ?
    C21 C20 C19 . . 121.11(19) ?
    C21 C20 H20 . . 119.4 ?
    C19 C20 H20 . . 119.4 ?
    C22 C21 C20 . . 119.06(19) ?
    C22 C21 H21 . . 120.5 ?
    C20 C21 H21 . . 120.5 ?
    C21 C22 C23 . . 121.09(19) ?
    C21 C22 Cl1 . . 119.97(17) ?
    C23 C22 Cl1 . . 118.93(17) ?
    C22 C23 C24 . . 119.4(2) ?
    C22 C23 H23 . . 120.3 ?
    C24 C23 H23 . . 120.3 ?
    C19 C24 C23 . . 121.26(19) ?
    C19 C24 H24 . . 119.4 ?
    C23 C24 H24 . . 119.4 ?
    C1 N1 N2 . . 113.45(15) ?
    C1 N1 C6 . . 130.23(15) ?
    N2 N1 C6 . . 107.36(13) ?
    N1 N2 C4 . . 102.22(13) ?
    N1 N2 C3 . . 105.24(13) ?
    C4 N2 C3 . . 114.72(15) ?
    C17 O3 C18 . . 117.17(17) ?

_shelx_res_file                         
;
TITL cyg96s in P-1
CELL 0.71073   8.72070  11.04150  12.09570  76.6178  77.3865  85.0383
ZERR    2.00   0.00050   0.00060   0.00080   0.0019   0.0021   0.0020
LATT 1
SFAC C  H  N  O  Cl
UNIT 48  54  4  6  2
L.S. 4
ACTA
BOND $H
FMAP 2
PLAN 5
SIZE 0.20 0.20 0.38
TEMP 23.000
WGHT    0.083600    0.183500
FVAR       0.23802
C1    1    0.570251    0.715083    0.298140    11.00000    0.03349    0.03461 =
         0.03658   -0.00603   -0.00405   -0.00222
C2    1    0.485382    0.603476    0.294833    11.00000    0.03505    0.04287 =
         0.05977   -0.01123   -0.00449   -0.00687
AFIX  23
H2A   2    0.409293    0.627511    0.245200    11.00000   -1.20000
H2B   2    0.430857    0.564493    0.372154    11.00000   -1.20000
AFIX   0
C3    1    0.612280    0.514684    0.246337    11.00000    0.03595    0.03318 =
         0.05364   -0.00970   -0.00815   -0.00955
AFIX  13
H3    2    0.596292    0.430959    0.295631    11.00000   -1.20000
AFIX   0
C4    1    0.815409    0.499789    0.367359    11.00000    0.04030    0.02651 =
         0.03529   -0.00410   -0.00492   -0.00253
AFIX  13
H4    2    0.724240    0.490424    0.432068    11.00000   -1.20000
AFIX   0
C5    1    0.920708    0.598163    0.378670    11.00000    0.04871    0.02794 =
         0.03796   -0.00406   -0.01431   -0.00135
AFIX  23
H5A   2    1.029613    0.581186    0.344611    11.00000   -1.20000
H5B   2    0.912956    0.599426    0.459626    11.00000   -1.20000
AFIX   0
C6    1    0.858811    0.725376    0.311524    11.00000    0.03343    0.02470 =
         0.03280   -0.00536   -0.00838   -0.00301
C7    1    0.613752    0.508467    0.121248    11.00000    0.05198    0.05822 =
         0.06474   -0.02728   -0.01819   -0.01191
AFIX  13
H7    2    0.509300    0.483054    0.120070    11.00000   -1.20000
AFIX   0
C8    1    0.640317    0.633647    0.036078    11.00000    0.11043    0.09191 =
         0.05176   -0.01246   -0.02985   -0.04035
AFIX 137
H8A   2    0.565496    0.694786    0.063162    11.00000   -1.50000
H8B   2    0.627283    0.626165   -0.038815    11.00000   -1.50000
H8C   2    0.744923    0.658930    0.030176    11.00000   -1.50000
AFIX   0
C9    1    0.730556    0.409071    0.083153    11.00000    0.08741    0.10077 =
         0.09437   -0.06440   -0.01935    0.00437
AFIX 137
H9A   2    0.716985    0.397362    0.009711    11.00000   -1.50000
H9B   2    0.713262    0.332243    0.139965    11.00000   -1.50000
H9C   2    0.835520    0.434555    0.075618    11.00000   -1.50000
AFIX   0
C10   1    0.891028    0.373172    0.359659    11.00000    0.04252    0.02655 =
         0.04221   -0.00472   -0.01139   -0.00286
C11   1    1.021404    0.359635    0.274151    11.00000    0.05226    0.03601 =
         0.06057   -0.00436   -0.00004    0.00047
AFIX  43
H11   2    1.067106    0.429877    0.223224    11.00000   -1.20000
AFIX   0
C12   1    1.084364    0.242403    0.263790    11.00000    0.06077    0.05327 =
         0.07117   -0.02105   -0.00708    0.01472
AFIX  43
H12   2    1.171878    0.234278    0.205880    11.00000   -1.20000
AFIX   0
C13   1    1.018266    0.138192    0.338537    11.00000    0.07547    0.03345 =
         0.08472   -0.01648   -0.03113    0.01325
AFIX  43
H13   2    1.061270    0.059580    0.331573    11.00000   -1.20000
AFIX   0
C14   1    0.889325    0.149874    0.423173    11.00000    0.07772    0.02726 =
         0.06703   -0.00072   -0.02710   -0.00679
AFIX  43
H14   2    0.844256    0.079146    0.473674    11.00000   -1.20000
AFIX   0
C15   1    0.825367    0.267053    0.434011    11.00000    0.05350    0.03127 =
         0.04546   -0.00154   -0.01296   -0.00635
AFIX  43
H15   2    0.737450    0.274336    0.491853    11.00000   -1.20000
AFIX   0
C16   1    0.807370    0.821945    0.386445    11.00000    0.04074    0.02816 =
         0.03776   -0.00842   -0.00410   -0.00740
AFIX  23
H16A  2    0.900114    0.844655    0.407871    11.00000   -1.20000
H16B  2    0.768175    0.896066    0.338547    11.00000   -1.20000
AFIX   0
C17   1    0.684818    0.786216    0.495549    11.00000    0.04414    0.03642 =
         0.03670   -0.01104   -0.00546   -0.00375
C18   1    0.526790    0.870876    0.646845    11.00000    0.05987    0.06735 =
         0.05082   -0.02404    0.00744   -0.00078
AFIX 137
H18A  2    0.431043    0.842493    0.636337    11.00000   -1.50000
H18B  2    0.506212    0.948929    0.670483    11.00000   -1.50000
H18C  2    0.567139    0.810449    0.705498    11.00000   -1.50000
AFIX   0
C19   1    0.985895    0.783042    0.207859    11.00000    0.03243    0.02432 =
         0.03412   -0.00711   -0.00594    0.00003
C20   1    1.128572    0.813460    0.225751    11.00000    0.03563    0.04663 =
         0.03859   -0.00680   -0.01008   -0.00449
AFIX  43
H20   2    1.146991    0.796878    0.300794    11.00000   -1.20000
AFIX   0
C21   1    1.244115    0.868209    0.133444    11.00000    0.02977    0.05183 =
         0.05432   -0.01148   -0.00591   -0.00686
AFIX  43
H21   2    1.338601    0.889368    0.146418    11.00000   -1.20000
AFIX   0
C22   1    1.216962    0.890585    0.023114    11.00000    0.03923    0.04259 =
         0.04305   -0.00903    0.00377   -0.00847
C23   1    1.077800    0.860906    0.002824    11.00000    0.05361    0.05872 =
         0.03386   -0.00947   -0.00531   -0.01526
AFIX  43
H23   2    1.060836    0.876319   -0.072555    11.00000   -1.20000
AFIX   0
C24   1    0.962644    0.807751    0.095578    11.00000    0.04039    0.04662 =
         0.03729   -0.00952   -0.00874   -0.01318
AFIX  43
H24   2    0.867784    0.788349    0.081852    11.00000   -1.20000
AFIX   0
CL1   5    1.359020    0.960349   -0.093864    11.00000    0.05995    0.09469 =
         0.05624   -0.01098    0.01666   -0.03158
N1    3    0.727583    0.686706    0.271207    11.00000    0.03197    0.02264 =
         0.03635   -0.00645   -0.00604   -0.00237
N2    3    0.762779    0.559963    0.257967    11.00000    0.03475    0.02296 =
         0.03937   -0.00856   -0.00843   -0.00283
O1    4    0.510605    0.814278    0.317399    11.00000    0.04274    0.03810 =
         0.06063   -0.01563   -0.00793    0.00674
O2    4    0.635342    0.684467    0.540035    11.00000    0.07009    0.03912 =
         0.04771   -0.00792    0.00784   -0.01637
O3    4    0.640428    0.886962    0.539475    11.00000    0.05652    0.04310 =
         0.04685   -0.01976    0.00662   -0.00602
HKLF 4

REM  cyg96s in P-1
REM R1 =  0.0455 for    3353 Fo > 4sig(Fo)  and  0.0743 for all    4698 data
REM    274 parameters refined using      0 restraints

END

WGHT      0.0836      0.1835

REM Highest difference peak  0.324,  deepest hole -0.382,  1-sigma level  0.105
Q1    1   0.7860  0.4883  0.0230  11.00000  0.05    0.32
Q2    1   0.8226  0.3798  0.1120  11.00000  0.05    0.30
Q3    1   0.9260  0.5582 -0.0451  11.00000  0.05    0.30
Q4    1   0.9694  0.4418 -0.0221  11.00000  0.05    0.29
Q5    1   0.7368  0.4479 -0.0372  11.00000  0.05    0.28
;
_shelx_res_checksum                     87843

_shelx_hkl_file                         
;
  -1   0   0   -0.02    0.02
  -1   0   0    0.06    0.03
  -1   0   0    0.02    0.02
  -1   0   0   -0.03    0.01
   1   0   0    0.01    0.02
   1   0   0   -0.03    0.01
   1   0   0   -0.01    0.02
   1   0   0    0.06    0.03
  -2   0   0    2.59    0.20
  -2   0   0    2.37    0.18
  -2   0   0    2.66    0.22
  -2   0   0    2.91    0.21
   2   0   0    2.18    0.22
   2   0   0    2.88    0.21
   2   0   0    2.86    0.20
   2   0   0    2.69    0.20
  -3   0   0   12.52    0.63
  -3   0   0   11.52    0.65
  -3   0   0   12.98    0.62
   3   0   0   13.28    0.64
   3   0   0   12.40    0.61
   3   0   0   13.08    0.48
   3   0   0   12.81    0.67
   3   0   0   12.36    0.61
  -4   0   0   13.02    0.67
  -4   0   0   12.30    0.71
   4   0   0   11.94    0.64
   4   0   0   11.68    0.64
   4   0   0   12.36    0.67
  -5   0   0    1.46    0.25
  -5   0   0    1.22    0.27
   5   0   0    1.28    0.24
   5   0   0    1.20    0.24
   5   0   0    1.43    0.26
  -6   0   0    3.45    0.47
  -6   0   0    2.81    0.22
  -6   0   0    3.16    0.41
   6   0   0    4.45    0.49
   6   0   0    2.77    0.40
   6   0   0    3.04    0.38
  -7   0   0   13.18    0.84
  -7   0   0   13.41    0.59
  -7   0   0   12.75    0.90
   7   0   0   13.17    0.85
   7   0   0   12.33    0.82
  -8   0   0   12.37    0.59
  -8   0   0   13.06    0.89
  -8   0   0   13.42    0.98
   8   0   0   12.56    0.90
   8   0   0   12.53    0.86
  -9   0   0    0.36    0.26
  -9   0   0   -0.18    0.25
   9   0   0    0.07    0.27
   9   0   0    0.01    0.22
 -10   0   0   -0.13    0.28
  10   0   0    0.03    0.29
  10   0   0   -0.12    0.25
  10  -1   0    0.45    0.33
  10  -1   0    1.44    0.40
 -10   1   0    0.86    0.42
   9  -1   0    3.19    0.54
   9  -1   0    1.93    0.42
  -9   1   0    2.62    0.54
   8  -1   0    2.71    0.47
   8  -1   0    2.26    0.41
  -8   1   0    2.02    0.39
  -8   1   0    2.02    0.47
   7  -1   0    0.35    0.25
   7  -1   0    0.64    0.26
   7  -1   0    0.39    0.21
  -7   1   0    0.23    0.08
  -7   1   0    0.30    0.09
  -7   1   0    0.39    0.22
  -7   1   0    0.52    0.27
   6  -1   0   20.60    1.02
   6  -1   0   17.82    0.95
   6  -1   0   16.92    0.98
  -6   1   0   17.86    1.08
  -6   1   0   18.78    0.98
  -6   1   0   19.00    0.77
   5  -1   0    3.20    0.37
   5  -1   0    2.57    0.32
   5  -1   0    3.10    0.37
  -5   1   0    3.19    0.42
  -5   1   0    3.78    0.37
   4  -1   0    1.95    0.26
   4  -1   0    2.37    0.27
   4  -1   0    1.73    0.23
  -4   1   0    2.34    0.26
  -4   1   0    2.37    0.25
  -4   1   0    1.39    0.26
   3  -1   0   58.14    2.30
   3  -1   0   62.56    2.43
   3  -1   0   58.48    2.31
   3  -1   0   61.31    2.34
  -3   1   0   62.00    2.32
  -3   1   0   57.86    2.42
  -3   1   0   61.19    2.32
  -3   1   0   57.37    2.31
   2  -1   0   35.63    1.36
   2  -1   0   33.34    1.35
   2  -1   0   35.74    1.44
   2  -1   0   35.03    1.35
  -2   1   0   34.45    1.35
  -2   1   0   35.11    1.44
  -2   1   0   35.40    1.36
  -2   1   0   35.30    1.26
  -2   1   0   33.69    1.35
  -2   1   0   34.25    1.29
   0  -1   0   -0.04    0.01
   0  -1   0   -0.06    0.01
   0  -1   0   -0.05    0.01
   0  -1   0   -0.06    0.00
   0   1   0   -0.06    0.01
   0   1   0   -0.05    0.01
   0   1   0   -0.05    0.00
   0   1   0   -0.04    0.01
   0   1   0   -0.06    0.01
  -2  -1   0  120.56    4.50
  -2  -1   0  116.73    4.53
  -2  -1   0  125.36    4.35
  -2  -1   0  117.85    4.32
  -2  -1   0  123.65    4.49
   2   1   0  111.20    4.34
   2   1   0  124.28    4.51
   2   1   0  118.64    4.49
  -3  -1   0    6.70    0.34
  -3  -1   0    7.79    0.44
  -3  -1   0    6.88    0.41
  -3  -1   0    6.54    0.43
  -3  -1   0    7.23    0.44
   3   1   0    7.81    0.45
   3   1   0    7.23    0.44
   3   1   0    7.28    0.43
   3   1   0    6.71    0.40
  -4  -1   0   23.16    1.03
  -4  -1   0   21.66    0.89
  -4  -1   0   20.96    1.04
  -4  -1   0   19.36    1.04
   4   1   0   23.99    0.87
   4   1   0   21.45    1.00
   4   1   0   20.27    1.02
   4   1   0   22.20    1.05
   4   1   0   22.49    1.08
  -5  -1   0    6.52    0.52
  -5  -1   0    7.45    0.40
  -5  -1   0    7.98    0.57
   5   1   0    8.18    0.57
   5   1   0    7.35    0.52
   5   1   0    7.35    0.51
   5   1   0    7.70    0.35
  -6  -1   0    1.93    0.35
  -6  -1   0    2.58    0.24
  -6  -1   0    2.07    0.35
   6   1   0    2.41    0.16
   6   1   0    2.58    0.38
   6   1   0    1.81    0.32
  -7  -1   0   22.88    1.00
  -7  -1   0   24.45    1.30
  -7  -1   0   23.85    1.33
   7   1   0   23.64    1.26
   7   1   0   23.93    1.26
  -8  -1   0    0.56    0.33
  -8  -1   0    1.08    0.33
  -8  -1   0    1.03    0.17
   8   1   0    1.32    0.36
   8   1   0    0.51    0.29
  -9  -1   0    0.88    0.36
  -9  -1   0    0.59    0.34
   9   1   0    0.62    0.31
   9   1   0    0.68    0.33
 -10  -1   0    0.97    0.45
  10   1   0    1.54    0.45
  10   1   0    0.88    0.37
  10  -2   0    1.28    0.43
  10  -2   0    0.36    0.29
 -10   2   0    0.23    0.36
   9  -2   0    0.52    0.32
   9  -2   0    0.55    0.30
  -9   2   0    0.32    0.31
   8  -2   0    0.71    0.29
   8  -2   0    1.53    0.39
  -8   2   0    0.55    0.32
  -8   2   0    1.38    0.32
   7  -2   0   -0.22    0.15
   7  -2   0   -0.15    0.18
   7  -2   0   -0.10    0.19
  -7   2   0   -0.02    0.14
  -7   2   0    0.02    0.07
  -7   2   0   -0.28    0.16
   6  -2   0    8.57    0.62
   6  -2   0    9.03    0.56
   6  -2   0    8.89    0.59
  -6   2   0    8.73    0.69
  -6   2   0    8.01    0.55
  -6   2   0    7.83    0.40
   5  -2   0   13.13    0.69
   5  -2   0   12.03    0.65
   5  -2   0   12.43    0.72
  -5   2   0   11.33    0.77
  -5   2   0   12.44    0.66
  -5   2   0   11.97    0.54
   4  -2   0   22.56    1.00
   4  -2   0   23.68    1.03
   4  -2   0   22.89    1.06
  -4   2   0   23.48    0.92
  -4   2   0   23.32    1.01
  -4   2   0   22.96    1.00
  -4   2   0   22.18    0.85
  -4   2   0   22.58    1.14
   3  -2   0   13.62    0.64
   3  -2   0   13.20    0.62
   3  -2   0   14.23    0.69
  -3   2   0   14.80    0.64
  -3   2   0   14.84    0.61
  -3   2   0   13.71    0.57
  -3   2   0   14.04    0.74
  -3   2   0   14.99    0.71
  -3   2   0   14.98    0.63
   2  -2   0   42.77    1.61
   2  -2   0   43.34    1.61
   2  -2   0   41.48    1.65
  -2   2   0   43.82    1.61
  -2   2   0   41.07    1.60
  -2   2   0   41.29    1.58
  -2   2   0   42.14    1.73
  -2   2   0   42.31    1.61
  -2   2   0   44.58    1.66
   1  -2   0  390.49   12.72
   1  -2   0  373.71   13.12
   1  -2   0  383.01   13.38
   1  -2   0  359.71   13.17
   1  -2   0  330.23   13.37
  -1   2   0  336.60   13.34
  -1   2   0  382.45   13.67
   0   2   0   32.86    1.25
  -1  -2   0    1.33    0.10
  -1  -2   0    1.15    0.14
  -1  -2   0    1.10    0.14
  -1  -2   0    0.85    0.13
  -1  -2   0    1.43    0.11
   1   2   0    0.52    0.11
   1   2   0    1.04    0.13
   1   2   0    1.06    0.10
   1   2   0    0.99    0.13
  -2  -2   0   20.05    0.91
  -2  -2   0   19.90    0.85
  -2  -2   0   21.35    0.91
  -2  -2   0   20.83    0.88
  -2  -2   0   20.73    0.84
   2   2   0   20.09    0.91
   2   2   0   19.65    0.87
   2   2   0   21.33    0.85
   2   2   0   20.22    0.90
  -3  -2   0   29.93    1.35
  -3  -2   0   29.46    1.31
  -3  -2   0   31.66    1.35
  -3  -2   0   31.28    1.24
   3   2   0   31.79    1.36
   3   2   0   30.17    1.33
   3   2   0   30.25    1.27
   3   2   0   32.62    1.34
  -4  -2   0    1.49    0.19
  -4  -2   0    1.02    0.23
  -4  -2   0    0.84    0.19
   4   2   0    1.08    0.22
   4   2   0    0.97    0.20
   4   2   0    1.00    0.23
   4   2   0    0.42    0.17
  -5  -2   0   10.28    0.68
  -5  -2   0   10.02    0.53
  -5  -2   0   10.63    0.66
   5   2   0    9.55    0.62
   5   2   0   10.71    0.51
   5   2   0    9.45    0.64
  -6  -2   0    0.70    0.25
  -6  -2   0    1.03    0.18
  -6  -2   0    0.54    0.24
   6   2   0    1.05    0.26
   6   2   0    0.94    0.16
   6   2   0    0.74    0.25
  -7  -2   0   56.75    2.61
  -7  -2   0   58.92    2.26
  -7  -2   0   59.22    2.60
   7   2   0   60.18    2.18
   7   2   0   58.01    2.56
   7   2   0   51.45    2.44
  -8  -2   0    1.44    0.38
  -8  -2   0    0.24    0.14
  -8  -2   0    0.08    0.23
   8   2   0    0.59    0.29
   8   2   0    0.58    0.30
  -9  -2   0   -0.25    0.23
  -9  -2   0    0.36    0.29
   9   2   0   -0.32    0.20
   9   2   0   -0.21    0.21
 -10  -2   0   -0.16    0.26
 -10  -2   0    0.09    0.32
  10   2   0    0.32    0.31
  10   2   0   -0.32    0.23
  10  -3   0    1.47    0.36
 -10   3   0    1.19    0.47
   9  -3   0   -0.30    0.17
   9  -3   0    0.08    0.27
  -9   3   0   -0.16    0.28
   8  -3   0   -0.30    0.15
   8  -3   0    0.38    0.28
  -8   3   0    0.23    0.29
   7  -3   0    1.21    0.33
   7  -3   0    1.81    0.35
   7  -3   0    1.74    0.30
  -7   3   0    1.37    0.20
  -7   3   0    1.70    0.30
  -7   3   0    1.41    0.39
   6  -3   0    0.51    0.18
   6  -3   0    0.57    0.20
   6  -3   0    0.35    0.21
  -6   3   0    0.34    0.16
  -6   3   0    0.71    0.27
  -6   3   0    0.71    0.14
   5  -3   0    2.98    0.31
   5  -3   0    2.29    0.34
   5  -3   0    2.88    0.29
  -5   3   0    2.79    0.17
  -5   3   0    3.14    0.30
  -5   3   0    2.06    0.37
  -5   3   0    2.80    0.23
   4  -3   0   21.87    0.91
   4  -3   0   20.61    1.01
  -4   3   0   20.68    1.08
  -4   3   0   20.96    0.90
  -4   3   0   20.31    0.85
  -4   3   0   21.18    0.90
  -4   3   0   21.69    0.90
   3  -3   0   19.63    0.86
   3  -3   0   20.96    0.83
   3  -3   0   19.34    0.93
  -3   3   0   20.35    0.82
  -3   3   0   19.24    0.82
  -3   3   0   20.43    0.89
  -3   3   0   22.13    0.95
  -3   3   0   19.94    0.99
  -3   3   0   20.43    0.86
   2  -3   0    7.81    0.33
   2  -3   0    7.13    0.32
   2  -3   0    7.42    0.40
   2  -3   0    7.51    0.42
  -2   3   0    8.14    0.43
  -2   3   0    7.86    0.45
  -2   3   0    7.31    0.39
  -2   3   0    7.55    0.40
  -2   3   0    7.44    0.31
  -2   3   0    7.61    0.31
   1  -3   0  174.03    6.34
   1  -3   0  171.97    6.04
   1  -3   0  184.27    6.40
  -1   3   0  171.69    6.33
  -1   3   0  175.88    6.04
  -1   3   0  174.61    6.34
  -1   3   0  176.27    6.30
  -1   3   0  173.07    6.39
  -1   3   0  172.26    6.45
   0  -3   0  134.05    4.64
   0  -3   0  137.84    4.99
   0  -3   0  134.59    4.86
   0  -3   0  134.41    4.92
   0  -3   0  121.85    4.97
   0   3   0  137.01    4.86
   0   3   0  134.20    4.98
   0   3   0  141.70    4.92
   0   3   0  135.33    4.97
   0   3   0  135.28    4.64
  -1  -3   0    3.59    0.26
  -1  -3   0    3.79    0.26
  -1  -3   0    3.75    0.19
  -1  -3   0    3.51    0.19
  -1  -3   0    3.65    0.21
  -1  -3   0    3.75    0.27
   1   3   0    3.58    0.25
   1   3   0    3.77    0.21
   1   3   0    3.47    0.26
   1   3   0    3.34    0.18
   1   3   0    3.68    0.25
  -2  -3   0   22.97    0.97
  -2  -3   0   23.08    1.04
  -2  -3   0   22.95    1.00
  -2  -3   0   24.68    0.95
  -2  -3   0   23.11    1.06
   2   3   0   22.67    1.04
   2   3   0   23.96    1.01
   2   3   0   23.78    0.98
   2   3   0   24.37    1.06
  -3  -3   0   92.87    3.36
  -3  -3   0   86.04    3.53
  -3  -3   0   93.28    3.53
  -3  -3   0   88.23    3.49
  -3  -3   0   87.09    3.37
   3   3   0   90.26    3.54
   3   3   0   86.88    3.51
   3   3   0   85.73    3.36
   3   3   0   95.02    3.51
   3   3   0   93.55    3.39
  -4  -3   0    6.92    0.53
  -4  -3   0    7.50    0.44
  -4  -3   0    7.71    0.47
  -4  -3   0    6.82    0.47
   4   3   0    7.82    0.51
   4   3   0    7.59    0.53
   4   3   0    7.52    0.48
  -5  -3   0    0.97    0.24
  -5  -3   0    1.02    0.19
  -5  -3   0    0.75    0.25
   5   3   0    0.40    0.21
   5   3   0    0.77    0.24
  -6  -3   0    0.64    0.18
  -6  -3   0    0.59    0.24
   6   3   0    0.81    0.18
   6   3   0    0.30    0.21
   6   3   0    1.00    0.28
  -7  -3   0    0.25    0.27
  -7  -3   0    0.63    0.19
  -7  -3   0    1.05    0.31
   7   3   0    0.67    0.29
   7   3   0    0.72    0.30
   7   3   0    0.72    0.18
  -8  -3   0   -0.19    0.19
  -8  -3   0   -0.15    0.22
  -8  -3   0    0.10    0.15
   8   3   0   -0.11    0.19
   8   3   0    0.37    0.26
  -9  -3   0    0.73    0.39
  -9  -3   0    0.33    0.29
   9   3   0    0.79    0.37
   9   3   0    0.91    0.36
 -10  -3   0    0.53    0.44
 -10  -3   0    0.30    0.31
  10   3   0    1.09    0.41
  10   3   0    0.02    0.29
  10  -4   0   -0.19    0.36
 -10   4   0   -0.15    0.32
   9  -4   0    0.43    0.26
   9  -4   0    0.09    0.28
  -9   4   0   -0.06    0.36
   8  -4   0    0.09    0.26
   8  -4   0   -0.06    0.18
  -8   4   0   -0.45    0.24
   7  -4   0    0.07    0.22
   7  -4   0   -0.14    0.12
  -7   4   0   -0.31    0.21
  -7   4   0    0.22    0.16
   6  -4   0    4.26    0.53
   6  -4   0    4.80    0.37
   6  -4   0    4.98    0.40
  -6   4   0    4.33    0.33
  -6   4   0    4.34    0.24
  -6   4   0    4.07    0.24
  -6   4   0    3.94    0.55
  -6   4   0    4.55    0.35
   5  -4   0    5.11    0.34
   5  -4   0    4.31    0.48
  -5   4   0    5.06    0.35
  -5   4   0    4.66    0.32
  -5   4   0    5.04    0.30
  -5   4   0    5.30    0.58
   4  -4   0   15.33    0.77
   4  -4   0   18.21    0.76
   4  -4   0   18.13    0.92
  -4   4   0   18.92    0.83
  -4   4   0   17.18    0.96
  -4   4   0   18.79    0.76
  -4   4   0   18.12    0.75
   3  -4   0   -0.07    0.10
   3  -4   0    0.21    0.07
   3  -4   0    0.15    0.06
   3  -4   0    0.13    0.11
  -3   4   0    0.11    0.12
  -3   4   0    0.24    0.12
  -3   4   0   -0.06    0.09
  -3   4   0    0.15    0.05
  -3   4   0    0.07    0.05
   2  -4   0   13.04    0.66
   2  -4   0   14.34    0.54
   2  -4   0   14.22    0.54
   2  -4   0   13.22    0.67
  -2   4   0   12.56    0.67
  -2   4   0   12.94    0.69
  -2   4   0   14.73    0.68
  -2   4   0   13.10    0.67
  -2   4   0   13.65    0.52
  -2   4   0   14.00    0.63
   1  -4   0   17.40    0.74
   1  -4   0   18.38    0.74
   1  -4   0   17.99    0.84
  -1   4   0   18.12    0.80
  -1   4   0   18.04    0.72
  -1   4   0   19.24    0.85
  -1   4   0   18.76    0.74
  -1   4   0   18.58    0.81
  -1   4   0   18.45    0.72
   0  -4   0   39.48    1.53
   0  -4   0   38.45    1.58
   0  -4   0   36.93    1.53
   0  -4   0   40.61    1.50
   0  -4   0   37.07    1.41
   0   4   0   38.62    1.58
   0   4   0   38.40    1.41
   0   4   0   38.16    1.52
   0   4   0   40.30    1.53
   0   4   0   40.64    1.50
  -1  -4   0    2.61    0.26
  -1  -4   0    2.83    0.24
  -1  -4   0    3.00    0.19
  -1  -4   0    3.24    0.32
  -1  -4   0    3.25    0.21
   1   4   0    3.06    0.17
   1   4   0    3.75    0.27
   1   4   0    3.05    0.25
   1   4   0    3.63    0.28
   1   4   0    3.14    0.21
  -2  -4   0    9.28    0.56
  -2  -4   0    8.93    0.53
  -2  -4   0    9.65    0.45
  -2  -4   0    9.71    0.55
  -2  -4   0    9.38    0.46
   2   4   0    9.41    0.46
   2   4   0    9.22    0.54
   2   4   0   11.38    0.58
   2   4   0    9.83    0.54
   2   4   0    9.32    0.46
  -3  -4   0    0.90    0.21
  -3  -4   0    1.03    0.22
  -3  -4   0    0.94    0.16
  -3  -4   0    0.85    0.18
  -3  -4   0    0.84    0.15
   3   4   0    1.12    0.18
   3   4   0    0.96    0.22
   3   4   0    1.10    0.20
  -4  -4   0   14.28    0.88
  -4  -4   0   15.48    0.80
  -4  -4   0   16.23    0.82
  -4  -4   0   16.98    0.79
   4   4   0   16.94    0.83
   4   4   0   16.49    0.83
   4   4   0   16.02    0.87
   4   4   0   14.77    0.80
  -5  -4   0   11.75    0.71
  -5  -4   0   11.98    0.66
  -5  -4   0   12.38    0.80
   5   4   0   11.69    0.71
   5   4   0   10.69    0.73
  -6  -4   0   43.13    1.75
  -6  -4   0   40.66    1.89
  -6  -4   0   41.17    1.97
   6   4   0   39.14    1.91
   6   4   0   39.53    1.82
  -7  -4   0   11.33    0.84
  -7  -4   0   13.72    0.75
  -7  -4   0   11.99    0.93
   7   4   0   12.68    0.89
  -8  -4   0    6.13    0.73
  -8  -4   0    5.72    0.73
  -8  -4   0    6.31    0.50
   8   4   0    5.66    0.67
   8   4   0    6.38    0.73
  -9  -4   0    0.36    0.30
  -9  -4   0    0.06    0.30
   9   4   0    0.54    0.34
   9   4   0    0.98    0.37
 -10  -4   0   -0.31    0.27
 -10  -4   0    0.28    0.33
  10   4   0   -0.15    0.28
  10   4   0    0.16    0.33
   9  -5   0    0.48    0.36
   9  -5   0    0.18    0.20
  -9   5   0    0.05    0.30
   8  -5   0    0.02    0.15
   8  -5   0   -0.02    0.26
  -8   5   0    0.02    0.28
   7  -5   0   10.90    0.81
   7  -5   0   10.54    0.61
  -7   5   0    9.23    0.94
   6  -5   0    0.32    0.23
   6  -5   0    0.19    0.12
   6  -5   0    0.09    0.11
  -6   5   0    0.14    0.10
  -6   5   0    0.11    0.13
  -6   5   0    0.31    0.12
  -6   5   0    0.25    0.25
   5  -5   0    4.25    0.28
   5  -5   0    4.74    0.51
   5  -5   0    3.97    0.30
  -5   5   0    4.66    0.41
  -5   5   0    4.21    0.32
  -5   5   0    4.66    0.54
  -5   5   0    4.43    0.26
   4  -5   0    8.92    0.62
   4  -5   0    9.85    0.45
   4  -5   0    9.47    0.43
   4  -5   0    9.97    0.57
  -4   5   0    9.83    0.40
  -4   5   0    9.95    0.68
  -4   5   0    9.17    0.39
  -4   5   0    9.13    0.56
   3  -5   0    0.02    0.05
   3  -5   0   -0.07    0.09
   3  -5   0   -0.11    0.10
   3  -5   0    0.01    0.04
  -3   5   0    0.01    0.13
  -3   5   0    0.08    0.13
  -3   5   0   -0.14    0.11
   2  -5   0  181.36    6.73
   2  -5   0  179.27    6.70
   2  -5   0  184.00    6.76
  -2   5   0  191.43    6.75
  -2   5   0  182.63    6.40
  -2   5   0  186.03    6.95
  -2   5   0  177.37    6.72
   1  -5   0   29.51    1.17
   1  -5   0   27.82    1.27
   1  -5   0   29.86    1.14
  -1   5   0   30.61    1.24
  -1   5   0   29.12    1.15
  -1   5   0   28.52    1.21
  -1   5   0   27.80    1.21
  -1   5   0   29.57    1.15
  -1   5   0   31.05    1.14
  -1   5   0   28.64    1.28
   0  -5   0    0.05    0.08
   0  -5   0   -0.04    0.06
   0  -5   0    0.05    0.11
   0  -5   0   -0.04    0.06
   0  -5   0   -0.08    0.05
   0   5   0    0.03    0.06
   0   5   0    0.06    0.08
   0   5   0    0.03    0.07
   0   5   0   -0.10    0.06
  -1  -5   0   32.19    1.34
  -1  -5   0   32.06    1.25
  -1  -5   0   31.06    1.37
  -1  -5   0   31.48    1.18
  -1  -5   0   31.37    1.36
   1   5   0   31.18    1.33
   1   5   0   31.03    1.24
   1   5   0   31.41    1.21
   1   5   0   29.93    1.33
  -2  -5   0    5.32    0.28
  -2  -5   0    4.53    0.43
  -2  -5   0    5.27    0.30
  -2  -5   0    4.98    0.41
  -2  -5   0    5.48    0.32
  -2  -5   0    5.60    0.41
   2   5   0    5.30    0.32
   2   5   0    5.44    0.40
   2   5   0    4.94    0.29
  -3  -5   0    1.01    0.24
  -3  -5   0    1.02    0.17
  -3  -5   0    0.75    0.22
  -3  -5   0    0.95    0.15
  -3  -5   0    0.78    0.20
   3   5   0    0.94    0.16
   3   5   0    1.14    0.24
  -4  -5   0    9.72    0.57
  -4  -5   0    9.81    0.69
  -4  -5   0   11.14    0.58
  -4  -5   0    9.51    0.61
   4   5   0   10.73    0.60
   4   5   0    9.34    0.66
  -5  -5   0   60.71    2.71
  -5  -5   0   63.00    2.58
  -5  -5   0   61.20    2.52
   5   5   0   62.37    2.68
   5   5   0   62.26    2.53
  -6  -5   0   27.07    1.35
  -6  -5   0   25.34    1.45
  -6  -5   0   28.81    1.31
   6   5   0   25.90    1.41
   6   5   0   27.69    1.36
  -7  -5   0    4.36    0.48
  -7  -5   0    4.70    0.67
  -7  -5   0    3.48    0.50
   7   5   0    4.67    0.57
   7   5   0    4.15    0.59
  -8  -5   0    0.24    0.33
  -8  -5   0    0.13    0.24
  -8  -5   0    0.12    0.20
   8   5   0    0.13    0.25
   8   5   0   -0.23    0.24
  -9  -5   0    2.87    0.55
  -9  -5   0    2.92    0.64
   9   5   0    3.27    0.62
   9   5   0    3.64    0.58
 -10  -5   0    0.91    0.48
 -10  -5   0    0.72    0.39
  10   5   0    0.72    0.41
  10   5   0    1.60    0.49
   9  -6   0    3.14    0.62
   9  -6   0    2.32    0.34
  -9   6   0    2.32    0.58
   8  -6   0    0.55    0.18
   8  -6   0    0.72    0.35
  -8   6   0    0.29    0.33
   7  -6   0    3.29    0.32
   7  -6   0    3.55    0.54
  -7   6   0    2.73    0.54
   6  -6   0    4.17    0.31
   6  -6   0    4.52    0.57
   6  -6   0    4.23    0.29
  -6   6   0    3.57    0.57
  -6   6   0    4.47    0.39
   5  -6   0   11.46    0.50
   5  -6   0   11.20    0.75
   5  -6   0   11.18    0.51
  -5   6   0   11.74    0.82
  -5   6   0    9.22    0.73
   4  -6   0    0.68    0.23
   4  -6   0    0.72    0.08
   4  -6   0    1.08    0.23
   4  -6   0    0.68    0.07
  -4   6   0    0.66    0.23
  -4   6   0    0.33    0.21
   3  -6   0    1.61    0.27
  -3   6   0    2.02    0.30
  -3   6   0    2.22    0.33
   2  -6   0   42.95    1.64
   2  -6   0   41.74    1.82
   2  -6   0   45.52    1.65
  -2   6   0   43.14    1.79
  -2   6   0   42.17    1.67
  -2   6   0   43.34    1.83
   1  -6   0   23.20    0.98
   1  -6   0   23.66    1.13
   1  -6   0   22.13    0.96
  -1   6   0   24.22    0.97
  -1   6   0   22.68    0.96
  -1   6   0   24.96    0.96
  -1   6   0   23.51    1.03
  -1   6   0   24.10    1.04
   0  -6   0   13.37    0.67
   0  -6   0   12.67    0.58
   0  -6   0   12.33    0.74
   0  -6   0   13.68    0.65
   0  -6   0   13.90    0.65
   0   6   0   13.10    0.64
   0   6   0   13.31    0.64
   0   6   0   13.54    0.59
   0   6   0   13.69    0.65
  -1  -6   0    2.46    0.21
  -1  -6   0    2.80    0.26
  -1  -6   0    2.51    0.29
  -1  -6   0    2.28    0.33
  -1  -6   0    2.97    0.31
   1   6   0    2.30    0.23
   1   6   0    2.55    0.15
   1   6   0    2.48    0.28
  -2  -6   0   30.18    1.43
  -2  -6   0   29.57    1.21
  -2  -6   0   28.10    1.41
  -2  -6   0   33.81    1.30
  -2  -6   0   35.00    1.45
   2   6   0   33.56    1.43
   2   6   0   31.01    1.28
   2   6   0   31.32    1.26
  -3  -6   0   15.30    0.90
  -3  -6   0   15.87    0.75
  -3  -6   0   16.68    0.73
  -3  -6   0   16.68    0.91
  -3  -6   0   14.29    0.86
   3   6   0   15.79    0.88
   3   6   0   16.75    0.75
  -4  -6   0    7.49    0.47
  -4  -6   0    6.39    0.43
  -4  -6   0    7.49    0.55
  -4  -6   0    6.32    0.64
   4   6   0    7.14    0.47
   4   6   0    6.29    0.61
  -5  -6   0    6.54    0.69
  -5  -6   0    6.82    0.56
  -5  -6   0    8.56    0.54
   5   6   0    5.85    0.58
   5   6   0    8.03    0.65
  -6  -6   0   -0.19    0.16
  -6  -6   0    0.03    0.17
  -6  -6   0   -0.05    0.18
   6   6   0   -0.04    0.20
   6   6   0    0.15    0.24
  -7  -6   0    5.70    0.60
  -7  -6   0    6.32    0.66
  -7  -6   0    5.83    0.74
   7   6   0    6.95    0.72
   7   6   0    6.41    0.74
  -8  -6   0   -0.18    0.21
  -8  -6   0   -0.23    0.19
  -8  -6   0    0.04    0.23
   8   6   0   -0.29    0.25
   8   6   0    0.06    0.26
  -9  -6   0    1.00    0.44
  -9  -6   0    0.56    0.34
   9   6   0    0.16    0.32
   9   6   0    1.68    0.51
   9  -7   0   -0.10    0.29
  -9   7   0    0.42    0.39
  -9   7   0    0.59    0.39
   8  -7   0   -0.17    0.28
   8  -7   0    0.14    0.12
  -8   7   0    0.25    0.29
  -8   7   0    0.99    0.43
   7  -7   0    0.17    0.09
  -7   7   0   -0.12    0.22
  -7   7   0    0.23    0.26
   6  -7   0    2.69    0.15
   6  -7   0    2.23    0.45
   6  -7   0    2.12    0.14
  -6   7   0    1.52    0.38
  -6   7   0    2.25    0.32
  -6   7   0    3.07    0.52
   5  -7   0    2.32    0.41
  -5   7   0    1.75    0.36
  -5   7   0    1.77    0.39
   4  -7   0    1.44    0.29
  -4   7   0    1.84    0.34
  -4   7   0    2.03    0.35
   3  -7   0   29.75    1.42
  -3   7   0   30.80    1.44
  -3   7   0   31.35    1.42
   2  -7   0    2.43    0.18
   2  -7   0    2.82    0.38
   2  -7   0    2.64    0.17
  -2   7   0    1.99    0.28
  -2   7   0    1.81    0.29
   1  -7   0    5.56    0.53
   1  -7   0    4.80    0.33
   1  -7   0    5.05    0.33
  -1   7   0    5.17    0.30
  -1   7   0    5.07    0.33
  -1   7   0    5.14    0.38
  -1   7   0    4.61    0.33
   0  -7   0    1.25    0.21
   0  -7   0    1.27    0.17
   0  -7   0    1.25    0.20
   0  -7   0    1.36    0.30
   0  -7   0    1.52    0.21
   0   7   0    1.27    0.19
   0   7   0    1.37    0.21
   0   7   0    1.61    0.19
   0   7   0    1.12    0.14
  -1  -7   0    3.49    0.32
  -1  -7   0    3.75    0.39
  -1  -7   0    3.80    0.44
  -1  -7   0    4.27    0.26
  -1  -7   0    3.23    0.35
   1   7   0    3.15    0.18
   1   7   0    3.57    0.35
   1   7   0    3.20    0.30
  -2  -7   0    5.09    0.54
  -2  -7   0    5.75    0.34
  -2  -7   0    4.45    0.49
  -2  -7   0    6.08    0.47
  -2  -7   0    6.07    0.37
   2   7   0    5.44    0.36
   2   7   0    5.17    0.43
   2   7   0    5.44    0.28
  -3  -7   0    0.96    0.18
  -3  -7   0    0.79    0.25
  -3  -7   0    0.99    0.18
  -3  -7   0    0.93    0.14
  -3  -7   0    0.61    0.24
   3   7   0    1.23    0.17
   3   7   0    0.70    0.23
  -4  -7   0   13.22    0.86
  -4  -7   0   16.08    0.96
  -4  -7   0   14.94    0.73
   4   7   0   15.04    0.75
   4   7   0   13.84    0.89
  -5  -7   0   24.89    1.16
  -5  -7   0   24.18    1.38
  -5  -7   0   23.85    1.27
   5   7   0   24.73    1.34
   5   7   0   23.56    1.21
  -6  -7   0    6.41    0.66
  -6  -7   0    6.94    0.79
  -6  -7   0    7.63    0.56
   6   7   0    5.75    0.68
   6   7   0    6.29    0.65
  -7  -7   0   -0.01    0.21
  -7  -7   0   -0.33    0.22
  -7  -7   0   -0.05    0.18
   7   7   0    0.00    0.24
   7   7   0   -0.02    0.27
  -8  -7   0    1.09    0.35
  -8  -7   0    0.84    0.39
  -8  -7   0    1.32    0.37
   8   7   0    1.08    0.41
   8   7   0    0.57    0.32
  -9  -7   0    1.47    0.43
  -9  -7   0    1.60    0.48
   9   7   0    1.84    0.46
   9   7   0    0.99    0.46
   8  -8   0    0.41    0.35
  -8   8   0    0.30    0.34
  -8   8   0    0.49    0.34
   7  -8   0   -0.08    0.30
  -7   8   0   -0.12    0.28
  -7   8   0    0.07    0.27
   6  -8   0    0.80    0.34
  -6   8   0    1.04    0.34
  -6   8   0    1.02    0.33
  -6   8   0    0.66    0.24
   5  -8   0    2.86    0.41
  -5   8   0    2.46    0.45
  -5   8   0    1.70    0.39
   4  -8   0   10.08    0.73
  -4   8   0   12.30    0.79
  -4   8   0   11.58    0.77
   3  -8   0    0.14    0.19
  -3   8   0   -0.33    0.15
  -3   8   0    0.30    0.19
   2  -8   0   13.23    0.58
   2  -8   0   13.48    0.59
   2  -8   0   13.17    0.83
  -2   8   0   12.82    0.72
  -2   8   0   13.35    0.76
   1  -8   0    0.43    0.13
   1  -8   0    0.26    0.20
   1  -8   0    0.10    0.07
   1  -8   0    0.44    0.15
  -1   8   0    0.38    0.11
  -1   8   0    0.31    0.12
  -1   8   0    0.18    0.15
  -1   8   0    0.22    0.12
   0  -8   0    1.57    0.21
   0  -8   0    1.73    0.24
   0  -8   0    2.15    0.37
   0  -8   0    1.51    0.24
   0   8   0    1.72    0.25
   0   8   0    1.96    0.18
   0   8   0    1.94    0.17
   0   8   0    2.14    0.26
   0   8   0    1.99    0.23
  -1  -8   0   26.19    1.12
  -1  -8   0   24.11    1.01
  -1  -8   0   24.73    1.30
  -1  -8   0   25.43    1.22
  -1  -8   0   25.50    1.19
   1   8   0   26.01    1.11
   1   8   0   24.37    1.17
  -2  -8   0    3.11    0.28
  -2  -8   0    3.41    0.41
  -2  -8   0    2.64    0.38
  -2  -8   0    2.89    0.42
  -2  -8   0    2.59    0.29
   2   8   0    2.44    0.35
   2   8   0    2.74    0.29
  -3  -8   0   -0.12    0.17
  -3  -8   0    0.05    0.11
  -3  -8   0    0.21    0.21
  -3  -8   0    0.02    0.12
   3   8   0    0.06    0.13
   3   8   0    0.39    0.20
  -4  -8   0    0.53    0.14
  -4  -8   0    0.51    0.16
  -4  -8   0    0.22    0.23
  -4  -8   0    0.47    0.25
   4   8   0    0.52    0.25
  -5  -8   0    0.81    0.31
  -5  -8   0    1.24    0.23
  -5  -8   0    1.13    0.36
   5   8   0    1.46    0.37
  -6  -8   0    1.81    0.41
  -6  -8   0    1.71    0.30
   6   8   0    1.27    0.38
   6   8   0    1.56    0.42
  -7  -8   0    0.03    0.23
  -7  -8   0    0.35    0.34
  -7  -8   0    0.00    0.20
   7   8   0    0.21    0.27
   7   8   0   -0.10    0.25
  -8  -8   0   -0.08    0.22
  -8  -8   0    0.25    0.27
  -8  -8   0    0.13    0.36
   8   8   0    0.86    0.36
   8   8   0    0.21    0.34
  -7   9   0    0.16    0.29
  -7   9   0   -0.17    0.26
  -6   9   0    0.31    0.28
  -6   9   0    0.07    0.18
  -6   9   0   -0.17    0.24
   5  -9   0    0.23    0.21
  -5   9   0    0.00    0.23
  -5   9   0   -0.08    0.21
   4  -9   0    3.05    0.47
  -4   9   0    3.61    0.49
  -4   9   0    2.05    0.41
   3  -9   0   12.84    0.86
  -3   9   0   11.92    0.78
  -3   9   0   11.62    0.75
   2  -9   0    2.49    0.20
   2  -9   0    1.94    0.38
  -2   9   0    1.96    0.35
  -2   9   0    2.64    0.32
   1  -9   0    7.48    0.49
   1  -9   0    8.68    0.50
   1  -9   0    7.62    0.74
  -1   9   0    8.78    0.46
  -1   9   0    7.91    0.56
  -1   9   0    7.64    0.46
   0  -9   0    4.53    0.58
   0  -9   0    4.48    0.34
   0  -9   0    4.83    0.45
   0  -9   0    5.07    0.39
   0   9   0    4.30    0.25
   0   9   0    4.34    0.25
   0   9   0    5.06    0.43
   0   9   0    3.87    0.40
  -1  -9   0    8.86    0.81
  -1  -9   0    9.11    0.48
  -1  -9   0    8.62    0.60
  -1  -9   0    9.08    0.63
   1   9   0    8.92    0.59
   1   9   0    8.46    0.54
  -2  -9   0    1.48    0.32
  -2  -9   0    1.13    0.33
  -2  -9   0    2.03    0.36
  -2  -9   0    1.56    0.21
   2   9   0    1.44    0.25
   2   9   0    1.56    0.30
  -3  -9   0   10.45    0.80
  -3  -9   0   10.12    0.55
  -3  -9   0    9.36    0.77
   3   9   0   10.07    0.59
   3   9   0   10.40    0.75
  -4  -9   0   18.89    0.90
  -4  -9   0   20.57    1.20
  -4  -9   0   20.18    1.22
   4   9   0   19.25    1.16
  -5  -9   0    0.15    0.14
  -5  -9   0    0.36    0.32
  -5  -9   0    0.11    0.15
  -5  -9   0    0.29    0.28
   5   9   0    0.13    0.27
  -6  -9   0   -0.05    0.22
  -6  -9   0    0.00    0.26
   6   9   0   -0.36    0.23
   6   9   0   -0.16    0.24
  -7  -9   0    0.06    0.31
  -7  -9   0    0.18    0.28
   7   9   0    0.00    0.29
   7   9   0    0.21    0.31
  -8  -9   0   -0.06    0.31
  -8  -9   0   -0.10    0.26
   8   9   0    0.13    0.29
   8   9   0    0.42    0.36
  -7  10   0   -0.02    0.32
  -7  10   0   -0.12    0.29
  -6  10   0    0.06    0.27
  -6  10   0    0.39    0.29
   5 -10   0   -0.05    0.19
  -5  10   0   -0.33    0.20
  -5  10   0   -0.29    0.21
   4 -10   0    1.96    0.42
  -4  10   0    1.82    0.38
  -4  10   0    1.93    0.37
   3 -10   0    0.36    0.27
  -3  10   0    0.15    0.19
  -3  10   0    0.30    0.23
   2 -10   0    0.07    0.08
   2 -10   0   -0.17    0.20
   2 -10   0    0.08    0.10
  -2  10   0    0.10    0.15
  -2  10   0   -0.04    0.18
   1 -10   0    2.17    0.29
   1 -10   0    2.97    0.49
  -1  10   0    2.48    0.26
  -1  10   0    2.94    0.39
   0 -10   0    5.07    0.37
   0 -10   0    4.75    0.62
   0 -10   0    5.07    0.48
   0  10   0    4.49    0.46
  -1 -10   0    4.13    0.32
  -1 -10   0    3.65    0.46
  -1 -10   0    3.93    0.57
   1  10   0    4.21    0.46
   1  10   0    4.53    0.43
  -2 -10   0   -0.02    0.20
  -2 -10   0   -0.24    0.21
  -2 -10   0    0.08    0.12
   2  10   0    0.14    0.16
   2  10   0    0.26    0.19
  -3 -10   0    0.20    0.21
  -3 -10   0    0.00    0.27
  -3 -10   0    0.21    0.14
   3  10   0    0.05    0.21
   3  10   0    0.23    0.17
  -4 -10   0    0.52    0.31
  -4 -10   0    1.24    0.39
  -4 -10   0    0.49    0.18
   4  10   0    0.50    0.29
  -5 -10   0    0.04    0.26
  -5 -10   0   -0.16    0.13
   5  10   0   -0.07    0.24
  -6 -10   0    3.68    0.62
  -6 -10   0    2.84    0.59
   6  10   0    2.91    0.53
   6  10   0    2.94    0.56
  -7 -10   0   -0.07    0.29
  -7 -10   0   -0.06    0.33
   7  10   0   -0.29    0.28
   7  10   0    0.22    0.29
  -6  11   0   -0.14    0.28
   5 -11   0   -0.13    0.20
  -5  11   0    0.00    0.24
   4 -11   0    0.05    0.25
  -4  11   0   -0.13    0.22
   3 -11   0    0.90    0.33
  -3  11   0    1.15    0.34
   2 -11   0    1.47    0.17
   2 -11   0    1.63    0.41
  -2  11   0    0.75    0.27
   1 -11   0    0.90    0.35
   1 -11   0    0.45    0.18
  -1  11   0    0.47    0.24
   0 -11   0    1.57    0.25
   0 -11   0    1.85    0.44
   0  11   0    1.32    0.29
  -1 -11   0   -0.08    0.24
  -1 -11   0    0.22    0.14
   1  11   0    0.01    0.16
  -2 -11   0    1.04    0.31
  -2 -11   0    1.59    0.43
   2  11   0    1.80    0.30
  -3 -11   0   17.27    1.19
  -4 -11   0   -0.18    0.27
  -5 -11   0    0.16    0.29
  -5 -11   0    0.01    0.29
   5  11   0    0.32    0.30
  -6 -11   0    0.21    0.32
  -6 -11   0    0.24    0.34
   6  11   0    0.87    0.37
   6  11   0    0.51    0.35
   4 -12   0    0.64    0.35
  -4  12   0    1.89    0.44
   3 -12   0    1.51    0.43
  -3  12   0    1.48    0.40
   2 -12   0    0.13    0.28
  -2  12   0    0.17    0.25
   1 -12   0    0.03    0.13
   1 -12   0    0.06    0.25
  -1  12   0    0.37    0.23
   0 -12   0    1.39    0.30
   0 -12   0    0.85    0.37
  -1 -12   0    0.03    0.25
  -1 -12   0    0.02    0.19
  -2 -12   0    3.10    0.59
  -2 -12   0    2.03    0.43
  -3 -12   0    1.99    0.52
  -3 -12   0    2.92    0.52
  -4 -12   0   -0.15    0.31
  -4 -12   0    0.06    0.28
  -5 -12   0    0.14    0.32
  -5 -12   0    0.16    0.33
   2 -13   0    0.45    0.36
   1 -13   0    0.16    0.30
   1 -13   0    0.39    0.18
   0 -13   0    1.42    0.46
   0 -13   0    1.85    0.34
  -1 -13   0    0.16    0.22
  -1 -13   0   -0.14    0.28
  -2 -13   0   -0.03    0.23
  -2 -13   0    0.18    0.28
  -3 -13   0   -0.45    0.29
  -3 -13   0   -0.21    0.22
  -2 -13   1    0.81    0.43
  -2 -13   1    0.09    0.27
  -1 -13   1    0.16    0.23
  -1 -13   1    0.05    0.31
   0 -13   1    0.57    0.25
   0 -13   1    1.26    0.45
   1 -13   1    0.42    0.34
   2 -13   1    2.35    0.57
  -4 -12   1   -0.18    0.26
  -4 -12   1   -0.14    0.29
  -3 -12   1    5.20    0.74
  -3 -12   1    3.69    0.60
  -2 -12   1    0.53    0.29
  -2 -12   1    0.83    0.39
  -1 -12   1    0.93    0.30
  -1 -12   1    0.78    0.36
   0 -12   1    0.55    0.37
   0 -12   1    0.78    0.26
   1 -12   1    0.35    0.32
   1 -12   1    0.41    0.16
   2 -12   1    0.66    0.34
   3 -12   1    1.76    0.46
  -4  12  -1    0.06    0.24
   4 -12   1    0.03    0.27
   6  11  -1    0.61    0.34
  -6 -11   1    0.55    0.39
  -6 -11   1    0.01    0.36
  -5 -11   1    2.49    0.55
  -5 -11   1    2.28    0.53
  -4 -11   1    1.74    0.44
  -4 -11   1    1.47    0.45
  -3 -11   1    0.86    0.37
  -3 -11   1    0.34    0.28
  -2 -11   1    4.12    0.65
  -2 -11   1    3.65    0.52
  -2 -11   1    4.61    0.42
  -1 -11   1    1.81    0.27
  -1 -11   1    1.58    0.33
  -1 -11   1    1.46    0.41
   0  11  -1    2.48    0.34
   0 -11   1    2.86    0.38
   0 -11   1    2.70    0.34
   0 -11   1    2.30    0.47
  -1  11  -1    1.80    0.32
   1 -11   1    1.55    0.29
   1 -11   1    1.22    0.23
   1 -11   1    1.56    0.41
  -2  11  -1    0.10    0.20
   2 -11   1   -0.27    0.22
  -3  11  -1    0.38    0.26
   3 -11   1    0.59    0.34
  -4  11  -1    0.40    0.28
   4 -11   1    0.30    0.27
  -5  11  -1    0.23    0.27
  -5  11  -1   -0.06    0.26
   7  10  -1   -0.07    0.28
   7  10  -1    0.17    0.36
  -7 -10   1   -0.29    0.25
  -7 -10   1   -0.43    0.28
   6  10  -1    0.86    0.35
   6  10  -1    0.21    0.31
  -6 -10   1    0.43    0.25
  -6 -10   1    0.70    0.41
  -6 -10   1    1.17    0.40
   5  10  -1    1.71    0.46
  -5 -10   1    0.72    0.24
  -5 -10   1    1.46    0.46
  -5 -10   1    2.05    0.48
   4  10  -1   -0.33    0.20
  -4 -10   1   -0.14    0.21
  -4 -10   1   -0.17    0.13
  -4 -10   1    0.09    0.28
   3  10  -1    2.64    0.44
  -3 -10   1    1.97    0.46
  -3 -10   1    2.71    0.33
  -3 -10   1    2.67    0.48
   2  10  -1   -0.12    0.17
   2  10  -1    0.00    0.12
  -2 -10   1    0.25    0.23
  -2 -10   1   -0.01    0.23
  -2 -10   1    0.06    0.14
   1  10  -1    2.47    0.29
  -1 -10   1    2.07    0.43
  -1 -10   1    2.15    0.29
  -1 -10   1    2.46    0.38
   0  10  -1    0.00    0.14
   0 -10   1   -0.08    0.22
   0 -10   1    0.09    0.14
   0 -10   1    0.26    0.18
  -1  10  -1    3.25    0.33
  -1  10  -1    3.47    0.40
   1 -10   1    3.66    0.35
   1 -10   1    4.02    0.57
   1 -10   1    3.14    0.37
  -2  10  -1    7.40    0.55
  -2  10  -1    6.44    0.50
   2 -10   1    6.34    0.32
   2 -10   1    7.25    0.53
   2 -10   1    6.50    0.73
   2 -10   1    6.34    0.32
  -3  10  -1    0.80    0.27
  -3  10  -1    1.19    0.31
   3 -10   1    0.92    0.33
  -4  10  -1    1.44    0.35
  -4  10  -1    1.31    0.35
   4 -10   1    1.01    0.35
  -5  10  -1    2.42    0.44
  -5  10  -1    1.98    0.43
  -5  10  -1    2.10    0.41
  -6  10  -1    0.62    0.35
  -6  10  -1    0.45    0.32
  -6  10  -1    0.35    0.28
   8   9  -1    0.31    0.36
   8   9  -1    0.86    0.36
  -8  -9   1    0.26    0.30
   7   9  -1    0.35    0.33
   7   9  -1    0.21    0.26
  -7  -9   1    0.36    0.32
  -7  -9   1    0.78    0.40
   6   9  -1    2.19    0.50
   6   9  -1    2.78    0.46
  -6  -9   1    2.60    0.50
  -6  -9   1    2.21    0.38
  -6  -9   1    1.91    0.50
   5   9  -1    2.51    0.48
   5   9  -1    2.36    0.42
  -5  -9   1    1.89    0.29
  -5  -9   1    2.27    0.47
  -5  -9   1    2.12    0.46
  -5  -9   1    2.46    0.36
   4   9  -1    4.58    0.58
  -4  -9   1    4.52    0.62
  -4  -9   1    5.67    0.69
  -4  -9   1    4.65    0.45
   3   9  -1    1.84    0.37
  -3  -9   1    2.68    0.44
  -3  -9   1    1.97    0.42
  -3  -9   1    2.14    0.29
   2   9  -1    2.18    0.36
   2   9  -1    2.19    0.26
  -2  -9   1    1.74    0.35
  -2  -9   1    1.77    0.40
  -2  -9   1    1.96    0.27
   1   9  -1   26.15    1.09
   1   9  -1   26.31    1.26
   1   9  -1   26.27    1.15
  -1  -9   1   25.47    1.40
  -1  -9   1   29.08    1.31
  -1  -9   1   27.34    1.14
  -1  -9   1   25.96    1.30
   0   9  -1   31.79    1.30
   0   9  -1   31.20    1.34
   0   9  -1   30.06    1.37
   0  -9   1   33.65    1.33
   0  -9   1   31.64    1.40
   0  -9   1   30.65    1.59
   0  -9   1   31.32    1.42
  -1   9  -1   11.93    0.70
  -1   9  -1   12.79    0.61
  -1   9  -1   12.95    0.68
   1  -9   1   12.88    0.64
   1  -9   1   12.59    0.88
   1  -9   1   12.73    0.66
   1  -9   1   14.01    0.71
  -2   9  -1    3.28    0.37
  -2   9  -1    2.80    0.38
   2  -9   1    3.30    0.20
   2  -9   1    3.44    0.51
   2  -9   1    2.83    0.19
   2  -9   1    2.99    0.37
  -3   9  -1   23.88    1.29
  -3   9  -1   27.33    1.30
   3  -9   1   27.46    1.41
  -4   9  -1    5.03    0.59
  -4   9  -1    6.44    0.62
   4  -9   1    5.86    0.67
  -5   9  -1    0.42    0.27
  -5   9  -1    0.04    0.17
  -5   9  -1    0.20    0.22
  -6   9  -1   -0.09    0.19
  -6   9  -1    0.15    0.29
  -6   9  -1    0.31    0.27
  -7   9  -1    0.14    0.28
  -7   9  -1   -0.09    0.29
   8   8  -1    0.32    0.29
   8   8  -1   -0.13    0.32
  -8  -8   1   -0.03    0.25
  -8  -8   1    0.37    0.37
  -8  -8   1   -0.11    0.26
   7   8  -1    0.68    0.39
   7   8  -1    0.62    0.32
  -7  -8   1    0.71    0.39
  -7  -8   1    0.75    0.28
  -7  -8   1    0.67    0.33
   6   8  -1    1.54    0.37
   6   8  -1    1.25    0.39
  -6  -8   1    1.40    0.41
  -6  -8   1    1.13    0.34
  -6  -8   1    1.18    0.29
   5   8  -1   18.65    1.06
   5   8  -1   21.82    1.25
  -5  -8   1   20.75    1.18
  -5  -8   1   18.95    0.99
  -5  -8   1   20.18    1.26
   4   8  -1    2.13    0.40
  -4  -8   1    2.38    0.32
  -4  -8   1    1.57    0.39
  -4  -8   1    2.04    0.41
  -4  -8   1    1.91    0.26
   3   8  -1    3.41    0.44
   3   8  -1    2.83    0.29
  -3  -8   1    3.68    0.36
  -3  -8   1    3.57    0.32
  -3  -8   1    3.01    0.47
   2   8  -1    9.95    0.54
   2   8  -1   10.05    0.67
   2   8  -1   10.59    0.52
  -2  -8   1   11.06    0.54
  -2  -8   1    9.75    0.72
  -2  -8   1   11.09    0.71
  -2  -8   1   10.37    0.57
   1   8  -1    0.12    0.11
   1   8  -1    0.04    0.08
   1   8  -1    0.36    0.16
  -1  -8   1    0.01    0.08
  -1  -8   1    0.02    0.13
  -1  -8   1   -0.09    0.09
  -1  -8   1    0.20    0.22
   0   8  -1    0.06    0.12
   0   8  -1   -0.14    0.08
   0   8  -1    0.04    0.11
   0  -8   1    0.01    0.12
   0  -8   1    0.06    0.11
   0  -8   1   -0.21    0.17
  -1   8  -1    8.53    0.51
  -1   8  -1    8.06    0.41
   1  -8   1    6.79    0.41
   1  -8   1    8.31    0.64
   1  -8   1    7.74    0.45
   1  -8   1    7.08    0.47
  -2   8  -1    0.89    0.22
  -2   8  -1    0.60    0.19
   2  -8   1    0.51    0.09
   2  -8   1    0.50    0.09
   2  -8   1    0.52    0.24
   2  -8   1    0.49    0.19
  -3   8  -1    7.37    0.55
  -3   8  -1    7.98    0.59
   3  -8   1    7.78    0.63
  -4   8  -1    0.53    0.26
  -4   8  -1   -0.07    0.19
   4  -8   1   -0.18    0.16
  -5   8  -1    5.22    0.60
  -5   8  -1    5.65    0.57
  -5   8  -1    5.69    0.64
  -6   8  -1    0.27    0.26
  -6   8  -1    0.22    0.20
  -6   8  -1    0.51    0.30
   6  -8   1    0.77    0.34
  -7   8  -1    0.19    0.27
  -7   8  -1    0.20    0.33
   7  -8   1    0.93    0.37
  -8   8  -1    0.50    0.40
  -8   8  -1    0.15    0.32
   8  -8   1    0.23    0.32
   9   7  -1    2.07    0.57
   9   7  -1    1.28    0.39
  -9  -7   1    1.55    0.45
  -9  -7   1    1.46    0.56
   8   7  -1    2.25    0.54
   8   7  -1    2.23    0.44
  -8  -7   1    2.05    0.56
  -8  -7   1    2.56    0.46
  -8  -7   1    2.90    0.51
   7   7  -1    0.39    0.27
   7   7  -1    0.42    0.35
  -7  -7   1    0.31    0.26
  -7  -7   1    0.08    0.22
  -7  -7   1    0.49    0.35
   6   7  -1    6.01    0.61
   6   7  -1    5.16    0.65
  -6  -7   1    5.66    0.61
  -6  -7   1    4.78    0.68
  -6  -7   1    4.48    0.50
   5   7  -1   17.98    1.10
   5   7  -1   16.83    0.98
  -5  -7   1   18.06    1.15
  -5  -7   1   18.75    0.96
  -5  -7   1   18.49    1.05
   4   7  -1   -0.02    0.12
   4   7  -1    0.10    0.20
  -4  -7   1   -0.20    0.10
  -4  -7   1   -0.04    0.18
  -4  -7   1   -0.07    0.11
   3   7  -1    3.00    0.30
   3   7  -1    3.23    0.43
  -3  -7   1    3.17    0.33
  -3  -7   1    3.69    0.47
  -3  -7   1    2.76    0.41
  -3  -7   1    3.48    0.27
   2   7  -1   23.46    1.15
   2   7  -1   23.08    1.01
   2   7  -1   24.44    0.99
  -2  -7   1   24.42    1.19
  -2  -7   1   23.14    1.00
  -2  -7   1   24.68    1.00
  -2  -7   1   23.62    1.22
  -2  -7   1   21.60    1.17
   1   7  -1    0.07    0.09
   1   7  -1    0.04    0.13
   1   7  -1   -0.02    0.07
  -1  -7   1   -0.08    0.10
  -1  -7   1   -0.01    0.09
  -1  -7   1    0.07    0.07
  -1  -7   1   -0.11    0.14
  -1  -7   1    0.02    0.12
   0   7  -1   26.33    1.11
   0   7  -1   26.11    1.07
   0   7  -1   24.73    1.07
   0   7  -1   24.49    1.05
   0  -7   1   26.19    1.13
   0  -7   1   24.94    1.05
   0  -7   1   23.75    1.23
  -1   7  -1    0.26    0.09
  -1   7  -1    0.37    0.13
  -1   7  -1    0.36    0.13
   1  -7   1    0.29    0.10
   1  -7   1    0.15    0.08
   1  -7   1    0.06    0.16
   1  -7   1    0.14    0.13
  -2   7  -1    2.14    0.29
  -2   7  -1    2.24    0.29
   2  -7   1    1.86    0.12
   2  -7   1    1.97    0.13
   2  -7   1    1.97    0.34
   2  -7   1    1.52    0.25
  -3   7  -1    0.04    0.14
  -3   7  -1    0.17    0.18
   3  -7   1    0.05    0.16
  -4   7  -1    0.19    0.19
  -4   7  -1    0.17    0.18
   4  -7   1    0.09    0.18
  -5   7  -1    1.71    0.35
  -5   7  -1    2.37    0.42
  -5   7  -1    1.43    0.28
   5  -7   1    2.07    0.38
  -6   7  -1    1.01    0.35
  -6   7  -1    0.96    0.24
  -6   7  -1    0.49    0.30
   6  -7   1    1.09    0.34
  -7   7  -1    2.18    0.49
  -7   7  -1    1.29    0.39
   7  -7   1    3.10    0.52
  -8   7  -1    0.42    0.37
  -8   7  -1    2.25    0.50
   8  -7   1    0.99    0.37
  -9   7  -1    0.85    0.45
  -9   7  -1    0.74    0.39
   9  -7   1    0.23    0.35
   9   6  -1   -0.12    0.28
   9   6  -1    0.35    0.31
  -9  -6   1   -0.05    0.33
  -9  -6   1   -0.13    0.24
   8   6  -1    0.20    0.29
   8   6  -1    0.72    0.38
  -8  -6   1    0.31    0.27
  -8  -6   1    0.30    0.24
  -8  -6   1    0.08    0.32
   7   6  -1   -0.14    0.23
   7   6  -1    0.16    0.24
  -7  -6   1    0.33    0.30
  -7  -6   1    0.03    0.19
  -7  -6   1    0.24    0.23
   6   6  -1   12.86    0.84
   6   6  -1   12.84    0.93
  -6  -6   1   13.81    1.00
  -6  -6   1   14.16    0.85
  -6  -6   1   12.60    0.81
   5   6  -1    2.08    0.40
   5   6  -1    2.09    0.34
  -5  -6   1    2.24    0.43
  -5  -6   1    3.37    0.40
  -5  -6   1    2.17    0.36
   4   6  -1    4.29    0.51
   4   6  -1    4.65    0.43
  -4  -6   1    4.09    0.39
  -4  -6   1    4.03    0.47
  -4  -6   1    4.46    0.34
   3   6  -1    1.50    0.22
   3   6  -1    0.97    0.25
  -3  -6   1    1.71    0.20
  -3  -6   1    1.25    0.28
  -3  -6   1    0.99    0.25
  -3  -6   1    1.63    0.21
   2   6  -1    7.26    0.51
   2   6  -1    7.83    0.39
   2   6  -1    7.13    0.41
  -2  -6   1    7.74    0.39
  -2  -6   1    7.19    0.42
  -2  -6   1    7.40    0.52
  -2  -6   1    6.77    0.53
  -2  -6   1    6.40    0.51
   1   6  -1    7.78    0.49
   1   6  -1    7.41    0.40
   1   6  -1    7.31    0.39
  -1  -6   1    9.17    0.52
  -1  -6   1    8.31    0.51
  -1  -6   1    7.93    0.40
  -1  -6   1    7.33    0.42
  -1  -6   1    8.12    0.56
   0   6  -1    1.85    0.22
   0   6  -1    2.30    0.22
   0   6  -1    2.08    0.22
   0  -6   1    1.99    0.22
   0  -6   1    1.75    0.23
   0  -6   1    2.47    0.32
   0  -6   1    2.42    0.25
  -1   6  -1    2.50    0.17
  -1   6  -1    2.55    0.18
  -1   6  -1    2.16    0.25
  -1   6  -1    2.19    0.24
   1  -6   1    1.58    0.17
   1  -6   1    2.31    0.25
   1  -6   1    2.24    0.21
   1  -6   1    3.84    0.40
  -2   6  -1   18.21    0.87
   2  -6   1   18.27    0.95
   2  -6   1   17.66    0.69
   2  -6   1   19.55    0.86
   2  -6   1   18.53    0.69
  -3   6  -1   14.34    0.76
  -3   6  -1   13.21    0.77
   3  -6   1   12.79    0.70
   3  -6   1   12.98    0.77
  -4   6  -1    9.63    0.67
  -4   6  -1   10.20    0.66
   4  -6   1    8.74    0.62
   4  -6   1    9.27    0.62
  -5   6  -1    1.93    0.29
  -5   6  -1    2.36    0.43
   5  -6   1    2.67    0.39
  -6   6  -1    4.81    0.63
  -6   6  -1    5.16    0.41
   6  -6   1    4.70    0.57
   6  -6   1    4.86    0.26
   6  -6   1    5.01    0.26
  -7   6  -1   -0.14    0.27
   7  -6   1   -0.01    0.21
   7  -6   1    0.06    0.09
  -8   6  -1   -0.03    0.28
   8  -6   1   -0.12    0.25
   8  -6   1    0.23    0.13
  -9   6  -1    0.08    0.33
   9  -6   1   -0.06    0.14
   9  -6   1    0.11    0.31
   9   5  -1    0.65    0.33
   9   5  -1    0.07    0.29
  -9  -5   1    0.34    0.34
  -9  -5   1    0.07    0.29
   8   5  -1    2.13    0.43
   8   5  -1    2.66    0.52
  -8  -5   1    2.01    0.43
  -8  -5   1    2.67    0.56
  -8  -5   1    1.49    0.33
   7   5  -1    6.98    0.79
   7   5  -1    7.35    0.71
  -7  -5   1    7.84    0.77
  -7  -5   1    8.06    0.59
  -7  -5   1    6.49    0.79
   6   5  -1    0.13    0.19
   6   5  -1   -0.04    0.18
  -6  -5   1    0.22    0.22
  -6  -5   1    0.00    0.17
  -6  -5   1    0.17    0.24
   5   5  -1    7.94    0.56
   5   5  -1    7.14    0.68
  -5  -5   1    7.39    0.55
  -5  -5   1    7.85    0.55
  -5  -5   1    7.07    0.71
   4   5  -1   15.90    0.89
   4   5  -1   16.92    0.88
   4   5  -1   18.44    1.00
  -4  -5   1   18.19    0.92
  -4  -5   1   17.51    0.89
  -4  -5   1   19.80    0.85
   3   5  -1   28.63    1.27
   3   5  -1   27.39    1.34
  -3  -5   1   32.35    1.40
  -3  -5   1   28.76    1.31
  -3  -5   1   28.71    1.25
  -3  -5   1   27.15    1.37
  -3  -5   1   29.78    1.18
   2   5  -1   44.75    1.86
   2   5  -1   45.30    1.77
  -2  -5   1   43.73    1.75
  -2  -5   1   44.42    1.67
  -2  -5   1   45.41    1.87
  -2  -5   1   43.33    1.88
  -2  -5   1   41.96    1.83
  -2  -5   1   42.14    1.66
   1   5  -1    6.16    0.34
   1   5  -1    6.10    0.32
   1   5  -1    6.70    0.41
  -1  -5   1    6.28    0.41
  -1  -5   1    6.58    0.32
  -1  -5   1    5.96    0.40
  -1  -5   1    6.17    0.35
  -1  -5   1    5.99    0.44
   0   5  -1    1.38    0.18
   0   5  -1    1.80    0.20
   0   5  -1    1.29    0.17
   0   5  -1    1.47    0.16
   0  -5   1    1.67    0.19
   0  -5   1    1.33    0.18
   0  -5   1    1.12    0.22
   0  -5   1    1.23    0.17
  -1   5  -1   31.45    1.26
  -1   5  -1   32.57    1.32
  -1   5  -1   31.72    1.24
  -1   5  -1   33.15    1.30
  -1   5  -1   32.56    1.25
   1  -5   1   31.50    1.26
   1  -5   1   32.52    1.41
  -2   5  -1    1.57    0.22
  -2   5  -1    1.48    0.21
   2  -5   1    1.82    0.23
   2  -5   1    1.69    0.27
  -3   5  -1    0.18    0.15
   3  -5   1   -0.16    0.10
   3  -5   1    0.08    0.12
   3  -5   1   -0.14    0.11
  -4   5  -1    4.42    0.34
  -4   5  -1    4.61    0.49
   4  -5   1    3.60    0.42
  -5   5  -1    8.42    0.75
  -5   5  -1    6.87    0.45
   5  -5   1    6.08    0.59
   5  -5   1    6.84    0.35
   5  -5   1    7.23    0.35
  -6   5  -1   11.68    0.53
  -6   5  -1   11.55    0.89
  -6   5  -1   11.37    0.61
   6  -5   1   12.25    0.58
   6  -5   1   12.51    0.61
   6  -5   1   11.71    0.81
  -7   5  -1    0.49    0.14
  -7   5  -1    0.16    0.28
   7  -5   1    0.47    0.16
   7  -5   1    0.18    0.26
  -8   5  -1    2.09    0.50
   8  -5   1    2.74    0.52
   8  -5   1    1.71    0.28
  -9   5  -1    1.08    0.43
   9  -5   1    0.67    0.39
   9  -5   1    0.78    0.24
  10   4  -1   -0.01    0.33
  10   4  -1    0.05    0.32
 -10  -4   1   -0.42    0.28
 -10  -4   1    0.13    0.36
   9   4  -1   -0.05    0.31
   9   4  -1    0.27    0.31
  -9  -4   1    0.20    0.35
  -9  -4   1    0.19    0.28
   8   4  -1    4.81    0.67
   8   4  -1    6.23    0.46
   8   4  -1    5.35    0.64
  -8  -4   1    6.15    0.53
  -8  -4   1    6.14    0.77
  -8  -4   1    5.05    0.66
   7   4  -1   31.65    1.48
   7   4  -1   25.22    1.52
  -7  -4   1   28.93    1.52
  -7  -4   1   28.31    1.59
  -7  -4   1   30.19    1.33
   6   4  -1   13.26    0.90
   6   4  -1   12.95    0.81
  -6  -4   1   14.21    0.76
  -6  -4   1   12.90    0.84
  -6  -4   1   13.75    0.95
   5   4  -1    1.65    0.33
   5   4  -1    1.06    0.26
  -5  -4   1    1.95    0.28
  -5  -4   1    2.35    0.34
  -5  -4   1    2.04    0.38
   4   4  -1    1.04    0.21
   4   4  -1    0.84    0.20
   4   4  -1    0.68    0.23
  -4  -4   1    1.38    0.23
  -4  -4   1    1.27    0.24
  -4  -4   1    1.31    0.21
   3   4  -1   35.08    1.57
   3   4  -1   35.73    1.52
   3   4  -1   36.39    1.51
  -3  -4   1   36.04    1.59
  -3  -4   1   37.14    1.43
  -3  -4   1   35.14    1.61
  -3  -4   1   35.49    1.50
  -3  -4   1   34.96    1.50
   2   4  -1   82.40    3.11
   2   4  -1   79.97    3.17
   2   4  -1   80.35    3.13
  -2  -4   1   84.89    3.20
  -2  -4   1   80.27    3.11
  -2  -4   1   81.72    2.98
  -2  -4   1   81.29    3.12
  -2  -4   1   77.50    3.19
   1   4  -1   22.38    0.96
   1   4  -1   21.76    0.83
   1   4  -1   21.58    0.94
   1   4  -1   22.05    0.98
   1   4  -1   20.44    0.88
  -1  -4   1   22.11    0.95
  -1  -4   1   20.25    0.96
  -1  -4   1   21.41    0.83
  -1  -4   1   20.72    0.85
  -1  -4   1   19.79    0.95
   0   4  -1  105.48    3.93
   0   4  -1  101.58    3.81
   0   4  -1  105.24    3.94
   0   4  -1  111.22    3.96
   0   4  -1  105.82    3.70
   0  -4   1  104.95    3.95
   0  -4   1   99.90    3.93
   0  -4   1  101.62    3.69
   0  -4   1  109.01    3.94
  -1   4  -1    1.92    0.20
  -1   4  -1    1.92    0.19
  -1   4  -1    1.78    0.20
  -1   4  -1    1.94    0.25
  -1   4  -1    1.82    0.12
  -1   4  -1    2.03    0.12
   1  -4   1    1.85    0.13
   1  -4   1    2.29    0.26
   1  -4   1    1.62    0.13
   1  -4   1    2.35    0.22
  -2   4  -1   88.37    3.18
  -2   4  -1   83.56    3.21
  -2   4  -1   83.57    3.05
   2  -4   1   83.61    3.21
   2  -4   1   86.60    3.17
   2  -4   1   80.48    3.05
  -3   4  -1    0.11    0.13
  -3   4  -1    0.05    0.11
   3  -4   1    0.13    0.12
   3  -4   1    0.38    0.15
  -4   4  -1   37.31    1.34
  -4   4  -1   35.66    1.44
  -4   4  -1   33.83    1.63
  -4   4  -1   35.76    1.48
  -4   4  -1   33.20    1.33
   4  -4   1   33.86    1.53
   4  -4   1   36.52    1.38
   4  -4   1   35.43    1.36
  -5   4  -1    2.69    0.26
  -5   4  -1    3.42    0.34
  -5   4  -1    2.03    0.37
  -5   4  -1    2.88    0.21
   5  -4   1    2.93    0.23
   5  -4   1    2.69    0.25
   5  -4   1    2.39    0.36
  -6   4  -1    8.86    0.47
  -6   4  -1    7.78    0.50
  -6   4  -1    7.43    0.75
  -6   4  -1    7.45    0.42
   6  -4   1    8.00    0.62
   6  -4   1    8.22    0.47
  -7   4  -1    1.03    0.11
  -7   4  -1    0.77    0.34
   7  -4   1    0.98    0.21
   7  -4   1    1.01    0.30
  -8   4  -1   15.30    1.15
   8  -4   1   15.35    1.04
   8  -4   1   16.54    0.88
  -9   4  -1    0.50    0.38
   9  -4   1    0.72    0.35
   9  -4   1    1.18    0.29
 -10   4  -1    0.57    0.40
  10  -4   1    0.60    0.39
  10  -4   1   -0.02    0.21
  10   3  -1    1.36    0.42
  10   3  -1    1.07    0.43
 -10  -3   1    0.79    0.41
 -10  -3   1    0.80    0.43
   9   3  -1    1.12    0.38
   9   3  -1    0.44    0.32
  -9  -3   1    0.82    0.40
  -9  -3   1    0.76    0.37
   8   3  -1    0.11    0.12
   8   3  -1   -0.06    0.21
   8   3  -1   -0.18    0.20
  -8  -3   1   -0.13    0.12
  -8  -3   1    0.13    0.29
  -8  -3   1    0.34    0.29
   7   3  -1    6.87    0.67
   7   3  -1    7.03    0.73
  -7  -3   1    6.34    0.69
  -7  -3   1    6.97    0.75
  -7  -3   1    6.17    0.44
   6   3  -1  121.58    4.99
   6   3  -1  120.86    4.78
  -6  -3   1  127.83    4.67
  -6  -3   1  133.62    5.06
  -6  -3   1  121.36    5.03
   5   3  -1    1.73    0.29
   5   3  -1    2.30    0.35
  -5  -3   1    2.03    0.33
  -5  -3   1    2.13    0.26
  -5  -3   1    2.05    0.36
   4   3  -1   18.26    0.82
   4   3  -1   15.35    0.82
   4   3  -1   16.28    0.90
  -4  -3   1   17.34    0.93
  -4  -3   1   17.60    0.81
  -4  -3   1   17.46    0.88
   3   3  -1   12.91    0.64
   3   3  -1   12.56    0.63
   3   3  -1   13.23    0.68
   3   3  -1   12.30    0.70
  -3  -3   1   12.76    0.66
  -3  -3   1   12.41    0.63
  -3  -3   1   13.98    0.72
  -3  -3   1   13.37    0.61
   2   3  -1    3.18    0.32
   2   3  -1    3.10    0.23
   2   3  -1    3.24    0.29
   2   3  -1    3.09    0.30
  -2  -3   1    3.14    0.31
  -2  -3   1    2.69    0.27
  -2  -3   1    3.22    0.31
  -2  -3   1    2.86    0.19
  -2  -3   1    2.40    0.21
   1   3  -1    0.26    0.07
   1   3  -1    0.69    0.13
   1   3  -1    0.28    0.10
   1   3  -1    0.30    0.06
   1   3  -1    0.45    0.11
  -1  -3   1    0.53    0.12
  -1  -3   1    0.52    0.09
  -1  -3   1    0.37    0.11
  -1  -3   1    0.41    0.10
  -1  -3   1    0.15    0.09
  -1  -3   1    0.37    0.06
   0   3  -1   67.84    2.36
   0   3  -1   70.23    2.52
   0   3  -1   66.19    2.49
   0   3  -1   64.60    2.40
   0   3  -1   63.88    2.50
   0  -3   1   64.61    2.51
   0  -3   1   63.85    2.35
   0  -3   1   68.10    2.51
  -1   3  -1   72.18    2.61
  -1   3  -1   74.66    2.71
  -1   3  -1   73.55    2.69
  -1   3  -1   76.69    2.78
  -1   3  -1   73.76    2.70
   1  -3   1   70.74    2.70
   1  -3   1   71.47    2.77
   1  -3   1   69.55    2.70
   1  -3   1   75.52    2.62
   1  -3   1   75.60    2.71
  -2   3  -1    4.10    0.29
  -2   3  -1    3.83    0.28
  -2   3  -1    4.18    0.28
   2  -3   1    3.90    0.28
   2  -3   1    4.81    0.29
   2  -3   1    4.04    0.29
  -3   3  -1    4.51    0.29
  -3   3  -1    4.43    0.31
  -3   3  -1    5.14    0.34
  -3   3  -1    4.44    0.34
  -3   3  -1    4.68    0.21
  -3   3  -1    4.50    0.36
  -3   3  -1    3.98    0.21
   3  -3   1    4.48    0.22
   3  -3   1    4.31    0.33
   3  -3   1    4.46    0.23
  -4   3  -1    0.26    0.08
  -4   3  -1    0.11    0.15
  -4   3  -1    0.28    0.10
  -4   3  -1    0.13    0.08
  -4   3  -1    0.18    0.11
   4  -3   1    0.04    0.04
   4  -3   1    0.18    0.09
   4  -3   1    0.60    0.18
  -5   3  -1    1.64    0.22
  -5   3  -1    1.58    0.17
  -5   3  -1    1.44    0.31
  -5   3  -1    1.38    0.18
   5  -3   1    0.85    0.17
   5  -3   1    1.33    0.19
   5  -3   1    1.11    0.25
  -6   3  -1    0.43    0.24
  -6   3  -1    0.33    0.15
  -6   3  -1    0.64    0.16
  -6   3  -1    0.48    0.09
   6  -3   1    0.30    0.16
   6  -3   1    0.61    0.23
   6  -3   1    0.34    0.15
  -7   3  -1    0.34    0.18
  -7   3  -1    0.24    0.12
  -7   3  -1    0.54    0.27
   7  -3   1    0.24    0.22
   7  -3   1    0.23    0.19
   7  -3   1   -0.05    0.14
  -8   3  -1    0.90    0.37
   8  -3   1    0.23    0.27
   8  -3   1    0.03    0.17
  -9   3  -1    0.38    0.35
   9  -3   1    0.09    0.22
   9  -3   1   -0.16    0.23
  10  -3   1    0.82    0.30
  10  -3   1    0.99    0.42
  10   2  -1    0.11    0.30
  10   2  -1    0.15    0.29
 -10  -2   1    0.28    0.35
 -10  -2   1   -0.63    0.20
   9   2  -1   -0.07    0.23
   9   2  -1    0.16    0.27
  -9  -2   1   -0.14    0.24
  -9  -2   1   -0.04    0.25
   8   2  -1   -0.26    0.19
   8   2  -1   -0.13    0.22
  -8  -2   1   -0.23    0.21
  -8  -2   1   -0.15    0.25
   7   2  -1    0.13    0.22
   7   2  -1   -0.06    0.08
   7   2  -1    0.03    0.21
   7   2  -1   -0.12    0.08
  -7  -2   1   -0.48    0.18
  -7  -2   1   -0.31    0.18
  -7  -2   1    0.01    0.11
   6   2  -1    0.20    0.18
   6   2  -1    0.30    0.21
  -6  -2   1    0.35    0.22
  -6  -2   1    0.08    0.10
  -6  -2   1   -0.02    0.19
   5   2  -1    1.33    0.26
   5   2  -1    1.68    0.31
  -5  -2   1    1.53    0.19
  -5  -2   1    1.62    0.32
  -5  -2   1    1.49    0.30
   4   2  -1   45.80    1.99
   4   2  -1   45.57    1.89
  -4  -2   1   45.90    2.01
  -4  -2   1   46.61    2.00
  -4  -2   1   49.79    1.82
   3   2  -1    7.23    0.47
   3   2  -1    8.13    0.40
   3   2  -1    7.50    0.42
   3   2  -1    7.37    0.49
   3   2  -1    7.44    0.46
  -3  -2   1    6.62    0.47
  -3  -2   1    7.68    0.46
  -3  -2   1    7.22    0.39
  -3  -2   1    7.60    0.48
   2   2  -1   16.23    0.76
   2   2  -1   16.21    0.69
   2   2  -1   15.85    0.72
   2   2  -1   15.42    0.67
   2   2  -1   15.16    0.73
  -2  -2   1   15.03    0.75
  -2  -2   1   15.74    0.71
  -2  -2   1   15.07    0.68
  -2  -2   1   16.33    0.75
   1   2  -1  136.59    5.14
   1   2  -1  142.50    5.16
   1   2  -1  140.86    5.01
   1   2  -1  130.51    5.16
  -1  -2   1  141.47    5.15
  -1  -2   1  139.44    4.94
  -1  -2   1  134.91    5.15
  -1  -2   1  140.29    5.17
  -1  -2   1  136.12    5.01
   0   2  -1  217.83    7.79
   0   2  -1  218.67    7.70
   0   2  -1  200.14    7.63
   0  -2   1  226.77    7.65
   0  -2   1  222.34    7.80
   0  -2   1  216.18    7.38
   0  -2   1  185.86    7.78
  -1   2  -1  299.94   10.55
  -1   2  -1  301.76   11.24
  -1   2  -1  307.46   11.01
  -1   2  -1  302.50   11.00
  -1   2  -1  307.06   11.26
   1  -2   1  314.72   10.56
   1  -2   1  292.49   11.28
   1  -2   1  320.38   11.07
   1  -2   1  330.01   11.02
   1  -2   1  303.06   11.30
  -2   2  -1    1.53    0.19
  -2   2  -1    1.76    0.17
  -2   2  -1    1.77    0.10
  -2   2  -1    1.77    0.19
  -2   2  -1    2.01    0.20
   2  -2   1    1.79    0.11
   2  -2   1    1.86    0.11
   2  -2   1    1.72    0.19
   2  -2   1    1.85    0.19
  -3   2  -1   22.08    0.87
  -3   2  -1   19.95    1.00
  -3   2  -1   20.68    0.86
  -3   2  -1   22.95    0.97
  -3   2  -1   21.09    0.86
  -3   2  -1   21.42    0.89
  -3   2  -1   21.64    0.91
   3  -2   1   20.78    0.87
   3  -2   1   21.02    0.94
  -4   2  -1    5.78    0.30
  -4   2  -1    5.47    0.34
  -4   2  -1    5.87    0.34
  -4   2  -1    6.14    0.48
  -4   2  -1    5.89    0.35
   4  -2   1    5.45    0.34
   4  -2   1    5.40    0.41
   4  -2   1    6.02    0.37
  -5   2  -1    2.67    0.39
  -5   2  -1    3.04    0.27
  -5   2  -1    2.65    0.17
  -5   2  -1    2.48    0.27
   5  -2   1    2.70    0.28
   5  -2   1    2.84    0.36
   5  -2   1    2.80    0.30
  -6   2  -1    1.96    0.38
  -6   2  -1    1.88    0.22
  -6   2  -1    1.90    0.27
   6  -2   1    1.88    0.33
   6  -2   1    2.16    0.30
   6  -2   1    2.25    0.32
  -7   2  -1   15.05    0.70
  -7   2  -1   13.41    0.97
  -7   2  -1   14.01    0.82
   7  -2   1   15.35    0.83
   7  -2   1   13.57    0.89
   7  -2   1   15.06    0.87
  -8   2  -1    0.77    0.35
  -8   2  -1    0.48    0.25
   8  -2   1    0.40    0.23
   8  -2   1    0.64    0.30
  -9   2  -1    1.21    0.40
   9  -2   1    1.30    0.39
   9  -2   1    0.78    0.29
 -10   2  -1    0.41    0.37
  10  -2   1    0.51    0.34
  10  -2   1    0.30    0.28
  10   1  -1    0.05    0.30
  10   1  -1    0.01    0.28
 -10  -1   1    0.67    0.37
   9   1  -1    0.09    0.26
   9   1  -1   -0.19    0.21
  -9  -1   1    0.04    0.27
  -9  -1   1   -0.18    0.24
   8   1  -1    2.55    0.46
   8   1  -1    2.46    0.46
  -8  -1   1    2.16    0.48
  -8  -1   1    3.28    0.53
   7   1  -1   33.91    1.65
   7   1  -1   34.91    1.70
  -7  -1   1   34.71    1.34
  -7  -1   1   35.54    1.73
  -7  -1   1   34.51    1.78
   6   1  -1    0.16    0.06
   6   1  -1    0.12    0.05
   6   1  -1    0.05    0.17
   6   1  -1   -0.08    0.14
  -6  -1   1    0.09    0.08
  -6  -1   1   -0.01    0.16
  -6  -1   1    0.07    0.19
   5   1  -1    8.31    0.57
   5   1  -1    7.89    0.54
   5   1  -1    7.65    0.37
  -5  -1   1    7.76    0.39
  -5  -1   1    7.83    0.59
  -5  -1   1    8.37    0.59
   4   1  -1   35.22    1.53
   4   1  -1   32.47    1.45
   4   1  -1   38.68    1.59
  -4  -1   1   33.85    1.54
  -4  -1   1   34.27    1.56
  -4  -1   1   36.03    1.48
  -4  -1   1   34.76    1.34
   3   1  -1   17.57    0.82
   3   1  -1   16.27    0.81
   3   1  -1   15.95    0.73
   3   1  -1   15.32    0.77
  -3  -1   1   16.04    0.74
  -3  -1   1   15.77    0.66
  -3  -1   1   16.36    0.81
  -3  -1   1   15.30    0.79
  -3  -1   1   16.42    0.79
   2   1  -1   11.61    0.50
   2   1  -1   10.99    0.56
   2   1  -1   11.68    0.53
   2   1  -1   11.65    0.57
   2   1  -1   11.65    0.59
  -2  -1   1   11.97    0.50
  -2  -1   1   12.26    0.58
  -2  -1   1   11.22    0.58
  -2  -1   1   12.11    0.53
  -2  -1   1   12.01    0.58
   1   1  -1  649.76   24.31
   1   1  -1  632.65   23.66
  -1  -1   1  658.75   24.70
  -1  -1   1  690.37   23.73
  -1  -1   1  629.70   24.36
  -1  -1   1  686.23   24.18
  -1   1  -1  117.23    4.42
   1  -1   1  123.29    4.55
   1  -1   1  128.49    4.28
   1  -1   1  125.45    4.43
  -2   1  -1   23.16    0.90
  -2   1  -1   23.94    0.94
  -2   1  -1   22.38    0.88
  -2   1  -1   21.14    0.89
  -2   1  -1   23.91    0.91
   2  -1   1   22.13    0.93
   2  -1   1   23.40    0.88
   2  -1   1   22.97    0.90
   2  -1   1   22.57    0.90
  -3   1  -1   61.49    2.22
  -3   1  -1   58.08    2.30
  -3   1  -1   57.21    2.18
  -3   1  -1   61.53    2.30
  -3   1  -1   62.01    2.32
  -3   1  -1   60.86    2.44
   3  -1   1   58.82    2.30
   3  -1   1   62.32    2.32
   3  -1   1   58.65    2.18
   3  -1   1   58.84    2.30
  -4   1  -1   30.10    1.26
  -4   1  -1   31.41    1.26
  -4   1  -1   29.17    1.11
  -4   1  -1   27.97    1.36
   4  -1   1   30.74    1.28
   4  -1   1   28.03    1.28
   4  -1   1   29.79    1.25
  -5   1  -1    0.27    0.05
  -5   1  -1    0.12    0.12
  -5   1  -1    0.01    0.16
   5  -1   1    0.25    0.15
   5  -1   1    0.31    0.13
   5  -1   1   -0.03    0.12
  -6   1  -1    2.07    0.31
  -6   1  -1    0.72    0.27
   6  -1   1    1.26    0.24
   6  -1   1    1.42    0.29
   6  -1   1    1.91    0.31
  -7   1  -1   -0.05    0.19
  -7   1  -1    0.18    0.12
  -7   1  -1    0.23    0.18
   7  -1   1    0.14    0.16
   7  -1   1    0.07    0.20
   7  -1   1    0.75    0.24
  -8   1  -1   -0.09    0.23
  -8   1  -1   -0.02    0.18
   8  -1   1    0.16    0.22
   8  -1   1   -0.05    0.17
  -9   1  -1    1.21    0.42
   9  -1   1    0.69    0.32
   9  -1   1    1.03    0.37
 -10   1  -1   -0.08    0.27
  10  -1   1   -0.38    0.24
  10  -1   1   -0.04    0.20
  10   0  -1    0.36    0.33
  10   0  -1    0.62    0.36
 -10   0   1    0.24    0.36
   9   0  -1   -0.10    0.25
   9   0  -1    0.04    0.24
  -9   0   1   -0.41    0.23
  -9   0   1    0.07    0.30
   8   0  -1    0.37    0.23
   8   0  -1    0.30    0.25
  -8   0   1    0.03    0.26
  -8   0   1    0.01    0.21
   7   0  -1    0.20    0.20
   7   0  -1   -0.05    0.20
  -7   0   1    0.17    0.24
  -7   0   1   -0.28    0.15
   6   0  -1   12.51    0.77
   6   0  -1   11.89    0.76
  -6   0   1   13.48    0.87
  -6   0   1   12.56    0.80
  -6   0   1   12.87    0.51
   5   0  -1   11.53    0.70
   5   0  -1   13.90    0.78
   5   0  -1   12.35    0.72
  -5   0   1   12.68    0.74
  -5   0   1   12.48    0.51
  -5   0   1   13.03    0.79
   4   0  -1   10.64    0.42
   4   0  -1   11.59    0.66
   4   0  -1   11.07    0.61
   4   0  -1   11.43    0.63
   4   0  -1   11.11    0.42
  -4   0   1   11.88    0.65
  -4   0   1   10.35    0.66
  -4   0   1   11.74    0.45
   3   0  -1   56.55    2.20
   3   0  -1   54.64    2.06
   3   0  -1   55.37    2.26
   3   0  -1   56.23    2.29
   3   0  -1   62.70    2.36
  -3   0   1   59.02    2.07
  -3   0   1   57.62    2.21
  -3   0   1   56.67    2.28
  -3   0   1   57.39    2.33
  -3   0   1   57.46    2.27
   2   0  -1   -0.17    0.07
   2   0  -1   -0.22    0.06
   2   0  -1   -0.16    0.07
   2   0  -1   -0.20    0.03
   2   0  -1   -0.11    0.08
  -2   0   1   -0.22    0.02
  -2   0   1   -0.27    0.06
  -2   0   1   -0.19    0.07
  -2   0   1   -0.19    0.08
  -2   0   1   -0.25    0.06
   1   0  -1  294.70    9.18
   1   0  -1  227.07    9.35
  -1   0   1  284.12    9.50
  -1   0   1  212.88    9.29
   0   0  -1   -0.01    0.01
   0   0  -1   -0.01    0.01
   0   0  -1   -0.01    0.01
   0   0  -1    0.00    0.02
   0   0  -1    0.01    0.01
   0   0  -1   -0.01    0.00
   0   0   1    0.00    0.02
   0   0   1    0.00    0.01
   0   0   1   -0.01    0.01
   0   0   1   -0.02    0.01
   0   0   1    0.00    0.01
   0   0   1   -0.01    0.01
  -2   0  -1   47.56    1.76
  -2   0  -1   46.14    1.75
  -2   0  -1   47.38    1.87
   2   0   1   48.01    1.86
   2   0   1   48.65    1.83
   2   0   1   50.34    1.87
   2   0   1   50.62    1.77
  -3   0  -1   67.55    2.46
  -3   0  -1   65.42    2.50
  -3   0  -1   64.56    2.48
  -3   0  -1   62.33    2.56
  -3   0  -1   65.15    2.32
   3   0   1   59.66    2.43
   3   0   1   62.74    2.32
   3   0   1   61.59    2.47
   3   0   1   66.51    2.50
  -4   0  -1    0.27    0.12
  -4   0  -1    0.08    0.12
  -4   0  -1    0.02    0.10
   4   0   1    0.07    0.11
   4   0   1    0.10    0.05
   4   0   1    0.05    0.11
   4   0   1    0.14    0.12
  -5   0  -1    2.27    0.30
  -5   0  -1    2.30    0.35
   5   0   1    3.10    0.36
   5   0   1    2.65    0.31
   5   0   1    3.38    0.37
   5   0   1    2.89    0.16
  -6   0  -1    1.09    0.29
   6   0   1    1.05    0.08
   6   0   1    1.08    0.26
   6   0   1    1.34    0.29
   6   0   1    1.70    0.31
  -7   0  -1    5.88    0.59
  -7   0  -1    4.92    0.61
   7   0   1    6.11    0.62
   7   0   1    5.84    0.59
   7   0   1    7.00    0.69
  -8   0  -1    4.82    0.59
  -8   0  -1    5.43    0.69
  -8   0  -1    4.26    0.33
   8   0   1    3.67    0.51
   8   0   1    4.71    0.59
  -9   0  -1    0.04    0.24
  -9   0  -1    0.20    0.28
   9   0   1    0.50    0.30
   9   0   1   -0.10    0.19
 -10   0  -1    2.06    0.53
  10   0   1    2.55    0.49
  10   0   1    2.03    0.50
  10  -1  -1    0.01    0.28
  10  -1  -1    0.23    0.29
 -10   1   1    0.06    0.33
   9  -1  -1   -0.02    0.21
   9  -1  -1    0.55    0.31
  -9   1   1   -0.16    0.24
   8  -1  -1    8.18    0.78
   8  -1  -1    7.79    0.75
  -8   1   1    8.98    0.91
  -8   1   1    8.39    0.69
   7  -1  -1    6.26    0.62
   7  -1  -1    7.07    0.67
  -7   1   1    7.54    0.77
  -7   1   1    6.65    0.64
   6  -1  -1    2.74    0.39
   6  -1  -1    2.74    0.35
   6  -1  -1    2.88    0.41
  -6   1   1    2.01    0.38
  -6   1   1    2.29    0.34
   5  -1  -1    5.09    0.48
   5  -1  -1    4.20    0.43
   5  -1  -1    4.78    0.39
  -5   1   1    4.46    0.43
  -5   1   1    4.82    0.52
   4  -1  -1    0.92    0.19
   4  -1  -1    0.73    0.16
   4  -1  -1    0.90    0.19
  -4   1   1    0.95    0.06
  -4   1   1    0.82    0.18
  -4   1   1    1.00    0.06
  -4   1   1    0.86    0.21
   3  -1  -1   29.67    1.27
   3  -1  -1   30.83    1.28
   3  -1  -1   31.53    1.38
  -3   1   1   31.51    1.29
  -3   1   1   32.13    1.28
  -3   1   1   27.73    1.33
  -3   1   1   31.06    1.28
   2  -1  -1   31.15    1.26
   2  -1  -1   29.51    1.19
   2  -1  -1   29.12    1.19
   2  -1  -1   28.56    1.17
  -2   1   1   28.56    1.17
  -2   1   1   30.76    1.07
  -2   1   1   27.99    1.18
  -2   1   1   29.31    1.18
  -2   1   1   30.07    1.06
  -2   1   1   27.64    1.23
   1  -1  -1    1.86    0.15
   1  -1  -1    2.67    0.12
   1  -1  -1    2.09    0.15
   1  -1  -1    2.16    0.13
   1  -1  -1    2.42    0.15
  -1   1   1    2.16    0.17
  -1   1   1    2.30    0.17
   0  -1  -1   -0.22    0.01
   0  -1  -1   -0.24    0.01
   0  -1  -1   -0.23    0.01
   0   1   1   -0.24    0.01
   0   1   1   -0.23    0.02
   0   1   1   -0.22    0.01
   0   1   1   -0.24    0.01
  -2  -1  -1  121.07    4.62
  -2  -1  -1  115.91    4.65
  -2  -1  -1  122.32    4.61
   2   1   1  125.66    4.62
   2   1   1  129.81    4.43
   2   1   1  123.63    4.61
   2   1   1  125.01    4.48
  -3  -1  -1   10.65    0.59
  -3  -1  -1   10.34    0.58
  -3  -1  -1   11.62    0.58
  -3  -1  -1   11.70    0.57
   3   1   1   11.04    0.59
   3   1   1   12.80    0.59
   3   1   1   10.82    0.57
   3   1   1   11.29    0.49
  -4  -1  -1   46.11    1.93
  -4  -1  -1   45.86    1.96
   4   1   1   46.61    1.73
   4   1   1   48.67    1.95
   4   1   1   45.47    1.91
   4   1   1   43.83    1.86
  -5  -1  -1    4.02    0.42
  -5  -1  -1    3.16    0.40
   5   1   1    2.11    0.31
   5   1   1    3.28    0.21
   5   1   1    3.00    0.37
   5   1   1    3.47    0.40
  -6  -1  -1    1.28    0.27
  -6  -1  -1    1.13    0.19
  -6  -1  -1    1.14    0.29
   6   1   1    0.95    0.27
   6   1   1    1.21    0.14
   6   1   1    0.79    0.25
  -7  -1  -1    2.24    0.28
  -7  -1  -1    3.13    0.48
  -7  -1  -1    2.49    0.45
   7   1   1    2.84    0.18
   7   1   1    3.24    0.46
   7   1   1    3.33    0.44
  -8  -1  -1    0.47    0.31
  -8  -1  -1    0.78    0.18
  -8  -1  -1    0.83    0.32
   8   1   1    0.32    0.24
   8   1   1    0.46    0.26
  -9  -1  -1    0.05    0.29
  -9  -1  -1    0.25    0.26
   9   1   1    0.63    0.31
   9   1   1    0.08    0.29
 -10  -1  -1    1.02    0.44
  10   1   1    0.78    0.39
  10   1   1    1.68    0.45
  10  -2  -1    0.68    0.33
  10  -2  -1   -0.19    0.31
 -10   2   1    0.49    0.42
   9  -2  -1   -0.11    0.26
   9  -2  -1    0.03    0.19
  -9   2   1   -0.03    0.26
   8  -2  -1   16.00    0.94
   8  -2  -1   12.44    0.94
  -8   2   1   14.78    1.09
  -8   2   1   14.35    0.91
   7  -2  -1    1.07    0.32
   7  -2  -1    1.56    0.31
   7  -2  -1    1.69    0.38
  -7   2   1    1.88    0.34
  -7   2   1    1.78    0.41
   6  -2  -1    3.06    0.37
   6  -2  -1    4.02    0.47
   6  -2  -1    3.34    0.44
  -6   2   1    3.38    0.49
  -6   2   1    3.16    0.38
   5  -2  -1   19.26    0.99
   5  -2  -1   21.55    0.99
   5  -2  -1   17.75    0.92
  -5   2   1   18.62    1.05
  -5   2   1   19.25    0.94
  -5   2   1   19.23    0.73
   4  -2  -1   11.73    0.63
   4  -2  -1   11.08    0.61
   4  -2  -1   11.53    0.66
  -4   2   1   12.04    0.73
  -4   2   1   12.16    0.62
  -4   2   1   12.41    0.49
   3  -2  -1    2.04    0.22
   3  -2  -1    2.03    0.24
   3  -2  -1    2.49    0.30
   3  -2  -1    1.93    0.20
  -3   2   1    1.93    0.20
  -3   2   1    1.85    0.13
  -3   2   1    1.92    0.24
  -3   2   1    1.92    0.12
  -3   2   1    1.78    0.26
  -3   2   1    2.51    0.23
   2  -2  -1    1.73    0.20
   2  -2  -1    2.22    0.16
   2  -2  -1    1.68    0.13
   2  -2  -1    2.03    0.17
   2  -2  -1    2.06    0.23
  -2   2   1    2.09    0.21
  -2   2   1    1.84    0.15
  -2   2   1    1.86    0.22
  -2   2   1    2.31    0.16
  -2   2   1    1.95    0.14
  -2   2   1    2.22    0.14
   1  -2  -1  218.34    7.54
   1  -2  -1  227.70    7.86
   1  -2  -1  212.00    7.86
   1  -2  -1  220.62    7.55
  -1   2   1  216.52    7.85
  -1   2   1  173.86    7.52
  -1   2   1  209.20    7.54
  -1   2   1  211.70    7.72
  -1   2   1  207.82    7.59
   0  -2  -1   67.68    2.95
   0  -2  -1   92.09    2.97
   0   2   1   70.67    2.95
   0   2   1   88.72    2.91
  -1  -2  -1  194.90    6.95
  -1  -2  -1  180.77    6.76
  -1  -2  -1  187.60    6.95
  -1  -2  -1  190.14    6.78
   1   2   1  181.90    6.76
   1   2   1  194.60    6.95
  -2  -2  -1  220.51    7.86
  -2  -2  -1  217.66    8.10
  -2  -2  -1  210.97    7.85
  -2  -2  -1  215.93    8.13
  -2  -2  -1  224.56    8.09
   2   2   1  216.04    8.08
   2   2   1  220.89    8.10
  -3  -2  -1   17.94    0.80
  -3  -2  -1   18.33    0.80
  -3  -2  -1   17.89    0.86
  -3  -2  -1   17.08    0.83
  -3  -2  -1   18.39    0.87
   3   2   1   17.80    0.77
   3   2   1   18.82    0.86
   3   2   1   19.47    0.88
   3   2   1   16.74    0.81
  -4  -2  -1   17.33    0.78
  -4  -2  -1   17.86    0.90
  -4  -2  -1   15.75    0.85
   4   2   1   17.48    0.89
   4   2   1   16.09    0.86
   4   2   1   17.83    0.75
   4   2   1   17.64    0.85
  -5  -2  -1   11.83    0.60
  -5  -2  -1   10.98    0.69
  -5  -2  -1   10.44    0.69
   5   2   1   11.24    0.68
   5   2   1   10.55    0.68
   5   2   1   12.10    0.56
  -6  -2  -1   63.24    2.81
  -6  -2  -1   68.04    2.86
  -6  -2  -1   67.95    2.59
   6   2   1   68.27    2.81
   6   2   1   67.07    2.73
   6   2   1   65.09    2.50
  -7  -2  -1    6.79    0.69
  -7  -2  -1    6.90    0.47
  -7  -2  -1    6.48    0.68
   7   2   1    6.39    0.66
   7   2   1    7.38    0.40
   7   2   1    8.07    0.64
  -8  -2  -1    7.22    0.47
  -8  -2  -1    6.31    0.72
  -8  -2  -1    5.83    0.70
   8   2   1    6.26    0.70
   8   2   1    7.60    0.75
  -9  -2  -1    0.79    0.35
  -9  -2  -1    1.10    0.39
   9   2   1    0.74    0.34
   9   2   1    1.01    0.35
 -10  -2  -1    0.49    0.36
 -10  -2  -1    0.38    0.34
  10   2   1    0.52    0.33
  10   2   1    1.05    0.41
  10  -3  -1    0.67    0.39
  10  -3  -1   -0.14    0.22
 -10   3   1    0.39    0.42
   9  -3  -1    1.82    0.47
   9  -3  -1    2.07    0.42
  -9   3   1    1.11    0.46
   8  -3  -1    0.01    0.20
   8  -3  -1    0.08    0.23
  -8   3   1    0.00    0.28
   7  -3  -1    2.55    0.43
   7  -3  -1    2.67    0.37
  -7   3   1    3.41    0.55
  -7   3   1    2.46    0.36
   6  -3  -1    0.38    0.19
   6  -3  -1    0.46    0.23
   6  -3  -1    0.38    0.18
  -6   3   1    0.17    0.15
  -6   3   1    0.48    0.09
  -6   3   1    0.56    0.26
   5  -3  -1    0.71    0.17
   5  -3  -1    0.82    0.23
   5  -3  -1    0.69    0.18
  -5   3   1    0.92    0.19
  -5   3   1    1.07    0.13
  -5   3   1    0.43    0.23
   4  -3  -1    5.45    0.43
   4  -3  -1    4.80    0.34
   4  -3  -1    5.66    0.37
  -4   3   1    4.50    0.47
  -4   3   1    4.87    0.34
  -4   3   1    5.32    0.26
  -4   3   1    5.61    0.30
   3  -3  -1    1.47    0.16
   3  -3  -1    1.39    0.17
   3  -3  -1    1.21    0.17
   3  -3  -1    1.52    0.24
   3  -3  -1    1.63    0.24
  -3   3   1    1.60    0.17
  -3   3   1    1.42    0.17
  -3   3   1    1.21    0.23
  -3   3   1    1.45    0.16
   2  -3  -1   43.48    1.78
   2  -3  -1   46.40    1.75
   2  -3  -1   43.79    1.73
   2  -3  -1   49.03    1.88
  -2   3   1   47.55    1.74
  -2   3   1   44.87    1.86
  -2   3   1   45.18    1.74
  -2   3   1   43.72    1.81
  -2   3   1   43.68    1.74
  -2   3   1   48.18    1.81
   1  -3  -1  234.26    8.54
   1  -3  -1  227.37    8.70
   1  -3  -1  240.16    8.58
   1  -3  -1  243.37    8.85
  -1   3   1  245.16    8.55
  -1   3   1  236.06    8.57
  -1   3   1  242.86    8.70
  -1   3   1  238.46    8.16
  -1   3   1  230.12    8.52
  -1   3   1  237.55    8.76
  -1   3   1  238.26    8.85
   0  -3  -1    9.14    0.43
   0  -3  -1    8.41    0.41
   0  -3  -1    8.60    0.42
   0  -3  -1    9.27    0.46
   0   3   1    8.33    0.42
   0   3   1    8.93    0.37
   0   3   1    8.98    0.45
   0   3   1    8.85    0.41
   0   3   1    9.04    0.34
   0   3   1    8.84    0.42
  -1  -3  -1    8.71    0.45
  -1  -3  -1    8.26    0.43
  -1  -3  -1    8.21    0.44
  -1  -3  -1    8.70    0.41
   1   3   1    8.93    0.44
   1   3   1    8.38    0.41
   1   3   1    8.83    0.45
   1   3   1    8.33    0.43
  -2  -3  -1   39.13    1.57
  -2  -3  -1   38.13    1.58
  -2  -3  -1   39.27    1.49
  -2  -3  -1   36.79    1.52
  -2  -3  -1   37.05    1.49
   2   3   1   36.81    1.48
   2   3   1   36.16    1.55
   2   3   1   39.75    1.58
   2   3   1   38.94    1.53
  -3  -3  -1   18.10    0.78
  -3  -3  -1   16.68    0.84
  -3  -3  -1   16.23    0.78
  -3  -3  -1   16.32    0.78
  -3  -3  -1   16.70    0.85
   3   3   1   17.64    0.86
   3   3   1   16.09    0.83
  -4  -3  -1   16.28    0.77
  -4  -3  -1   14.35    0.73
  -4  -3  -1   14.47    0.84
  -4  -3  -1   15.23    0.78
   4   3   1   15.56    0.82
   4   3   1   14.86    0.78
   4   3   1   15.56    0.73
  -5  -3  -1    0.95    0.26
  -5  -3  -1    1.18    0.21
  -5  -3  -1    0.61    0.20
   5   3   1    1.14    0.25
   5   3   1    0.90    0.24
   5   3   1    1.07    0.18
  -6  -3  -1    0.50    0.21
  -6  -3  -1    0.17    0.18
  -6  -3  -1    0.32    0.15
   6   3   1    0.43    0.21
   6   3   1    0.38    0.22
   6   3   1    0.32    0.13
  -7  -3  -1   23.17    1.09
  -7  -3  -1   22.65    1.28
  -7  -3  -1   22.20    1.29
   7   3   1   22.33    1.26
   7   3   1   23.04    1.02
   7   3   1   23.22    1.24
  -8  -3  -1    4.19    0.60
  -8  -3  -1    4.62    0.45
  -8  -3  -1    4.85    0.65
   8   3   1    2.63    0.48
   8   3   1    4.70    0.61
  -9  -3  -1    2.00    0.50
  -9  -3  -1    1.61    0.44
   9   3   1    1.56    0.41
   9   3   1    1.19    0.39
 -10  -3  -1    0.08    0.30
 -10  -3  -1   -0.21    0.29
  10   3   1   -0.34    0.25
  10   3   1    0.20    0.31
  10  -4  -1    0.14    0.38
  10  -4  -1    0.24    0.26
 -10   4   1    0.35    0.40
   9  -4  -1    7.35    0.87
   9  -4  -1    6.64    0.67
  -9   4   1    5.77    0.82
   8  -4  -1    1.59    0.42
   8  -4  -1    0.89    0.28
  -8   4   1    0.01    0.31
   7  -4  -1    0.23    0.19
   7  -4  -1    1.30    0.35
  -7   4   1    0.38    0.29
  -7   4   1    0.71    0.22
   6  -4  -1   24.43    1.32
   6  -4  -1   27.17    1.25
   6  -4  -1   24.84    1.19
  -6   4   1   25.60    1.19
  -6   4   1   25.96    1.42
  -6   4   1   26.66    1.06
   5  -4  -1    0.02    0.12
   5  -4  -1    0.29    0.18
   5  -4  -1   -0.01    0.10
  -5   4   1    0.22    0.08
  -5   4   1    0.17    0.07
  -5   4   1    0.35    0.13
  -5   4   1    0.15    0.19
  -5   4   1    0.35    0.11
   4  -4  -1    3.67    0.27
   4  -4  -1    3.05    0.37
   4  -4  -1    2.95    0.27
  -4   4   1    3.28    0.41
  -4   4   1    3.05    0.24
  -4   4   1    3.16    0.25
   3  -4  -1    0.87    0.19
   3  -4  -1    0.76    0.12
   3  -4  -1    0.54    0.13
  -3   4   1    0.71    0.11
  -3   4   1    0.87    0.12
  -3   4   1    0.53    0.18
  -3   4   1    0.41    0.14
  -3   4   1    0.35    0.16
  -3   4   1    0.73    0.14
   2  -4  -1  197.01    7.24
   2  -4  -1  197.01    7.22
   2  -4  -1  192.53    7.32
  -2   4   1  207.81    7.23
  -2   4   1  194.21    7.52
  -2   4   1  204.59    7.32
  -2   4   1  201.95    6.93
  -2   4   1  198.12    7.32
  -2   4   1  197.55    7.29
  -2   4   1  201.06    7.25
   1  -4  -1   67.99    2.68
   1  -4  -1   74.65    2.72
   1  -4  -1   71.54    2.72
  -1   4   1   71.28    2.70
  -1   4   1   72.26    2.53
  -1   4   1   71.87    2.68
  -1   4   1   71.07    2.75
  -1   4   1   69.33    2.71
  -1   4   1   68.67    2.68
  -1   4   1   76.48    2.73
   0  -4  -1   72.86    2.85
   0  -4  -1   78.04    2.82
   0  -4  -1   72.56    2.86
   0  -4  -1   74.85    2.62
   0  -4  -1   72.47    2.85
   0   4   1   77.23    2.86
   0   4   1   73.59    2.81
   0   4   1   75.65    2.86
   0   4   1   77.91    2.62
   0   4   1   77.39    2.87
   0   4   1   74.88    2.81
  -1  -4  -1   23.04    0.83
  -1  -4  -1   23.76    0.99
  -1  -4  -1   22.25    1.00
  -1  -4  -1   21.51    1.00
  -1  -4  -1   21.51    0.94
   1   4   1   23.02    0.99
   1   4   1   23.90    1.00
   1   4   1   23.17    1.01
   1   4   1   22.93    0.95
  -2  -4  -1   66.19    2.48
  -2  -4  -1   65.58    2.47
  -2  -4  -1   62.35    2.60
  -2  -4  -1   67.12    2.54
  -2  -4  -1   65.87    2.60
   2   4   1   67.89    2.61
   2   4   1   64.06    2.47
   2   4   1   67.29    2.55
   2   4   1   61.49    2.58
  -3  -4  -1   87.17    3.41
  -3  -4  -1   91.23    3.56
  -3  -4  -1   90.19    3.45
  -3  -4  -1   95.45    3.55
  -3  -4  -1   88.69    3.37
   3   4   1   85.03    3.51
  -4  -4  -1   37.94    1.73
  -4  -4  -1   40.92    1.61
  -4  -4  -1   35.50    1.59
  -4  -4  -1   37.80    1.62
   4   4   1   37.08    1.69
  -5  -4  -1   21.14    1.18
  -5  -4  -1   23.16    1.08
  -5  -4  -1   22.17    1.12
   5   4   1   24.26    1.14
   5   4   1   22.91    1.19
  -6  -4  -1   11.88    0.69
  -6  -4  -1   12.41    0.84
  -6  -4  -1   11.46    0.75
   6   4   1   12.01    0.76
   6   4   1    9.32    0.75
  -7  -4  -1    5.52    0.65
  -7  -4  -1    6.93    0.70
  -7  -4  -1    5.61    0.52
   7   4   1    5.73    0.61
   7   4   1    5.16    0.62
  -8  -4  -1    0.27    0.27
  -8  -4  -1    0.73    0.24
  -8  -4  -1    0.92    0.36
   8   4   1    0.60    0.29
   8   4   1    0.54    0.30
  -9  -4  -1   11.69    0.78
  -9  -4  -1   12.39    1.01
  -9  -4  -1   12.86    1.05
   9   4   1   13.89    0.98
   9   4   1   12.71    1.00
 -10  -4  -1   -0.16    0.27
 -10  -4  -1   -0.11    0.33
  10   4   1   -0.09    0.32
  10   4   1    0.04    0.32
   9  -5  -1    0.29    0.22
   9  -5  -1    0.20    0.31
  -9   5   1   -0.04    0.29
   8  -5  -1    7.11    0.54
   8  -5  -1    5.70    0.72
  -8   5   1    4.36    0.70
   7  -5  -1    4.44    0.60
   7  -5  -1    3.56    0.40
  -7   5   1    3.36    0.58
   6  -5  -1    0.79    0.19
   6  -5  -1    0.76    0.20
   6  -5  -1    0.31    0.24
  -6   5   1    0.90    0.14
  -6   5   1    0.74    0.17
  -6   5   1    0.74    0.13
  -6   5   1    1.23    0.20
  -6   5   1    0.64    0.29
   5  -5  -1   15.26    0.90
   5  -5  -1   14.75    0.73
  -5   5   1   15.68    0.75
  -5   5   1   13.49    0.92
  -5   5   1   15.73    0.72
  -5   5   1   16.16    0.72
   4  -5  -1   18.87    0.86
   4  -5  -1   20.05    0.92
   4  -5  -1   19.61    1.02
  -4   5   1   20.06    0.85
  -4   5   1   20.19    0.92
  -4   5   1   20.06    1.05
  -4   5   1   21.01    1.08
   3  -5  -1   12.19    0.56
   3  -5  -1   11.91    0.63
   3  -5  -1   11.22    0.55
   3  -5  -1   12.39    0.70
  -3   5   1   12.31    0.54
  -3   5   1   13.45    0.73
  -3   5   1   12.50    0.54
  -3   5   1   13.20    0.65
  -3   5   1   11.87    0.70
   2  -5  -1    6.87    0.37
   2  -5  -1    8.45    0.39
   2  -5  -1    7.65    0.48
  -2   5   1    7.44    0.48
  -2   5   1    7.95    0.43
  -2   5   1    7.74    0.50
  -2   5   1    8.19    0.37
  -2   5   1    8.05    0.49
  -2   5   1    8.51    0.38
   1  -5  -1   11.73    0.64
   1  -5  -1   12.46    0.62
   1  -5  -1   11.51    0.55
  -1   5   1   11.45    0.61
  -1   5   1   12.46    0.65
  -1   5   1   11.55    0.54
  -1   5   1   11.93    0.54
  -1   5   1   11.56    0.52
  -1   5   1   12.32    0.58
  -1   5   1   13.59    0.65
   0  -5  -1   20.23    0.82
   0  -5  -1   17.78    0.82
   0  -5  -1   19.93    0.84
   0  -5  -1   16.97    0.87
   0  -5  -1   17.50    0.70
   0   5   1   17.21    0.81
   0   5   1   18.95    0.71
   0   5   1   18.75    0.81
   0   5   1   18.17    0.73
   0   5   1   19.04    0.89
   0   5   1   17.69    0.81
  -1  -5  -1    0.10    0.10
  -1  -5  -1    0.15    0.10
  -1  -5  -1   -0.07    0.10
  -1  -5  -1   -0.06    0.11
  -1  -5  -1    0.06    0.05
   1   5   1   -0.02    0.09
   1   5   1    0.04    0.10
   1   5   1    0.14    0.09
  -2  -5  -1    0.01    0.04
  -2  -5  -1   -0.04    0.07
  -2  -5  -1    0.10    0.12
  -2  -5  -1    0.01    0.12
  -2  -5  -1   -0.14    0.07
   2   5   1   -0.14    0.09
   2   5   1   -0.15    0.10
  -3  -5  -1   26.28    1.35
  -3  -5  -1   30.09    1.32
  -3  -5  -1   31.53    1.25
  -3  -5  -1   30.82    1.37
  -3  -5  -1   29.26    1.21
   3   5   1   29.39    1.35
   3   5   1   27.46    1.23
  -4  -5  -1   16.23    0.90
  -4  -5  -1   13.32    0.71
  -4  -5  -1   13.87    0.78
   4   5   1   14.31    0.84
  -5  -5  -1    3.35    0.40
  -5  -5  -1    4.19    0.42
  -5  -5  -1    3.50    0.48
   5   5   1    4.28    0.51
   5   5   1    3.94    0.44
  -6  -5  -1    8.37    0.59
  -6  -5  -1    8.37    0.62
  -6  -5  -1    7.29    0.74
   6   5   1    7.21    0.72
   6   5   1    9.06    0.76
  -7  -5  -1    6.62    0.75
  -7  -5  -1    5.47    0.62
  -7  -5  -1    6.06    0.58
   7   5   1    5.86    0.68
   7   5   1    6.86    0.69
  -8  -5  -1    1.04    0.35
  -8  -5  -1    1.66    0.33
   8   5   1    1.34    0.38
   8   5   1    1.46    0.43
  -9  -5  -1    3.04    0.55
  -9  -5  -1    1.78    0.37
  -9  -5  -1    2.89    0.59
   9   5   1    1.89    0.46
   9   5   1    2.46    0.53
 -10  -5  -1    0.17    0.31
 -10  -5  -1    0.72    0.44
  10   5   1   -0.26    0.28
  10   5   1    0.17    0.33
   9  -6  -1    0.66    0.26
   9  -6  -1    0.62    0.41
  -9   6   1    1.49    0.51
  -9   6   1    0.65    0.32
   8  -6  -1   -0.08    0.14
   8  -6  -1    0.12    0.30
  -8   6   1    0.27    0.33
  -8   6   1    0.59    0.33
   7  -6  -1    1.46    0.41
   7  -6  -1    2.06    0.28
  -7   6   1    1.92    0.43
  -7   6   1    1.59    0.44
   6  -6  -1    5.25    0.61
   6  -6  -1    5.03    0.37
  -6   6   1    5.21    0.61
  -6   6   1    5.84    0.70
  -6   6   1    5.31    0.37
   5  -6  -1    0.13    0.10
   5  -6  -1    0.36    0.12
   5  -6  -1   -0.16    0.15
  -5   6   1    0.14    0.09
  -5   6   1    0.00    0.20
  -5   6   1    0.26    0.18
   4  -6  -1    0.31    0.15
   4  -6  -1    0.07    0.08
   4  -6  -1    0.00    0.16
  -4   6   1    0.05    0.06
  -4   6   1    0.08    0.18
  -4   6   1    0.10    0.15
   3  -6  -1   -0.04    0.07
   3  -6  -1    0.08    0.07
   3  -6  -1    0.05    0.11
  -3   6   1   -0.01    0.05
  -3   6   1   -0.10    0.05
  -3   6   1    0.12    0.15
  -3   6   1   -0.06    0.15
   2  -6  -1   70.07    2.93
   2  -6  -1   76.01    2.84
   2  -6  -1   77.91    2.84
  -2   6   1   74.66    2.82
  -2   6   1   75.49    2.99
  -2   6   1   76.75    2.74
  -2   6   1   76.44    2.81
  -2   6   1   71.27    2.93
   1  -6  -1    0.78    0.13
   1  -6  -1    0.51    0.19
  -1   6   1    0.71    0.14
  -1   6   1    0.60    0.17
  -1   6   1    0.56    0.12
  -1   6   1    0.71    0.12
  -1   6   1    0.77    0.12
   0  -6  -1    4.88    0.32
   0  -6  -1    4.90    0.26
   0  -6  -1    5.21    0.34
   0  -6  -1    4.29    0.43
   0  -6  -1    4.70    0.34
   0   6   1    4.76    0.32
   0   6   1    5.17    0.24
   0   6   1    4.04    0.24
   0   6   1    4.32    0.34
  -1  -6  -1    2.06    0.30
  -1  -6  -1    1.94    0.26
  -1  -6  -1    2.58    0.28
  -1  -6  -1    2.31    0.15
  -1  -6  -1    2.52    0.26
   1   6   1    2.27    0.26
   1   6   1    2.56    0.28
  -2  -6  -1   21.27    0.84
  -2  -6  -1   23.47    0.97
  -2  -6  -1   23.34    1.07
  -2  -6  -1   19.50    1.05
  -2  -6  -1   21.39    1.06
   2   6   1   20.69    1.03
   2   6   1   21.68    0.96
  -3  -6  -1    0.27    0.17
  -3  -6  -1    0.54    0.16
  -3  -6  -1    0.35    0.19
  -3  -6  -1    0.37    0.09
  -3  -6  -1    0.30    0.20
   3   6   1    0.41    0.14
   3   6   1    0.92    0.24
  -4  -6  -1   -0.18    0.12
  -4  -6  -1    0.11    0.10
  -4  -6  -1    0.12    0.19
   4   6   1    0.05    0.17
  -5  -6  -1   13.19    0.81
  -5  -6  -1   13.85    0.74
  -5  -6  -1   13.82    0.92
   5   6   1   13.02    0.87
  -6  -6  -1    5.67    0.58
  -6  -6  -1    5.59    0.68
  -6  -6  -1    5.71    0.54
   6   6   1    5.03    0.61
   6   6   1    5.22    0.58
  -7  -6  -1    0.19    0.19
  -7  -6  -1    0.41    0.30
  -7  -6  -1    0.24    0.22
   7   6   1    0.43    0.26
   7   6   1    0.30    0.28
  -8  -6  -1    0.11    0.23
  -8  -6  -1    0.78    0.31
   8   6   1    0.85    0.35
   8   6   1    0.68    0.32
  -9  -6  -1    2.25    0.42
  -9  -6  -1    3.65    0.59
  -9  -6  -1    2.18    0.56
   9   6   1    2.70    0.52
   9   6   1    2.63    0.57
 -10  -6  -1    1.38    0.46
 -10  -6  -1    2.28    0.63
  10   6   1    2.24    0.58
  10   6   1    2.45    0.55
   8  -7  -1   -0.11    0.26
   8  -7  -1    0.18    0.14
  -8   7   1   -0.07    0.22
  -8   7   1    0.22    0.35
   7  -7  -1    0.00    0.25
   7  -7  -1   -0.10    0.11
  -7   7   1   -0.28    0.24
  -7   7   1   -0.21    0.27
   6  -7  -1    0.10    0.25
   6  -7  -1    0.37    0.13
  -6   7   1    0.35    0.16
  -6   7   1    0.34    0.28
  -6   7   1    0.29    0.26
   5  -7  -1    0.33    0.17
   5  -7  -1    0.49    0.25
   5  -7  -1    0.11    0.09
   5  -7  -1    0.05    0.09
  -5   7   1    0.30    0.24
  -5   7   1   -0.01    0.22
   4  -7  -1    7.75    0.57
   4  -7  -1    8.89    0.41
  -4   7   1    8.46    0.66
  -4   7   1    8.34    0.63
   3  -7  -1    2.06    0.18
   3  -7  -1    1.68    0.16
   3  -7  -1    2.21    0.33
  -3   7   1    1.74    0.11
  -3   7   1    1.66    0.29
  -3   7   1    1.36    0.30
  -3   7   1    1.78    0.11
   2  -7  -1    7.11    0.37
   2  -7  -1    7.18    0.38
   2  -7  -1    6.69    0.51
  -2   7   1    6.76    0.34
  -2   7   1    6.83    0.34
  -2   7   1    6.25    0.40
  -2   7   1    6.76    0.46
  -2   7   1    6.35    0.49
   1  -7  -1    0.12    0.13
   1  -7  -1    0.03    0.09
   1  -7  -1   -0.05    0.03
  -1   7   1    0.05    0.09
  -1   7   1    0.04    0.13
  -1   7   1    0.05    0.08
  -1   7   1    0.06    0.08
   0  -7  -1    2.62    0.30
   0  -7  -1    1.88    0.26
   0  -7  -1    2.54    0.19
   0  -7  -1    2.32    0.26
   0  -7  -1    2.69    0.36
   0   7   1    2.21    0.14
   0   7   1    3.15    0.32
   0   7   1    2.63    0.27
   0   7   1    2.44    0.19
  -1  -7  -1   10.64    0.57
  -1  -7  -1    9.91    0.59
  -1  -7  -1   10.43    0.45
  -1  -7  -1   10.24    0.68
  -1  -7  -1    9.95    0.62
   1   7   1   10.25    0.59
   1   7   1    9.85    0.56
  -2  -7  -1    9.39    0.42
  -2  -7  -1    8.83    0.63
  -2  -7  -1    7.96    0.59
  -2  -7  -1    9.66    0.52
  -2  -7  -1    8.58    0.58
   2   7   1    9.24    0.53
   2   7   1    8.71    0.58
  -3  -7  -1    6.89    0.58
  -3  -7  -1    7.60    0.40
  -3  -7  -1    8.12    0.60
  -3  -7  -1    7.41    0.35
   3   7   1    7.55    0.48
   3   7   1    7.46    0.57
  -4  -7  -1    4.61    0.53
  -4  -7  -1    5.06    0.58
  -4  -7  -1    5.53    0.34
   4   7   1    3.62    0.48
  -5  -7  -1   17.33    1.05
  -5  -7  -1   20.62    1.20
  -5  -7  -1   19.57    0.94
   5   7   1   19.15    1.13
  -6  -7  -1    7.63    0.55
  -6  -7  -1    6.40    0.66
  -6  -7  -1    6.63    0.77
   6   7   1    6.36    0.66
   6   7   1    7.14    0.76
  -7  -7  -1    1.20    0.39
  -7  -7  -1    0.81    0.28
  -7  -7  -1    0.86    0.31
   7   7   1    0.55    0.30
   7   7   1    1.13    0.38
  -8  -7  -1    1.52    0.37
  -8  -7  -1    0.86    0.32
   8   7   1    1.66    0.45
   8   7   1    1.39    0.42
  -9  -7  -1   -0.27    0.25
  -9  -7  -1   -0.32    0.20
  -9  -7  -1   -0.30    0.31
   9   7   1   -0.01    0.31
   9   7   1    0.29    0.31
   8  -8  -1    0.07    0.36
  -8   8   1    0.45    0.38
  -8   8   1    0.50    0.39
   7  -8  -1    0.03    0.24
  -7   8   1   -0.20    0.22
  -7   8   1    0.17    0.33
   6  -8  -1    1.37    0.13
  -6   8   1    1.07    0.35
  -6   8   1    2.12    0.45
  -6   8   1    1.28    0.25
   5  -8  -1    2.54    0.38
  -5   8   1    2.08    0.41
  -5   8   1    2.15    0.40
   4  -8  -1    0.43    0.07
   4  -8  -1    0.50    0.21
   4  -8  -1    0.24    0.07
  -4   8   1    0.55    0.26
  -4   8   1    0.35    0.22
   3  -8  -1   24.41    1.03
   3  -8  -1   26.96    1.29
   3  -8  -1   24.79    1.02
  -3   8   1   28.12    1.31
  -3   8   1   26.24    1.26
   2  -8  -1    1.58    0.20
   2  -8  -1    2.05    0.21
   2  -8  -1    1.90    0.35
  -2   8   1    1.97    0.32
  -2   8   1    1.97    0.27
  -2   8   1    1.92    0.18
   1  -8  -1    0.70    0.24
   1  -8  -1    0.57    0.15
  -1   8   1    0.74    0.14
  -1   8   1    0.55    0.13
  -1   8   1    0.54    0.18
  -1   8   1    0.52    0.14
   0  -8  -1    0.03    0.09
   0  -8  -1   -0.04    0.10
   0  -8  -1    0.16    0.13
   0  -8  -1   -0.07    0.14
   0   8   1    0.01    0.11
   0   8   1   -0.01    0.08
   0   8   1    0.11    0.13
   0   8   1    0.02    0.03
   0   8   1    0.04    0.04
  -1  -8  -1    9.32    0.68
  -1  -8  -1    7.93    0.59
  -1  -8  -1    9.34    0.58
  -1  -8  -1    9.30    0.43
   1   8   1    8.94    0.58
   1   8   1    9.49    0.56
  -2  -8  -1    0.08    0.08
  -2  -8  -1    0.06    0.16
  -2  -8  -1   -0.03    0.17
  -2  -8  -1    0.29    0.19
   2   8   1    0.10    0.14
   2   8   1   -0.04    0.13
  -3  -8  -1    2.54    0.24
  -3  -8  -1    1.90    0.37
  -3  -8  -1    2.79    0.42
   3   8   1    2.59    0.32
   3   8   1    3.02    0.41
  -4  -8  -1    1.53    0.34
  -4  -8  -1    0.94    0.18
  -4  -8  -1    1.58    0.18
  -4  -8  -1    1.33    0.33
   4   8   1    0.84    0.28
  -5  -8  -1   19.18    0.90
  -5  -8  -1   18.49    1.18
  -5  -8  -1   17.34    1.09
   5   8   1   18.95    1.14
  -6  -8  -1    0.82    0.31
  -6  -8  -1    1.03    0.38
  -6  -8  -1    0.96    0.24
   6   8   1    0.98    0.34
   6   8   1    0.95    0.33
  -7  -8  -1    1.98    0.43
  -7  -8  -1    1.56    0.46
  -7  -8  -1    1.79    0.34
   7   8   1    2.58    0.50
   7   8   1    2.50    0.50
  -8  -8  -1    0.00    0.23
  -8  -8  -1    0.05    0.25
   8   8   1    0.29    0.34
   8   8   1    0.20    0.29
  -9  -8  -1   -0.27    0.25
  -9  -8  -1    0.07    0.37
   9   8   1    0.50    0.38
   9   8   1   -0.06    0.29
  -7   9   1   -0.03    0.27
  -7   9   1    0.47    0.32
  -6   9   1    1.17    0.38
  -6   9   1    1.56    0.43
   5  -9  -1   -0.09    0.17
  -5   9   1    0.53    0.25
  -5   9   1   -0.23    0.18
   4  -9  -1    2.05    0.40
  -4   9   1    2.91    0.48
  -4   9   1    2.36    0.40
   3  -9  -1    0.06    0.21
   3  -9  -1    0.32    0.09
   3  -9  -1    0.29    0.08
  -3   9   1    0.01    0.18
  -3   9   1    0.16    0.23
   2  -9  -1    3.13    0.28
   2  -9  -1    2.54    0.25
   2  -9  -1    2.24    0.40
  -2   9   1    2.51    0.31
  -2   9   1    2.46    0.19
  -2   9   1    2.76    0.40
   1  -9  -1   16.11    0.83
   1  -9  -1   17.42    1.03
  -1   9   1   17.62    0.78
  -1   9   1   17.45    0.77
  -1   9   1   16.61    0.80
  -1   9   1   16.80    0.91
   0  -9  -1   18.74    0.99
   0  -9  -1   19.80    0.84
   0  -9  -1   20.44    1.15
   0  -9  -1   19.20    0.96
   0   9   1   22.03    0.99
   0   9   1   19.37    0.99
  -1  -9  -1    4.72    0.58
  -1  -9  -1    4.78    0.29
  -1  -9  -1    4.14    0.48
  -1  -9  -1    4.85    0.47
   1   9   1    4.37    0.45
   1   9   1    4.67    0.44
  -2  -9  -1    5.73    0.64
  -2  -9  -1    5.65    0.58
  -2  -9  -1    5.94    0.33
  -2  -9  -1    6.78    0.61
   2   9   1    6.13    0.58
   2   9   1    5.90    0.46
  -3  -9  -1   39.36    1.45
  -3  -9  -1   34.37    1.80
  -3  -9  -1   37.65    1.83
   3   9   1   39.11    1.64
   3   9   1   36.16    1.76
  -4  -9  -1    3.68    0.32
  -4  -9  -1    2.95    0.49
  -4  -9  -1    2.97    0.51
   4   9   1    3.60    0.51
  -5  -9  -1   16.52    0.78
  -5  -9  -1   17.30    0.82
  -5  -9  -1   16.71    1.08
  -5  -9  -1   15.08    1.10
   5   9   1   15.72    1.07
  -6  -9  -1    1.23    0.40
  -6  -9  -1    1.08    0.35
   6   9   1    1.01    0.35
   6   9   1    1.26    0.39
  -7  -9  -1    0.06    0.31
  -7  -9  -1    0.79    0.37
   7   9   1    0.84    0.36
   7   9   1    1.04    0.41
  -8  -9  -1    1.54    0.51
  -8  -9  -1    2.23    0.51
   8   9   1    1.81    0.53
   8   9   1    1.29    0.43
  -7  10   1    0.62    0.38
  -7  10   1    0.73    0.37
  -6  10   1    3.26    0.55
  -6  10   1    3.39    0.58
   5 -10  -1   -0.03    0.19
  -5  10   1    0.23    0.27
  -5  10   1   -0.01    0.24
   4 -10  -1    0.71    0.28
  -4  10   1    0.15    0.22
  -4  10   1    0.57    0.29
   3 -10  -1    0.12    0.23
  -3  10   1    0.55    0.26
  -3  10   1    0.61    0.23
   2 -10  -1   -0.05    0.17
   2 -10  -1    0.06    0.11
  -2  10   1   -0.07    0.13
  -2  10   1   -0.08    0.22
   1 -10  -1    0.33    0.17
   1 -10  -1    0.10    0.21
  -1  10   1    0.16    0.19
  -1  10   1    0.09    0.10
   0 -10  -1    5.44    0.53
   0 -10  -1    6.84    0.73
   0  10   1    6.45    0.51
   0  10   1    6.64    0.52
  -1 -10  -1   43.72    1.94
  -1 -10  -1   42.52    1.60
  -1 -10  -1   43.55    2.06
   1  10   1   41.44    1.87
   1  10   1   42.09    1.82
  -2 -10  -1    4.45    0.60
  -2 -10  -1    4.60    0.29
  -2 -10  -1    4.37    0.53
   2  10   1    4.21    0.45
   2  10   1    4.41    0.50
  -3 -10  -1    2.11    0.42
  -3 -10  -1    1.16    0.37
  -3 -10  -1    2.23    0.22
   3  10   1    1.77    0.31
   3  10   1    1.35    0.35
  -4 -10  -1   25.86    1.45
  -4 -10  -1   25.40    1.05
  -4 -10  -1   24.96    1.44
   4  10   1   23.50    1.37
  -5 -10  -1   -0.19    0.29
  -5 -10  -1    0.36    0.18
  -5 -10  -1    1.18    0.38
   5  10   1    0.19    0.28
  -6 -10  -1    0.25    0.30
  -6 -10  -1    0.05    0.30
   6  10   1    0.41    0.33
  -7 -10  -1    2.98    0.59
   7  10   1    3.31    0.60
   7  10   1    2.53    0.56
  -6  11   1   -0.09    0.30
   5 -11  -1    0.09    0.24
  -5  11   1   -0.01    0.28
   4 -11  -1    0.45    0.27
  -4  11   1    0.44    0.30
   3 -11  -1    0.68    0.31
  -3  11   1    0.24    0.25
   2 -11  -1    2.85    0.51
  -2  11   1    2.53    0.44
   1 -11  -1    1.25    0.37
   1 -11  -1    1.11    0.23
  -1  11   1    1.06    0.29
   0 -11  -1    2.62    0.37
   0 -11  -1    1.98    0.45
   0  11   1    1.80    0.35
  -1 -11  -1    2.54    0.51
  -1 -11  -1    3.01    0.43
   1  11   1    2.05    0.35
  -2 -11  -1    3.65    0.52
  -2 -11  -1    4.33    0.64
   2  11   1    3.37    0.41
  -3 -11  -1    1.47    0.43
  -3 -11  -1    1.10    0.37
   3  11   1    1.00    0.32
   3  11   1    1.15    0.28
  -4 -11  -1    0.59    0.36
  -4 -11  -1    1.49    0.44
   4  11   1    0.91    0.32
  -5 -11  -1   -0.19    0.27
  -5 -11  -1   -0.12    0.28
   5  11   1    0.45    0.30
  -6 -11  -1    0.09    0.36
  -6 -11  -1    0.45    0.33
   6  11   1   -0.17    0.30
  -7 -11  -1    1.06    0.43
   7  11   1    0.76    0.43
   4 -12  -1    0.31    0.30
  -4  12   1    0.49    0.34
   3 -12  -1    0.06    0.26
  -3  12   1   -0.09    0.26
   2 -12  -1    0.42    0.31
   2 -12  -1    0.17    0.11
  -2  12   1    0.24    0.25
   1 -12  -1    0.19    0.24
  -1  12   1    0.20    0.21
   0 -12  -1    0.04    0.16
   0 -12  -1    0.12    0.27
   0  12   1    0.02    0.20
  -1 -12  -1    0.11    0.26
  -1 -12  -1   -0.12    0.16
   1  12   1   -0.25    0.18
  -2 -12  -1   -0.18    0.25
  -2 -12  -1    0.04    0.21
   2  12   1   -0.15    0.18
  -3 -12  -1    3.89    0.67
  -3 -12  -1    4.18    0.61
  -4 -12  -1    2.86    0.60
  -4 -12  -1    3.46    0.59
  -5 -12  -1    0.75    0.40
  -5 -12  -1    1.56    0.50
   3 -13  -1    0.47    0.36
  -3  13   1    0.06    0.27
   2 -13  -1   -0.41    0.20
  -2  13   1   -0.02    0.27
   1 -13  -1    0.04    0.15
   1 -13  -1    0.12    0.31
   0 -13  -1    0.24    0.33
  -1 -13  -1    0.35    0.31
  -2 -13  -1    1.37    0.47
  -2 -13  -1    0.92    0.34
  -3 -13  -1    1.61    0.42
  -3 -13  -1    0.68    0.42
  -4 -13  -1   -0.40    0.29
  -1 -13   2   -0.39    0.31
   0 -13   2    1.65    0.32
   0 -13   2    1.11    0.46
   1 -13   2    0.94    0.43
  -4 -12   2    0.57    0.34
  -4 -12   2    1.01    0.43
  -3 -12   2    1.38    0.46
  -3 -12   2    1.13    0.41
  -2 -12   2    0.13    0.31
  -2 -12   2    0.67    0.33
  -1 -12   2    0.74    0.28
  -1 -12   2    0.54    0.37
   0 -12   2    0.31    0.22
   0 -12   2    0.56    0.38
   1 -12   2    0.04    0.13
   1 -12   2    0.48    0.35
   2 -12   2    0.16    0.28
   3 -12   2    0.03    0.32
  -4  12  -2    1.50    0.47
   4 -12   2    1.82    0.48
  -5 -11   2    1.14    0.45
  -5 -11   2    0.55    0.35
  -4 -11   2    0.20    0.33
  -4 -11   2    0.46    0.29
  -3 -11   2    0.45    0.20
  -3 -11   2   -0.16    0.21
  -3 -11   2    0.01    0.29
  -2 -11   2    1.87    0.31
  -2 -11   2    1.30    0.44
  -2 -11   2    1.06    0.33
  -1 -11   2    0.23    0.25
  -1 -11   2   -0.26    0.13
  -1 -11   2   -0.26    0.16
   0 -11   2    0.83    0.37
   0 -11   2    0.37    0.20
   0 -11   2    0.60    0.21
   1 -11   2    0.07    0.22
   1 -11   2   -0.14    0.15
   1 -11   2    0.06    0.13
  -2  11  -2    0.39    0.24
   2 -11   2    0.58    0.24
   2 -11   2    0.96    0.37
  -3  11  -2   -0.09    0.19
   3 -11   2    0.23    0.29
  -4  11  -2    4.06    0.54
  -4  11  -2    3.82    0.59
   4 -11   2    3.15    0.58
  -5  11  -2    0.43    0.32
  -5  11  -2    0.16    0.27
   6  10  -2   -0.22    0.23
   6  10  -2    0.22    0.29
  -6 -10   2   -0.41    0.21
  -6 -10   2   -0.23    0.20
  -6 -10   2   -0.17    0.31
   5  10  -2    1.20    0.40
   5  10  -2    0.92    0.33
  -5 -10   2    0.88    0.27
  -5 -10   2    1.48    0.44
  -5 -10   2    0.92    0.40
   4  10  -2    0.56    0.27
  -4 -10   2    0.17    0.18
  -4 -10   2   -0.05    0.25
  -4 -10   2    0.14    0.28
   3  10  -2    0.82    0.31
  -3 -10   2    0.55    0.33
  -3 -10   2    0.76    0.24
  -3 -10   2    0.49    0.28
  -2 -10   2    0.11    0.27
  -2 -10   2    0.11    0.19
  -2 -10   2    0.17    0.15
  -1 -10   2    2.12    0.46
  -1 -10   2    1.94    0.30
  -1 -10   2    2.19    0.37
   0  10  -2    0.75    0.18
   0 -10   2    0.42    0.30
   0 -10   2    0.69    0.23
   0 -10   2    1.30    0.24
  -1  10  -2    0.67    0.20
   1 -10   2    1.18    0.26
   1 -10   2    0.89    0.35
   1 -10   2    0.99    0.20
  -2  10  -2    7.37    0.57
  -2  10  -2    7.26    0.54
   2 -10   2    7.27    0.56
   2 -10   2    6.35    0.75
   2 -10   2    7.38    0.33
  -3  10  -2    5.76    0.59
  -3  10  -2    5.88    0.56
   3 -10   2    6.42    0.76
   3 -10   2    5.78    0.59
  -4  10  -2    0.99    0.31
  -4  10  -2    1.77    0.40
  -4  10  -2    1.77    0.38
   4 -10   2    2.02    0.46
  -5  10  -2    1.81    0.43
  -5  10  -2    1.78    0.41
  -5  10  -2    1.32    0.36
  -6  10  -2    0.89    0.33
  -6  10  -2    0.57    0.30
  -6  10  -2    0.94    0.38
   7   9  -2    0.24    0.32
   7   9  -2    1.24    0.37
  -7  -9   2    0.91    0.36
  -7  -9   2    1.12    0.34
  -7  -9   2    1.90    0.55
   6   9  -2    5.47    0.75
   6   9  -2    5.24    0.61
  -6  -9   2    6.47    0.84
  -6  -9   2    6.53    0.76
  -6  -9   2    5.63    0.60
   5   9  -2    0.41    0.31
   5   9  -2   -0.61    0.16
  -5  -9   2   -0.13    0.26
  -5  -9   2    0.12    0.26
  -5  -9   2    0.05    0.19
   4   9  -2    1.35    0.35
  -4  -9   2    0.86    0.35
  -4  -9   2    1.31    0.29
  -4  -9   2    1.13    0.35
   3   9  -2    8.16    0.67
  -3  -9   2    7.47    0.76
  -3  -9   2    7.43    0.53
  -3  -9   2    7.73    0.79
   2   9  -2    3.28    0.42
  -2  -9   2    2.33    0.41
  -2  -9   2    3.15    0.36
  -2  -9   2    3.21    0.51
   1   9  -2   11.83    0.55
   1   9  -2   10.42    0.68
  -1  -9   2   10.91    0.63
  -1  -9   2   12.08    0.87
  -1  -9   2   10.45    0.72
   0   9  -2    2.55    0.27
   0   9  -2    3.33    0.34
   0  -9   2    3.05    0.37
   0  -9   2    2.10    0.32
   0  -9   2    2.59    0.46
   0  -9   2    2.85    0.34
  -1   9  -2    4.66    0.37
   1  -9   2    5.05    0.47
   1  -9   2    4.66    0.35
   1  -9   2    4.83    0.36
   1  -9   2    5.58    0.65
  -2   9  -2    1.27    0.26
   2  -9   2    1.59    0.30
   2  -9   2    1.88    0.15
   2  -9   2    1.86    0.14
   2  -9   2    1.39    0.36
  -3   9  -2   -0.12    0.19
  -3   9  -2    0.06    0.16
   3  -9   2    0.23    0.25
   3  -9   2    0.23    0.20
  -4   9  -2   16.21    0.98
  -4   9  -2   13.54    0.88
  -4   9  -2   14.88    0.96
   4  -9   2   15.08    1.00
  -5   9  -2    0.04    0.23
  -5   9  -2    0.51    0.27
  -5   9  -2    0.34    0.25
  -6   9  -2   -0.03    0.21
  -6   9  -2    0.16    0.27
  -6   9  -2   -0.06    0.22
  -7   9  -2    0.39    0.32
  -7   9  -2   -0.07    0.26
   8   8  -2    0.12    0.32
   8   8  -2    0.06    0.26
  -8  -8   2    0.30    0.30
  -8  -8   2   -0.03    0.26
  -8  -8   2    0.47    0.42
   7   8  -2    1.40    0.45
   7   8  -2    1.29    0.36
  -7  -8   2    0.85    0.33
  -7  -8   2    0.88    0.35
  -7  -8   2    1.84    0.52
   6   8  -2   -0.05    0.25
   6   8  -2    0.02    0.22
  -6  -8   2    0.01    0.17
  -6  -8   2   -0.14    0.26
  -6  -8   2   -0.16    0.22
   5   8  -2    5.94    0.58
   5   8  -2    6.66    0.74
  -5  -8   2    5.92    0.57
  -5  -8   2    6.36    0.74
  -5  -8   2    5.03    0.51
  -5  -8   2    5.89    0.67
   4   8  -2    1.57    0.37
  -4  -8   2    0.89    0.32
  -4  -8   2    1.39    0.28
  -4  -8   2    1.52    0.37
   3   8  -2    1.76    0.34
   3   8  -2    2.04    0.28
  -3  -8   2    1.83    0.20
  -3  -8   2    1.91    0.30
  -3  -8   2    1.09    0.32
  -3  -8   2    1.36    0.35
   2   8  -2    0.58    0.16
   2   8  -2    0.43    0.21
  -2  -8   2    0.80    0.12
  -2  -8   2    0.71    0.25
  -2  -8   2    0.76    0.28
  -2  -8   2    0.39    0.24
  -2  -8   2    0.59    0.18
   1   8  -2    4.42    0.33
   1   8  -2    4.56    0.44
   1   8  -2    3.82    0.26
  -1  -8   2    4.37    0.40
  -1  -8   2    3.94    0.44
  -1  -8   2    4.82    0.48
  -1  -8   2    3.38    0.48
   0   8  -2   20.83    0.96
   0   8  -2   20.13    0.97
   0   8  -2   20.55    0.90
   0  -8   2   21.91    1.01
   0  -8   2   19.88    1.16
   0  -8   2   22.49    0.98
   0  -8   2   20.45    1.01
  -1   8  -2   15.08    0.71
  -1   8  -2   13.63    0.65
   1  -8   2   13.85    0.91
   1  -8   2   14.72    0.70
   1  -8   2   13.63    0.73
  -2   8  -2    5.57    0.43
   2  -8   2    6.25    0.29
   2  -8   2    6.14    0.29
   2  -8   2    6.11    0.65
   2  -8   2    6.08    0.47
  -3   8  -2    1.95    0.31
  -3   8  -2    1.10    0.29
   3  -8   2    1.81    0.31
   3  -8   2    1.13    0.33
  -4   8  -2    0.13    0.21
  -4   8  -2    0.03    0.20
  -4   8  -2    0.09    0.19
   4  -8   2   -0.09    0.20
  -5   8  -2    0.99    0.31
  -5   8  -2    1.12    0.30
  -5   8  -2    1.05    0.32
  -6   8  -2   -0.18    0.20
  -6   8  -2    0.39    0.29
  -6   8  -2    0.24    0.20
   6  -8   2   -0.13    0.22
  -7   8  -2    0.20    0.23
  -7   8  -2   -0.33    0.26
   7  -8   2    0.11    0.27
  -8   8  -2    0.35    0.33
  -8   8  -2    0.45    0.37
   8  -8   2    0.38    0.36
   8   7  -2    1.62    0.36
   8   7  -2    1.66    0.42
   8   7  -2    2.22    0.53
  -8  -7   2    1.93    0.42
  -8  -7   2    1.58    0.42
  -8  -7   2    2.59    0.61
   7   7  -2    7.77    0.76
   7   7  -2    9.23    0.95
  -7  -7   2    8.91    0.74
  -7  -7   2   10.86    1.10
  -7  -7   2    9.71    0.74
   6   7  -2    4.90    0.66
   6   7  -2    5.61    0.59
  -6  -7   2    4.85    0.54
  -6  -7   2    5.77    0.75
  -6  -7   2    5.48    0.61
   5   7  -2    3.69    0.44
   5   7  -2    3.33    0.49
  -5  -7   2    3.95    0.44
  -5  -7   2    3.13    0.47
  -5  -7   2    3.04    0.52
   4   7  -2   -0.15    0.15
   4   7  -2   -0.06    0.20
  -4  -7   2    0.07    0.11
  -4  -7   2   -0.30    0.16
  -4  -7   2   -0.13    0.20
  -4  -7   2   -0.12    0.13
  -4  -7   2   -0.16    0.14
   3   7  -2    1.06    0.28
   3   7  -2    0.55    0.17
  -3  -7   2    0.77    0.21
  -3  -7   2    0.89    0.14
  -3  -7   2    0.88    0.29
  -3  -7   2    0.48    0.24
   2   7  -2    6.66    0.52
   2   7  -2    6.54    0.43
  -2  -7   2    7.31    0.59
  -2  -7   2    7.85    0.47
  -2  -7   2    7.08    0.56
  -2  -7   2    6.90    0.54
  -2  -7   2    7.23    0.35
   1   7  -2    3.53    0.29
   1   7  -2    3.72    0.38
   1   7  -2    3.42    0.23
  -1  -7   2    3.26    0.38
  -1  -7   2    4.09    0.37
  -1  -7   2    3.96    0.41
  -1  -7   2    3.49    0.45
   0   7  -2    9.85    0.55
   0   7  -2    9.31    0.53
   0   7  -2   10.57    0.49
   0  -7   2   10.09    0.70
   0  -7   2    9.56    0.57
   0  -7   2    9.38    0.57
   0  -7   2   10.42    0.56
  -1   7  -2    1.19    0.19
  -1   7  -2    1.41    0.16
   1  -7   2    1.84    0.26
   1  -7   2    1.26    0.18
   1  -7   2    1.35    0.30
   1  -7   2    0.87    0.14
  -2   7  -2   17.93    0.85
   2  -7   2   18.37    1.00
   2  -7   2   16.72    0.86
   2  -7   2   16.73    0.69
   2  -7   2   17.83    0.69
  -3   7  -2    0.35    0.18
   3  -7   2    0.35    0.20
   3  -7   2    0.09    0.18
  -4   7  -2    0.80    0.24
  -4   7  -2    0.78    0.25
  -4   7  -2    1.61    0.33
   4  -7   2    0.99    0.29
  -5   7  -2   -0.11    0.21
  -5   7  -2    0.20    0.18
  -5   7  -2    0.03    0.19
   5  -7   2   -0.02    0.19
  -6   7  -2    2.77    0.49
  -6   7  -2    3.41    0.42
   6  -7   2    2.76    0.47
  -7   7  -2   -0.39    0.21
   7  -7   2    0.05    0.24
  -8   7  -2    0.61    0.38
   8  -7   2    0.08    0.30
  -9   7  -2    0.30    0.36
   9  -7   2    0.96    0.42
   9   6  -2    0.12    0.29
   9   6  -2    0.12    0.34
  -9  -6   2   -0.04    0.31
  -9  -6   2    0.06    0.38
   8   6  -2    0.13    0.28
   8   6  -2   -0.05    0.19
   8   6  -2    0.69    0.38
  -8  -6   2    0.32    0.24
  -8  -6   2    0.12    0.27
  -8  -6   2   -0.17    0.31
   7   6  -2    8.63    0.91
   7   6  -2    9.12    0.72
  -7  -6   2    8.86    0.68
  -7  -6   2    8.09    0.93
  -7  -6   2    8.93    0.74
   6   6  -2    2.95    0.52
   6   6  -2    3.97    0.49
  -6  -6   2    3.31    0.47
  -6  -6   2    3.93    0.61
  -6  -6   2    3.64    0.47
   5   6  -2    1.67    0.32
   5   6  -2    1.71    0.38
  -5  -6   2    1.86    0.34
  -5  -6   2    1.29    0.29
  -5  -6   2    1.61    0.40
   4   6  -2    3.40    0.46
   4   6  -2    2.55    0.33
  -4  -6   2    2.94    0.46
  -4  -6   2    2.19    0.37
  -4  -6   2    3.31    0.37
  -4  -6   2    3.88    0.33
   3   6  -2    0.07    0.12
   3   6  -2    0.13    0.16
  -3  -6   2   -0.13    0.11
  -3  -6   2   -0.16    0.10
  -3  -6   2    0.02    0.16
  -3  -6   2    0.68    0.23
  -3  -6   2   -0.07    0.07
   2   6  -2    3.06    0.30
   2   6  -2    2.33    0.32
  -2  -6   2    2.93    0.40
  -2  -6   2    2.55    0.18
  -2  -6   2    2.16    0.32
  -2  -6   2    2.47    0.28
  -2  -6   2    3.14    0.37
   1   6  -2   40.92    1.56
   1   6  -2   44.05    1.71
   1   6  -2   40.92    1.75
  -1  -6   2   42.51    1.64
  -1  -6   2   41.03    1.78
  -1  -6   2   39.01    1.81
  -1  -6   2   42.66    1.78
   0   6  -2   19.26    0.84
   0   6  -2   18.54    0.82
   0   6  -2   16.76    0.74
   0   6  -2   18.59    0.83
   0   6  -2   18.47    0.84
   0  -6   2   17.72    0.84
   0  -6   2   18.79    0.97
   0  -6   2   17.77    0.86
   0  -6   2   17.88    0.82
  -1   6  -2    0.44    0.14
  -1   6  -2    0.45    0.09
  -1   6  -2    0.49    0.12
  -1   6  -2    0.39    0.10
   1  -6   2    0.61    0.17
   1  -6   2    0.08    0.06
   1  -6   2    0.38    0.11
   1  -6   2    0.38    0.19
  -2   6  -2    1.87    0.25
   2  -6   2    2.16    0.12
   2  -6   2    1.92    0.32
   2  -6   2    2.02    0.28
   2  -6   2    2.19    0.13
  -3   6  -2    1.51    0.25
   3  -6   2    1.62    0.26
   3  -6   2    2.19    0.34
  -4   6  -2    0.05    0.20
  -4   6  -2    0.22    0.16
   4  -6   2    0.17    0.16
  -5   6  -2    0.16    0.16
  -5   6  -2    0.41    0.24
   5  -6   2    0.56    0.24
  -6   6  -2    0.17    0.30
  -6   6  -2    0.35    0.19
   6  -6   2    0.04    0.21
  -7   6  -2   11.38    0.94
  -7   6  -2   12.03    0.68
   7  -6   2   11.33    0.48
   7  -6   2   11.98    0.89
  -8   6  -2    0.22    0.32
   8  -6   2    0.14    0.28
   8  -6   2    0.34    0.12
  -9   6  -2   -0.46    0.23
   9  -6   2   -0.05    0.29
   9   5  -2    0.94    0.42
   9   5  -2    0.23    0.28
  -9  -5   2    0.39    0.37
  -9  -5   2    0.38    0.36
   8   5  -2    0.56    0.35
   8   5  -2    0.25    0.20
   8   5  -2    0.23    0.27
  -8  -5   2    0.39    0.34
  -8  -5   2    0.59    0.33
   7   5  -2    1.68    0.43
   7   5  -2    2.56    0.43
  -7  -5   2    1.60    0.46
  -7  -5   2    1.63    0.32
  -7  -5   2    1.49    0.39
   6   5  -2   -0.07    0.18
   6   5  -2   -0.20    0.21
  -6  -5   2   -0.24    0.25
  -6  -5   2   -0.09    0.17
  -6  -5   2   -0.08    0.17
   5   5  -2   11.83    0.82
   5   5  -2   10.34    0.68
  -5  -5   2   11.70    0.72
  -5  -5   2   12.64    0.74
  -5  -5   2    9.77    0.80
   4   5  -2   13.45    0.87
   4   5  -2   13.55    0.75
  -4  -5   2   15.47    0.81
  -4  -5   2   15.25    0.71
  -4  -5   2   14.26    0.81
  -4  -5   2   14.75    0.92
   3   5  -2   76.62    2.98
   3   5  -2   73.33    3.02
  -3  -5   2   77.21    2.76
  -3  -5   2   73.31    2.94
  -3  -5   2   71.07    3.05
  -3  -5   2   71.36    2.94
   2   5  -2   22.70    1.03
   2   5  -2   21.96    1.09
  -2  -5   2   22.44    1.10
  -2  -5   2   25.62    1.14
  -2  -5   2   21.64    0.98
  -2  -5   2   23.94    0.90
  -2  -5   2   22.67    1.02
  -2  -5   2   22.35    1.12
   1   5  -2    4.63    0.23
   1   5  -2    4.60    0.32
   1   5  -2    4.46    0.34
  -1  -5   2    4.48    0.44
  -1  -5   2    4.32    0.32
  -1  -5   2    4.83    0.37
  -1  -5   2    5.14    0.23
  -1  -5   2    4.97    0.37
   0   5  -2   17.92    0.79
   0   5  -2   17.26    0.75
   0   5  -2   17.84    0.78
   0   5  -2   16.81    0.78
   0   5  -2   17.42    0.80
   0   5  -2   17.07    0.70
   0  -5   2   16.95    0.89
   0  -5   2   17.19    0.81
   0  -5   2   18.46    0.81
   0  -5   2   16.83    0.77
  -1   5  -2   16.75    0.76
  -1   5  -2   16.80    0.71
  -1   5  -2   18.32    0.78
  -1   5  -2   16.34    0.70
  -1   5  -2   17.19    0.73
   1  -5   2   16.26    0.76
   1  -5   2   16.23    0.72
   1  -5   2   16.81    0.88
  -2   5  -2   -0.09    0.08
  -2   5  -2   -0.04    0.08
   2  -5   2    0.07    0.13
   2  -5   2    0.00    0.10
   2  -5   2    0.02    0.03
   2  -5   2    0.01    0.03
  -3   5  -2    0.54    0.17
   3  -5   2    0.51    0.20
   3  -5   2    0.45    0.16
   3  -5   2    0.60    0.19
  -4   5  -2    3.08    0.35
  -4   5  -2    2.90    0.40
   4  -5   2    3.02    0.37
   4  -5   2    2.59    0.34
  -5   5  -2    1.96    0.28
  -5   5  -2    1.61    0.36
   5  -5   2    1.96    0.12
   5  -5   2    2.47    0.37
   5  -5   2    2.17    0.12
  -6   5  -2    6.19    0.43
  -6   5  -2    7.61    0.78
   6  -5   2    5.45    0.32
   6  -5   2    5.28    0.32
   6  -5   2    5.91    0.62
  -7   5  -2   11.23    0.94
  -7   5  -2   12.36    0.65
   7  -5   2   12.26    0.87
   7  -5   2   12.53    0.62
  -8   5  -2    1.62    0.47
   8  -5   2    2.14    0.46
   8  -5   2    1.68    0.25
  -9   5  -2    0.14    0.33
   9  -5   2    0.22    0.18
   9  -5   2   -0.13    0.30
   9   4  -2    0.02    0.30
   9   4  -2    0.09    0.29
  -9  -4   2    0.16    0.35
  -9  -4   2    0.01    0.31
   8   4  -2    7.55    0.77
   8   4  -2    8.72    0.92
  -8  -4   2    8.16    0.93
  -8  -4   2    9.06    0.91
   7   4  -2   19.53    1.08
   7   4  -2   20.38    0.98
   7   4  -2   18.91    1.20
  -7  -4   2   18.73    0.95
  -7  -4   2   19.01    1.25
  -7  -4   2   18.18    1.15
   6   4  -2    0.62    0.28
   6   4  -2    0.64    0.25
  -6  -4   2    0.96    0.33
  -6  -4   2    0.39    0.19
  -6  -4   2    0.57    0.26
   5   4  -2    0.29    0.21
   5   4  -2    0.16    0.16
  -5  -4   2    0.17    0.23
  -5  -4   2    0.14    0.17
  -5  -4   2   -0.06    0.13
   4   4  -2    3.51    0.42
   4   4  -2    3.25    0.36
  -4  -4   2    4.14    0.42
  -4  -4   2    4.53    0.41
  -4  -4   2    4.04    0.31
  -4  -4   2    3.14    0.43
   3   4  -2    3.32    0.31
   3   4  -2    3.97    0.42
   3   4  -2    3.86    0.38
  -3  -4   2    3.12    0.35
  -3  -4   2    3.21    0.39
  -3  -4   2    3.46    0.24
  -3  -4   2    3.17    0.33
  -3  -4   2    3.99    0.43
   2   4  -2    6.66    0.42
   2   4  -2    6.38    0.45
   2   4  -2    7.43    0.48
  -2  -4   2    7.02    0.46
  -2  -4   2    6.78    0.48
  -2  -4   2    6.23    0.41
  -2  -4   2    7.52    0.33
  -2  -4   2    6.92    0.48
   1   4  -2    0.05    0.08
   1   4  -2   -0.07    0.08
   1   4  -2    0.28    0.11
   1   4  -2    0.04    0.09
  -1  -4   2   -0.17    0.07
  -1  -4   2    0.03    0.10
  -1  -4   2    0.05    0.09
  -1  -4   2    0.11    0.03
  -1  -4   2   -0.04    0.08
   0   4  -2   25.76    0.94
   0   4  -2   23.97    1.05
   0   4  -2   25.54    0.99
   0   4  -2   24.74    1.04
   0   4  -2   25.42    1.01
   0   4  -2   25.36    1.12
   0  -4   2   24.15    1.12
   0  -4   2   24.36    1.01
   0  -4   2   25.35    1.05
   0  -4   2   23.34    1.05
  -1   4  -2    0.00    0.06
  -1   4  -2   -0.03    0.07
  -1   4  -2    0.00    0.07
  -1   4  -2    0.00    0.05
  -1   4  -2    0.08    0.06
  -1   4  -2   -0.01    0.09
   1  -4   2   -0.07    0.07
   1  -4   2    0.25    0.14
   1  -4   2   -0.03    0.02
   1  -4   2   -0.04    0.05
  -2   4  -2    0.02    0.08
  -2   4  -2   -0.03    0.09
  -2   4  -2    0.04    0.10
   2  -4   2    0.06    0.03
   2  -4   2    0.02    0.10
   2  -4   2    0.03    0.03
   2  -4   2    0.01    0.11
   2  -4   2    0.05    0.08
  -3   4  -2   34.16    1.39
   3  -4   2   33.19    1.38
   3  -4   2   30.34    1.35
  -4   4  -2   17.91    0.88
   4  -4   2   18.41    0.94
   4  -4   2   18.22    0.74
   4  -4   2   20.36    0.75
  -5   4  -2    1.78    0.15
  -5   4  -2    1.86    0.16
  -5   4  -2    1.81    0.24
  -5   4  -2    1.60    0.33
   5  -4   2    1.61    0.18
   5  -4   2    1.69    0.17
   5  -4   2    1.47    0.28
  -6   4  -2   14.88    0.74
  -6   4  -2   15.65    0.71
  -6   4  -2   16.49    1.04
   6  -4   2   15.00    0.91
   6  -4   2   15.21    0.74
   6  -4   2   16.41    0.74
  -7   4  -2    1.24    0.19
  -7   4  -2    1.87    0.47
   7  -4   2    1.42    0.24
   7  -4   2    2.22    0.40
  -8   4  -2    2.78    0.56
   8  -4   2    2.89    0.37
   8  -4   2    2.32    0.47
  -9   4  -2    0.03    0.28
   9  -4   2    0.36    0.31
   9  -4   2    0.22    0.20
 -10   4  -2    1.14    0.46
  10  -4   2    0.54    0.37
  10  -4   2    0.39    0.24
  10   3  -2    0.38    0.37
  10   3  -2    0.77    0.40
 -10  -3   2    1.19    0.52
 -10  -3   2    0.61    0.40
   9   3  -2    1.86    0.43
   9   3  -2    1.61    0.46
  -9  -3   2    1.00    0.41
  -9  -3   2    0.98    0.43
   8   3  -2    7.10    0.73
   8   3  -2    5.93    0.75
  -8  -3   2    6.04    0.77
  -8  -3   2    5.77    0.72
   7   3  -2   12.08    0.65
   7   3  -2   12.22    0.81
   7   3  -2   11.75    0.89
  -7  -3   2   13.23    0.96
  -7  -3   2   12.47    0.89
  -7  -3   2   11.75    0.64
   6   3  -2    3.49    0.51
   6   3  -2    4.00    0.46
   6   3  -2    4.04    0.37
  -6  -3   2    5.83    0.65
  -6  -3   2    4.05    0.52
  -6  -3   2    3.60    0.37
   5   3  -2   32.85    1.44
   5   3  -2   34.18    1.38
   5   3  -2   31.26    1.55
  -5  -3   2   30.91    1.58
  -5  -3   2   32.63    1.37
  -5  -3   2   31.45    1.53
   4   3  -2    2.01    0.31
   4   3  -2    1.93    0.25
   4   3  -2    2.33    0.28
  -4  -3   2    2.43    0.35
  -4  -3   2    2.54    0.33
  -4  -3   2    2.28    0.27
   3   3  -2    9.74    0.62
   3   3  -2    9.79    0.53
   3   3  -2   10.72    0.61
   3   3  -2   11.51    0.57
  -3  -3   2   11.12    0.57
  -3  -3   2   10.88    0.65
  -3  -3   2    9.90    0.58
  -3  -3   2   10.27    0.65
   2   3  -2    7.44    0.41
   2   3  -2    8.53    0.52
   2   3  -2    7.53    0.49
   2   3  -2    8.53    0.47
   2   3  -2    8.58    0.47
  -2  -3   2    9.41    0.53
  -2  -3   2    8.20    0.47
  -2  -3   2    8.74    0.38
  -2  -3   2    7.82    0.51
  -2  -3   2    7.60    0.46
   1   3  -2   62.66    2.52
   1   3  -2   67.49    2.50
   1   3  -2   67.47    2.56
   1   3  -2   66.36    2.53
  -1  -3   2   66.14    2.54
  -1  -3   2   63.43    2.52
  -1  -3   2   63.92    2.49
  -1  -3   2   63.68    2.55
  -1  -3   2   62.93    2.36
   0   3  -2   10.27    0.40
   0   3  -2   10.13    0.43
   0   3  -2   10.58    0.50
   0   3  -2    9.53    0.48
   0   3  -2   10.31    0.54
   0   3  -2   10.51    0.49
   0  -3   2   10.15    0.55
   0  -3   2    9.85    0.48
   0  -3   2   10.87    0.50
   0  -3   2   10.06    0.49
  -1   3  -2    0.19    0.09
  -1   3  -2    0.01    0.06
  -1   3  -2    0.01    0.08
  -1   3  -2    0.09    0.05
   1  -3   2    0.05    0.05
   1  -3   2   -0.01    0.02
   1  -3   2    0.01    0.08
   1  -3   2    0.03    0.06
   1  -3   2   -0.02    0.07
  -2   3  -2    0.00    0.07
  -2   3  -2    0.04    0.02
  -2   3  -2   -0.04    0.08
  -2   3  -2    0.08    0.08
  -2   3  -2    0.08    0.09
   2  -3   2    0.01    0.07
   2  -3   2    0.07    0.03
   2  -3   2    0.23    0.12
   2  -3   2    0.06    0.03
   2  -3   2   -0.11    0.08
  -3   3  -2    9.82    0.39
  -3   3  -2    9.65    0.54
  -3   3  -2    9.43    0.53
  -3   3  -2    9.95    0.52
   3  -3   2    9.66    0.41
   3  -3   2    8.98    0.41
   3  -3   2   10.65    0.55
   3  -3   2    9.97    0.55
  -4   3  -2   22.55    0.97
  -4   3  -2   22.99    1.02
  -4   3  -2   21.96    0.90
  -4   3  -2   22.72    0.90
   4  -3   2   20.93    1.03
   4  -3   2   22.31    0.91
   4  -3   2   21.91    0.92
  -5   3  -2    0.80    0.14
  -5   3  -2    0.76    0.15
  -5   3  -2    1.20    0.22
  -5   3  -2    0.51    0.23
   5  -3   2    0.68    0.14
   5  -3   2    1.09    0.25
  -6   3  -2    1.48    0.36
  -6   3  -2    2.11    0.26
  -6   3  -2    2.14    0.22
   6  -3   2    2.71    0.39
   6  -3   2    2.41    0.28
   6  -3   2    2.67    0.30
  -7   3  -2    1.22    0.37
  -7   3  -2    1.35    0.25
  -7   3  -2    1.72    0.17
   7  -3   2    1.60    0.28
   7  -3   2    1.89    0.38
   7  -3   2    2.11    0.29
  -8   3  -2    0.08    0.25
   8  -3   2   -0.01    0.15
   8  -3   2    0.62    0.30
  -9   3  -2    0.52    0.39
   9  -3   2    0.41    0.23
   9  -3   2    0.61    0.37
 -10   3  -2    0.61    0.41
  10  -3   2    0.42    0.28
  10  -3   2    1.74    0.46
  10   2  -2   -0.20    0.29
  10   2  -2   -0.28    0.25
 -10  -2   2    0.36    0.39
 -10  -2   2    0.54    0.38
   9   2  -2    1.01    0.37
   9   2  -2    0.60    0.36
  -9  -2   2    0.44    0.33
  -9  -2   2    0.35    0.33
   8   2  -2    0.20    0.26
   8   2  -2    0.20    0.25
  -8  -2   2   -0.10    0.26
  -8  -2   2   -0.10    0.20
   7   2  -2    2.35    0.42
   7   2  -2    1.78    0.21
   7   2  -2    1.31    0.32
  -7  -2   2    2.20    0.44
  -7  -2   2    1.52    0.38
  -7  -2   2    1.57    0.20
   6   2  -2    7.52    0.59
   6   2  -2    8.20    0.45
   6   2  -2    7.45    0.71
  -6  -2   2    8.57    0.67
  -6  -2   2    8.44    0.44
  -6  -2   2    6.19    0.68
   5   2  -2    7.96    0.45
   5   2  -2    7.32    0.53
   5   2  -2    8.46    0.61
  -5  -2   2    8.32    0.63
  -5  -2   2    7.16    0.57
  -5  -2   2    8.36    0.44
   4   2  -2   10.47    0.58
   4   2  -2   10.20    0.65
   4   2  -2   10.23    0.51
   4   2  -2   10.22    0.53
  -4  -2   2   10.50    0.64
  -4  -2   2   11.07    0.59
  -4  -2   2   10.66    0.52
  -4  -2   2   10.11    0.66
   3   2  -2    1.46    0.24
   3   2  -2    1.84    0.21
   3   2  -2    1.24    0.23
   3   2  -2    1.89    0.28
   3   2  -2    2.01    0.21
  -3  -2   2    1.74    0.26
  -3  -2   2    1.86    0.20
  -3  -2   2    1.32    0.24
  -3  -2   2    1.20    0.21
   2   2  -2   38.46    1.49
   2   2  -2   37.04    1.61
   2   2  -2   41.32    1.66
   2   2  -2   40.22    1.62
   2   2  -2   40.14    1.54
  -2  -2   2   38.84    1.61
  -2  -2   2   38.95    1.53
  -2  -2   2   36.64    1.63
  -2  -2   2   40.26    1.63
   1   2  -2   75.64    2.85
   1   2  -2   72.77    2.83
   1   2  -2   75.83    2.85
   1   2  -2   73.61    2.76
  -1  -2   2   74.08    2.83
  -1  -2   2   72.32    2.84
  -1  -2   2   72.32    2.76
  -1  -2   2   72.31    2.84
   0   2  -2   13.55    0.59
   0   2  -2   14.30    0.62
   0   2  -2   13.90    0.62
   0   2  -2   13.94    0.63
   0   2  -2   13.76    0.60
   0   2  -2   13.65    0.52
   0   2  -2   13.53    0.50
   0   2  -2   14.65    0.64
   0  -2   2   13.64    0.60
   0  -2   2   13.40    0.61
   0  -2   2   14.10    0.64
   0  -2   2   13.87    0.59
  -1   2  -2   50.31    1.86
  -1   2  -2   50.52    1.81
  -1   2  -2   49.17    1.82
  -1   2  -2   50.76    1.91
  -1   2  -2   50.80    1.85
  -1   2  -2   47.03    1.89
   1  -2   2   48.63    1.82
   1  -2   2   47.84    1.86
   1  -2   2   50.05    1.91
   1  -2   2   47.22    1.80
  -2   2  -2   13.06    0.59
  -2   2  -2   13.10    0.52
  -2   2  -2   12.91    0.61
  -2   2  -2   12.27    0.51
  -2   2  -2   12.62    0.59
  -2   2  -2   12.56    0.58
   2  -2   2   12.43    0.58
   2  -2   2   12.23    0.57
   2  -2   2   12.54    0.52
  -3   2  -2   21.63    0.90
  -3   2  -2   22.29    0.98
  -3   2  -2   22.02    0.93
  -3   2  -2   24.61    0.89
  -3   2  -2   21.70    0.95
  -3   2  -2   21.94    0.96
   3  -2   2   20.19    0.96
   3  -2   2   22.20    0.90
   3  -2   2   22.10    0.96
  -4   2  -2   24.10    1.03
  -4   2  -2   24.96    1.06
  -4   2  -2   25.11    1.02
  -4   2  -2   24.49    1.01
   4  -2   2   25.22    1.12
   4  -2   2   23.02    1.03
  -5   2  -2   10.21    0.73
  -5   2  -2   11.59    0.54
  -5   2  -2   12.38    0.61
  -5   2  -2   12.06    0.61
   5  -2   2   11.81    0.62
   5  -2   2   10.75    0.59
   5  -2   2   11.52    0.69
  -6   2  -2    0.30    0.13
  -6   2  -2    0.20    0.14
  -6   2  -2    0.22    0.21
  -6   2  -2    0.30    0.09
   6  -2   2   -0.03    0.11
   6  -2   2    0.38    0.16
   6  -2   2    0.24    0.19
  -7   2  -2    0.63    0.09
  -7   2  -2    0.59    0.20
  -7   2  -2    0.77    0.19
  -7   2  -2    0.84    0.31
   7  -2   2    0.20    0.22
   7  -2   2    0.33    0.19
   7  -2   2    0.39    0.19
  -8   2  -2    3.39    0.57
  -8   2  -2    3.27    0.42
   8  -2   2    3.11    0.42
   8  -2   2    2.69    0.47
  -9   2  -2    1.67    0.48
   9  -2   2    2.01    0.39
   9  -2   2    2.45    0.49
 -10   2  -2   -0.14    0.32
  10  -2   2    0.09    0.24
  10  -2   2    0.98    0.40
  10   1  -2   -0.08    0.28
  10   1  -2   -0.20    0.24
 -10  -1   2    0.38    0.34
   9   1  -2    1.27    0.40
   9   1  -2    1.49    0.43
  -9  -1   2    0.66    0.36
  -9  -1   2    1.34    0.41
   8   1  -2    3.29    0.53
   8   1  -2    2.87    0.47
  -8  -1   2    3.07    0.57
  -8  -1   2    2.42    0.48
   7   1  -2   10.11    0.77
   7   1  -2   11.75    0.78
  -7  -1   2   10.10    0.82
  -7  -1   2    9.15    0.77
   6   1  -2    5.73    0.56
   6   1  -2    6.11    0.32
   6   1  -2    5.73    0.59
  -6  -1   2    6.59    0.31
  -6  -1   2    5.00    0.58
  -6  -1   2    6.23    0.64
   5   1  -2   62.89    2.26
   5   1  -2   57.58    2.42
   5   1  -2   60.11    2.55
  -5  -1   2   60.98    2.24
  -5  -1   2   61.17    2.61
  -5  -1   2   59.11    2.57
   4   1  -2   16.61    0.84
   4   1  -2   16.91    0.91
   4   1  -2   18.80    0.96
   4   1  -2   18.51    0.76
  -4  -1   2   18.48    0.95
  -4  -1   2   17.59    0.73
  -4  -1   2   18.63    0.88
  -4  -1   2   17.35    0.94
   3   1  -2   53.94    2.18
   3   1  -2   49.68    2.13
   3   1  -2   50.53    2.16
   3   1  -2   51.05    2.02
   3   1  -2   52.34    1.98
   3   1  -2   53.44    1.96
  -3  -1   2   56.51    2.05
  -3  -1   2   52.85    1.96
  -3  -1   2   53.86    2.15
  -3  -1   2   52.18    2.16
  -3  -1   2   50.27    2.16
   2   1  -2   21.41    0.95
   2   1  -2   21.06    0.86
   2   1  -2   21.35    0.85
   2   1  -2   20.97    0.96
   2   1  -2   21.61    0.87
   2   1  -2   22.18    0.97
  -2  -1   2   21.32    0.85
  -2  -1   2   20.23    0.95
  -2  -1   2   20.87    0.86
  -2  -1   2   22.40    0.96
  -2  -1   2   20.36    0.96
   1   1  -2   37.76    1.49
   1   1  -2   35.97    1.48
   1   1  -2   36.14    1.35
   1   1  -2   37.72    1.41
   1   1  -2   37.04    1.42
   1   1  -2   35.73    1.47
  -1  -1   2   37.74    1.35
  -1  -1   2   36.15    1.37
  -1  -1   2   35.58    1.41
  -1  -1   2   36.52    1.48
  -1  -1   2   37.99    1.48
  -1  -1   2   36.83    1.48
   0   1  -2   43.37    1.66
   0   1  -2   44.85    1.68
   0   1  -2   41.44    1.66
   0  -1   2   42.99    1.59
   0  -1   2   43.02    1.58
   0  -1   2   45.84    1.69
   0  -1   2   44.85    1.69
  -1   1  -2   70.34    2.61
  -1   1  -2   67.19    2.49
  -1   1  -2   73.89    2.60
   1  -1   2   71.67    2.62
   1  -1   2   73.18    2.50
   1  -1   2   72.02    2.59
   1  -1   2   72.80    2.54
   1  -1   2   60.51    2.61
  -2   1  -2  162.06    6.03
  -2   1  -2  158.59    6.04
  -2   1  -2  170.82    5.92
  -2   1  -2  161.05    5.89
  -2   1  -2  173.06    5.72
   2  -1   2  160.99    6.04
   2  -1   2  162.49    5.71
   2  -1   2  162.78    5.91
   2  -1   2  164.52    5.89
  -3   1  -2    7.29    0.39
  -3   1  -2    6.35    0.35
  -3   1  -2    6.08    0.39
  -3   1  -2    5.93    0.33
  -3   1  -2    6.60    0.34
   3  -1   2    5.86    0.34
   3  -1   2    6.23    0.33
   3  -1   2    6.29    0.34
   3  -1   2    6.09    0.38
   3  -1   2    5.73    0.37
  -4   1  -2   15.43    0.70
  -4   1  -2   14.87    0.64
  -4   1  -2   14.01    0.70
   4  -1   2   14.50    0.75
   4  -1   2   14.68    0.71
   4  -1   2   14.43    0.70
   4  -1   2   14.88    0.64
  -5   1  -2   60.78    2.66
  -5   1  -2   62.89    2.32
  -5   1  -2   61.60    2.50
   5  -1   2   59.74    2.49
   5  -1   2   67.04    2.33
   5  -1   2   59.79    2.50
   5  -1   2   63.35    2.52
  -6   1  -2    0.33    0.22
  -6   1  -2    0.32    0.08
  -6   1  -2    0.21    0.14
   6  -1   2    0.25    0.15
   6  -1   2    0.31    0.20
   6  -1   2    0.41    0.19
  -7   1  -2    0.80    0.25
  -7   1  -2    0.68    0.29
   7  -1   2    1.00    0.26
   7  -1   2    0.67    0.22
   7  -1   2    0.42    0.23
  -8   1  -2    1.87    0.44
  -8   1  -2    2.69    0.41
   8  -1   2    3.14    0.50
   8  -1   2    1.92    0.36
  -9   1  -2    0.74    0.37
   9  -1   2    0.31    0.26
   9  -1   2    0.29    0.27
 -10   1  -2   -0.14    0.26
  10  -1   2   -0.04    0.23
  10  -1   2   -0.14    0.24
  10   0  -2    0.41    0.35
  10   0  -2    0.10    0.30
 -10   0   2    0.44    0.35
   9   0  -2    3.17    0.54
   9   0  -2    3.34    0.57
  -9   0   2    2.59    0.57
  -9   0   2    3.21    0.55
   8   0  -2    3.00    0.50
   8   0  -2    4.37    0.57
  -8   0   2    3.67    0.55
  -8   0   2    2.14    0.50
   7   0  -2   16.28    0.97
   7   0  -2   14.23    0.96
  -7   0   2   16.64    1.02
  -7   0   2   17.87    1.11
   6   0  -2    5.54    0.55
   6   0  -2    5.91    0.57
  -6   0   2    6.19    0.61
  -6   0   2    5.77    0.63
   5   0  -2    7.53    0.56
   5   0  -2    8.29    0.34
   5   0  -2    8.75    0.62
   5   0  -2    8.08    0.55
  -5   0   2    8.91    0.64
  -5   0   2    8.03    0.58
   4   0  -2  174.58    6.61
   4   0  -2  185.03    6.66
   4   0  -2  169.12    6.39
   4   0  -2  169.70    6.20
  -4   0   2  175.57    6.73
  -4   0   2  172.53    6.62
   3   0  -2    6.25    0.42
   3   0  -2    4.93    0.34
   3   0  -2    5.29    0.23
   3   0  -2    5.63    0.39
   3   0  -2    6.05    0.41
   3   0  -2    5.48    0.27
  -3   0   2    5.70    0.41
  -3   0   2    5.98    0.37
  -3   0   2    4.91    0.38
  -3   0   2    5.64    0.39
   2   0  -2   66.29    2.63
   2   0  -2   69.94    2.70
   2   0  -2   69.06    2.66
   2   0  -2   67.24    2.52
   2   0  -2   68.39    2.46
   2   0  -2   66.24    2.48
  -2   0   2   66.36    2.68
  -2   0   2   68.47    2.48
  -2   0   2   66.63    2.65
  -2   0   2   71.48    2.65
  -2   0   2   68.14    2.53
   1   0  -2    0.84    0.09
   1   0  -2    0.57    0.11
   1   0  -2    0.81    0.13
   1   0  -2    0.76    0.11
   1   0  -2    0.79    0.13
  -1   0   2    0.69    0.12
  -1   0   2    0.33    0.08
  -1   0   2    0.61    0.11
  -1   0   2    0.80    0.13
  -1   0   2    0.83    0.09
  -1   0   2    0.60    0.09
   0   0   2    7.47    0.35
  -1   0  -2   44.97    1.87
  -1   0  -2   53.34    1.85
   1   0   2   50.50    1.83
   1   0   2   46.38    1.87
   1   0   2   48.69    1.76
   1   0   2   50.79    1.88
  -2   0  -2  959.01   34.04
  -2   0  -2  958.32   34.94
  -2   0  -2 1000.00   34.22
  -2   0  -2  926.91   34.91
  -2   0  -2  935.34   32.79
   2   0   2  904.07   35.10
   2   0   2  966.17   34.05
   2   0   2  943.82   32.98
   2   0   2  948.38   34.17
   2   0   2  962.82   35.16
  -3   0  -2  176.77    6.71
  -3   0  -2  179.69    6.46
  -3   0  -2  175.16    6.29
  -3   0  -2  189.00    6.56
  -3   0  -2  184.39    6.70
   3   0   2  175.95    6.70
   3   0   2  184.99    6.71
   3   0   2  180.33    6.46
   3   0   2  176.42    6.54
  -4   0  -2    5.36    0.38
  -4   0  -2    5.07    0.37
  -4   0  -2    4.86    0.40
  -4   0  -2    5.09    0.28
  -4   0  -2    4.69    0.34
   4   0   2    4.85    0.38
   4   0   2    4.47    0.34
   4   0   2    4.49    0.35
   4   0   2    4.79    0.28
  -5   0  -2    0.56    0.20
  -5   0  -2    0.46    0.18
  -5   0  -2    0.59    0.11
   5   0   2    0.66    0.12
   5   0   2    0.44    0.18
   5   0   2    0.71    0.18
   5   0   2    0.52    0.16
  -6   0  -2   33.26    1.49
  -6   0  -2   31.08    1.60
   6   0   2   32.22    1.25
   6   0   2   32.46    1.50
   6   0   2   30.19    1.46
   6   0   2   33.73    1.52
  -7   0  -2    4.99    0.54
  -7   0  -2    5.27    0.62
   7   0   2    6.05    0.60
   7   0   2    5.12    0.52
   7   0   2    5.09    0.27
   7   0   2    4.79    0.55
  -8   0  -2    3.28    0.54
  -8   0  -2    3.51    0.48
   8   0   2    3.62    0.53
   8   0   2    3.27    0.46
  -9   0  -2    5.79    0.68
  -9   0  -2    6.53    0.80
   9   0   2    5.04    0.61
   9   0   2    7.13    0.79
 -10   0  -2    0.67    0.38
  10   0   2    0.66    0.36
  10   0   2    0.70    0.36
  10  -1  -2    0.26    0.31
  10  -1  -2   -0.19    0.30
 -10   1   2    0.42    0.36
   9  -1  -2    0.54    0.32
   9  -1  -2    0.18    0.27
  -9   1   2   -0.13    0.26
   8  -1  -2    2.70    0.47
   8  -1  -2    1.96    0.43
  -8   1   2    2.63    0.47
  -8   1   2    2.73    0.53
   7  -1  -2    3.95    0.50
   7  -1  -2    3.62    0.50
  -7   1   2    4.40    0.52
  -7   1   2    4.70    0.63
   6  -1  -2    3.13    0.40
   6  -1  -2    2.64    0.39
  -6   1   2    3.45    0.43
  -6   1   2    3.47    0.50
   5  -1  -2    0.73    0.20
   5  -1  -2    0.55    0.20
   5  -1  -2    0.25    0.17
  -5   1   2    0.40    0.22
  -5   1   2    0.39    0.18
   4  -1  -2    6.75    0.45
   4  -1  -2    5.83    0.43
  -4   1   2    7.29    0.47
  -4   1   2    6.19    0.50
   3  -1  -2    3.15    0.30
   3  -1  -2    3.04    0.31
   3  -1  -2    3.41    0.28
   3  -1  -2    3.60    0.37
   3  -1  -2    2.98    0.17
  -3   1   2    2.63    0.32
  -3   1   2    2.85    0.30
  -3   1   2    3.09    0.17
  -3   1   2    3.55    0.28
  -3   1   2    3.71    0.33
   2  -1  -2   54.62    2.07
   2  -1  -2   55.30    2.13
   2  -1  -2   51.15    1.99
   2  -1  -2   52.68    1.92
   2  -1  -2   51.35    2.05
  -2   1   2   51.69    1.92
  -2   1   2   49.61    2.10
  -2   1   2   54.52    2.06
  -2   1   2   51.64    1.99
  -2   1   2   51.04    2.06
   1  -1  -2    0.17    0.07
   1  -1  -2    0.03    0.06
   1  -1  -2    0.09    0.06
   1  -1  -2    0.11    0.07
   1  -1  -2    0.09    0.06
   1  -1  -2   -0.01    0.04
  -1   1   2    0.03    0.07
  -1   1   2   -0.02    0.06
  -1   1   2    0.06    0.06
  -1   1   2    0.07    0.05
  -1   1   2    0.08    0.06
  -1   1   2    0.04    0.06
   0  -1  -2  129.53    4.81
  -1  -1  -2  157.71    5.50
  -1  -1  -2  157.61    5.67
  -1  -1  -2  156.39    5.27
   1   1   2  154.95    5.67
   1   1   2  138.97    5.26
   1   1   2  154.31    5.53
  -2  -1  -2  132.94    4.53
  -2  -1  -2  126.97    4.69
  -2  -1  -2  128.80    4.87
  -2  -1  -2  135.29    4.76
  -2  -1  -2  129.26    4.86
   2   1   2  133.07    4.87
   2   1   2  131.49    4.70
   2   1   2  125.56    4.52
   2   1   2  128.26    4.86
  -3  -1  -2  120.07    4.21
  -3  -1  -2  119.75    4.51
  -3  -1  -2  116.66    4.32
  -3  -1  -2  122.45    4.42
  -3  -1  -2  117.07    4.52
   3   1   2  124.12    4.53
   3   1   2  115.23    4.39
   3   1   2  121.34    4.32
   3   1   2  116.34    4.51
  -4  -1  -2   -0.05    0.10
  -4  -1  -2   -0.20    0.09
  -4  -1  -2   -0.08    0.06
  -4  -1  -2   -0.14    0.09
   4   1   2    0.27    0.13
   4   1   2    0.03    0.11
   4   1   2    0.05    0.13
   4   1   2    0.09    0.07
  -5  -1  -2   51.59    2.25
  -5  -1  -2   54.54    2.21
   5   1   2   48.41    2.15
   5   1   2   50.65    2.13
   5   1   2   54.33    2.20
   5   1   2   51.36    1.97
  -6  -1  -2    0.14    0.19
  -6  -1  -2    0.08    0.15
   6   1   2    0.18    0.09
   6   1   2    0.18    0.16
   6   1   2    0.01    0.16
   6   1   2    0.13    0.17
  -7  -1  -2    0.12    0.19
  -7  -1  -2    0.36    0.24
   7   1   2    0.22    0.10
   7   1   2   -0.07    0.17
   7   1   2    0.16    0.22
  -8  -1  -2    2.49    0.33
  -8  -1  -2    2.32    0.47
   8   1   2    1.86    0.41
   8   1   2    3.16    0.49
  -9  -1  -2    0.57    0.31
  -9  -1  -2    0.98    0.38
  -9  -1  -2    0.35    0.19
   9   1   2    0.70    0.33
   9   1   2    0.76    0.31
 -10  -1  -2    0.56    0.35
  10   1   2    0.72    0.32
  10   1   2    0.87    0.37
 -11  -1  -2    0.22    0.35
  11   1   2    0.68    0.35
  10  -2  -2    0.06    0.30
  10  -2  -2    0.14    0.26
 -10   2   2   -0.35    0.30
   9  -2  -2    0.12    0.27
   9  -2  -2   -0.02    0.22
  -9   2   2    0.42    0.34
   8  -2  -2    8.51    0.82
   8  -2  -2    8.17    0.78
  -8   2   2    8.48    0.70
  -8   2   2    9.25    0.97
   7  -2  -2    4.50    0.56
   7  -2  -2    5.51    0.57
  -7   2   2    4.12    0.50
  -7   2   2    5.05    0.67
   6  -2  -2    5.33    0.56
   6  -2  -2    4.68    0.52
   6  -2  -2    4.05    0.45
  -6   2   2    4.28    0.55
  -6   2   2    4.80    0.50
   5  -2  -2    0.16    0.13
   5  -2  -2    0.16    0.15
   5  -2  -2    0.38    0.18
  -5   2   2    0.22    0.16
  -5   2   2    0.14    0.18
   4  -2  -2   50.08    2.03
   4  -2  -2   48.35    1.99
   4  -2  -2   48.00    2.00
  -4   2   2   48.09    1.75
  -4   2   2   47.92    2.12
  -4   2   2   50.33    2.02
   3  -2  -2   59.28    2.14
   3  -2  -2   58.30    2.35
   3  -2  -2   57.76    2.32
   3  -2  -2   60.15    2.37
   3  -2  -2   60.61    2.47
  -3   2   2   61.19    2.17
  -3   2   2   59.17    2.45
  -3   2   2   60.48    2.33
  -3   2   2   60.45    2.36
  -3   2   2   58.00    2.34
   2  -2  -2  125.21    4.46
   2  -2  -2  128.30    4.78
   2  -2  -2  121.98    4.55
   2  -2  -2  123.64    4.66
   2  -2  -2  126.81    4.67
  -2   2   2  121.37    4.65
  -2   2   2  125.87    4.56
  -2   2   2  123.23    4.46
  -2   2   2  122.43    4.60
  -2   2   2  125.61    4.65
  -2   2   2  122.29    4.76
   1  -2  -2    2.77    0.21
   1  -2  -2    2.74    0.20
   1  -2  -2    2.85    0.21
   1  -2  -2    3.03    0.19
   1  -2  -2    2.67    0.17
   1  -2  -2    2.79    0.20
  -1   2   2    2.95    0.20
  -1   2   2    2.38    0.20
  -1   2   2    2.78    0.20
  -1   2   2    2.91    0.22
  -1   2   2    2.97    0.20
  -1   2   2    2.83    0.21
   0  -2  -2  142.24    5.58
   0  -2  -2  161.19    5.75
   0  -2  -2  157.91    5.71
   0  -2  -2  167.80    5.72
   0  -2  -2  161.79    5.55
   0   2   2  152.16    5.74
   0   2   2  154.80    5.71
   0   2   2  154.01    5.58
   0   2   2  136.32    5.70
  -1  -2  -2  197.74    6.75
  -1  -2  -2  200.16    7.17
  -1  -2  -2  193.85    7.18
  -1  -2  -2  194.98    6.96
  -1  -2  -2  192.59    7.00
   1   2   2  195.36    6.96
   1   2   2  189.26    6.65
   1   2   2  184.46    7.17
   1   2   2  198.37    7.00
   1   2   2  194.26    7.17
  -2  -2  -2    1.07    0.16
  -2  -2  -2    1.05    0.16
  -2  -2  -2    0.88    0.11
  -2  -2  -2    1.11    0.17
  -2  -2  -2    0.89    0.14
   2   2   2    1.05    0.17
   2   2   2    1.11    0.17
   2   2   2    1.09    0.16
   2   2   2    0.93    0.14
  -3  -2  -2   52.93    1.97
  -3  -2  -2   54.10    2.10
  -3  -2  -2   50.78    2.16
  -3  -2  -2   56.50    2.16
   3   2   2   54.47    2.05
   3   2   2   55.12    2.18
   3   2   2   51.47    2.15
  -4  -2  -2   11.70    0.66
  -4  -2  -2   10.49    0.66
   4   2   2   11.84    0.66
   4   2   2   13.33    0.70
   4   2   2   11.83    0.58
   4   2   2   11.80    0.66
  -5  -2  -2   47.62    2.11
  -5  -2  -2   47.81    2.10
   5   2   2   50.81    1.90
   5   2   2   46.82    2.02
   5   2   2   49.35    2.10
   5   2   2   48.33    2.08
  -6  -2  -2    0.23    0.20
  -6  -2  -2    0.57    0.25
   6   2   2    0.20    0.11
   6   2   2    0.23    0.20
   6   2   2    0.60    0.23
  -7  -2  -2    4.34    0.44
  -7  -2  -2    3.62    0.53
  -7  -2  -2    4.01    0.52
   7   2   2    4.40    0.32
   7   2   2    4.52    0.54
   7   2   2    4.17    0.52
  -8  -2  -2    2.04    0.44
  -8  -2  -2    2.05    0.31
  -8  -2  -2    2.16    0.42
   8   2   2    1.62    0.38
   8   2   2    2.37    0.44
  -9  -2  -2    0.92    0.25
  -9  -2  -2    1.20    0.42
  -9  -2  -2    1.04    0.40
   9   2   2    1.00    0.34
   9   2   2    0.93    0.34
 -10  -2  -2    4.61    0.69
 -10  -2  -2    4.60    0.71
  10   2   2    4.46    0.69
  10   2   2    4.84    0.68
  10  -3  -2    0.02    0.32
  10  -3  -2   -0.02    0.26
 -10   3   2    0.12    0.38
   9  -3  -2    0.28    0.31
   9  -3  -2    0.19    0.26
  -9   3   2   -0.12    0.33
   8  -3  -2   12.81    0.95
   8  -3  -2   13.36    0.89
  -8   3   2   13.03    1.07
   7  -3  -2   -0.03    0.16
   7  -3  -2   -0.21    0.18
  -7   3   2   -0.20    0.16
  -7   3   2    0.38    0.30
   6  -3  -2    2.25    0.39
   6  -3  -2    2.38    0.34
   6  -3  -2    3.03    0.41
  -6   3   2    2.43    0.34
  -6   3   2    2.59    0.45
   5  -3  -2    7.54    0.57
   5  -3  -2    7.14    0.49
   5  -3  -2    8.16    0.54
  -5   3   2    6.94    0.59
  -5   3   2    7.36    0.50
   4  -3  -2    0.61    0.16
   4  -3  -2    0.70    0.17
   4  -3  -2    0.78    0.21
  -4   3   2    0.86    0.18
  -4   3   2    0.82    0.10
  -4   3   2    0.66    0.21
   3  -3  -2   13.90    0.76
   3  -3  -2   12.87    0.66
   3  -3  -2   14.90    0.72
   3  -3  -2   13.68    0.68
   3  -3  -2   13.38    0.58
  -3   3   2   14.36    0.66
  -3   3   2   13.55    0.60
  -3   3   2   13.77    0.74
  -3   3   2   13.67    0.66
  -3   3   2   13.26    0.75
  -3   3   2   14.29    0.59
   2  -3  -2    6.17    0.40
   2  -3  -2    7.30    0.39
   2  -3  -2    6.55    0.37
   2  -3  -2    6.69    0.42
   2  -3  -2    6.67    0.35
  -2   3   2    6.45    0.41
  -2   3   2    7.27    0.42
  -2   3   2    6.94    0.37
  -2   3   2    6.99    0.36
  -2   3   2    7.32    0.37
  -2   3   2    6.66    0.35
  -2   3   2    6.41    0.42
   1  -3  -2  240.48    8.45
   1  -3  -2  238.22    8.71
   1  -3  -2  219.81    8.58
   1  -3  -2  240.56    8.38
   1  -3  -2  235.25    8.59
  -1   3   2  249.58    8.39
  -1   3   2  233.57    8.35
  -1   3   2  230.74    8.44
  -1   3   2  233.26    8.70
  -1   3   2  211.41    8.57
  -1   3   2  227.79    8.58
  -1   3   2  238.01    8.39
   0  -3  -2    0.26    0.07
   0  -3  -2    0.30    0.10
   0  -3  -2    0.12    0.09
   0  -3  -2    0.32    0.10
   0  -3  -2    0.25    0.10
   0   3   2    0.20    0.07
   0   3   2    0.45    0.11
   0   3   2    0.60    0.11
   0   3   2    0.49    0.11
   0   3   2    0.40    0.10
  -1  -3  -2    1.83    0.21
  -1  -3  -2    2.16    0.21
  -1  -3  -2    2.61    0.21
  -1  -3  -2    2.07    0.22
   1   3   2    1.91    0.21
   1   3   2    1.89    0.21
   1   3   2    2.31    0.22
   1   3   2    1.88    0.20
  -2  -3  -2    0.08    0.08
  -2  -3  -2    0.07    0.10
  -2  -3  -2    0.00    0.05
  -2  -3  -2    0.15    0.10
  -2  -3  -2    0.13    0.08
   2   3   2    0.09    0.09
   2   3   2    0.20    0.11
   2   3   2    0.04    0.10
   2   3   2    0.04    0.09
  -3  -3  -2  143.95    5.55
  -3  -3  -2  140.77    5.57
  -3  -3  -2  138.32    5.39
  -3  -3  -2  151.59    5.40
  -3  -3  -2  152.82    5.57
   3   3   2  150.57    5.58
   3   3   2  153.13    5.36
   3   3   2  144.18    5.55
   3   3   2  142.37    5.38
  -4  -3  -2    7.32    0.53
  -4  -3  -2    7.75    0.50
  -4  -3  -2    7.71    0.48
   4   3   2    8.35    0.54
   4   3   2    8.46    0.51
   4   3   2    7.79    0.46
   4   3   2    6.67    0.50
  -5  -3  -2    0.18    0.14
  -5  -3  -2    0.15    0.17
  -5  -3  -2    0.12    0.13
   5   3   2    0.24    0.19
   5   3   2    0.04    0.10
   5   3   2    0.23    0.17
  -6  -3  -2   17.27    0.86
  -6  -3  -2   15.80    0.94
  -6  -3  -2   15.59    0.97
   6   3   2   17.17    0.80
   6   3   2   15.56    0.92
   6   3   2   15.93    0.95
  -7  -3  -2    0.18    0.17
  -7  -3  -2    0.20    0.24
  -7  -3  -2    0.20    0.24
   7   3   2    0.10    0.24
   7   3   2    0.39    0.24
   7   3   2    0.33    0.16
  -8  -3  -2    0.15    0.17
  -8  -3  -2   -0.27    0.16
  -8  -3  -2    0.17    0.22
   8   3   2    0.09    0.23
   8   3   2    0.02    0.24
  -9  -3  -2    0.19    0.29
  -9  -3  -2    0.77    0.35
  -9  -3  -2    0.70    0.24
   9   3   2    0.69    0.34
   9   3   2    0.75    0.32
 -10  -3  -2    0.02    0.27
 -10  -3  -2    0.12    0.31
  10   3   2    0.10    0.30
  10   3   2    0.36    0.31
   9  -4  -2    0.20    0.32
   9  -4  -2    0.01    0.22
  -9   4   2    0.02    0.36
   8  -4  -2    0.26    0.24
   8  -4  -2    0.35    0.31
  -8   4   2    0.48    0.38
   7  -4  -2    1.17    0.35
   7  -4  -2    1.65    0.33
  -7   4   2    1.39    0.29
  -7   4   2    1.10    0.40
   6  -4  -2   10.93    0.70
   6  -4  -2   10.53    0.66
   6  -4  -2   10.31    0.75
  -6   4   2   10.25    0.82
  -6   4   2   10.71    0.65
   5  -4  -2    1.38    0.31
   5  -4  -2    0.76    0.19
   5  -4  -2    1.71    0.27
  -5   4   2    1.29    0.15
  -5   4   2    1.20    0.13
  -5   4   2    1.18    0.30
  -5   4   2    1.38    0.23
   4  -4  -2    9.63    0.47
   4  -4  -2    9.63    0.53
   4  -4  -2    9.29    0.54
   4  -4  -2    8.58    0.60
  -4   4   2    8.98    0.51
  -4   4   2    9.86    0.66
  -4   4   2    9.87    0.47
  -4   4   2    9.92    0.47
  -4   4   2    8.84    0.61
   3  -4  -2   44.19    1.76
   3  -4  -2   42.89    1.81
   3  -4  -2   39.77    1.67
   3  -4  -2   44.70    1.74
  -3   4   2   43.48    1.88
  -3   4   2   45.15    1.70
  -3   4   2   42.67    1.69
  -3   4   2   45.22    1.75
  -3   4   2   41.72    1.83
  -3   4   2   44.23    1.74
   2  -4  -2    1.51    0.19
   2  -4  -2    1.72    0.23
   2  -4  -2    1.54    0.18
   2  -4  -2    1.55    0.18
  -2   4   2    1.64    0.20
  -2   4   2    1.72    0.18
  -2   4   2    0.97    0.19
  -2   4   2    1.43    0.17
  -2   4   2    1.62    0.20
  -2   4   2    1.87    0.25
   1  -4  -2   36.71    1.46
   1  -4  -2   35.54    1.48
   1  -4  -2   35.73    1.45
   1  -4  -2   39.11    1.49
   1  -4  -2   37.48    1.45
  -1   4   2   37.01    1.46
  -1   4   2   36.16    1.47
  -1   4   2   35.57    1.48
  -1   4   2   36.15    1.44
  -1   4   2   33.49    1.43
  -1   4   2   35.60    1.47
   0  -4  -2   52.47    1.98
   0  -4  -2   49.83    2.03
   0  -4  -2   55.00    2.03
   0  -4  -2   54.38    2.03
   0  -4  -2   48.76    2.02
   0   4   2   48.79    2.01
   0   4   2   51.75    1.81
   0   4   2   55.23    2.05
   0   4   2   51.45    2.02
   0   4   2   51.12    2.03
   0   4   2   52.22    1.97
  -1  -4  -2    0.05    0.08
  -1  -4  -2    0.15    0.03
  -1  -4  -2    0.13    0.09
  -1  -4  -2    0.19    0.11
  -1  -4  -2    0.24    0.11
   1   4   2    0.10    0.10
   1   4   2    0.15    0.12
   1   4   2    0.46    0.12
   1   4   2    0.18    0.11
  -2  -4  -2    8.06    0.44
  -2  -4  -2    8.26    0.49
  -2  -4  -2    7.91    0.37
  -2  -4  -2    8.29    0.48
  -2  -4  -2    7.85    0.48
   2   4   2    7.57    0.47
   2   4   2    8.39    0.49
   2   4   2    7.32    0.44
  -3  -4  -2   18.67    0.88
  -3  -4  -2   19.51    0.92
  -3  -4  -2   17.33    0.92
  -3  -4  -2   19.24    0.85
  -3  -4  -2   17.09    0.80
   3   4   2   19.35    0.88
   3   4   2   15.92    0.82
   3   4   2   16.99    0.89
  -4  -4  -2  114.89    4.45
  -4  -4  -2  113.66    4.52
  -4  -4  -2  112.28    4.34
   4   4   2  111.61    4.49
   4   4   2  122.30    4.33
  -5  -4  -2   12.91    0.72
  -5  -4  -2   12.49    0.73
  -5  -4  -2   12.96    0.83
   5   4   2   12.23    0.75
   5   4   2   13.02    0.80
  -6  -4  -2    2.08    0.32
  -6  -4  -2    3.25    0.48
  -6  -4  -2    2.32    0.37
   6   4   2    2.93    0.45
   6   4   2    2.26    0.40
  -7  -4  -2    4.70    0.61
  -7  -4  -2    4.83    0.58
  -7  -4  -2    5.35    0.51
   7   4   2    5.61    0.64
   7   4   2    4.78    0.58
  -8  -4  -2    2.25    0.36
  -8  -4  -2    2.56    0.49
  -8  -4  -2    2.54    0.45
   8   4   2    2.51    0.47
   8   4   2    2.38    0.47
  -9  -4  -2    0.05    0.21
  -9  -4  -2   -0.07    0.25
   9   4   2    0.09    0.27
   9   4   2    0.17    0.29
 -10  -4  -2    3.83    0.69
 -10  -4  -2    1.87    0.51
  10   4   2    2.65    0.58
  10   4   2    3.09    0.61
   9  -5  -2    3.19    0.63
   9  -5  -2    4.22    0.54
  -9   5   2    3.05    0.61
  -9   5   2    4.05    0.72
   8  -5  -2   10.97    0.72
   8  -5  -2    9.64    0.94
  -8   5   2    7.27    0.85
  -8   5   2    8.39    0.95
   7  -5  -2    5.15    0.51
   7  -5  -2    5.70    0.68
  -7   5   2    4.91    0.66
  -7   5   2    4.06    0.62
   6  -5  -2    6.10    0.46
   6  -5  -2    6.15    0.49
   6  -5  -2    5.95    0.64
  -6   5   2    5.34    0.29
  -6   5   2    5.45    0.43
  -6   5   2    5.32    0.62
  -6   5   2    6.15    0.70
   5  -5  -2    0.24    0.13
   5  -5  -2    0.67    0.26
  -5   5   2    0.16    0.21
  -5   5   2    0.17    0.21
  -5   5   2    0.45    0.14
  -5   5   2    0.53    0.13
  -5   5   2    0.43    0.14
   4  -5  -2   10.59    0.54
   4  -5  -2    9.30    0.65
   4  -5  -2   10.17    0.55
   4  -5  -2    9.78    0.56
  -4   5   2   10.67    0.70
  -4   5   2    9.62    0.53
  -4   5   2   10.84    0.70
  -4   5   2   10.15    0.54
  -4   5   2   10.50    0.55
   3  -5  -2    2.14    0.23
   3  -5  -2    1.66    0.23
   3  -5  -2    1.96    0.23
   3  -5  -2    1.93    0.29
  -3   5   2    1.95    0.24
  -3   5   2    2.15    0.32
  -3   5   2    1.96    0.24
  -3   5   2    1.84    0.29
  -3   5   2    2.04    0.21
   2  -5  -2   10.03    0.51
   2  -5  -2    9.91    0.56
   2  -5  -2   10.57    0.58
   2  -5  -2   10.56    0.51
  -2   5   2    9.88    0.50
  -2   5   2   11.05    0.51
  -2   5   2    9.45    0.59
  -2   5   2   10.51    0.57
  -2   5   2    9.92    0.58
  -2   5   2    9.35    0.49
   1  -5  -2   55.91    2.18
   1  -5  -2   55.02    2.15
   1  -5  -2   52.58    2.15
   1  -5  -2   52.98    2.18
   1  -5  -2   56.17    2.20
  -1   5   2   56.70    2.19
  -1   5   2   57.79    2.15
  -1   5   2   51.88    2.18
  -1   5   2   55.85    2.17
  -1   5   2   57.09    2.15
  -1   5   2   54.54    1.99
   0  -5  -2  145.34    5.40
   0  -5  -2  137.76    5.41
   0  -5  -2  157.82    5.49
   0  -5  -2  141.27    5.48
   0   5   2  148.95    5.44
   0   5   2  144.32    5.02
   0   5   2  145.87    5.42
   0   5   2  142.36    5.39
   0   5   2  145.70    5.47
   0   5   2  152.32    5.49
  -1  -5  -2   58.18    2.22
  -1  -5  -2   55.97    2.16
  -1  -5  -2   52.09    2.20
  -1  -5  -2   55.87    2.23
   1   5   2   54.78    2.16
   1   5   2   54.06    2.21
   1   5   2   57.33    2.22
   1   5   2   55.01    2.23
  -2  -5  -2   29.83    1.09
  -2  -5  -2   28.29    1.20
  -2  -5  -2   25.45    1.25
  -2  -5  -2   31.74    1.29
  -2  -5  -2   27.73    1.28
   2   5   2   26.23    1.19
   2   5   2   28.08    1.27
  -3  -5  -2   15.47    0.79
  -3  -5  -2   13.71    0.75
  -3  -5  -2   13.87    0.69
  -3  -5  -2   12.27    0.76
  -3  -5  -2   13.23    0.62
   3   5   2   13.89    0.76
   3   5   2   13.10    0.69
  -4  -5  -2   -0.06    0.09
  -4  -5  -2   -0.04    0.12
  -4  -5  -2    0.20    0.17
   4   5   2    0.01    0.15
  -5  -5  -2    2.53    0.43
  -5  -5  -2    2.17    0.35
  -5  -5  -2    2.83    0.34
   5   5   2    2.25    0.37
  -6  -5  -2   -0.07    0.14
  -6  -5  -2    0.13    0.24
  -6  -5  -2   -0.12    0.15
   6   5   2    0.10    0.23
   6   5   2   -0.01    0.21
  -7  -5  -2   10.70    0.76
  -7  -5  -2   10.65    0.73
  -7  -5  -2   11.77    0.90
   7   5   2    9.42    0.81
   7   5   2   11.99    0.83
  -8  -5  -2    7.09    0.65
  -8  -5  -2    6.73    0.80
  -8  -5  -2    6.34    0.72
   8   5   2    6.92    0.76
   8   5   2    6.70    0.77
  -9  -5  -2   -0.19    0.21
  -9  -5  -2   -0.05    0.20
  -9  -5  -2    0.22    0.32
   9   5   2   -0.48    0.23
   9   5   2    0.00    0.28
 -10  -5  -2    3.90    0.70
 -10  -5  -2    2.08    0.53
  10   5   2    1.68    0.49
  10   5   2    1.38    0.47
   9  -6  -2   -0.02    0.33
   9  -6  -2    0.12    0.21
  -9   6   2   -0.03    0.31
  -9   6   2    0.48    0.40
   8  -6  -2    0.50    0.36
   8  -6  -2    1.38    0.29
  -8   6   2    0.64    0.37
  -8   6   2    1.23    0.44
   7  -6  -2    0.80    0.35
   7  -6  -2    1.45    0.28
  -7   6   2    1.36    0.42
  -7   6   2    1.56    0.43
   6  -6  -2   17.50    1.06
   6  -6  -2   16.97    0.86
  -6   6   2   15.83    1.05
   5  -6  -2    1.07    0.20
   5  -6  -2    1.00    0.30
   5  -6  -2    0.87    0.20
  -5   6   2    0.85    0.19
  -5   6   2    1.02    0.21
  -5   6   2    1.18    0.19
  -5   6   2    1.02    0.30
  -5   6   2    1.40    0.34
   4  -6  -2   10.32    0.71
   4  -6  -2   11.12    0.57
   4  -6  -2   10.36    0.61
  -4   6   2   11.66    0.75
  -4   6   2   10.61    0.61
  -4   6   2   11.30    0.55
  -4   6   2   11.41    0.76
  -4   6   2   11.58    0.63
   3  -6  -2   15.32    0.76
   3  -6  -2   13.92    0.67
  -3   6   2   14.14    0.80
  -3   6   2   13.57    0.80
  -3   6   2   14.69    0.66
   2  -6  -2   42.89    1.75
   2  -6  -2   39.22    1.66
  -2   6   2   41.19    1.78
  -2   6   2   43.16    1.66
  -2   6   2   40.31    1.75
  -2   6   2   43.16    1.61
   1  -6  -2  130.82    4.91
   1  -6  -2  130.44    4.92
   1  -6  -2  136.66    4.91
  -1   6   2  124.06    4.89
  -1   6   2  128.98    4.56
  -1   6   2  131.67    4.90
  -1   6   2  130.52    4.95
   0  -6  -2   33.03    1.48
   0  -6  -2   35.13    1.43
   0  -6  -2   36.17    1.46
   0  -6  -2   32.84    1.44
   0   6   2   32.76    1.30
   0   6   2   33.93    1.44
   0   6   2   33.47    1.22
   0   6   2   35.33    1.43
  -1  -6  -2    0.68    0.17
  -1  -6  -2    0.35    0.16
  -1  -6  -2    0.31    0.13
  -1  -6  -2    0.33    0.14
   1   6   2    0.36    0.14
   1   6   2    0.32    0.14
  -2  -6  -2    5.14    0.40
  -2  -6  -2    5.18    0.37
  -2  -6  -2    4.69    0.46
  -2  -6  -2    4.48    0.44
  -2  -6  -2    4.38    0.21
   2   6   2    4.61    0.43
   2   6   2    4.58    0.35
  -3  -6  -2    5.53    0.54
  -3  -6  -2    6.75    0.51
  -3  -6  -2    6.33    0.48
  -3  -6  -2    6.25    0.32
   3   6   2    5.69    0.42
   3   6   2    6.85    0.51
  -4  -6  -2    4.71    0.52
  -4  -6  -2    5.63    0.54
  -4  -6  -2    5.10    0.35
   4   6   2    4.93    0.52
  -5  -6  -2   10.73    0.79
  -5  -6  -2   11.92    0.66
  -5  -6  -2   10.47    0.72
   5   6   2   11.21    0.79
  -6  -6  -2    1.47    0.32
  -6  -6  -2    1.69    0.31
  -6  -6  -2    2.13    0.44
   6   6   2    1.74    0.40
   6   6   2    1.22    0.33
  -7  -6  -2    5.01    0.57
  -7  -6  -2    6.08    0.73
  -7  -6  -2    5.60    0.59
   7   6   2    6.21    0.68
   7   6   2    5.15    0.66
  -8  -6  -2    0.91    0.37
  -8  -6  -2    0.70    0.29
   8   6   2    1.03    0.37
   8   6   2    0.64    0.32
  -9  -6  -2    5.02    0.60
  -9  -6  -2    5.80    0.81
  -9  -6  -2    5.08    0.68
   9   6   2    4.80    0.72
   9   6   2    4.64    0.69
 -10  -6  -2   -0.17    0.35
 -10  -6  -2   -0.01    0.28
  10   6   2    0.16    0.36
  10   6   2    0.30    0.35
   8  -7  -2    0.61    0.37
   8  -7  -2    0.49    0.22
  -8   7   2    0.68    0.40
  -8   7   2    1.03    0.47
   7  -7  -2    0.09    0.29
   7  -7  -2    0.27    0.16
  -7   7   2   -0.39    0.22
  -7   7   2    0.06    0.23
   6  -7  -2   -0.38    0.21
   6  -7  -2    0.00    0.13
  -6   7   2   -0.18    0.23
  -6   7   2    0.00    0.23
   5  -7  -2    0.06    0.11
   5  -7  -2   -0.09    0.11
  -5   7   2    0.27    0.26
  -5   7   2    0.38    0.26
   4  -7  -2    1.10    0.19
   4  -7  -2    1.28    0.19
   4  -7  -2    1.21    0.24
  -4   7   2    1.05    0.29
  -4   7   2    1.30    0.17
  -4   7   2    1.11    0.28
   3  -7  -2    6.10    0.38
   3  -7  -2    6.92    0.49
   3  -7  -2    5.99    0.37
  -3   7   2    5.96    0.35
  -3   7   2    6.42    0.60
  -3   7   2    6.61    0.51
   2  -7  -2   56.91    2.38
   2  -7  -2   57.78    2.28
  -2   7   2   58.09    2.25
  -2   7   2   59.53    2.17
  -2   7   2   58.33    2.37
  -2   7   2   56.80    2.39
   1  -7  -2   37.18    1.47
   1  -7  -2   35.35    1.48
   1  -7  -2   33.31    1.56
  -1   7   2   34.81    1.33
  -1   7   2   36.56    1.46
  -1   7   2   33.41    1.52
  -1   7   2   34.41    1.44
   0  -7  -2    5.54    0.41
   0  -7  -2    6.54    0.40
   0  -7  -2    5.70    0.54
   0   7   2    4.76    0.45
   0   7   2    5.82    0.40
   0   7   2    5.67    0.26
   0   7   2    5.75    0.27
  -1  -7  -2   17.44    0.93
  -1  -7  -2   15.59    0.86
  -1  -7  -2   16.67    0.85
   1   7   2   16.73    0.83
   1   7   2   16.68    0.85
  -2  -7  -2    0.76    0.23
  -2  -7  -2    0.54    0.22
  -2  -7  -2    0.64    0.20
  -2  -7  -2    0.77    0.08
   2   7   2    0.71    0.20
   2   7   2    0.42    0.17
  -3  -7  -2    1.90    0.34
  -3  -7  -2    1.82    0.11
  -3  -7  -2    1.60    0.16
  -3  -7  -2    2.01    0.35
   3   7   2    1.66    0.26
   3   7   2    2.14    0.34
  -4  -7  -2    0.06    0.14
  -4  -7  -2    0.06    0.09
  -4  -7  -2    0.00    0.18
   4   7   2   -0.23    0.14
   4   7   2    0.03    0.18
  -5  -7  -2    0.12    0.18
  -5  -7  -2    0.25    0.13
  -5  -7  -2    0.10    0.22
   5   7   2    0.21    0.19
  -6  -7  -2    4.56    0.47
  -6  -7  -2    5.66    0.61
  -6  -7  -2    4.87    0.64
   6   7   2    4.09    0.57
   6   7   2    4.91    0.57
  -7  -7  -2    1.97    0.35
  -7  -7  -2    2.57    0.52
  -7  -7  -2    2.17    0.41
   7   7   2    2.49    0.48
   7   7   2    2.13    0.47
  -8  -7  -2    2.07    0.41
  -8  -7  -2    1.89    0.40
  -8  -7  -2    1.63    0.48
   8   7   2    1.96    0.49
   8   7   2    1.47    0.42
  -9  -7  -2    0.86    0.44
  -9  -7  -2    0.30    0.26
  -9  -7  -2    0.67    0.32
   9   7   2    0.97    0.41
   9   7   2    0.81    0.39
   8  -8  -2    0.19    0.18
   8  -8  -2   -0.01    0.34
  -8   8   2    0.30    0.36
  -8   8   2    0.65    0.43
   7  -8  -2    0.03    0.13
  -7   8   2    0.26    0.32
  -7   8   2    0.33    0.34
   6  -8  -2    0.27    0.13
  -6   8   2    0.09    0.28
  -6   8   2    0.02    0.17
   5  -8  -2   -0.06    0.09
   5  -8  -2    0.04    0.14
  -5   8   2   -0.33    0.21
  -5   8   2   -0.04    0.23
   4  -8  -2    5.26    0.34
   4  -8  -2    5.05    0.52
   4  -8  -2    4.63    0.33
  -4   8   2    4.28    0.56
  -4   8   2    5.11    0.57
   3  -8  -2   10.15    0.52
   3  -8  -2   10.04    0.67
   3  -8  -2   10.53    0.53
  -3   8   2    9.29    0.70
  -3   8   2    9.84    0.49
  -3   8   2    9.58    0.66
   2  -8  -2    0.06    0.11
   2  -8  -2   -0.02    0.04
   2  -8  -2    0.03    0.15
  -2   8   2   -0.10    0.13
  -2   8   2   -0.04    0.09
  -2   8   2    0.07    0.18
  -2   8   2    0.15    0.11
   1  -8  -2    0.16    0.16
   1  -8  -2    0.16    0.11
   1  -8  -2   -0.02    0.11
  -1   8   2   -0.02    0.16
  -1   8   2    0.06    0.10
  -1   8   2    0.19    0.10
  -1   8   2    0.24    0.10
   0  -8  -2    4.47    0.50
   0  -8  -2    3.83    0.39
   0  -8  -2    3.73    0.37
   0   8   2    4.25    0.44
   0   8   2    4.12    0.23
   0   8   2    4.32    0.35
  -1  -8  -2    1.85    0.29
  -1  -8  -2    0.92    0.27
  -1  -8  -2    1.29    0.28
   1   8   2    1.57    0.26
   1   8   2    1.61    0.27
  -2  -8  -2   33.94    1.22
  -2  -8  -2   33.20    1.60
  -2  -8  -2   37.49    1.61
  -2  -8  -2   32.63    1.62
   2   8   2   35.40    1.51
   2   8   2   34.29    1.57
  -3  -8  -2    6.41    0.63
  -3  -8  -2    5.47    0.29
  -3  -8  -2    6.08    0.62
   3   8   2    5.32    0.50
   3   8   2    6.16    0.59
  -4  -8  -2    8.10    0.43
  -4  -8  -2    7.50    0.73
  -4  -8  -2    8.30    0.79
  -4  -8  -2    8.02    0.39
   4   8   2    8.69    0.58
   4   8   2    8.88    0.68
  -5  -8  -2    8.36    0.78
  -5  -8  -2    9.16    0.50
  -5  -8  -2    7.83    0.81
   5   8   2    7.44    0.77
  -6  -8  -2    8.16    0.88
  -6  -8  -2    7.06    0.75
  -6  -8  -2    8.78    0.57
   6   8   2    8.31    0.84
  -7  -8  -2    2.50    0.47
  -7  -8  -2    2.03    0.35
  -7  -8  -2    2.70    0.55
   7   8   2    2.17    0.46
   7   8   2    2.44    0.51
  -8  -8  -2    0.08    0.22
  -8  -8  -2   -0.16    0.26
  -8  -8  -2   -0.43    0.22
   8   8   2    0.23    0.31
   8   8   2    0.11    0.30
  -9  -8  -2   -0.14    0.31
  -9  -8  -2    0.00    0.25
   9   8   2   -0.05    0.30
   9   8   2    0.27    0.33
  -7   9   2    1.42    0.45
  -7   9   2    1.07    0.44
  -6   9   2    0.09    0.27
  -6   9   2   -0.59    0.19
   5  -9  -2    0.02    0.09
   5  -9  -2   -0.04    0.15
  -5   9   2    0.24    0.26
  -5   9   2   -0.07    0.22
   4  -9  -2    0.04    0.10
   4  -9  -2    0.46    0.24
  -4   9   2    0.33    0.25
  -4   9   2   -0.02    0.24
   3  -9  -2   29.76    1.25
   3  -9  -2   28.15    1.44
   3  -9  -2   29.54    1.24
  -3   9   2   29.34    1.42
  -3   9   2   31.13    1.50
   2  -9  -2    4.59    0.54
   2  -9  -2    3.83    0.35
   2  -9  -2    3.59    0.34
  -2   9   2    3.63    0.47
  -2   9   2    3.93    0.30
  -2   9   2    4.17    0.39
   1  -9  -2   19.41    0.96
   1  -9  -2   19.24    0.94
   1  -9  -2   20.24    1.12
  -1   9   2   20.24    0.93
  -1   9   2   19.86    0.83
  -1   9   2   18.76    0.86
  -1   9   2   21.12    1.06
   0  -9  -2   19.24    1.01
   0  -9  -2   20.21    0.97
   0  -9  -2   19.59    1.12
   0   9   2   19.12    1.00
   0   9   2   19.02    0.96
  -1  -9  -2    0.75    0.27
  -1  -9  -2    1.07    0.25
  -1  -9  -2    0.72    0.23
   1   9   2    0.33    0.22
   1   9   2    0.85    0.24
  -2  -9  -2   26.34    0.94
  -2  -9  -2   29.14    1.38
  -2  -9  -2   25.22    1.38
  -2  -9  -2   28.25    1.33
   2   9   2   25.05    1.22
   2   9   2   23.86    1.28
  -3  -9  -2    2.82    0.46
  -3  -9  -2    1.98    0.40
  -3  -9  -2    2.60    0.17
   3   9   2    2.25    0.34
   3   9   2    2.44    0.39
  -4  -9  -2    0.21    0.25
  -4  -9  -2    0.05    0.22
  -4  -9  -2    0.23    0.11
   4   9   2    0.01    0.20
   4   9   2    0.26    0.24
  -5  -9  -2    8.64    0.49
  -5  -9  -2    7.89    0.84
  -5  -9  -2    8.64    0.84
   5   9   2    7.66    0.80
  -6  -9  -2   -0.28    0.21
  -6  -9  -2    0.08    0.29
   6   9   2   -0.46    0.19
  -7  -9  -2    1.14    0.37
  -7  -9  -2    1.05    0.42
   7   9   2    1.74    0.46
   7   9   2    1.35    0.41
  -8  -9  -2    0.41    0.37
  -8  -9  -2   -0.26    0.20
   8   9   2   -0.17    0.32
   8   9   2    0.47    0.36
  -6  10   2    0.22    0.31
  -6  10   2   -0.21    0.27
   5 -10  -2    0.01    0.18
  -5  10   2   -0.17    0.24
  -5  10   2    0.17    0.30
   4 -10  -2    0.33    0.25
   4 -10  -2    0.36    0.09
  -4  10   2    0.65    0.28
  -4  10   2    0.63    0.31
   3 -10  -2    2.11    0.24
   3 -10  -2    1.72    0.39
  -3  10   2    2.10    0.35
  -3  10   2    1.65    0.39
   2 -10  -2    1.41    0.34
   2 -10  -2    1.93    0.27
  -2  10   2    1.56    0.36
  -2  10   2    2.32    0.28
   1 -10  -2    0.46    0.20
   1 -10  -2    0.59    0.29
  -1  10   2    0.49    0.24
  -1  10   2    0.39    0.11
   0 -10  -2    0.73    0.30
   0 -10  -2    0.99    0.25
   0  10   2    1.22    0.29
   0  10   2    1.32    0.26
  -1 -10  -2    0.13    0.24
  -1 -10  -2   -0.17    0.18
   1  10   2    0.19    0.19
   1  10   2    0.07    0.19
  -2 -10  -2    0.43    0.26
  -2 -10  -2    0.95    0.30
   2  10   2    1.07    0.28
   2  10   2    1.13    0.29
  -3 -10  -2    1.04    0.35
  -3 -10  -2    0.54    0.30
   3  10   2    0.63    0.27
   3  10   2    0.92    0.27
  -4 -10  -2    9.35    0.91
  -4 -10  -2    8.49    0.88
   4  10   2   10.66    0.72
   4  10   2   11.19    0.83
  -5 -10  -2   10.03    0.95
  -5 -10  -2    9.28    0.95
   5  10   2   10.80    0.86
  -6 -10  -2   -0.54    0.21
  -6 -10  -2    0.16    0.26
   6  10   2   -0.33    0.22
  -7 -10  -2    1.24    0.40
  -7 -10  -2    1.50    0.50
   7  10   2    0.93    0.41
   7  10   2    0.65    0.39
  -8 -10  -2    0.09    0.37
  -8 -10  -2    0.08    0.28
   8  10   2    0.06    0.32
   8  10   2   -0.54    0.27
  -6  11   2    0.07    0.31
   5 -11  -2    0.02    0.23
  -5  11   2   -0.05    0.30
   4 -11  -2    1.05    0.35
  -4  11   2    0.86    0.37
   3 -11  -2    2.74    0.25
   3 -11  -2    2.52    0.47
  -3  11   2    2.70    0.48
   2 -11  -2    0.26    0.26
   2 -11  -2    0.13    0.15
  -2  11   2    0.38    0.26
   1 -11  -2    3.50    0.41
   1 -11  -2    4.66    0.63
  -1  11   2    4.11    0.52
   0 -11  -2    0.57    0.30
   0 -11  -2    0.68    0.24
   0  11   2    0.34    0.23
  -1 -11  -2    2.10    0.39
  -1 -11  -2    2.34    0.47
   1  11   2    1.69    0.33
  -2 -11  -2    0.18    0.21
  -2 -11  -2   -0.03    0.25
   2  11   2    0.17    0.21
  -3 -11  -2    0.44    0.26
  -3 -11  -2    0.61    0.34
   3  11   2    0.23    0.23
   3  11   2    0.14    0.26
  -4 -11  -2    3.19    0.56
  -4 -11  -2    2.24    0.51
   4  11   2    3.48    0.54
   4  11   2    2.93    0.42
  -5 -11  -2    8.04    0.92
  -5 -11  -2    9.41    0.98
   5  11   2    8.24    0.87
  -6 -11  -2    0.32    0.37
  -6 -11  -2   -0.16    0.25
  -7 -11  -2   -0.30    0.25
  -7 -11  -2   -0.29    0.28
   7  11   2    0.05    0.33
   7  11   2   -0.22    0.30
   4 -12  -2    1.34    0.41
  -4  12   2    1.50    0.43
   3 -12  -2    0.16    0.29
  -3  12   2    0.31    0.27
   2 -12  -2    0.63    0.31
   2 -12  -2    0.29    0.15
  -2  12   2    0.05    0.24
   1 -12  -2    0.80    0.35
   1 -12  -2    1.53    0.28
  -1  12   2    1.41    0.36
   0 -12  -2    0.24    0.22
   0 -12  -2    0.20    0.22
   0  12   2    0.24    0.25
  -1 -12  -2    0.49    0.26
  -1 -12  -2    0.42    0.32
   1  12   2    0.36    0.25
  -2 -12  -2    0.05    0.22
  -2 -12  -2    0.09    0.25
   2  12   2    0.24    0.22
  -3 -12  -2    0.92    0.39
  -3 -12  -2    1.04    0.38
   3  12   2    1.40    0.34
  -4 -12  -2    0.60    0.36
  -4 -12  -2    0.08    0.27
   4  12   2   -0.09    0.20
  -5 -12  -2    0.49    0.36
  -5 -12  -2    0.17    0.35
  -6 -12  -2    2.62    0.60
  -6 -12  -2    2.28    0.58
   3 -13  -2   -0.06    0.30
  -3  13   2    0.36    0.32
   2 -13  -2   -0.51    0.17
  -2  13   2   -0.18    0.29
   1 -13  -2    2.08    0.49
   1 -13  -2    1.87    0.31
  -1  13   2    1.63    0.41
   0 -13  -2    2.94    0.43
   0 -13  -2    2.15    0.52
   0  13   2    2.91    0.48
  -1 -13  -2    1.02    0.41
  -1 -13  -2    1.19    0.34
   1  13   2    0.38    0.26
  -2 -13  -2    0.31    0.26
  -2 -13  -2   -0.18    0.27
  -3 -13  -2    1.09    0.46
  -3 -13  -2    2.88    0.53
  -4 -13  -2    8.39    1.01
  -4 -13  -2    7.04    0.87
  -3 -12   3    0.75    0.38
  -3 -12   3    0.40    0.39
  -2 -12   3    4.32    0.60
  -2 -12   3    3.28    0.68
  -1 -12   3    0.91    0.30
  -1 -12   3    1.15    0.46
   0 -12   3    0.04    0.18
   0 -12   3    0.03    0.30
   1 -12   3    0.74    0.41
   1 -12   3    1.13    0.22
  -2  12  -3    0.61    0.37
   2 -12   3    0.00    0.22
   2 -12   3    0.26    0.33
  -3  12  -3    0.32    0.38
   3 -12   3   -0.11    0.19
   3 -12   3    0.49    0.38
  -5 -11   3   -0.14    0.30
  -4 -11   3    0.29    0.28
  -4 -11   3    0.79    0.38
  -4 -11   3    1.16    0.45
  -3 -11   3    1.81    0.51
  -3 -11   3    1.48    0.32
  -3 -11   3    1.66    0.44
  -2 -11   3    0.33    0.20
  -2 -11   3   -0.22    0.28
  -2 -11   3   -0.25    0.20
  -1 -11   3    1.49    0.36
  -1 -11   3    0.93    0.40
  -1 -11   3    1.18    0.29
   0 -11   3    3.13    0.41
   0 -11   3    2.96    0.41
   0 -11   3    2.07    0.53
   1 -11   3    3.23    0.60
   1 -11   3    2.93    0.42
   1 -11   3    3.52    0.36
  -2  11  -3    0.18    0.29
   2 -11   3    0.89    0.28
   2 -11   3    0.48    0.29
  -3  11  -3    0.03    0.27
   3 -11   3    0.17    0.29
   3 -11   3    0.70    0.27
  -4  11  -3    1.33    0.43
  -5  11  -3    0.41    0.30
   6  10  -3    1.18    0.47
  -6 -10   3    1.51    0.51
  -6 -10   3    1.65    0.47
  -6 -10   3    1.39    0.36
   5  10  -3    0.82    0.45
  -5 -10   3    2.03    0.48
  -5 -10   3    1.32    0.43
  -5 -10   3    1.83    0.37
  -4 -10   3    1.73    0.47
  -4 -10   3    2.07    0.38
  -4 -10   3    2.40    0.50
  -3 -10   3    2.47    0.38
  -3 -10   3    3.02    0.52
  -3 -10   3    2.06    0.50
  -2 -10   3    4.93    0.70
  -2 -10   3    4.29    0.56
  -2 -10   3    5.85    0.53
  -1 -10   3    0.63    0.23
  -1 -10   3    0.53    0.24
  -1 -10   3    0.68    0.36
   0 -10   3    0.42    0.32
   0 -10   3    0.64    0.22
   0 -10   3    0.66    0.22
   1 -10   3    4.68    0.67
   1 -10   3    4.19    0.39
   1 -10   3    3.98    0.46
  -2  10  -3   -0.17    0.14
   2 -10   3   -0.15    0.24
   2 -10   3    0.09    0.06
   2 -10   3   -0.07    0.16
  -3  10  -3    2.10    0.34
  -3  10  -3    2.29    0.48
  -3  10  -3    1.61    0.36
   3 -10   3    2.09    0.38
   3 -10   3    2.32    0.49
  -4  10  -3    4.21    0.62
  -4  10  -3    3.25    0.50
  -4  10  -3    3.63    0.47
  -5  10  -3    3.14    0.53
  -5  10  -3    2.70    0.46
  -5  10  -3    2.23    0.45
  -6  10  -3    0.25    0.31
  -6  10  -3    0.46    0.27
  -6  10  -3    0.04    0.28
   7   9  -3    2.59    0.54
   7   9  -3    2.75    0.61
  -7  -9   3    3.15    0.56
  -7  -9   3    3.46    0.55
  -7  -9   3    3.83    0.73
   6   9  -3   -0.27    0.31
  -6  -9   3    0.02    0.18
  -6  -9   3   -0.24    0.27
  -6  -9   3   -0.20    0.27
   5   9  -3    0.37    0.25
   5   9  -3    0.43    0.31
  -5  -9   3    1.80    0.45
  -5  -9   3    1.12    0.38
  -5  -9   3    0.35    0.26
   4   9  -3    1.32    0.36
   4   9  -3    1.00    0.29
  -4  -9   3    1.23    0.38
  -4  -9   3    1.14    0.40
  -4  -9   3    1.96    0.35
   3   9  -3   -0.24    0.20
  -3  -9   3    0.47    0.30
  -3  -9   3   -0.28    0.17
  -3  -9   3    0.23    0.19
   2   9  -3    1.51    0.35
  -2  -9   3    1.89    0.32
  -2  -9   3    2.79    0.50
  -2  -9   3    1.44    0.35
   1   9  -3   10.91    0.69
  -1  -9   3   10.29    0.64
  -1  -9   3   10.97    0.74
  -1  -9   3   12.00    0.89
   0   9  -3    6.29    0.34
   0  -9   3    5.80    0.71
   0  -9   3    6.50    0.50
   0  -9   3    6.24    0.49
  -1   9  -3    5.71    0.38
   1  -9   3    6.02    0.55
   1  -9   3    5.05    0.65
   1  -9   3    6.10    0.41
  -2   9  -3    4.75    0.43
   2  -9   3    4.09    0.25
   2  -9   3    4.09    0.25
   2  -9   3    4.60    0.49
   2  -9   3    4.35    0.62
  -3   9  -3   -0.03    0.15
  -3   9  -3    0.04    0.22
   3  -9   3   -0.11    0.20
   3  -9   3   -0.19    0.19
  -4   9  -3    0.13    0.20
  -4   9  -3    0.01    0.23
  -4   9  -3    0.05    0.24
   4  -9   3    0.30    0.25
  -5   9  -3   -0.03    0.22
  -5   9  -3    0.42    0.26
  -5   9  -3    0.29    0.26
  -6   9  -3    0.13    0.26
  -6   9  -3    0.08    0.25
  -6   9  -3    0.70    0.33
  -7   9  -3    0.34    0.29
  -7   9  -3    0.19    0.29
   7   8  -3    0.01    0.30
   7   8  -3    1.00    0.32
   7   8  -3    0.59    0.29
  -7  -8   3    0.43    0.28
  -7  -8   3    0.50    0.34
  -7  -8   3    0.64    0.40
   6   8  -3    2.89    0.55
   6   8  -3    3.83    0.48
  -6  -8   3    3.02    0.61
  -6  -8   3    3.08    0.48
  -6  -8   3    2.47    0.48
  -6  -8   3    2.87    0.45
   5   8  -3    0.36    0.30
   5   8  -3    0.13    0.21
  -5  -8   3    0.51    0.24
  -5  -8   3    0.61    0.33
  -5  -8   3    0.29    0.27
  -5  -8   3    0.26    0.20
   4   8  -3    5.30    0.50
   4   8  -3    4.92    0.61
  -4  -8   3    4.73    0.51
  -4  -8   3    4.31    0.59
  -4  -8   3    5.13    0.64
   3   8  -3    0.02    0.19
  -3  -8   3    0.19    0.23
  -3  -8   3    0.17    0.18
  -3  -8   3    0.28    0.24
   2   8  -3    0.00    0.15
  -2  -8   3   -0.02    0.20
  -2  -8   3    0.08    0.15
  -2  -8   3    0.63    0.28
  -2  -8   3    0.29    0.23
   1   8  -3    4.39    0.41
   1   8  -3    3.45    0.40
  -1  -8   3    3.90    0.55
  -1  -8   3    3.66    0.44
  -1  -8   3    5.08    0.50
  -1  -8   3    3.83    0.41
   0   8  -3   12.56    0.71
   0   8  -3   12.17    0.56
   0   8  -3   11.85    0.68
   0  -8   3   13.98    0.73
   0  -8   3   13.63    0.74
   0  -8   3   12.88    0.87
   0  -8   3   13.68    0.74
  -1   8  -3   28.45    1.13
  -1   8  -3   26.29    1.13
   1  -8   3   26.76    1.22
   1  -8   3   26.92    1.18
   1  -8   3   24.65    1.40
  -2   8  -3    1.25    0.22
   2  -8   3    0.68    0.30
   2  -8   3    1.05    0.13
   2  -8   3    1.21    0.14
   2  -8   3    0.82    0.23
  -3   8  -3    0.13    0.15
  -3   8  -3   -0.12    0.18
   3  -8   3    0.05    0.21
   3  -8   3    0.35    0.21
  -4   8  -3    1.69    0.36
  -4   8  -3    1.78    0.32
   4  -8   3    1.85    0.35
  -5   8  -3    0.23    0.24
  -5   8  -3    0.39    0.23
  -5   8  -3    0.16    0.21
  -6   8  -3    0.00    0.23
  -6   8  -3    0.10    0.21
  -6   8  -3    0.44    0.25
   6  -8   3   -0.11    0.24
  -7   8  -3    1.24    0.43
  -7   8  -3    0.44    0.29
   7  -8   3    0.57    0.34
  -8   8  -3    0.01    0.34
  -8   8  -3    0.24    0.30
   8  -8   3    0.15    0.30
   8   7  -3    3.11    0.51
   8   7  -3    3.18    0.66
   8   7  -3    3.58    0.55
  -8  -7   3    1.64    0.56
  -8  -7   3    3.24    0.57
   7   7  -3    0.51    0.28
   7   7  -3    0.26    0.24
   7   7  -3    0.52    0.37
  -7  -7   3    0.43    0.27
  -7  -7   3    0.26    0.27
  -7  -7   3    1.08    0.45
   6   7  -3    0.29    0.28
   6   7  -3    0.34    0.23
  -6  -7   3    0.02    0.20
  -6  -7   3   -0.13    0.25
  -6  -7   3   -0.08    0.19
   5   7  -3   -0.22    0.16
   5   7  -3   -0.08    0.23
  -5  -7   3   -0.21    0.18
  -5  -7   3    0.23    0.27
  -5  -7   3    0.11    0.19
   4   7  -3    2.04    0.31
   4   7  -3    1.35    0.35
  -4  -7   3    1.58    0.39
  -4  -7   3    1.69    0.31
  -4  -7   3    1.57    0.28
  -4  -7   3    1.99    0.39
   3   7  -3   12.46    0.80
  -3  -7   3   11.91    0.83
  -3  -7   3   12.12    0.81
  -3  -7   3   12.35    0.50
  -3  -7   3   11.12    0.68
   2   7  -3    0.24    0.18
   2   7  -3    0.32    0.15
  -2  -7   3   -0.10    0.16
  -2  -7   3    0.20    0.14
  -2  -7   3    0.09    0.19
  -2  -7   3    0.23    0.19
   1   7  -3    0.18    0.14
   1   7  -3    0.55    0.17
  -1  -7   3    0.26    0.21
  -1  -7   3    0.80    0.22
  -1  -7   3    0.49    0.18
  -1  -7   3    0.59    0.21
   0   7  -3   23.73    1.06
   0   7  -3   22.23    1.07
   0   7  -3   23.94    1.02
   0   7  -3   23.00    0.90
   0  -7   3   23.41    1.09
   0  -7   3   23.52    1.06
   0  -7   3   23.67    1.09
   0  -7   3   20.41    1.18
  -1   7  -3    3.35    0.25
  -1   7  -3    2.49    0.24
   1  -7   3    2.35    0.33
   1  -7   3    2.50    0.26
   1  -7   3    2.91    0.43
  -2   7  -3    1.75    0.24
   2  -7   3    2.08    0.17
   2  -7   3    1.69    0.36
   2  -7   3    1.84    0.17
   2  -7   3    1.47    0.27
  -3   7  -3    7.02    0.49
  -3   7  -3    6.99    0.65
   3  -7   3    6.87    0.52
   3  -7   3    6.74    0.68
  -4   7  -3    0.46    0.24
  -4   7  -3    0.44    0.20
   4  -7   3    0.35    0.22
  -5   7  -3    3.00    0.48
  -5   7  -3    3.37    0.44
   5  -7   3    2.86    0.43
  -6   7  -3    2.72    0.51
  -6   7  -3    3.32    0.45
   6  -7   3    4.26    0.56
  -7   7  -3    1.33    0.40
  -7   7  -3    0.52    0.24
   7  -7   3    0.87    0.33
  -8   7  -3   -0.31    0.33
   8  -7   3   -0.41    0.22
   8   6  -3    2.76    0.60
   8   6  -3    3.05    0.50
  -8  -6   3    2.71    0.51
  -8  -6   3    1.86    0.55
   7   6  -3    2.53    0.41
   7   6  -3    2.02    0.39
   7   6  -3    1.48    0.45
  -7  -6   3    1.30    0.34
  -7  -6   3    1.98    0.51
  -7  -6   3    0.90    0.36
   6   6  -3    0.64    0.25
   6   6  -3    0.60    0.25
   6   6  -3    0.51    0.31
  -6  -6   3    1.21    0.32
  -6  -6   3    0.17    0.29
  -6  -6   3    1.01    0.29
   5   6  -3    1.62    0.38
   5   6  -3    1.89    0.31
  -5  -6   3    1.88    0.43
  -5  -6   3    2.34    0.38
  -5  -6   3    2.69    0.40
   4   6  -3    0.12    0.15
   4   6  -3    0.32    0.23
  -4  -6   3    0.45    0.13
  -4  -6   3    0.62    0.28
  -4  -6   3    0.41    0.19
  -4  -6   3    0.30    0.22
   3   6  -3    0.50    0.16
   3   6  -3    0.25    0.18
  -3  -6   3    0.22    0.21
  -3  -6   3    0.35    0.09
  -3  -6   3    0.46    0.18
  -3  -6   3    0.22    0.19
  -3  -6   3    0.45    0.17
   2   6  -3   -0.11    0.13
   2   6  -3   -0.09    0.10
  -2  -6   3    0.23    0.20
  -2  -6   3    0.26    0.14
  -2  -6   3    0.09    0.15
  -2  -6   3    0.03    0.15
   1   6  -3    1.73    0.26
   1   6  -3    1.69    0.25
  -1  -6   3    1.83    0.28
  -1  -6   3    1.45    0.30
  -1  -6   3    1.78    0.26
  -1  -6   3    1.58    0.28
   0   6  -3    4.64    0.23
   0   6  -3    4.60    0.36
   0   6  -3    4.30    0.30
   0   6  -3    4.87    0.34
   0  -6   3    5.30    0.37
   0  -6   3    5.46    0.54
   0  -6   3    4.60    0.36
   0  -6   3    4.67    0.36
  -1   6  -3    0.58    0.12
  -1   6  -3    0.68    0.12
  -1   6  -3    0.28    0.12
   1  -6   3    0.71    0.14
   1  -6   3    0.72    0.18
   1  -6   3    0.44    0.21
  -2   6  -3    0.41    0.13
  -2   6  -3    0.37    0.18
  -2   6  -3    0.55    0.06
  -2   6  -3    0.55    0.06
   2  -6   3    0.55    0.10
   2  -6   3    0.73    0.19
   2  -6   3    0.78    0.22
   2  -6   3    0.71    0.10
  -3   6  -3   -0.01    0.16
   3  -6   3   -0.06    0.17
   3  -6   3    0.04    0.14
  -4   6  -3   -0.10    0.14
   4  -6   3    0.05    0.17
   4  -6   3    0.11    0.16
  -5   6  -3    3.14    0.48
  -5   6  -3    4.45    0.47
   5  -6   3    3.63    0.47
  -6   6  -3   21.64    1.30
  -6   6  -3   20.67    1.07
   6  -6   3   21.05    1.16
  -7   6  -3    0.37    0.34
  -7   6  -3    0.16    0.19
   7  -6   3    0.00    0.22
  -8   6  -3    0.25    0.32
   8  -6   3   -0.01    0.25
  -9   6  -3    0.39    0.36
   9  -6   3    0.19    0.32
   9   5  -3    1.72    0.43
   9   5  -3    1.60    0.51
  -9  -5   3    1.84    0.52
  -9  -5   3    2.02    0.57
   8   5  -3    7.17    0.88
   8   5  -3    6.83    0.74
  -8  -5   3    7.35    0.91
  -8  -5   3    7.85    0.87
   7   5  -3    4.20    0.48
   7   5  -3    3.41    0.60
   7   5  -3    3.96    0.50
  -7  -5   3    4.06    0.67
  -7  -5   3    3.77    0.57
  -7  -5   3    4.09    0.48
   6   5  -3    0.61    0.23
   6   5  -3    0.62    0.24
   6   5  -3    0.19    0.26
  -6  -5   3    0.36    0.22
  -6  -5   3    0.52    0.27
  -6  -5   3    0.65    0.33
   5   5  -3   15.85    1.01
   5   5  -3   16.64    0.86
  -5  -5   3   15.26    0.93
  -5  -5   3   16.07    0.89
  -5  -5   3   16.02    1.03
   4   5  -3    8.71    0.67
   4   5  -3    9.06    0.55
  -4  -5   3   10.03    0.64
  -4  -5   3    8.81    0.48
  -4  -5   3    8.48    0.70
  -4  -5   3    8.37    0.60
   3   5  -3    3.36    0.42
   3   5  -3    3.86    0.34
  -3  -5   3    3.95    0.40
  -3  -5   3    3.19    0.43
  -3  -5   3    4.05    0.24
  -3  -5   3    3.66    0.42
   2   5  -3    0.05    0.12
   2   5  -3   -0.07    0.12
  -2  -5   3    0.01    0.11
  -2  -5   3    0.09    0.03
  -2  -5   3    0.24    0.15
  -2  -5   3    0.14    0.16
  -2  -5   3    0.15    0.17
  -2  -5   3    0.15    0.16
   1   5  -3  125.58    4.67
   1   5  -3  118.71    4.64
  -1  -5   3  120.85    4.68
  -1  -5   3  126.72    4.68
  -1  -5   3  117.71    4.35
  -1  -5   3  116.36    4.62
   0   5  -3   24.77    1.07
   0   5  -3   23.05    0.88
   0   5  -3   23.73    0.96
   0   5  -3   22.77    1.03
   0  -5   3   23.77    1.15
   0  -5   3   22.82    1.06
   0  -5   3   23.77    1.03
   0  -5   3   24.97    1.07
  -1   5  -3    4.78    0.30
  -1   5  -3    4.25    0.26
  -1   5  -3    4.41    0.30
  -1   5  -3    4.80    0.28
   1  -5   3    4.77    0.35
   1  -5   3    4.64    0.30
   1  -5   3    4.36    0.45
  -2   5  -3    0.30    0.06
  -2   5  -3    0.15    0.06
  -2   5  -3    0.30    0.14
  -2   5  -3    0.24    0.12
   2  -5   3    0.25    0.07
   2  -5   3    0.33    0.08
   2  -5   3    0.34    0.18
   2  -5   3    0.35    0.15
  -3   5  -3   29.06    1.33
   3  -5   3   29.17    1.27
   3  -5   3   27.90    1.25
  -4   5  -3    6.12    0.47
   4  -5   3    5.41    0.52
   4  -5   3    6.40    0.47
  -5   5  -3    0.52    0.20
   5  -5   3    0.64    0.23
  -6   5  -3    0.36    0.27
  -6   5  -3    0.43    0.19
   6  -5   3    0.16    0.08
   6  -5   3    0.29    0.09
   6  -5   3    0.05    0.19
  -7   5  -3   15.69    0.83
  -7   5  -3   14.51    1.10
   7  -5   3   16.37    0.73
   7  -5   3   17.50    1.04
  -8   5  -3    0.11    0.29
   8  -5   3    0.50    0.16
   8  -5   3    0.48    0.30
  -9   5  -3    0.39    0.32
   9  -5   3    0.07    0.31
   9  -5   3    0.14    0.15
   9   4  -3    2.25    0.59
   9   4  -3    3.43    0.57
  -9  -4   3    1.82    0.50
  -9  -4   3    1.53    0.55
   8   4  -3    0.28    0.31
   8   4  -3    0.12    0.23
  -8  -4   3    0.09    0.31
  -8  -4   3   -0.17    0.22
   7   4  -3    2.46    0.40
   7   4  -3    1.99    0.45
   7   4  -3    1.99    0.32
  -7  -4   3    2.05    0.33
  -7  -4   3    1.58    0.46
  -7  -4   3    1.78    0.43
   6   4  -3    0.24    0.19
   6   4  -3    0.69    0.23
   6   4  -3    0.43    0.28
  -6  -4   3    0.44    0.26
  -6  -4   3    0.09    0.21
  -6  -4   3    0.43    0.20
   5   4  -3   14.22    0.77
   5   4  -3   14.61    0.80
   5   4  -3   13.02    0.88
  -5  -4   3   13.53    0.85
  -5  -4   3   11.98    0.90
  -5  -4   3   13.78    0.76
   4   4  -3   31.31    1.49
   4   4  -3   30.46    1.31
  -4  -4   3   31.04    1.36
  -4  -4   3   30.34    1.44
  -4  -4   3   28.57    1.50
   3   4  -3   17.06    0.78
   3   4  -3   15.53    0.90
  -3  -4   3   16.85    0.87
  -3  -4   3   16.03    0.93
  -3  -4   3   17.16    0.87
  -3  -4   3   17.33    0.73
   2   4  -3    3.86    0.41
   2   4  -3    4.13    0.34
   2   4  -3    4.21    0.27
  -2  -4   3    4.27    0.41
  -2  -4   3    3.73    0.37
  -2  -4   3    4.55    0.44
  -2  -4   3    4.29    0.39
  -2  -4   3    4.46    0.44
  -2  -4   3    4.47    0.21
   1   4  -3   47.46    1.96
   1   4  -3   48.82    1.96
  -1  -4   3   51.98    1.99
  -1  -4   3   46.68    1.84
  -1  -4   3   45.71    1.96
  -1  -4   3   45.86    1.97
   0   4  -3    2.54    0.17
   0   4  -3    2.95    0.30
   0   4  -3    2.46    0.27
   0   4  -3    2.30    0.24
   0   4  -3    2.62    0.26
   0  -4   3    2.03    0.24
   0  -4   3    2.84    0.29
   0  -4   3    2.56    0.26
   0  -4   3    2.67    0.33
  -1   4  -3    0.06    0.12
  -1   4  -3    0.24    0.09
  -1   4  -3    0.10    0.07
  -1   4  -3    0.19    0.09
  -1   4  -3    0.17    0.11
   1  -4   3    0.18    0.08
   1  -4   3    0.20    0.11
   1  -4   3    0.10    0.14
   1  -4   3    0.05    0.06
  -2   4  -3   60.53    2.21
  -2   4  -3   56.09    2.14
  -2   4  -3   55.63    2.29
   2  -4   3   58.44    2.16
   2  -4   3   56.20    2.16
   2  -4   3   56.59    2.18
   2  -4   3   56.25    2.18
   2  -4   3   58.31    2.33
  -3   4  -3    0.14    0.11
  -3   4  -3    0.06    0.12
   3  -4   3    0.06    0.04
   3  -4   3    0.03    0.12
   3  -4   3   -0.06    0.09
   3  -4   3    0.07    0.05
  -4   4  -3   20.26    0.96
   4  -4   3   19.90    0.79
   4  -4   3   20.18    0.96
   4  -4   3   19.40    0.97
   4  -4   3   19.04    0.78
  -5   4  -3    0.19    0.06
  -5   4  -3    0.17    0.06
  -5   4  -3    0.21    0.14
   5  -4   3    0.42    0.10
   5  -4   3   -0.05    0.17
   5  -4   3    0.29    0.09
  -6   4  -3   -0.20    0.23
  -6   4  -3    0.08    0.09
  -6   4  -3    0.32    0.16
   6  -4   3    0.11    0.10
   6  -4   3    0.19    0.23
   6  -4   3    0.16    0.12
  -7   4  -3    0.77    0.35
  -7   4  -3    0.81    0.20
   7  -4   3    0.65    0.28
   7  -4   3    1.00    0.20
  -8   4  -3    1.45    0.46
   8  -4   3    0.73    0.31
   8  -4   3    1.48    0.27
  -9   4  -3    0.70    0.38
   9  -4   3    1.44    0.29
   9  -4   3    1.22    0.38
 -10   4  -3    2.33    0.59
  10  -4   3    1.67    0.35
  10  -4   3    2.19    0.51
   9   3  -3    0.60    0.39
   9   3  -3    0.77    0.36
  -9  -3   3    1.39    0.45
  -9  -3   3    1.79    0.53
   8   3  -3   11.19    0.80
   8   3  -3    9.87    0.99
  -8  -3   3    9.21    0.95
  -8  -3   3    9.72    1.02
   7   3  -3    0.30    0.28
   7   3  -3    0.22    0.21
   7   3  -3    0.16    0.15
  -7  -3   3    0.11    0.25
  -7  -3   3   -0.01    0.13
  -7  -3   3    0.19    0.25
   6   3  -3   15.59    0.99
   6   3  -3   14.89    0.78
   6   3  -3   13.75    0.85
  -6  -3   3   15.34    0.99
  -6  -3   3   14.52    0.75
  -6  -3   3   15.78    1.03
   5   3  -3    0.66    0.20
   5   3  -3    0.60    0.19
   5   3  -3    0.55    0.27
   5   3  -3    0.31    0.15
  -5  -3   3    0.01    0.20
  -5  -3   3    0.19    0.16
  -5  -3   3    0.52    0.25
   4   3  -3   34.79    1.49
   4   3  -3   38.13    1.48
   4   3  -3   33.74    1.62
   4   3  -3   34.79    1.46
  -4  -3   3   35.11    1.47
  -4  -3   3   33.31    1.64
  -4  -3   3   34.47    1.60
   3   3  -3   40.42    1.63
   3   3  -3   40.73    1.75
   3   3  -3   38.53    1.64
   3   3  -3   37.87    1.56
  -3  -3   3   38.06    1.71
  -3  -3   3   41.52    1.78
  -3  -3   3   40.03    1.63
   2   3  -3   30.50    1.24
   2   3  -3   28.81    1.26
   2   3  -3   25.98    1.22
   2   3  -3   28.59    1.28
   2   3  -3   28.66    1.11
  -2  -3   3   27.35    1.22
  -2  -3   3   27.74    1.25
  -2  -3   3   30.38    1.30
  -2  -3   3   26.11    1.28
   1   3  -3    0.23    0.11
   1   3  -3    0.35    0.13
   1   3  -3    0.15    0.10
   1   3  -3    0.06    0.11
   1   3  -3    0.47    0.14
  -1  -3   3    0.15    0.11
  -1  -3   3    0.20    0.11
  -1  -3   3    0.29    0.12
  -1  -3   3    0.36    0.14
  -1  -3   3    0.22    0.12
   0   3  -3   12.46    0.59
   0   3  -3   11.21    0.46
   0   3  -3   11.59    0.61
   0   3  -3   11.73    0.56
   0   3  -3   10.18    0.59
   0   3  -3   10.95    0.55
   0   3  -3   11.72    0.59
   0  -3   3   12.19    0.58
   0  -3   3   11.10    0.56
   0  -3   3   11.26    0.62
   0  -3   3   10.90    0.57
  -1   3  -3   26.33    1.02
  -1   3  -3   26.87    1.06
  -1   3  -3   26.91    1.08
  -1   3  -3   27.81    1.16
  -1   3  -3   24.70    1.14
  -1   3  -3   25.33    1.06
   1  -3   3   25.20    1.06
   1  -3   3   25.61    1.06
   1  -3   3   26.21    1.01
   1  -3   3   25.27    1.06
   1  -3   3   25.09    1.15
  -2   3  -3  117.11    4.32
  -2   3  -3  115.42    4.35
  -2   3  -3  122.32    4.28
  -2   3  -3  114.25    4.37
  -2   3  -3  120.67    4.32
  -2   3  -3  117.18    4.18
   2  -3   3  114.56    4.18
   2  -3   3  115.83    4.26
   2  -3   3  112.70    4.32
  -3   3  -3   11.04    0.48
  -3   3  -3   11.69    0.60
  -3   3  -3   11.57    0.47
  -3   3  -3   10.08    0.59
   3  -3   3   12.01    0.62
   3  -3   3   10.82    0.48
   3  -3   3   10.28    0.48
   3  -3   3   11.26    0.58
  -4   3  -3    0.04    0.10
  -4   3  -3    0.13    0.07
  -4   3  -3    0.02    0.06
   4  -3   3   -0.04    0.13
   4  -3   3    0.16    0.08
   4  -3   3   -0.01    0.07
   4  -3   3   -0.08    0.11
  -5   3  -3    1.71    0.19
  -5   3  -3    1.43    0.22
   5  -3   3    2.09    0.23
   5  -3   3    1.99    0.31
  -6   3  -3    0.63    0.28
  -6   3  -3    0.80    0.17
  -6   3  -3    1.06    0.18
   6  -3   3    1.10    0.20
   6  -3   3    0.43    0.22
   6  -3   3    0.28    0.12
  -7   3  -3    0.56    0.18
  -7   3  -3    0.11    0.27
  -7   3  -3    0.33    0.13
   7  -3   3    0.16    0.21
   7  -3   3    0.17    0.16
   7  -3   3    0.25    0.15
  -8   3  -3    0.51    0.34
   8  -3   3    0.14    0.26
   8  -3   3    0.38    0.21
  -9   3  -3    1.84    0.52
   9  -3   3    2.70    0.52
   9  -3   3    2.47    0.39
 -10   3  -3   -0.08    0.32
  10  -3   3    0.36    0.34
  10  -3   3    0.04    0.21
   9   2  -3    1.08    0.36
   9   2  -3    1.71    0.48
  -9  -2   3    0.36    0.35
  -9  -2   3    1.26    0.45
   8   2  -3    1.50    0.41
   8   2  -3    1.08    0.34
  -8  -2   3    1.25    0.41
  -8  -2   3    0.61    0.36
   7   2  -3    0.41    0.27
   7   2  -3    0.50    0.15
   7   2  -3    0.19    0.23
  -7  -2   3    0.43    0.28
  -7  -2   3    0.51    0.30
   6   2  -3   12.59    0.74
   6   2  -3    9.98    0.78
   6   2  -3    9.98    0.58
  -6  -2   3   10.75    0.54
  -6  -2   3   13.33    0.86
  -6  -2   3   12.00    0.85
   5   2  -3    5.70    0.38
   5   2  -3    5.52    0.34
   5   2  -3    4.69    0.52
   5   2  -3    4.65    0.46
  -5  -2   3    5.27    0.34
  -5  -2   3    5.37    0.57
  -5  -2   3    4.61    0.56
   4   2  -3    9.99    0.51
   4   2  -3    9.62    0.54
   4   2  -3    9.73    0.56
   4   2  -3   10.42    0.67
  -4  -2   3    9.53    0.67
  -4  -2   3    8.97    0.63
  -4  -2   3    9.93    0.51
  -4  -2   3   10.29    0.56
   3   2  -3   20.86    0.94
   3   2  -3   21.55    0.91
   3   2  -3   20.97    0.90
   3   2  -3   20.05    1.02
  -3  -2   3   20.04    0.90
  -3  -2   3   19.75    1.04
  -3  -2   3   21.60    1.02
   2   2  -3  129.03    5.07
   2   2  -3  134.71    4.90
   2   2  -3  130.24    4.80
   2   2  -3  138.52    5.13
   2   2  -3  134.46    5.11
   2   2  -3  132.99    4.90
  -2  -2   3  143.43    5.11
  -2  -2   3  131.02    5.10
  -2  -2   3  127.74    4.89
  -2  -2   3  131.73    5.12
   1   2  -3   18.08    0.81
   1   2  -3   17.48    0.81
   1   2  -3   16.36    0.64
   1   2  -3   15.62    0.78
   1   2  -3   16.48    0.78
   1   2  -3   18.21    0.78
  -1  -2   3   16.96    0.81
  -1  -2   3   16.78    0.79
  -1  -2   3   16.76    0.65
  -1  -2   3   17.29    0.80
  -1  -2   3   16.56    0.77
  -1  -2   3   17.09    0.75
   0   2  -3    1.68    0.21
   0   2  -3    1.61    0.19
   0   2  -3    1.46    0.18
   0   2  -3    1.41    0.20
   0   2  -3    1.83    0.21
   0   2  -3    1.48    0.09
   0   2  -3    1.50    0.20
   0  -2   3    1.29    0.18
   0  -2   3    1.34    0.20
   0  -2   3    1.83    0.19
   0  -2   3    1.32    0.18
  -1   2  -3   25.72    1.06
  -1   2  -3   24.31    1.00
  -1   2  -3   23.81    1.05
  -1   2  -3   24.06    0.95
  -1   2  -3   25.04    1.00
  -1   2  -3   23.75    0.99
  -1   2  -3   25.16    0.95
   1  -2   3   25.34    1.00
   1  -2   3   24.76    1.00
   1  -2   3   24.80    1.05
   1  -2   3   22.90    0.93
   1  -2   3   24.90    1.01
  -2   2  -3    9.24    0.48
  -2   2  -3    9.94    0.48
  -2   2  -3    9.28    0.52
  -2   2  -3    9.94    0.44
  -2   2  -3    9.69    0.44
  -2   2  -3    8.66    0.50
   2  -2   3    9.17    0.51
   2  -2   3    9.36    0.44
   2  -2   3   10.22    0.47
   2  -2   3    9.68    0.50
  -3   2  -3   35.61    1.50
  -3   2  -3   37.13    1.54
  -3   2  -3   41.20    1.54
  -3   2  -3   38.10    1.47
  -3   2  -3   36.02    1.45
   3  -2   3   39.75    1.52
   3  -2   3   37.01    1.46
   3  -2   3   34.42    1.49
   3  -2   3   36.64    1.49
  -4   2  -3   24.74    1.02
  -4   2  -3   26.43    1.01
  -4   2  -3   25.39    1.05
   4  -2   3   24.11    1.02
   4  -2   3   19.80    1.00
   4  -2   3   25.19    1.04
   4  -2   3   23.06    1.07
   4  -2   3   23.72    1.09
  -5   2  -3    0.26    0.13
  -5   2  -3    0.14    0.10
   5  -2   3    0.27    0.13
   5  -2   3    0.37    0.18
   5  -2   3    0.47    0.14
  -6   2  -3    1.82    0.25
  -6   2  -3    1.76    0.22
  -6   2  -3    1.45    0.34
   6  -2   3    1.41    0.24
   6  -2   3    2.09    0.28
   6  -2   3    1.20    0.28
  -7   2  -3    0.06    0.15
  -7   2  -3   -0.29    0.18
  -7   2  -3    0.06    0.09
   7  -2   3    0.13    0.22
   7  -2   3   -0.06    0.14
   7  -2   3    0.13    0.16
  -8   2  -3    0.58    0.33
   8  -2   3    0.71    0.23
   8  -2   3    0.55    0.27
  -9   2  -3    6.05    0.81
   9  -2   3    6.41    0.75
   9  -2   3    6.03    0.63
 -10   2  -3    0.69    0.39
  10  -2   3   -0.15    0.29
  10  -2   3    0.14    0.23
  10   1  -3    0.29    0.35
  10   1  -3   -0.23    0.28
 -10  -1   3   -0.31    0.29
   9   1  -3    3.22    0.58
   9   1  -3    3.42    0.57
  -9  -1   3    3.06    0.59
  -9  -1   3    4.07    0.67
   8   1  -3    1.15    0.37
   8   1  -3    1.63    0.37
  -8  -1   3    0.85    0.35
  -8  -1   3    1.37    0.39
   7   1  -3    3.17    0.50
   7   1  -3    3.77    0.22
   7   1  -3    3.66    0.48
  -7  -1   3    3.88    0.55
  -7  -1   3    3.18    0.53
   6   1  -3    0.24    0.23
   6   1  -3    0.10    0.10
   6   1  -3    0.23    0.20
  -6  -1   3    0.49    0.24
  -6  -1   3    0.27    0.24
   5   1  -3    0.17    0.15
   5   1  -3    0.06    0.16
   5   1  -3    0.23    0.10
  -5  -1   3    0.20    0.19
  -5  -1   3    0.28    0.20
   4   1  -3    5.47    0.45
   4   1  -3    6.00    0.36
   4   1  -3    5.57    0.41
   4   1  -3    6.25    0.32
  -4  -1   3    5.60    0.32
  -4  -1   3    6.75    0.44
  -4  -1   3    6.91    0.51
  -4  -1   3    6.28    0.50
   3   1  -3   11.68    0.59
   3   1  -3   11.81    0.59
   3   1  -3   11.94    0.71
   3   1  -3   12.47    0.56
   3   1  -3   12.67    0.69
  -3  -1   3   12.83    0.71
  -3  -1   3   12.44    0.56
  -3  -1   3   12.31    0.71
  -3  -1   3   12.63    0.61
   2   1  -3    7.35    0.46
   2   1  -3    7.09    0.45
   2   1  -3    7.66    0.47
   2   1  -3    7.38    0.41
   2   1  -3    7.22    0.36
   2   1  -3    7.50    0.38
  -2  -1   3    7.02    0.45
  -2  -1   3    7.29    0.37
  -2  -1   3    7.00    0.37
  -2  -1   3    7.51    0.46
  -2  -1   3    6.86    0.45
   1   1  -3  147.50    5.28
   1   1  -3  149.15    5.47
   1   1  -3  139.19    5.27
   1   1  -3  145.16    5.17
   1   1  -3  144.97    5.51
   1   1  -3  148.60    5.45
  -1  -1   3  139.61    5.50
  -1  -1   3  151.04    5.46
  -1  -1   3  144.90    5.46
  -1  -1   3  147.58    5.28
  -1  -1   3  144.75    5.17
  -1  -1   3  140.30    5.22
   0   1  -3   32.76    1.31
   0   1  -3   31.95    1.18
   0   1  -3   29.21    1.26
   0   1  -3   31.62    1.26
   0   1  -3   31.17    1.28
   0   1  -3   32.00    1.29
   0   1  -3   33.59    1.22
   0  -1   3   29.98    1.28
   0  -1   3   29.79    1.17
   0  -1   3   31.23    1.28
   0  -1   3   32.91    1.28
   0  -1   3   32.30    1.22
  -1   1  -3    4.81    0.27
  -1   1  -3    4.80    0.28
  -1   1  -3    4.28    0.24
  -1   1  -3    4.07    0.25
  -1   1  -3    4.02    0.29
   1  -1   3    4.29    0.29
   1  -1   3    4.24    0.26
   1  -1   3    4.19    0.26
   1  -1   3    4.12    0.26
   1  -1   3    4.43    0.22
  -2   1  -3    0.30    0.09
  -2   1  -3    0.43    0.10
  -2   1  -3    0.38    0.10
  -2   1  -3    0.38    0.12
  -2   1  -3    0.45    0.11
   2  -1   3    0.44    0.10
   2  -1   3    0.81    0.12
   2  -1   3    0.34    0.10
   2  -1   3    0.28    0.10
   2  -1   3    0.43    0.12
  -3   1  -3    3.44    0.25
  -3   1  -3    3.61    0.24
  -3   1  -3    3.90    0.28
  -3   1  -3    4.18    0.31
  -3   1  -3    3.59    0.27
   3  -1   3    3.32    0.32
   3  -1   3    3.73    0.29
   3  -1   3    3.49    0.25
   3  -1   3    3.80    0.27
   3  -1   3    4.03    0.26
  -4   1  -3   11.54    0.60
  -4   1  -3   11.23    0.57
  -4   1  -3   12.41    0.59
   4  -1   3   12.62    0.59
   4  -1   3   11.75    0.64
   4  -1   3   11.78    0.60
   4  -1   3   11.17    0.59
   4  -1   3   12.06    0.64
  -5   1  -3    1.40    0.23
  -5   1  -3    0.72    0.15
   5  -1   3    1.15    0.21
   5  -1   3    1.06    0.17
   5  -1   3    1.20    0.25
   5  -1   3    1.04    0.21
  -6   1  -3    0.09    0.18
  -6   1  -3    0.43    0.17
  -6   1  -3    0.09    0.09
   6  -1   3   -0.03    0.11
   6  -1   3    0.02    0.12
   6  -1   3    0.19    0.10
   6  -1   3    0.19    0.20
  -7   1  -3   -0.12    0.19
  -7   1  -3    0.24    0.10
  -7   1  -3    0.06    0.16
   7  -1   3   -0.21    0.14
   7  -1   3   -0.15    0.12
   7  -1   3   -0.11    0.14
  -8   1  -3    4.52    0.65
  -8   1  -3    4.84    0.54
   8  -1   3    3.63    0.54
   8  -1   3    3.82    0.47
  -9   1  -3    1.14    0.41
   9  -1   3    1.57    0.41
   9  -1   3    1.54    0.36
 -10   1  -3    0.34    0.33
  10  -1   3    0.51    0.27
  10  -1   3    0.03    0.31
  10   0  -3    1.70    0.51
  10   0  -3    1.32    0.46
 -10   0   3    0.98    0.46
   9   0  -3   -0.29    0.25
   9   0  -3    0.32    0.30
  -9   0   3    0.06    0.31
  -9   0   3    0.17    0.31
   8   0  -3   -0.14    0.22
   8   0  -3   -0.16    0.20
  -8   0   3    0.05    0.25
  -8   0   3    0.00    0.24
   7   0  -3    3.69    0.51
   7   0  -3    3.87    0.49
  -7   0   3    3.87    0.56
  -7   0   3    3.33    0.51
   6   0  -3    2.85    0.43
   6   0  -3    3.27    0.43
   6   0  -3    3.07    0.16
  -6   0   3    3.37    0.49
  -6   0   3    3.18    0.45
   5   0  -3    2.32    0.35
   5   0  -3    2.56    0.18
   5   0  -3    1.80    0.30
  -5   0   3    2.58    0.38
  -5   0   3    1.74    0.34
   4   0  -3    2.69    0.34
   4   0  -3    2.67    0.20
   4   0  -3    2.21    0.28
   4   0  -3    2.58    0.35
  -4   0   3    2.53    0.36
  -4   0   3    2.89    0.37
   3   0  -3  321.77   11.58
   3   0  -3  326.00   11.66
   3   0  -3  316.28   12.07
   3   0  -3  341.92   12.12
   3   0  -3  329.95   11.62
  -3   0   3  330.00   11.67
  -3   0   3  318.05   12.09
  -3   0   3  319.96   12.24
   2   0  -3    0.18    0.08
   2   0  -3    0.14    0.11
   2   0  -3    0.10    0.09
   2   0  -3    0.10    0.10
   2   0  -3    0.22    0.07
   2   0  -3    0.27    0.09
  -2   0   3    0.19    0.09
  -2   0   3    0.11    0.08
  -2   0   3    0.29    0.12
  -2   0   3    0.13    0.10
  -2   0   3    0.15    0.12
  -2   0   3    0.27    0.09
   1   0  -3   23.23    0.96
   1   0  -3   21.54    0.87
   1   0  -3   20.60    0.88
   1   0  -3   21.71    0.94
   1   0  -3   20.43    0.82
   1   0  -3   20.59    0.93
  -1   0   3   21.40    0.89
  -1   0   3   21.33    0.86
  -1   0   3   21.38    0.94
  -1   0   3   21.19    0.83
  -1   0   3   21.01    0.94
  -1   0   3   21.77    0.93
   0   0  -3  165.66    6.12
   0   0  -3  172.64    6.40
   0   0  -3  172.90    6.32
   0   0  -3  173.43    6.33
   0   0  -3  170.01    6.13
   0   0   3  175.62    6.32
   0   0   3  172.88    6.14
   0   0   3  165.75    6.12
   0   0   3  168.16    5.91
   0   0   3  166.29    6.32
  -1   0  -3  133.75    4.65
  -1   0  -3  133.41    4.83
  -1   0  -3  134.93    4.97
  -1   0  -3  134.85    4.85
  -1   0  -3  126.66    4.96
   1   0   3  136.72    4.97
   1   0   3  130.77    4.83
   1   0   3  133.54    4.65
   1   0   3  138.36    4.85
   1   0   3  131.18    4.96
  -2   0  -3  353.55   12.85
  -2   0  -3  364.93   12.40
  -2   0  -3  370.52   13.25
  -2   0  -3  368.85   12.95
  -2   0  -3  350.12   13.25
   2   0   3  362.74   12.86
   2   0   3  350.06   12.40
   2   0   3  367.95   13.25
   2   0   3  355.03   13.24
   2   0   3  367.40   12.87
  -3   0  -3    6.78    0.39
  -3   0  -3    6.11    0.37
  -3   0  -3    6.41    0.37
  -3   0  -3    6.21    0.38
  -3   0  -3    6.19    0.38
  -3   0  -3    5.83    0.36
   3   0   3    6.63    0.37
   3   0   3    6.13    0.38
   3   0   3    5.70    0.36
   3   0   3    6.47    0.39
   3   0   3    5.94    0.37
  -4   0  -3   64.67    2.48
  -4   0  -3   65.15    2.60
   4   0   3   65.96    2.47
   4   0   3   65.56    2.59
   4   0   3   62.29    2.56
   4   0   3   69.48    2.61
  -5   0  -3   40.69    1.78
  -5   0  -3   42.46    1.64
   5   0   3   42.00    1.79
   5   0   3   37.79    1.75
   5   0   3   43.74    1.79
   5   0   3   43.68    1.65
  -6   0  -3    0.07    0.14
  -6   0  -3    0.08    0.15
  -6   0  -3    0.06    0.08
   6   0   3    0.03    0.15
   6   0   3   -0.01    0.12
   6   0   3   -0.10    0.13
   6   0   3   -0.12    0.07
  -7   0  -3    1.13    0.30
  -7   0  -3    1.19    0.34
   7   0   3    1.03    0.26
   7   0   3    1.24    0.29
   7   0   3    0.85    0.27
   7   0   3    1.16    0.17
  -8   0  -3    2.30    0.47
  -8   0  -3    1.67    0.35
   8   0   3    1.69    0.35
   8   0   3    2.32    0.44
  -9   0  -3    0.62    0.30
  -9   0  -3    1.06    0.40
   9   0   3    1.15    0.33
   9   0   3    0.49    0.32
 -10   0  -3   -0.29    0.24
  10   0   3   -0.11    0.26
  10   0   3    0.28    0.24
 -11   0  -3    0.48    0.36
  11   0   3    0.09    0.29
  10  -1  -3    0.27    0.34
  10  -1  -3    0.31    0.32
 -10   1   3    0.82    0.43
   9  -1  -3    0.21    0.30
   9  -1  -3    0.12    0.27
  -9   1   3    0.15    0.33
   8  -1  -3    2.00    0.42
   8  -1  -3    1.27    0.36
  -8   1   3    0.88    0.36
  -8   1   3    1.06    0.34
   7  -1  -3    0.05    0.21
   7  -1  -3   -0.03    0.18
  -7   1   3    0.02    0.19
  -7   1   3   -0.05    0.23
   6  -1  -3   21.99    1.17
   6  -1  -3   21.31    1.13
  -6   1   3   24.23    1.29
  -6   1   3   20.74    1.17
   5  -1  -3   26.85    1.30
   5  -1  -3   31.27    1.44
   5  -1  -3   28.02    1.05
   5  -1  -3   28.06    1.35
  -5   1   3   27.08    1.42
  -5   1   3   29.69    1.39
   4  -1  -3   -0.10    0.11
   4  -1  -3    0.12    0.12
   4  -1  -3   -0.09    0.11
   4  -1  -3    0.06    0.06
  -4   1   3   -0.19    0.11
  -4   1   3   -0.04    0.12
   3  -1  -3    5.57    0.32
   3  -1  -3    5.98    0.44
   3  -1  -3    6.54    0.44
   3  -1  -3    6.30    0.41
  -3   1   3    6.50    0.43
  -3   1   3    6.31    0.33
  -3   1   3    6.58    0.44
  -3   1   3    7.00    0.48
  -3   1   3    6.17    0.40
   2  -1  -3  151.20    5.63
   2  -1  -3  164.11    5.96
   2  -1  -3  159.76    5.87
   2  -1  -3  155.18    5.84
   2  -1  -3  151.04    5.59
  -2   1   3  160.68    5.85
  -2   1   3  157.78    5.94
  -2   1   3  153.67    5.64
  -2   1   3  149.35    5.85
  -2   1   3  152.67    5.59
  -2   1   3  156.16    5.70
   1  -1  -3   18.24    0.83
   1  -1  -3   18.01    0.77
   1  -1  -3   18.13    0.78
   1  -1  -3   18.99    0.83
   1  -1  -3   17.21    0.80
  -1   1   3   19.49    0.82
  -1   1   3   17.81    0.75
  -1   1   3   17.94    0.77
  -1   1   3   17.68    0.81
  -1   1   3   18.89    0.78
  -1   1   3   17.34    0.82
   0  -1  -3  204.83    7.38
   0  -1  -3  193.01    7.36
   0  -1  -3  196.86    7.17
   0  -1  -3  198.07    7.14
   0  -1  -3  204.23    7.45
   0   1   3  195.49    7.37
   0   1   3  207.46    7.15
   0   1   3  204.07    7.37
   0   1   3  195.71    7.18
   0   1   3  197.04    6.87
   0   1   3  194.09    7.44
  -1  -1  -3   40.08    1.67
  -1  -1  -3   42.23    1.67
  -1  -1  -3   42.48    1.54
  -1  -1  -3   43.59    1.63
  -1  -1  -3   42.03    1.64
   1   1   3   44.08    1.68
   1   1   3   41.58    1.67
   1   1   3   40.87    1.53
   1   1   3   43.02    1.64
   1   1   3   43.61    1.63
  -2  -1  -3   -0.09    0.05
  -2  -1  -3   -0.14    0.07
  -2  -1  -3    0.00    0.09
  -2  -1  -3    0.00    0.08
  -2  -1  -3   -0.05    0.07
   2   1   3    0.06    0.10
   2   1   3   -0.02    0.08
   2   1   3   -0.01    0.07
   2   1   3   -0.06    0.07
   2   1   3   -0.01    0.08
  -3  -1  -3    4.06    0.31
  -3  -1  -3    4.06    0.31
  -3  -1  -3    4.14    0.28
  -3  -1  -3    3.34    0.28
  -3  -1  -3    4.09    0.27
   3   1   3    3.17    0.31
   3   1   3    3.56    0.29
   3   1   3    3.42    0.26
   3   1   3    3.39    0.26
   3   1   3    3.89    0.30
  -4  -1  -3   82.03    3.33
  -4  -1  -3   84.00    3.16
  -4  -1  -3   84.92    3.10
   4   1   3   89.70    3.17
   4   1   3   82.73    3.25
   4   1   3   88.59    3.34
   4   1   3   81.24    3.31
  -5  -1  -3    4.20    0.43
  -5  -1  -3    5.34    0.33
  -5  -1  -3    3.90    0.45
   5   1   3    4.41    0.32
   5   1   3    4.42    0.42
   5   1   3    5.05    0.47
   5   1   3    3.80    0.42
  -6  -1  -3    2.16    0.36
  -6  -1  -3    2.62    0.41
   6   1   3    2.02    0.32
   6   1   3    3.33    0.43
   6   1   3    2.70    0.27
   6   1   3    2.01    0.35
  -7  -1  -3    9.96    0.71
  -7  -1  -3    8.70    0.74
   7   1   3    9.39    0.51
   7   1   3    9.34    0.69
   7   1   3    8.87    0.67
  -8  -1  -3   12.51    0.83
  -8  -1  -3   11.19    0.88
   8   1   3    9.74    0.79
   8   1   3   10.49    0.78
  -9  -1  -3    0.06    0.26
   9   1   3   -0.27    0.20
   9   1   3   -0.23    0.19
 -10  -1  -3    1.61    0.45
  10   1   3    0.46    0.32
  10   1   3    1.06    0.38
 -11  -1  -3   -0.27    0.27
  11   1   3    0.25    0.34
  11   1   3   -0.10    0.23
   9  -2  -3    0.00    0.22
   9  -2  -3    0.13    0.29
  -9   2   3    0.44    0.35
   8  -2  -3    1.32    0.34
   8  -2  -3    1.47    0.38
  -8   2   3    1.66    0.44
  -8   2   3    1.05    0.33
   7  -2  -3    0.13    0.25
   7  -2  -3   -0.09    0.18
  -7   2   3    0.09    0.24
  -7   2   3   -0.22    0.20
   6  -2  -3    8.12    0.61
   6  -2  -3    8.01    0.71
  -6   2   3    8.59    0.64
  -6   2   3    7.87    0.77
   5  -2  -3    9.04    0.62
   5  -2  -3   10.51    0.66
   5  -2  -3    9.52    0.64
  -5   2   3    9.90    0.64
  -5   2   3    7.60    0.65
   4  -2  -3    4.94    0.41
   4  -2  -3    5.94    0.44
   4  -2  -3    5.22    0.42
  -4   2   3    6.05    0.28
  -4   2   3    5.26    0.53
  -4   2   3    5.10    0.42
   3  -2  -3    1.31    0.09
   3  -2  -3    1.02    0.13
   3  -2  -3    1.62    0.23
   3  -2  -3    1.53    0.23
   3  -2  -3    0.85    0.18
  -3   2   3    1.73    0.27
  -3   2   3    1.48    0.22
  -3   2   3    1.36    0.22
  -3   2   3    1.86    0.25
  -3   2   3    1.35    0.15
   2  -2  -3    0.81    0.17
   2  -2  -3    1.01    0.17
   2  -2  -3    0.59    0.14
   2  -2  -3    0.78    0.15
   2  -2  -3    0.79    0.10
   2  -2  -3    0.86    0.13
  -2   2   3    0.89    0.16
  -2   2   3    0.91    0.16
  -2   2   3    0.82    0.13
  -2   2   3    0.77    0.16
  -2   2   3    1.02    0.19
  -2   2   3    0.96    0.16
   1  -2  -3   -0.04    0.06
   1  -2  -3   -0.03    0.07
   1  -2  -3   -0.01    0.06
   1  -2  -3    0.03    0.07
   1  -2  -3   -0.04    0.06
  -1   2   3    0.05    0.08
  -1   2   3   -0.03    0.06
  -1   2   3    0.02    0.08
  -1   2   3    0.15    0.08
  -1   2   3   -0.08    0.06
  -1   2   3   -0.02    0.05
   0  -2  -3   -0.01    0.06
   0  -2  -3    0.00    0.05
   0  -2  -3    0.11    0.07
   0  -2  -3    0.01    0.06
   0  -2  -3    0.11    0.08
   0   2   3    0.00    0.06
   0   2   3    0.06    0.07
   0   2   3   -0.02    0.07
   0   2   3    0.07    0.07
  -1  -2  -3   44.67    1.68
  -1  -2  -3   43.55    1.73
  -1  -2  -3   45.57    1.73
  -1  -2  -3   42.70    1.54
  -1  -2  -3   43.06    1.68
   1   2   3   43.58    1.68
   1   2   3   43.11    1.68
   1   2   3   42.01    1.54
   1   2   3   44.61    1.73
   1   2   3   39.69    1.71
  -2  -2  -3  526.34   18.96
  -2  -2  -3  520.68   19.58
  -2  -2  -3  547.27   19.57
  -2  -2  -3  536.82   19.10
  -2  -2  -3  535.25   18.49
   2   2   3  548.80   19.58
   2   2   3  512.58   18.39
   2   2   3  541.56   19.58
   2   2   3  564.24   18.97
   2   2   3  507.42   19.21
  -3  -2  -3    2.85    0.30
  -3  -2  -3    3.15    0.23
  -3  -2  -3    3.27    0.26
  -3  -2  -3    2.95    0.31
  -3  -2  -3    3.05    0.30
   3   2   3    2.83    0.30
   3   2   3    3.03    0.32
   3   2   3    3.47    0.30
   3   2   3    2.75    0.28
  -4  -2  -3  159.34    6.18
  -4  -2  -3  153.44    5.90
  -4  -2  -3  167.02    5.73
   4   2   3  172.29    6.19
   4   2   3  156.41    5.99
   4   2   3  161.02    6.17
   4   2   3  167.16    5.92
  -5  -2  -3    0.52    0.19
   5   2   3    0.84    0.21
   5   2   3    0.92    0.18
   5   2   3    0.98    0.23
   5   2   3    0.55    0.20
  -6  -2  -3    0.17    0.19
  -6  -2  -3    0.35    0.21
   6   2   3    0.54    0.15
   6   2   3    0.26    0.18
   6   2   3    0.35    0.20
  -7  -2  -3    0.41    0.25
  -7  -2  -3    0.04    0.19
   7   2   3    0.41    0.23
   7   2   3    0.58    0.16
   7   2   3    0.38    0.24
  -8  -2  -3    0.86    0.31
  -8  -2  -3    1.15    0.34
   8   2   3    1.82    0.41
   8   2   3    0.87    0.31
  -9  -2  -3   -0.08    0.24
  -9  -2  -3    0.18    0.18
  -9  -2  -3    0.51    0.30
   9   2   3    0.14    0.23
   9   2   3    0.03    0.25
 -10  -2  -3    0.49    0.31
 -10  -2  -3   -0.25    0.30
  10   2   3   -0.08    0.27
  10   2   3   -0.06    0.25
 -11  -2  -3    0.75    0.39
  11   2   3    1.74    0.49
  11   2   3    1.66    0.51
   9  -3  -3   -0.19    0.25
   9  -3  -3    0.09    0.27
  -9   3   3   -0.05    0.23
  -9   3   3    0.16    0.36
   8  -3  -3    2.25    0.49
   8  -3  -3    1.78    0.39
  -8   3   3    2.32    0.53
   7  -3  -3   22.02    1.21
   7  -3  -3   22.97    1.28
  -7   3   3   23.52    1.41
  -7   3   3   22.03    1.20
   6  -3  -3    6.81    0.65
   6  -3  -3    6.00    0.63
   6  -3  -3    5.44    0.53
  -6   3   3    4.51    0.51
  -6   3   3    6.43    0.71
   5  -3  -3    1.80    0.33
   5  -3  -3    1.82    0.31
   5  -3  -3    1.57    0.28
  -5   3   3    1.91    0.12
  -5   3   3    2.72    0.42
  -5   3   3    1.52    0.31
  -5   3   3    2.20    0.32
   4  -3  -3    0.52    0.17
   4  -3  -3    0.41    0.16
   4  -3  -3    0.53    0.21
  -4   3   3    0.67    0.23
  -4   3   3    0.56    0.10
  -4   3   3    0.52    0.17
  -4   3   3    0.50    0.21
   3  -3  -3    0.33    0.08
   3  -3  -3    0.35    0.13
   3  -3  -3    0.50    0.16
   3  -3  -3    0.16    0.12
  -3   3   3    0.30    0.15
  -3   3   3    0.43    0.14
  -3   3   3    0.30    0.09
  -3   3   3    0.04    0.14
   2  -3  -3   11.03    0.59
   2  -3  -3   10.87    0.58
   2  -3  -3   12.57    0.64
   2  -3  -3   11.94    0.61
   2  -3  -3   12.00    0.53
  -2   3   3   11.07    0.58
  -2   3   3   11.50    0.62
  -2   3   3   12.02    0.60
  -2   3   3   11.38    0.55
  -2   3   3   11.28    0.60
  -2   3   3   10.98    0.62
   1  -3  -3   20.89    0.90
   1  -3  -3   18.81    0.88
   1  -3  -3   20.57    0.91
   1  -3  -3   20.12    0.87
   1  -3  -3   21.26    0.91
   1  -3  -3   19.82    0.85
  -1   3   3   20.94    0.89
  -1   3   3   19.45    0.89
  -1   3   3   18.92    0.89
  -1   3   3   20.85    0.88
  -1   3   3   20.17    0.88
  -1   3   3   19.96    0.88
   0  -3  -3   24.68    1.03
   0  -3  -3   24.68    1.04
   0  -3  -3   24.10    1.04
   0  -3  -3   23.57    1.01
   0  -3  -3   25.49    1.04
   0   3   3   23.67    1.01
   0   3   3   23.68    1.03
   0   3   3   25.61    1.04
   0   3   3   23.05    1.03
   0   3   3   25.62    1.04
  -1  -3  -3   41.60    1.68
  -1  -3  -3   43.77    1.49
  -1  -3  -3   43.07    1.71
  -1  -3  -3   40.96    1.71
  -1  -3  -3   43.20    1.68
  -1  -3  -3   42.01    1.65
   1   3   3   41.28    1.49
   1   3   3   43.42    1.72
   1   3   3   44.09    1.69
   1   3   3   40.82    1.67
   1   3   3   42.40    1.71
  -2  -3  -3   25.49    1.06
  -2  -3  -3   24.13    0.91
  -2  -3  -3   26.17    1.10
  -2  -3  -3   23.45    1.06
  -2  -3  -3   23.20    1.09
   2   3   3   25.42    1.07
   2   3   3   27.09    1.11
   2   3   3   23.18    1.05
   2   3   3   24.24    1.09
  -3  -3  -3   19.65    0.90
  -3  -3  -3   16.50    0.89
  -3  -3  -3   18.15    0.85
  -3  -3  -3   18.00    0.75
   3   3   3   18.48    0.91
   3   3   3   17.37    0.85
   3   3   3   18.03    0.89
   3   3   3   18.85    0.85
  -4  -3  -3   12.13    0.69
  -4  -3  -3   12.02    0.74
  -4  -3  -3   13.50    0.64
   4   3   3   14.04    0.69
   4   3   3   15.20    0.79
   4   3   3   13.40    0.75
  -5  -3  -3    0.90    0.24
  -5  -3  -3    0.47    0.20
   5   3   3    0.07    0.11
   5   3   3    0.33    0.18
   5   3   3    0.72    0.21
  -6  -3  -3   -0.22    0.15
  -6  -3  -3   -0.11    0.14
   6   3   3   -0.02    0.16
   6   3   3   -0.03    0.16
   6   3   3    0.01    0.12
  -7  -3  -3   12.89    0.88
  -7  -3  -3   13.05    0.91
  -7  -3  -3   14.90    0.82
   7   3   3   13.81    0.90
   7   3   3   12.42    0.88
  -8  -3  -3    3.35    0.53
  -8  -3  -3    3.34    0.43
  -8  -3  -3    3.14    0.50
   8   3   3    2.69    0.46
   8   3   3    3.64    0.53
  -9  -3  -3    2.32    0.37
  -9  -3  -3    1.12    0.39
  -9  -3  -3    1.35    0.41
   9   3   3    2.31    0.47
   9   3   3    2.11    0.45
 -10  -3  -3    0.08    0.29
 -10  -3  -3   -0.06    0.29
  10   3   3    0.21    0.32
  10   3   3   -0.02    0.26
   9  -4  -3   -0.37    0.26
   9  -4  -3   -0.12    0.22
  -9   4   3   -0.15    0.37
  -9   4   3    0.16    0.31
   8  -4  -3    8.41    0.66
   8  -4  -3    8.44    0.87
  -8   4   3    6.46    0.84
  -8   4   3    6.28    0.78
   7  -4  -3    3.68    0.47
   7  -4  -3    3.62    0.56
  -7   4   3    2.20    0.45
  -7   4   3    3.52    0.45
  -7   4   3    3.27    0.58
   6  -4  -3    9.21    0.71
   6  -4  -3    8.94    0.63
   6  -4  -3    8.43    0.64
  -6   4   3    9.26    0.63
  -6   4   3    8.40    0.82
  -6   4   3    9.42    0.75
   5  -4  -3    4.00    0.44
   5  -4  -3    3.16    0.38
   5  -4  -3    3.79    0.47
  -5   4   3    3.80    0.51
  -5   4   3    3.39    0.38
  -5   4   3    3.87    0.24
  -5   4   3    3.61    0.46
   4  -4  -3    9.96    0.63
   4  -4  -3    9.44    0.44
   4  -4  -3    8.66    0.56
   4  -4  -3    8.69    0.54
  -4   4   3    9.67    0.47
  -4   4   3    9.30    0.64
  -4   4   3    8.75    0.64
  -4   4   3    9.08    0.55
   3  -4  -3   10.86    0.63
   3  -4  -3   10.05    0.50
   3  -4  -3   11.11    0.59
   3  -4  -3   10.40    0.57
  -3   4   3   11.44    0.54
  -3   4   3   10.11    0.56
  -3   4   3    9.31    0.63
  -3   4   3    9.94    0.64
   2  -4  -3    3.18    0.33
   2  -4  -3    2.87    0.26
   2  -4  -3    2.56    0.27
   2  -4  -3    2.42    0.25
  -2   4   3    2.59    0.26
  -2   4   3    1.99    0.28
  -2   4   3    2.98    0.28
  -2   4   3    3.04    0.28
  -2   4   3    2.68    0.30
   1  -4  -3    0.91    0.16
   1  -4  -3    1.08    0.17
   1  -4  -3    0.74    0.15
   1  -4  -3    0.57    0.13
   1  -4  -3    1.63    0.23
  -1   4   3    0.78    0.16
  -1   4   3    1.05    0.19
  -1   4   3    0.93    0.16
  -1   4   3    0.78    0.16
  -1   4   3    0.66    0.15
  -1   4   3    0.73    0.14
   0  -4  -3  172.20    6.62
   0  -4  -3  182.35    6.50
   0  -4  -3  176.65    6.47
   0  -4  -3  188.19    6.63
   0  -4  -3  180.92    6.63
   0   4   3  177.25    6.62
   0   4   3  171.10    6.61
   0   4   3  164.51    6.48
   0   4   3  175.20    6.46
   0   4   3  184.66    6.63
  -1  -4  -3    4.22    0.23
  -1  -4  -3    4.35    0.32
  -1  -4  -3    4.14    0.32
  -1  -4  -3    4.06    0.31
  -1  -4  -3    3.80    0.31
   1   4   3    4.58    0.32
   1   4   3    4.49    0.33
   1   4   3    3.71    0.34
   1   4   3    4.47    0.32
  -2  -4  -3   34.00    1.56
  -2  -4  -3   38.23    1.57
  -2  -4  -3   36.98    1.51
  -2  -4  -3   37.10    1.31
  -2  -4  -3   36.77    1.54
   2   4   3   38.12    1.54
   2   4   3   38.08    1.58
   2   4   3   36.68    1.51
   2   4   3   35.60    1.56
  -3  -4  -3  111.68    3.73
  -3  -4  -3  103.55    4.01
  -3  -4  -3  100.58    4.14
  -3  -4  -3  111.21    4.14
  -3  -4  -3  104.74    4.03
   3   4   3  100.79    4.00
   3   4   3  112.38    4.02
   3   4   3  104.43    4.13
  -4  -4  -3    0.00    0.09
  -4  -4  -3   -0.09    0.10
  -4  -4  -3   -0.20    0.13
  -4  -4  -3    0.07    0.13
   4   4   3   -0.14    0.12
  -5  -4  -3   12.48    0.71
  -5  -4  -3   11.97    0.77
  -5  -4  -3   11.37    0.69
   5   4   3   10.74    0.70
   5   4   3   10.81    0.73
  -6  -4  -3    2.95    0.39
  -6  -4  -3    3.94    0.45
  -6  -4  -3    2.20    0.41
   6   4   3    2.16    0.39
   6   4   3    3.75    0.47
  -7  -4  -3    7.83    0.79
  -7  -4  -3    7.34    0.72
  -7  -4  -3    7.19    0.56
   7   4   3    7.44    0.75
   7   4   3    6.89    0.70
  -8  -4  -3    1.99    0.44
  -8  -4  -3    1.44    0.36
  -8  -4  -3    1.52    0.33
   8   4   3    1.55    0.40
   8   4   3    2.24    0.44
  -9  -4  -3    0.55    0.32
  -9  -4  -3    1.33    0.39
  -9  -4  -3    0.83    0.29
   9   4   3    1.83    0.47
   9   4   3    1.27    0.41
 -10  -4  -3    0.77    0.37
  10   4   3    1.66    0.49
  10   4   3    2.34    0.54
   9  -5  -3    4.83    0.72
   9  -5  -3    4.30    0.56
  -9   5   3    3.36    0.67
  -9   5   3    2.88    0.60
   8  -5  -3    0.73    0.40
   8  -5  -3    0.41    0.25
  -8   5   3    0.02    0.33
  -8   5   3    0.39    0.34
   7  -5  -3    2.40    0.38
   7  -5  -3    4.32    0.60
  -7   5   3    3.77    0.63
  -7   5   3    3.68    0.60
   6  -5  -3    0.76    0.31
   6  -5  -3    1.49    0.29
  -6   5   3    1.17    0.27
  -6   5   3    1.68    0.40
  -6   5   3    1.42    0.40
   5  -5  -3   36.40    1.68
   5  -5  -3   34.09    1.56
   5  -5  -3   37.39    1.62
  -5   5   3   33.90    1.71
  -5   5   3   35.11    1.56
  -5   5   3   34.14    1.75
  -5   5   3   38.01    1.43
   4  -5  -3   14.82    0.84
   4  -5  -3   15.29    0.77
   4  -5  -3   13.94    0.73
   4  -5  -3   13.76    0.66
  -4   5   3   13.71    0.73
  -4   5   3   14.16    0.86
  -4   5   3   14.14    0.69
  -4   5   3   14.37    0.87
   3  -5  -3    4.76    0.36
   3  -5  -3    5.04    0.37
   3  -5  -3    5.36    0.35
  -3   5   3    4.97    0.35
  -3   5   3    4.99    0.36
  -3   5   3    5.62    0.52
  -3   5   3    4.55    0.45
   2  -5  -3   62.53    2.49
   2  -5  -3   55.13    2.38
   2  -5  -3   57.92    2.35
   2  -5  -3   59.62    2.40
  -2   5   3   59.28    2.44
  -2   5   3   65.23    2.39
  -2   5   3   64.42    2.40
  -2   5   3   62.07    2.38
  -2   5   3   60.38    2.46
   1  -5  -3  114.94    4.26
   1  -5  -3  109.53    4.32
   1  -5  -3  114.74    4.32
   1  -5  -3  119.38    4.37
  -1   5   3  118.16    4.35
  -1   5   3  117.11    4.27
  -1   5   3  106.34    4.30
  -1   5   3  110.38    4.29
   0  -5  -3    9.73    0.54
   0  -5  -3    9.60    0.45
   0  -5  -3    9.38    0.52
   0  -5  -3    8.15    0.52
   0  -5  -3    9.43    0.51
   0   5   3    9.09    0.37
   0   5   3    8.69    0.50
   0   5   3    8.97    0.53
   0   5   3    9.11    0.51
   0   5   3    9.48    0.56
   0   5   3    9.03    0.44
  -1  -5  -3   10.18    0.58
  -1  -5  -3   10.35    0.60
  -1  -5  -3   10.59    0.44
  -1  -5  -3   10.31    0.57
  -1  -5  -3   10.36    0.56
   1   5   3   10.42    0.57
   1   5   3    9.12    0.56
  -2  -5  -3    3.93    0.39
  -2  -5  -3    2.94    0.33
  -2  -5  -3    2.12    0.30
  -2  -5  -3    3.25    0.13
  -2  -5  -3    3.37    0.34
   2   5   3    3.71    0.36
   2   5   3    3.28    0.33
  -3  -5  -3    1.98    0.17
  -3  -5  -3    1.97    0.30
  -3  -5  -3    1.84    0.20
  -3  -5  -3    1.72    0.28
  -3  -5  -3    1.96    0.29
   3   5   3    1.74    0.26
   3   5   3    1.52    0.27
  -4  -5  -3    0.71    0.21
  -4  -5  -3    0.56    0.15
  -4  -5  -3    0.67    0.14
  -4  -5  -3    0.50    0.20
   4   5   3    0.66    0.21
   4   5   3    0.51    0.20
  -5  -5  -3   17.39    0.81
  -5  -5  -3   15.99    0.86
  -5  -5  -3   15.81    0.90
  -5  -5  -3   17.25    1.00
   5   5   3   15.97    0.95
  -6  -5  -3    1.07    0.26
  -6  -5  -3    0.83    0.31
  -6  -5  -3    0.75    0.25
   6   5   3    1.37    0.34
   6   5   3    1.08    0.33
  -7  -5  -3    1.41    0.35
  -7  -5  -3    1.79    0.35
  -7  -5  -3    1.44    0.33
   7   5   3    1.52    0.39
   7   5   3    1.44    0.39
  -8  -5  -3    1.74    0.35
  -8  -5  -3    0.70    0.29
  -8  -5  -3    1.83    0.45
   8   5   3    1.39    0.41
   8   5   3    1.57    0.40
  -9  -5  -3    0.32    0.24
  -9  -5  -3    0.39    0.29
  -9  -5  -3   -0.01    0.25
   9   5   3    0.06    0.27
   9   5   3   -0.10    0.25
 -10  -5  -3    1.54    0.46
 -10  -5  -3    0.79    0.41
  10   5   3    1.31    0.46
  10   5   3    1.26    0.43
   9  -6  -3    1.68    0.52
   9  -6  -3    1.50    0.38
  -9   6   3    1.65    0.52
  -9   6   3    1.38    0.48
   8  -6  -3    3.73    0.49
   8  -6  -3    3.22    0.60
  -8   6   3    3.62    0.64
  -8   6   3    3.06    0.61
   7  -6  -3   -0.07    0.27
   7  -6  -3    0.43    0.21
  -7   6   3    0.45    0.37
  -7   6   3    0.42    0.34
   6  -6  -3    1.57    0.39
   6  -6  -3    2.37    0.34
  -6   6   3    1.60    0.42
  -6   6   3    2.70    0.50
   5  -6  -3   -0.13    0.11
   5  -6  -3    0.28    0.23
   5  -6  -3    0.11    0.14
   5  -6  -3    0.06    0.13
  -5   6   3    0.16    0.24
  -5   6   3   -0.04    0.11
  -5   6   3    0.21    0.25
  -5   6   3    0.04    0.13
   4  -6  -3   16.37    0.80
   4  -6  -3   13.71    0.75
   4  -6  -3   14.57    0.74
  -4   6   3   14.76    0.90
  -4   6   3   14.90    0.76
  -4   6   3   14.42    0.91
  -4   6   3   16.07    0.78
  -4   6   3   15.20    0.75
   3  -6  -3    0.42    0.14
   3  -6  -3    0.19    0.11
   3  -6  -3    0.26    0.14
  -3   6   3    0.31    0.19
  -3   6   3    0.25    0.17
  -3   6   3    0.42    0.16
  -3   6   3    0.25    0.12
   2  -6  -3    9.29    0.56
   2  -6  -3    8.27    0.50
   2  -6  -3    9.71    0.52
   2  -6  -3    9.81    0.58
  -2   6   3    9.07    0.50
  -2   6   3    9.11    0.49
  -2   6   3    9.31    0.60
  -2   6   3    9.13    0.55
   1  -6  -3    1.47    0.21
   1  -6  -3    1.30    0.20
   1  -6  -3    1.91    0.28
   1  -6  -3    1.36    0.21
  -1   6   3    2.01    0.29
  -1   6   3    1.31    0.16
  -1   6   3    1.30    0.19
  -1   6   3    1.47    0.21
   0  -6  -3   16.68    0.81
   0  -6  -3   15.34    0.84
   0  -6  -3   16.76    0.71
   0  -6  -3   15.26    0.80
   0   6   3   15.97    0.80
   0   6   3   17.40    0.70
   0   6   3   16.56    0.84
   0   6   3   16.49    0.61
  -1  -6  -3   12.07    0.64
  -1  -6  -3   11.23    0.64
  -1  -6  -3   10.70    0.66
   1   6   3   10.39    0.61
   1   6   3   10.70    0.62
  -2  -6  -3   12.40    0.49
  -2  -6  -3   11.95    0.72
  -2  -6  -3   12.92    0.72
  -2  -6  -3   12.84    0.74
   2   6   3   11.67    0.67
   2   6   3   14.06    0.73
  -3  -6  -3    3.42    0.42
  -3  -6  -3    3.45    0.23
  -3  -6  -3    3.42    0.20
  -3  -6  -3    3.22    0.41
   3   6   3    3.59    0.41
   3   6   3    3.33    0.37
  -4  -6  -3    0.64    0.13
  -4  -6  -3    0.24    0.20
  -4  -6  -3    0.62    0.21
  -4  -6  -3    0.73    0.15
   4   6   3    0.48    0.22
   4   6   3    0.66    0.21
  -5  -6  -3    3.35    0.44
  -5  -6  -3    4.03    0.36
  -5  -6  -3    2.75    0.45
  -5  -6  -3    3.20    0.35
   5   6   3    3.81    0.50
  -6  -6  -3    3.09    0.38
  -6  -6  -3    2.97    0.43
  -6  -6  -3    2.66    0.48
   6   6   3    1.82    0.40
   6   6   3    1.87    0.39
  -7  -6  -3    3.58    0.50
  -7  -6  -3    4.25    0.63
  -7  -6  -3    4.41    0.51
   7   6   3    3.70    0.56
   7   6   3    3.49    0.54
  -8  -6  -3    1.49    0.37
  -8  -6  -3    1.19    0.42
  -8  -6  -3    1.82    0.39
   8   6   3    1.91    0.47
   8   6   3    1.46    0.40
  -9  -6  -3    0.11    0.30
  -9  -6  -3    0.25    0.24
  -9  -6  -3   -0.09    0.25
   9   6   3    0.08    0.30
   9   6   3    0.36    0.32
 -10  -6  -3    8.03    1.00
 -10  -6  -3    6.96    0.87
  10   6   3    8.13    0.96
  10   6   3    8.12    0.96
   8  -7  -3    2.18    0.37
   8  -7  -3    2.20    0.53
  -8   7   3    2.05    0.52
  -8   7   3    1.16    0.48
   7  -7  -3    2.48    0.36
   7  -7  -3    3.06    0.56
  -7   7   3    1.84    0.47
  -7   7   3    1.75    0.46
   6  -7  -3    1.77    0.43
   6  -7  -3    2.79    0.36
  -6   7   3    2.51    0.48
  -6   7   3    1.73    0.42
   5  -7  -3    2.95    0.33
   5  -7  -3    2.80    0.34
  -5   7   3    2.71    0.48
  -5   7   3    2.60    0.45
   4  -7  -3    0.07    0.13
   4  -7  -3    0.17    0.14
   4  -7  -3    0.25    0.12
  -4   7   3    0.34    0.14
  -4   7   3    0.48    0.24
  -4   7   3   -0.17    0.17
   3  -7  -3    0.89    0.19
   3  -7  -3    1.18    0.20
   3  -7  -3    1.31    0.26
  -3   7   3    1.51    0.21
  -3   7   3    1.35    0.28
  -3   7   3    1.17    0.27
   2  -7  -3    5.86    0.45
   2  -7  -3    5.49    0.37
   2  -7  -3    4.59    0.37
  -2   7   3    5.61    0.37
  -2   7   3    4.60    0.49
  -2   7   3    5.16    0.35
  -2   7   3    4.84    0.40
   1  -7  -3   26.42    1.23
   1  -7  -3   29.29    1.24
   1  -7  -3   27.66    1.31
  -1   7   3   27.31    1.22
  -1   7   3   28.22    1.30
  -1   7   3   28.86    1.19
  -1   7   3   27.25    1.07
   0  -7  -3    0.85    0.22
   0  -7  -3    0.59    0.18
   0  -7  -3    0.91    0.20
   0   7   3    0.86    0.08
   0   7   3    0.86    0.11
   0   7   3    0.75    0.18
   0   7   3    0.39    0.16
  -1  -7  -3    7.63    0.53
  -1  -7  -3    8.49    0.53
  -1  -7  -3    7.84    0.57
   1   7   3    6.67    0.49
   1   7   3    8.17    0.53
  -2  -7  -3   21.77    1.18
  -2  -7  -3   26.50    1.20
  -2  -7  -3   23.53    1.19
   2   7   3   23.67    1.18
   2   7   3   25.19    1.15
  -3  -7  -3    0.11    0.05
  -3  -7  -3   -0.03    0.15
  -3  -7  -3    0.01    0.04
  -3  -7  -3   -0.03    0.03
  -3  -7  -3   -0.03    0.15
   3   7   3   -0.15    0.13
   3   7   3   -0.10    0.13
  -4  -7  -3   12.02    0.58
  -4  -7  -3   12.32    0.54
  -4  -7  -3   11.06    0.76
  -4  -7  -3   12.22    0.82
   4   7   3   10.52    0.70
   4   7   3   11.42    0.78
  -5  -7  -3    0.38    0.22
  -5  -7  -3    0.01    0.20
  -5  -7  -3    0.24    0.13
   5   7   3   -0.20    0.17
  -6  -7  -3    0.28    0.19
  -6  -7  -3    0.73    0.29
  -6  -7  -3    0.59    0.32
   6   7   3    0.67    0.27
  -7  -7  -3    8.11    0.88
  -7  -7  -3    5.98    0.60
  -7  -7  -3    6.91    0.71
   7   7   3    6.60    0.77
   7   7   3    5.67    0.68
  -8  -7  -3    1.16    0.42
  -8  -7  -3    1.54    0.37
  -8  -7  -3    1.46    0.37
   8   7   3    1.07    0.40
   8   7   3    0.56    0.29
  -9  -7  -3    0.88    0.43
  -9  -7  -3    1.73    0.43
  -9  -7  -3    1.43    0.41
   9   7   3    1.32    0.50
   9   7   3    1.96    0.52
   8  -8  -3   -0.17    0.16
  -8   8   3    0.02    0.33
  -8   8   3    0.13    0.36
   7  -8  -3    0.14    0.17
  -7   8   3   -0.15    0.26
  -7   8   3   -0.05    0.25
   6  -8  -3    0.44    0.18
  -6   8   3    0.59    0.32
  -6   8   3    0.21    0.30
   5  -8  -3    1.09    0.26
   5  -8  -3    0.96    0.21
  -5   8   3    0.74    0.31
  -5   8   3    0.89    0.31
   4  -8  -3    0.72    0.18
   4  -8  -3    0.32    0.18
  -4   8   3    0.72    0.28
  -4   8   3    0.72    0.26
   3  -8  -3    3.49    0.34
   3  -8  -3    4.20    0.46
  -3   8   3    3.65    0.48
  -3   8   3    3.54    0.42
  -3   8   3    4.04    0.31
   2  -8  -3   -0.02    0.12
   2  -8  -3   -0.02    0.15
   2  -8  -3   -0.12    0.09
  -2   8   3    0.01    0.11
  -2   8   3    0.00    0.13
  -2   8   3    0.03    0.10
  -2   8   3   -0.15    0.18
   1  -8  -3   24.05    1.08
   1  -8  -3   23.22    1.19
   1  -8  -3   21.90    1.07
  -1   8   3   22.71    1.00
  -1   8   3   23.10    1.06
  -1   8   3   22.61    0.91
  -1   8   3   24.61    1.18
   0  -8  -3    1.19    0.28
   0  -8  -3    0.50    0.19
   0  -8  -3    0.90    0.21
   0   8   3    0.71    0.22
   0   8   3    0.54    0.18
   0   8   3    0.70    0.08
  -1  -8  -3    5.59    0.42
  -1  -8  -3    3.46    0.41
  -1  -8  -3    4.61    0.52
   1   8   3    3.96    0.42
   1   8   3    4.82    0.47
  -2  -8  -3    5.48    0.52
  -2  -8  -3    3.46    0.47
  -2  -8  -3    4.01    0.47
   2   8   3    5.09    0.48
   2   8   3    4.00    0.45
  -3  -8  -3   -0.04    0.18
  -3  -8  -3    0.50    0.25
   3   8   3    0.57    0.24
   3   8   3    0.55    0.21
  -4  -8  -3   -0.02    0.19
  -4  -8  -3   -0.17    0.19
  -4  -8  -3    0.03    0.08
  -4  -8  -3   -0.04    0.05
   4   8   3    0.01    0.18
   4   8   3   -0.27    0.14
  -5  -8  -3    4.16    0.55
  -5  -8  -3    4.04    0.32
  -5  -8  -3    3.37    0.55
   5   8   3    5.30    0.62
  -6  -8  -3    2.21    0.31
  -6  -8  -3    2.14    0.44
  -6  -8  -3    2.93    0.55
   6   8   3    2.65    0.50
  -7  -8  -3    0.40    0.28
  -7  -8  -3    1.18    0.41
  -7  -8  -3    0.40    0.21
   7   8   3    0.91    0.36
   7   8   3    0.03    0.29
  -8  -8  -3    0.96    0.35
  -8  -8  -3    1.29    0.34
  -8  -8  -3    1.35    0.47
   8   8   3    1.91    0.49
   8   8   3    0.67    0.39
  -9  -8  -3    0.06    0.28
  -9  -8  -3   -0.05    0.27
  -9  -8  -3   -0.37    0.27
   9   8   3   -0.26    0.27
   9   8   3   -0.50    0.30
   7  -9  -3    1.06    0.22
  -7   9   3    0.82    0.44
  -7   9   3    1.16    0.42
   6  -9  -3   -0.09    0.12
  -6   9   3   -0.37    0.25
  -6   9   3   -0.23    0.24
   5  -9  -3    0.00    0.15
   5  -9  -3   -0.11    0.11
  -5   9   3   -0.21    0.22
  -5   9   3   -0.18    0.21
   4  -9  -3    5.52    0.57
   4  -9  -3    5.74    0.41
  -4   9   3    5.07    0.62
  -4   9   3    5.32    0.59
   3  -9  -3    0.48    0.18
   3  -9  -3    0.76    0.25
  -3   9   3    1.09    0.33
  -3   9   3    0.31    0.22
   2  -9  -3    2.09    0.29
   2  -9  -3    3.52    0.37
   2  -9  -3    3.90    0.49
  -2   9   3    3.58    0.34
  -2   9   3    3.64    0.48
  -2   9   3    3.05    0.34
  -2   9   3    3.75    0.33
   1  -9  -3   14.35    0.90
   1  -9  -3   14.85    0.78
   1  -9  -3   13.96    0.79
  -1   9   3   14.34    0.63
  -1   9   3   14.52    0.68
  -1   9   3   14.86    0.89
  -1   9   3   14.24    0.76
   0  -9  -3   11.20    0.77
   0  -9  -3   10.19    0.64
   0  -9  -3   10.39    0.67
   0   9   3   10.40    0.65
   0   9   3   10.24    0.70
  -1  -9  -3   24.90    1.20
  -1  -9  -3   23.50    1.22
  -1  -9  -3   22.89    1.28
   1   9   3   25.08    1.21
   1   9   3   24.43    1.20
  -2  -9  -3    0.34    0.25
  -2  -9  -3    0.03    0.20
  -2  -9  -3   -0.22    0.17
   2   9   3    0.23    0.20
   2   9   3    0.10    0.20
  -3  -9  -3    1.02    0.32
  -3  -9  -3    0.84    0.29
   3   9   3    0.77    0.27
   3   9   3    1.13    0.27
  -4  -9  -3    5.66    0.68
  -4  -9  -3    7.30    0.76
  -4  -9  -3    6.92    0.32
   4   9   3    6.74    0.62
   4   9   3    6.89    0.70
  -5  -9  -3    0.15    0.27
  -5  -9  -3    0.58    0.33
   5   9   3    0.71    0.31
  -6  -9  -3   14.38    1.05
  -6  -9  -3   16.23    1.18
   6   9   3   19.36    1.19
  -7  -9  -3   -0.01    0.35
  -7  -9  -3    0.20    0.23
   7   9   3    0.04    0.32
   7   9   3    0.12    0.29
  -8  -9  -3    3.10    0.66
  -8  -9  -3    2.30    0.50
   8   9   3    2.42    0.55
   8   9   3    2.32    0.54
  -6  10   3    0.56    0.36
  -6  10   3    0.47    0.34
   5 -10  -3    0.21    0.22
   5 -10  -3    0.74    0.16
  -5  10   3    0.44    0.29
  -5  10   3    1.02    0.39
   4 -10  -3    0.35    0.22
   4 -10  -3    0.25    0.15
  -4  10   3    0.95    0.34
  -4  10   3    0.65    0.27
   3 -10  -3   11.40    0.66
   3 -10  -3   11.85    0.82
  -3  10   3   13.01    0.90
  -3  10   3   12.74    0.77
   2 -10  -3    0.51    0.19
   2 -10  -3    0.50    0.26
  -2  10   3    1.02    0.21
  -2  10   3    0.63    0.30
   1 -10  -3    2.33    0.42
   1 -10  -3    1.87    0.30
  -1  10   3    1.68    0.38
  -1  10   3    2.07    0.20
   0 -10  -3    1.59    0.31
   0 -10  -3    1.57    0.38
   0  10   3    1.52    0.34
   0  10   3    0.77    0.24
  -1 -10  -3    0.06    0.18
  -1 -10  -3    0.18    0.26
   1  10   3    0.24    0.20
   1  10   3    0.30    0.22
  -2 -10  -3    1.53    0.39
  -2 -10  -3    0.45    0.25
   2  10   3    1.88    0.35
   2  10   3    0.75    0.27
  -3 -10  -3   33.57    1.66
  -3 -10  -3   27.86    1.59
   3  10   3   30.60    1.47
   3  10   3   31.06    1.56
  -4 -10  -3    0.81    0.34
  -4 -10  -3    0.94    0.36
   4  10   3    0.75    0.27
   4  10   3    0.71    0.31
  -5 -10  -3    0.38    0.30
  -5 -10  -3    0.79    0.36
   5  10   3    0.93    0.36
  -6 -10  -3    0.14    0.27
  -6 -10  -3    0.57    0.37
   6  10   3    0.28    0.31
  -7 -10  -3    3.61    0.68
  -7 -10  -3    3.26    0.59
   7  10   3    3.47    0.60
   7  10   3    2.35    0.55
  -8 -10  -3    0.35    0.33
  -8 -10  -3    0.97    0.51
   8  10   3    0.01    0.32
   8  10   3    0.85    0.43
   5 -11  -3    0.33    0.26
  -5  11   3   -0.28    0.28
   4 -11  -3    0.25    0.25
   4 -11  -3    0.20    0.12
  -4  11   3    0.22    0.30
   3 -11  -3    0.30    0.16
   3 -11  -3    0.07    0.22
  -3  11   3    0.17    0.26
   2 -11  -3    1.25    0.25
   2 -11  -3    0.93    0.31
  -2  11   3    0.96    0.33
   1 -11  -3    1.29    0.36
   1 -11  -3    1.05    0.26
  -1  11   3    1.46    0.36
   0 -11  -3   -0.22    0.17
   0 -11  -3   -0.08    0.19
   0  11   3    0.28    0.24
  -1 -11  -3    1.27    0.33
  -1 -11  -3    0.92    0.36
   1  11   3    2.13    0.39
  -2 -11  -3    1.04    0.33
  -2 -11  -3    1.21    0.36
   2  11   3    0.93    0.29
   2  11   3    1.79    0.34
  -3 -11  -3    0.79    0.33
  -3 -11  -3    1.11    0.34
   3  11   3    0.83    0.31
   3  11   3    1.46    0.35
  -4 -11  -3    0.03    0.28
  -4 -11  -3   -0.48    0.19
   4  11   3    0.16    0.26
   4  11   3   -0.02    0.29
  -5 -11  -3    0.12    0.28
  -5 -11  -3   -0.01    0.27
   5  11   3   -0.11    0.25
  -6 -11  -3    0.25    0.35
  -6 -11  -3    0.26    0.30
   6  11   3    0.69    0.36
  -7 -11  -3    0.81    0.41
  -7 -11  -3    1.16    0.46
   7  11   3   -0.14    0.30
   4 -12  -3    1.08    0.37
  -4  12   3    0.82    0.40
   3 -12  -3    2.95    0.53
   3 -12  -3    3.02    0.32
  -3  12   3    3.25    0.59
   2 -12  -3    1.59    0.42
   2 -12  -3    1.39    0.27
  -2  12   3    1.75    0.42
   1 -12  -3    0.24    0.25
   1 -12  -3    0.23    0.19
  -1  12   3   -0.46    0.22
   0 -12  -3    0.15    0.21
   0 -12  -3   -0.08    0.23
   0  12   3    0.08    0.23
  -1 -12  -3    0.37    0.28
  -1 -12  -3    0.14    0.22
   1  12   3    0.06    0.24
  -2 -12  -3    0.16    0.23
  -2 -12  -3   -0.08    0.26
   2  12   3    0.26    0.26
  -3 -12  -3   -0.22    0.23
  -3 -12  -3    0.12    0.29
   3  12   3    0.54    0.26
  -4 -12  -3    1.80    0.47
  -4 -12  -3    1.19    0.42
   4  12   3    1.31    0.36
  -5 -12  -3    2.96    0.63
  -5 -12  -3    3.48    0.64
  -6 -12  -3    1.35    0.48
  -6 -12  -3    1.82    0.54
   6  12   3    1.29    0.46
   3 -13  -3    0.17    0.34
  -3  13   3    0.36    0.34
   2 -13  -3    0.22    0.18
   2 -13  -3    0.13    0.27
  -2  13   3    0.35    0.36
   1 -13  -3    2.75    0.40
   1 -13  -3    2.30    0.52
  -1  13   3    3.14    0.54
   0 -13  -3    0.26    0.28
   0 -13  -3    0.11    0.23
   0  13   3    0.17    0.26
  -1 -13  -3    0.07    0.26
  -1 -13  -3    0.31    0.27
   1  13   3    0.30    0.27
  -2 -13  -3    0.22    0.28
  -2 -13  -3    0.55    0.36
   2  13   3    0.20    0.23
  -3 -13  -3    0.22    0.33
  -3 -13  -3    0.25    0.28
   3  13   3   -0.06    0.23
  -4 -13  -3    0.78    0.39
  -4 -13  -3    1.96    0.56
  -2 -12   4    0.31    0.40
   1  12  -4    0.28    0.39
  -1 -12   4    0.02    0.22
  -1 -12   4    0.34    0.39
   0  12  -4    1.89    0.54
   0 -12   4    1.25    0.30
   0 -12   4    2.19    0.59
  -1  12  -4    1.95    0.56
   1 -12   4    1.12    0.34
   1 -12   4    2.10    0.56
  -2  12  -4    0.57    0.39
   2 -12   4    0.46    0.38
   2 -12   4    0.05    0.20
   4  11  -4    0.48    0.38
  -4 -11   4    0.39    0.28
  -4 -11   4    0.17    0.35
  -4 -11   4    0.40    0.32
   3  11  -4    3.03    0.61
  -3 -11   4    1.90    0.45
  -3 -11   4    3.20    0.64
  -3 -11   4    1.91    0.39
   2  11  -4   -0.20    0.27
  -2 -11   4    0.08    0.19
  -2 -11   4   -0.23    0.30
  -2 -11   4    0.11    0.23
   1  11  -4    0.74    0.36
  -1 -11   4    0.50    0.38
  -1 -11   4    1.31    0.30
  -1 -11   4    1.20    0.35
   0  11  -4    0.13    0.29
   0 -11   4    0.07    0.21
   0 -11   4    0.23    0.33
   0 -11   4    0.00    0.18
  -1  11  -4    0.98    0.43
   1 -11   4    1.63    0.26
   1 -11   4    1.61    0.35
   1 -11   4    1.07    0.45
  -2  11  -4    0.63    0.36
   2 -11   4   -0.22    0.28
   2 -11   4    0.58    0.27
  -3  11  -4    0.76    0.42
   3 -11   4    1.20    0.43
   3 -11   4    0.80    0.31
  -4  11  -4   -0.01    0.30
   4 -11   4    0.18    0.24
   5  10  -4   -0.02    0.26
  -5 -10   4   -0.08    0.28
  -5 -10   4   -0.41    0.27
  -5 -10   4   -0.17    0.21
   4  10  -4    0.57    0.33
  -4 -10   4    0.89    0.31
  -4 -10   4    0.71    0.39
  -4 -10   4    0.17    0.31
  -3 -10   4    0.47    0.30
  -3 -10   4    0.20    0.30
  -3 -10   4    0.28    0.25
  -2 -10   4   -0.05    0.28
  -2 -10   4    0.56    0.25
  -2 -10   4    0.00    0.23
  -1 -10   4   11.25    0.72
  -1 -10   4   11.92    0.81
  -1 -10   4   10.03    1.01
   0  10  -4    0.79    0.35
   0 -10   4    1.06    0.27
   0 -10   4    2.14    0.49
   0 -10   4    1.67    0.33
  -1  10  -4    0.62    0.30
   1 -10   4    0.54    0.18
   1 -10   4    1.16    0.31
   1 -10   4    0.59    0.33
  -2  10  -4    0.56    0.32
   2 -10   4    0.41    0.11
   2 -10   4    0.29    0.21
   2 -10   4    0.55    0.35
  -3  10  -4    0.67    0.34
   3 -10   4    0.75    0.34
   3 -10   4    0.40    0.23
  -4  10  -4    0.41    0.29
  -4  10  -4   -0.33    0.26
   4 -10   4    0.18    0.25
  -5  10  -4   -0.01    0.21
  -5  10  -4   -0.33    0.21
  -5  10  -4   -0.30    0.23
  -6  10  -4    1.52    0.42
  -6  10  -4    1.70    0.48
  -6  10  -4    0.90    0.35
   6   9  -4    0.03    0.31
   6   9  -4    0.25    0.30
  -6  -9   4    0.31    0.30
  -6  -9   4    0.40    0.41
  -6  -9   4    0.45    0.35
   5   9  -4    1.56    0.44
   5   9  -4    2.65    0.53
  -5  -9   4    2.37    0.46
  -5  -9   4    2.53    0.52
  -5  -9   4    1.32    0.44
   4   9  -4    0.01    0.24
   4   9  -4   -0.29    0.19
  -4  -9   4   -0.25    0.26
  -4  -9   4    0.18    0.23
  -4  -9   4   -0.03    0.25
   3   9  -4    1.20    0.27
   3   9  -4    1.30    0.35
  -3  -9   4    0.65    0.34
  -3  -9   4    0.36    0.21
  -3  -9   4    0.33    0.29
   2   9  -4    1.63    0.34
  -2  -9   4    1.20    0.34
  -2  -9   4    2.70    0.50
  -2  -9   4    1.43    0.30
  -1  -9   4    0.92    0.25
  -1  -9   4    1.23    0.32
  -1  -9   4    1.47    0.40
   0   9  -4   24.17    1.40
   0  -9   4   24.38    1.42
   0  -9   4   24.39    1.21
   0  -9   4   24.66    1.19
  -1   9  -4    1.58    0.41
   1  -9   4    1.59    0.32
   1  -9   4    1.01    0.38
   1  -9   4    1.27    0.24
  -2   9  -4    0.54    0.30
  -2   9  -4    0.57    0.18
   2  -9   4    0.59    0.24
   2  -9   4    0.57    0.13
   2  -9   4    0.32    0.29
  -3   9  -4    3.25    0.38
  -3   9  -4    2.61    0.51
   3  -9   4    2.67    0.44
   3  -9   4    3.51    0.57
  -4   9  -4    3.08    0.53
  -4   9  -4    3.62    0.43
   4  -9   4    2.38    0.42
  -5   9  -4    0.12    0.21
  -5   9  -4    0.17    0.28
  -5   9  -4    0.18    0.25
  -6   9  -4    1.19    0.36
  -6   9  -4    0.62    0.30
  -6   9  -4    0.87    0.39
  -7   9  -4    2.43    0.47
  -7   9  -4    1.89    0.49
   7   8  -4    4.93    0.68
   7   8  -4    4.24    0.73
  -7  -8   4    3.46    0.70
  -7  -8   4    3.12    0.54
  -7  -8   4    4.21    0.62
  -7  -8   4    4.37    0.62
   6   8  -4    0.70    0.36
   6   8  -4    0.38    0.28
  -6  -8   4    0.44    0.27
  -6  -8   4   -0.19    0.20
  -6  -8   4   -0.04    0.33
  -6  -8   4   -0.04    0.25
   5   8  -4    5.69    0.71
   5   8  -4    5.25    0.51
   5   8  -4    5.33    0.67
  -5  -8   4    4.45    0.68
  -5  -8   4    4.72    0.63
  -5  -8   4    5.05    0.59
  -5  -8   4    4.37    0.53
   4   8  -4   -0.04    0.16
   4   8  -4    0.08    0.23
   4   8  -4    0.05    0.23
  -4  -8   4    0.09    0.25
  -4  -8   4    0.00    0.19
  -4  -8   4   -0.13    0.26
   3   8  -4   14.30    0.97
   3   8  -4   16.29    0.80
  -3  -8   4   15.42    1.03
  -3  -8   4   15.69    0.89
  -3  -8   4   16.04    1.05
   2   8  -4    0.35    0.21
  -2  -8   4   -0.04    0.23
  -2  -8   4    0.80    0.25
  -2  -8   4    0.69    0.29
   1   8  -4    0.13    0.17
  -1  -8   4    0.10    0.24
  -1  -8   4   -0.08    0.16
  -1  -8   4    0.13    0.18
   0   8  -4    7.16    0.46
   0   8  -4    5.63    0.44
   0   8  -4    5.98    0.68
   0  -8   4    6.99    0.56
   0  -8   4    6.18    0.56
   0  -8   4    6.61    0.73
   0  -8   4    5.70    0.48
  -1   8  -4    6.94    0.36
  -1   8  -4    6.99    0.43
  -1   8  -4    7.23    0.74
   1  -8   4    6.25    0.71
   1  -8   4    6.62    0.52
   1  -8   4    6.43    0.45
  -2   8  -4   -0.06    0.11
  -2   8  -4    0.01    0.21
   2  -8   4   -0.05    0.09
   2  -8   4   -0.09    0.15
   2  -8   4    0.02    0.09
   2  -8   4   -0.02    0.23
  -3   8  -4    1.16    0.33
  -3   8  -4    1.34    0.25
   3  -8   4    1.31    0.31
  -4   8  -4    2.83    0.47
  -4   8  -4    3.16    0.41
   4  -8   4    2.97    0.45
  -5   8  -4    0.66    0.30
  -5   8  -4    0.31    0.25
  -5   8  -4    0.47    0.24
   5  -8   4    0.33    0.26
  -6   8  -4   -0.45    0.18
  -6   8  -4    0.18    0.24
  -6   8  -4   -0.24    0.19
   6  -8   4   -0.09    0.23
  -7   8  -4    5.16    0.62
  -7   8  -4    4.82    0.72
   7  -8   4    4.84    0.67
  -8   8  -4    1.94    0.54
   8  -8   4    1.01    0.40
   7   7  -4    0.59    0.30
   7   7  -4    1.26    0.45
  -7  -7   4    1.03    0.33
  -7  -7   4    0.78    0.35
  -7  -7   4    1.50    0.50
   6   7  -4    0.36    0.26
   6   7  -4    0.04    0.18
   6   7  -4    0.39    0.31
  -6  -7   4   -0.05    0.23
  -6  -7   4    0.01    0.22
  -6  -7   4    0.12    0.30
   5   7  -4    0.09    0.22
   5   7  -4    0.09    0.17
   5   7  -4    0.27    0.26
  -5  -7   4    0.47    0.31
  -5  -7   4    0.48    0.23
  -5  -7   4    0.38    0.25
  -5  -7   4    0.99    0.32
   4   7  -4    7.67    0.75
   4   7  -4    7.13    0.50
   4   7  -4    7.03    0.73
  -4  -7   4    7.09    0.77
  -4  -7   4    6.92    0.72
  -4  -7   4    6.76    0.65
  -4  -7   4    8.79    0.62
   3   7  -4    1.03    0.21
   3   7  -4    0.89    0.29
   3   7  -4    1.21    0.31
  -3  -7   4    0.75    0.30
  -3  -7   4    1.62    0.38
  -3  -7   4    1.00    0.26
   2   7  -4    0.81    0.26
  -2  -7   4    1.71    0.37
  -2  -7   4    0.89    0.27
  -2  -7   4    0.92    0.28
  -2  -7   4    1.37    0.29
   1   7  -4    4.51    0.30
   1   7  -4    3.62    0.41
  -1  -7   4    3.95    0.46
  -1  -7   4    3.66    0.43
  -1  -7   4    3.42    0.48
  -1  -7   4    3.64    0.45
   0   7  -4    0.05    0.12
   0   7  -4    0.40    0.23
   0   7  -4    0.42    0.13
   0  -7   4    0.32    0.15
   0  -7   4    0.06    0.21
   0  -7   4    0.61    0.19
   0  -7   4   -0.01    0.13
  -1   7  -4    0.30    0.12
  -1   7  -4    0.39    0.24
  -1   7  -4    0.77    0.17
  -1   7  -4    0.35    0.10
   1  -7   4    0.39    0.18
   1  -7   4    0.08    0.10
   1  -7   4    0.64    0.28
   1  -7   4    0.42    0.14
  -2   7  -4   32.87    1.65
  -2   7  -4   35.80    1.43
  -2   7  -4   34.67    1.35
   2  -7   4   33.29    1.51
   2  -7   4   34.71    1.40
   2  -7   4   35.32    1.40
   2  -7   4   34.53    1.70
  -3   7  -4    9.00    0.57
  -3   7  -4    9.11    0.71
   3  -7   4   10.82    0.68
  -4   7  -4    4.34    0.53
   4  -7   4    3.48    0.47
  -5   7  -4    4.60    0.56
   5  -7   4    5.20    0.56
   5  -7   4    4.28    0.55
  -6   7  -4   -0.03    0.21
  -6   7  -4    0.11    0.25
   6  -7   4   -0.20    0.18
  -7   7  -4    0.76    0.37
  -7   7  -4    0.99    0.30
   7  -7   4    0.73    0.31
  -8   7  -4   -0.13    0.31
   8  -7   4    0.56    0.31
   8   6  -4    6.18    0.69
   8   6  -4    7.47    0.95
  -8  -6   4    6.42    0.91
  -8  -6   4    6.70    0.83
   7   6  -4    0.69    0.37
   7   6  -4    0.46    0.26
   7   6  -4    0.47    0.25
  -7  -6   4    0.39    0.38
  -7  -6   4    0.33    0.29
  -7  -6   4    0.21    0.24
   6   6  -4    1.98    0.34
   6   6  -4    1.81    0.37
   6   6  -4    1.74    0.45
  -6  -6   4    1.17    0.34
  -6  -6   4    1.84    0.37
  -6  -6   4    2.24    0.51
   5   6  -4    2.36    0.47
   5   6  -4    2.97    0.45
   5   6  -4    3.18    0.38
  -5  -6   4    2.82    0.42
  -5  -6   4    3.09    0.56
  -5  -6   4    3.29    0.47
   4   6  -4   30.74    1.50
   4   6  -4   30.39    1.55
   4   6  -4   30.30    1.30
  -4  -6   4   29.95    1.45
  -4  -6   4   31.11    1.60
  -4  -6   4   25.50    1.34
  -4  -6   4   29.91    1.47
   3   6  -4    4.87    0.54
   3   6  -4    4.11    0.33
   3   6  -4    3.92    0.50
  -3  -6   4    4.07    0.45
  -3  -6   4    4.52    0.48
  -3  -6   4    3.95    0.49
  -3  -6   4    3.93    0.52
   2   6  -4    0.19    0.21
   2   6  -4   -0.01    0.15
  -2  -6   4   -0.04    0.16
  -2  -6   4    0.05    0.18
  -2  -6   4    0.12    0.18
  -2  -6   4    0.37    0.18
   1   6  -4   -0.07    0.07
   1   6  -4   -0.01    0.12
   1   6  -4   -0.03    0.13
  -1  -6   4    0.08    0.14
  -1  -6   4   -0.05    0.12
  -1  -6   4    0.00    0.13
  -1  -6   4   -0.24    0.15
   0   6  -4   10.04    0.69
   0   6  -4   10.61    0.59
   0   6  -4   10.45    0.51
   0  -6   4   12.05    0.64
   0  -6   4   10.07    0.72
   0  -6   4   10.34    0.61
   0  -6   4    9.23    0.59
  -1   6  -4    0.26    0.11
  -1   6  -4   -0.10    0.15
  -1   6  -4    0.30    0.11
  -1   6  -4    0.33    0.08
   1  -6   4    0.06    0.18
   1  -6   4    0.40    0.18
   1  -6   4    0.27    0.12
   1  -6   4    0.32    0.13
  -2   6  -4    2.62    0.19
  -2   6  -4    2.90    0.30
  -2   6  -4    2.38    0.25
  -2   6  -4    1.86    0.35
   2  -6   4    1.98    0.31
   2  -6   4    2.62    0.23
   2  -6   4    2.50    0.40
   2  -6   4    2.35    0.23
  -3   6  -4   16.77    0.96
   3  -6   4   15.72    0.88
   3  -6   4   16.85    0.66
   3  -6   4   16.82    0.66
  -4   6  -4    5.66    0.57
   4  -6   4    5.25    0.49
   4  -6   4    5.42    0.56
  -5   6  -4    0.60    0.23
   5  -6   4    0.54    0.25
   5  -6   4    0.93    0.28
  -6   6  -4    0.59    0.33
  -6   6  -4    0.44    0.22
   6  -6   4    0.42    0.27
  -7   6  -4    9.97    0.72
  -7   6  -4   11.73    1.08
   7  -6   4   11.91    0.85
  -8   6  -4    0.23    0.33
   8  -6   4   -0.09    0.26
  -9   6  -4   -0.33    0.30
   9  -6   4   -0.54    0.24
   8   5  -4    6.72    0.70
   8   5  -4    5.46    0.79
  -8  -5   4    6.44    0.82
  -8  -5   4    5.69    0.83
   7   5  -4    1.65    0.46
   7   5  -4    1.38    0.31
   7   5  -4    1.71    0.36
  -7  -5   4    1.82    0.45
  -7  -5   4    1.65    0.50
  -7  -5   4    1.61    0.31
   6   5  -4    0.13    0.18
   6   5  -4   -0.02    0.17
   6   5  -4    0.14    0.27
  -6  -5   4    0.14    0.19
  -6  -5   4    0.11    0.23
  -6  -5   4    0.02    0.24
   5   5  -4    0.22    0.17
   5   5  -4   -0.07    0.16
   5   5  -4    0.03    0.24
  -5  -5   4   -0.25    0.18
  -5  -5   4   -0.03    0.24
  -5  -5   4    0.01    0.20
   4   5  -4    0.34    0.15
   4   5  -4    0.18    0.19
   4   5  -4    0.36    0.24
  -4  -5   4    0.28    0.13
  -4  -5   4    0.43    0.20
  -4  -5   4    0.00    0.20
  -4  -5   4    0.10    0.20
   3   5  -4    2.32    0.25
   3   5  -4    2.05    0.35
   3   5  -4    2.91    0.40
  -3  -5   4    2.36    0.16
  -3  -5   4    2.31    0.16
  -3  -5   4    1.39    0.28
  -3  -5   4    1.38    0.32
  -3  -5   4    2.32    0.35
  -3  -5   4    2.40    0.34
   2   5  -4    1.58    0.18
   2   5  -4    1.66    0.29
   2   5  -4    1.66    0.31
  -2  -5   4    1.39    0.28
  -2  -5   4    1.59    0.27
  -2  -5   4    1.07    0.26
  -2  -5   4    1.11    0.26
   1   5  -4   17.55    0.96
   1   5  -4   18.31    0.91
  -1  -5   4   17.09    0.92
  -1  -5   4   16.40    0.93
  -1  -5   4   20.89    0.96
  -1  -5   4   16.29    0.85
   0   5  -4    0.26    0.08
   0   5  -4    0.16    0.15
   0   5  -4    0.23    0.12
   0  -5   4    0.15    0.14
   0  -5   4    0.12    0.15
   0  -5   4    0.03    0.11
   0  -5   4    0.20    0.13
  -1   5  -4    3.79    0.23
  -1   5  -4    3.78    0.26
  -1   5  -4    3.66    0.27
  -1   5  -4    4.32    0.46
   1  -5   4    4.01    0.30
   1  -5   4    4.25    0.31
   1  -5   4    4.41    0.48
   1  -5   4    4.67    0.41
  -2   5  -4    5.33    0.30
  -2   5  -4    5.09    0.35
  -2   5  -4    5.68    0.53
  -2   5  -4    4.65    0.28
   2  -5   4    4.89    0.30
   2  -5   4    5.17    0.46
  -3   5  -4    1.23    0.27
   3  -5   4    1.21    0.21
   3  -5   4    1.35    0.14
   3  -5   4    0.78    0.23
   3  -5   4    1.32    0.13
  -4   5  -4    0.07    0.15
   4  -5   4    0.26    0.16
   4  -5   4   -0.04    0.16
   4  -5   4   -0.01    0.04
   4  -5   4    0.05    0.04
  -5   5  -4    0.08    0.16
   5  -5   4    0.05    0.04
   5  -5   4    0.10    0.04
   5  -5   4    0.01    0.15
   5  -5   4   -0.10    0.17
  -6   5  -4    4.49    0.48
  -6   5  -4    5.47    0.67
   6  -5   4    5.19    0.28
   6  -5   4    5.61    0.28
   6  -5   4    4.90    0.56
  -7   5  -4    0.00    0.17
  -7   5  -4   -0.29    0.25
   7  -5   4   -0.17    0.09
   7  -5   4   -0.15    0.20
  -8   5  -4    0.00    0.30
   8  -5   4    0.29    0.25
   8  -5   4   -0.11    0.10
  -9   5  -4    0.47    0.37
   9  -5   4    0.15    0.14
   9  -5   4    0.11    0.29
   9   4  -4    1.65    0.53
   9   4  -4    2.17    0.49
  -9  -4   4    0.94    0.45
  -9  -4   4    1.73    0.56
   8   4  -4    1.40    0.46
   8   4  -4    0.78    0.33
  -8  -4   4    1.57    0.51
  -8  -4   4    1.35    0.46
   7   4  -4    1.30    0.39
   7   4  -4    1.40    0.29
   7   4  -4    1.58    0.34
  -7  -4   4    1.70    0.47
  -7  -4   4    0.97    0.25
  -7  -4   4    1.53    0.43
   6   4  -4    2.36    0.36
   6   4  -4    2.26    0.45
   6   4  -4    2.88    0.38
  -6  -4   4    3.06    0.38
  -6  -4   4    2.39    0.46
  -6  -4   4    2.75    0.52
   5   4  -4    3.18    0.36
   5   4  -4    2.22    0.41
   5   4  -4    3.08    0.39
  -5  -4   4    2.77    0.35
  -5  -4   4    2.74    0.44
  -5  -4   4    1.93    0.43
   4   4  -4    2.76    0.37
   4   4  -4    2.47    0.28
   4   4  -4    2.09    0.39
  -4  -4   4    2.53    0.34
  -4  -4   4    2.08    0.39
  -4  -4   4    2.93    0.40
   3   4  -4   30.25    1.24
   3   4  -4   29.41    1.45
   3   4  -4   29.95    1.41
  -3  -4   4   31.00    1.39
  -3  -4   4   29.77    1.49
  -3  -4   4   30.95    1.21
  -3  -4   4   32.66    1.45
   2   4  -4   13.54    0.56
   2   4  -4   12.48    0.73
   2   4  -4   12.71    0.75
  -2  -4   4   13.28    0.72
  -2  -4   4   12.23    0.68
  -2  -4   4   12.25    0.48
  -2  -4   4   14.66    0.79
  -2  -4   4   12.35    0.73
  -2  -4   4   12.64    0.77
   1   4  -4    4.79    0.24
   1   4  -4    4.79    0.46
   1   4  -4    5.04    0.38
  -1  -4   4    3.96    0.41
  -1  -4   4    4.93    0.40
  -1  -4   4    4.36    0.45
  -1  -4   4    4.97    0.43
   0   4  -4    1.61    0.21
   0   4  -4    1.83    0.13
   0   4  -4    1.67    0.27
   0   4  -4    2.39    0.29
   0  -4   4    1.65    0.24
   0  -4   4    1.93    0.30
   0  -4   4    1.38    0.23
   0  -4   4    1.92    0.25
  -1   4  -4    9.61    0.44
  -1   4  -4    8.54    0.41
  -1   4  -4    9.04    0.48
  -1   4  -4   10.03    0.54
  -1   4  -4    8.59    0.59
   1  -4   4    9.26    0.49
   1  -4   4    9.62    0.50
   1  -4   4    8.44    0.59
   1  -4   4    9.53    0.54
  -2   4  -4   23.76    1.13
  -2   4  -4   24.32    1.00
  -2   4  -4   23.42    0.97
  -2   4  -4   22.76    0.96
   2  -4   4   22.82    0.98
   2  -4   4   24.02    1.06
   2  -4   4   22.98    0.98
  -3   4  -4   10.19    0.47
  -3   4  -4   10.15    0.65
  -3   4  -4   10.45    0.47
  -3   4  -4   11.34    0.60
   3  -4   4   11.13    0.58
   3  -4   4   10.43    0.49
   3  -4   4   11.08    0.49
   3  -4   4   10.38    0.62
  -4   4  -4    4.12    0.23
  -4   4  -4    4.29    0.22
  -4   4  -4    4.63    0.46
   4  -4   4    4.40    0.26
   4  -4   4    4.38    0.26
   4  -4   4    4.42    0.46
   4  -4   4    4.87    0.44
  -5   4  -4   16.86    0.88
   5  -4   4   16.28    0.73
   5  -4   4   14.30    0.89
   5  -4   4   17.70    0.74
   5  -4   4   17.54    0.92
  -6   4  -4    2.17    0.32
  -6   4  -4    1.80    0.19
   6  -4   4    1.68    0.21
   6  -4   4    1.68    0.33
   6  -4   4    1.85    0.22
  -7   4  -4   -0.05    0.24
  -7   4  -4   -0.07    0.14
   7  -4   4   -0.05    0.12
   7  -4   4   -0.06    0.19
  -8   4  -4    0.93    0.40
   8  -4   4    0.86    0.31
   8  -4   4    0.59    0.20
  -9   4  -4    0.54    0.38
   9  -4   4    0.57    0.31
   9  -4   4    0.48    0.21
 -10   4  -4   -0.23    0.26
  10  -4   4   -0.20    0.26
  10  -4   4    0.10    0.20
   9   3  -4    8.59    0.99
   9   3  -4   10.08    0.94
  -9  -3   4   10.85    1.10
  -9  -3   4    8.21    1.00
   8   3  -4   -0.12    0.20
   8   3  -4   -0.15    0.24
  -8  -3   4    0.32    0.27
  -8  -3   4    0.40    0.31
   7   3  -4    9.76    0.83
   7   3  -4   11.98    0.68
   7   3  -4   10.59    0.76
  -7  -3   4    9.54    0.96
  -7  -3   4   11.92    0.90
   6   3  -4    1.49    0.28
   6   3  -4    1.30    0.29
   6   3  -4    1.59    0.40
  -6  -3   4    1.34    0.40
  -6  -3   4    1.91    0.40
  -6  -3   4    1.57    0.25
   5   3  -4   27.97    1.24
   5   3  -4   27.04    1.25
   5   3  -4   26.56    1.20
   5   3  -4   28.93    1.45
  -5  -3   4   26.35    1.40
  -5  -3   4   27.11    1.46
  -5  -3   4   26.39    1.20
   4   3  -4    2.08    0.26
   4   3  -4    2.76    0.32
   4   3  -4    2.15    0.30
   4   3  -4    2.46    0.38
  -4  -3   4    2.43    0.36
  -4  -3   4    2.18    0.28
  -4  -3   4    2.47    0.41
   3   3  -4    8.66    0.59
   3   3  -4    7.83    0.50
   3   3  -4    7.57    0.52
   3   3  -4    8.08    0.43
  -3  -3   4    7.33    0.49
  -3  -3   4    8.41    0.43
  -3  -3   4    8.31    0.61
  -3  -3   4    7.27    0.54
   2   3  -4   24.67    1.17
   2   3  -4   24.92    0.99
   2   3  -4   26.88    1.17
   2   3  -4   24.46    1.19
  -2  -3   4   25.45    1.23
  -2  -3   4   25.67    1.19
  -2  -3   4   26.64    1.23
  -2  -3   4   25.34    1.16
  -2  -3   4   25.57    0.99
   1   3  -4   51.29    2.18
   1   3  -4   52.51    2.15
   1   3  -4   53.29    1.89
   1   3  -4   52.71    2.16
  -1  -3   4   51.68    2.03
  -1  -3   4   51.14    2.13
  -1  -3   4   52.76    2.18
  -1  -3   4   56.92    2.19
   0   3  -4   46.69    2.03
   0   3  -4   52.36    2.07
   0   3  -4   50.33    2.01
   0   3  -4   49.20    1.79
   0  -3   4   48.45    1.92
   0  -3   4   53.20    2.03
   0  -3   4   49.30    2.02
  -1   3  -4   27.65    1.06
  -1   3  -4   27.24    1.16
  -1   3  -4   28.46    1.06
  -1   3  -4   27.13    1.23
  -1   3  -4   27.32    1.15
   1  -3   4   26.63    1.15
   1  -3   4   27.18    1.04
   1  -3   4   25.54    1.14
   1  -3   4   28.19    1.16
  -2   3  -4   23.92    0.94
  -2   3  -4   22.97    0.94
  -2   3  -4   21.92    1.05
  -2   3  -4   22.37    0.94
   2  -3   4   23.37    0.93
   2  -3   4   22.26    0.94
   2  -3   4   22.61    0.99
   2  -3   4   18.48    0.91
  -3   3  -4    5.65    0.31
  -3   3  -4    5.42    0.42
  -3   3  -4    5.06    0.30
  -3   3  -4    6.19    0.39
   3  -3   4    4.72    0.38
   3  -3   4    5.57    0.31
   3  -3   4    5.28    0.36
  -4   3  -4    9.27    0.44
  -4   3  -4    8.51    0.42
  -4   3  -4    8.16    0.53
   4  -3   4    7.66    0.52
   4  -3   4    7.97    0.43
   4  -3   4    8.81    0.57
  -5   3  -4    0.08    0.10
  -5   3  -4   -0.11    0.09
   5  -3   4   -0.33    0.12
   5  -3   4    0.04    0.05
   5  -3   4    0.01    0.13
   5  -3   4    0.04    0.09
  -6   3  -4    3.48    0.33
  -6   3  -4    3.21    0.35
   6  -3   4    3.61    0.46
   6  -3   4    3.49    0.33
  -7   3  -4   -0.55    0.18
  -7   3  -4   -0.14    0.11
   7  -3   4   -0.10    0.12
   7  -3   4    0.03    0.20
  -8   3  -4    0.38    0.16
  -8   3  -4    0.44    0.34
   8  -3   4    0.37    0.20
   8  -3   4    0.38    0.26
  -9   3  -4   -0.16    0.28
   9  -3   4    0.15    0.19
   9  -3   4    0.30    0.28
 -10   3  -4   -0.38    0.26
  10  -3   4    0.10    0.29
  10  -3   4    0.02    0.22
   9   2  -4    0.88    0.35
   9   2  -4    0.38    0.36
  -9  -2   4    0.46    0.35
  -9  -2   4    1.55    0.49
   8   2  -4    2.51    0.52
   8   2  -4    1.92    0.41
  -8  -2   4    3.11    0.57
  -8  -2   4    2.29    0.53
   7   2  -4    0.22    0.25
   7   2  -4    0.00    0.18
   7   2  -4    0.09    0.13
  -7  -2   4   -0.10    0.24
  -7  -2   4    0.51    0.29
   6   2  -4    7.40    0.48
   6   2  -4    6.17    0.69
   6   2  -4    7.88    0.58
  -6  -2   4    7.46    0.74
  -6  -2   4    6.97    0.74
   5   2  -4   27.17    1.17
   5   2  -4   28.29    1.44
   5   2  -4   29.37    1.25
   5   2  -4   28.54    1.28
  -5  -2   4   26.50    1.44
  -5  -2   4   27.68    1.43
   4   2  -4    0.10    0.10
   4   2  -4    0.07    0.12
   4   2  -4    0.10    0.17
   4   2  -4    0.38    0.15
  -4  -2   4    0.34    0.19
  -4  -2   4    0.00    0.16
  -4  -2   4    0.03    0.13
   3   2  -4    1.86    0.25
   3   2  -4    2.63    0.27
   3   2  -4    1.95    0.30
   3   2  -4    2.19    0.22
  -3  -2   4    2.34    0.24
  -3  -2   4    2.51    0.35
  -3  -2   4    2.00    0.29
  -3  -2   4    1.61    0.20
  -3  -2   4    1.95    0.24
   2   2  -4   33.55    1.41
   2   2  -4   34.45    1.38
   2   2  -4   34.70    1.27
   2   2  -4   30.83    1.45
  -2  -2   4   32.90    1.29
  -2  -2   4   31.87    1.48
  -2  -2   4   33.12    1.48
  -2  -2   4   32.68    1.47
   1   2  -4    2.39    0.29
   1   2  -4    2.17    0.30
   1   2  -4    1.96    0.25
   1   2  -4    1.56    0.23
   1   2  -4    1.87    0.09
   1   2  -4    1.73    0.23
  -1  -2   4    1.83    0.26
  -1  -2   4    1.86    0.24
  -1  -2   4    2.04    0.27
  -1  -2   4    2.26    0.27
  -1  -2   4    2.11    0.14
   0   2  -4   24.34    1.02
   0   2  -4   23.64    1.09
   0   2  -4   23.29    1.06
   0   2  -4   23.23    1.06
   0   2  -4   23.05    1.05
   0   2  -4   23.65    1.08
   0   2  -4   24.59    0.91
   0  -2   4   24.74    1.06
   0  -2   4   24.78    1.02
   0  -2   4   24.88    1.08
   0  -2   4   24.13    0.92
   0  -2   4   24.34    1.07
  -1   2  -4   29.26    1.22
  -1   2  -4   30.19    1.20
  -1   2  -4   29.51    1.10
  -1   2  -4   28.11    1.21
  -1   2  -4   28.88    1.27
  -1   2  -4   29.76    1.27
  -1   2  -4   30.42    1.14
   1  -2   4   28.82    1.10
   1  -2   4   29.02    1.22
   1  -2   4   28.43    1.19
   1  -2   4   28.56    1.26
   1  -2   4   30.17    1.22
  -2   2  -4   15.33    0.69
  -2   2  -4   15.06    0.77
  -2   2  -4   14.20    0.76
  -2   2  -4   14.90    0.69
  -2   2  -4   16.67    0.75
  -2   2  -4   15.40    0.70
  -2   2  -4   17.26    0.69
   2  -2   4   14.81    0.67
   2  -2   4   15.89    0.73
   2  -2   4   15.47    0.70
   2  -2   4   15.79    0.70
   2  -2   4   15.00    0.76
  -3   2  -4    7.86    0.43
  -3   2  -4    7.19    0.48
  -3   2  -4    8.52    0.43
  -3   2  -4    8.91    0.49
   3  -2   4    8.46    0.43
   3  -2   4    8.36    0.47
   3  -2   4    8.03    0.43
   3  -2   4    9.22    0.52
   3  -2   4    7.77    0.49
  -4   2  -4   22.61    1.02
  -4   2  -4   22.38    0.98
   4  -2   4   22.40    1.05
   4  -2   4   22.82    0.98
   4  -2   4   21.67    1.03
   4  -2   4   22.53    0.98
   4  -2   4   22.11    1.02
  -5   2  -4    0.39    0.13
  -5   2  -4    0.45    0.15
   5  -2   4    0.32    0.14
   5  -2   4    0.58    0.19
   5  -2   4    0.51    0.15
   5  -2   4    0.48    0.16
   5  -2   4    0.13    0.16
  -6   2  -4    4.70    0.37
  -6   2  -4    5.14    0.38
   6  -2   4    3.58    0.45
   6  -2   4    3.65    0.37
   6  -2   4    4.96    0.38
  -7   2  -4    0.45    0.16
  -7   2  -4    0.02    0.24
  -7   2  -4    0.26    0.17
   7  -2   4    0.16    0.16
   7  -2   4    0.05    0.20
   7  -2   4    0.44    0.19
  -8   2  -4    0.24    0.13
  -8   2  -4    0.17    0.29
   8  -2   4    0.21    0.19
   8  -2   4    0.32    0.26
  -9   2  -4    0.58    0.37
   9  -2   4    0.17    0.28
   9  -2   4    0.54    0.26
 -10   2  -4    1.44    0.48
  10  -2   4    1.21    0.40
  10  -2   4    1.47    0.37
   9   1  -4    0.33    0.32
   9   1  -4    0.98    0.39
  -9  -1   4    0.59    0.38
  -9  -1   4    0.27    0.35
   8   1  -4    1.80    0.41
   8   1  -4    1.02    0.37
  -8  -1   4    0.69    0.35
  -8  -1   4    1.47    0.44
   7   1  -4    4.30    0.31
   7   1  -4    4.53    0.60
   7   1  -4    5.20    0.58
  -7  -1   4    3.63    0.58
  -7  -1   4    4.66    0.62
   6   1  -4    6.59    0.67
   6   1  -4    6.45    0.60
   6   1  -4    7.00    0.41
  -6  -1   4    6.18    0.69
  -6  -1   4    6.57    0.70
   5   1  -4    4.22    0.42
   5   1  -4    4.31    0.32
   5   1  -4    4.32    0.50
   5   1  -4    3.74    0.25
  -5  -1   4    3.77    0.49
  -5  -1   4    4.11    0.51
   4   1  -4   14.55    0.66
   4   1  -4   15.59    0.73
   4   1  -4   14.39    0.85
   4   1  -4   15.84    0.76
  -4  -1   4   13.29    0.84
  -4  -1   4   14.46    0.86
   3   1  -4    1.12    0.18
   3   1  -4    0.82    0.15
   3   1  -4    0.73    0.18
   3   1  -4    1.26    0.16
  -3  -1   4    1.13    0.17
  -3  -1   4    0.97    0.22
  -3  -1   4    0.74    0.20
   2   1  -4  134.99    5.25
   2   1  -4  137.13    4.95
   2   1  -4  139.08    5.02
   2   1  -4  149.61    5.40
   2   1  -4  133.65    5.04
  -2  -1   4  135.45    5.26
  -2  -1   4  140.88    5.26
  -2  -1   4  137.76    4.96
  -2  -1   4  133.93    5.04
  -2  -1   4  134.70    5.01
  -2  -1   4  134.34    5.30
   1   1  -4   34.57    1.35
   1   1  -4   35.60    1.41
   1   1  -4   33.35    1.43
   1   1  -4   35.61    1.51
   1   1  -4   34.32    1.47
   1   1  -4   34.89    1.49
  -1  -1   4   33.45    1.49
  -1  -1   4   37.80    1.50
  -1  -1   4   35.83    1.44
  -1  -1   4   34.81    1.29
  -1  -1   4   33.69    1.34
  -1  -1   4   35.71    1.50
   0   1  -4  161.25    5.80
   0   1  -4  158.90    5.95
   0   1  -4  167.34    6.04
   0   1  -4  157.17    5.71
   0   1  -4  159.49    5.80
   0   1  -4  160.38    5.94
   0  -1   4  159.35    5.57
   0  -1   4  161.86    5.96
   0  -1   4  155.19    5.71
   0  -1   4  160.68    5.80
   0  -1   4  137.22    5.61
   0  -1   4  167.10    5.95
  -1   1  -4  268.87    9.85
  -1   1  -4  283.37    9.82
  -1   1  -4  280.23   10.11
  -1   1  -4  280.56    9.48
  -1   1  -4  273.88   10.10
   1  -1   4  267.62   10.10
   1  -1   4  278.41   10.10
   1  -1   4  257.83    9.47
   1  -1   4  275.91    9.85
   1  -1   4  272.24    9.72
   1  -1   4  272.25    9.81
  -2   1  -4   73.73    2.62
  -2   1  -4   72.64    2.74
  -2   1  -4   71.92    2.74
  -2   1  -4   71.28    2.68
  -2   1  -4   71.14    2.72
   2  -1   4   70.79    2.72
   2  -1   4   67.98    2.61
   2  -1   4   69.89    2.73
   2  -1   4   74.10    2.74
   2  -1   4   68.44    2.64
  -3   1  -4    1.21    0.18
  -3   1  -4    1.48    0.22
  -3   1  -4    1.49    0.22
  -3   1  -4    1.88    0.23
  -3   1  -4    1.26    0.17
   3  -1   4    1.46    0.19
   3  -1   4    1.30    0.20
   3  -1   4    1.13    0.18
   3  -1   4    1.26    0.20
   3  -1   4    1.31    0.21
  -4   1  -4   10.71    0.60
  -4   1  -4   11.12    0.60
   4  -1   4   11.08    0.63
   4  -1   4   12.79    0.63
   4  -1   4   10.84    0.59
   4  -1   4   11.96    0.61
   4  -1   4   11.52    0.64
  -5   1  -4    8.68    0.51
  -5   1  -4    8.65    0.53
   5  -1   4    9.54    0.55
   5  -1   4    8.99    0.51
   5  -1   4    7.66    0.54
   5  -1   4    8.81    0.53
   5  -1   4    7.88    0.58
  -6   1  -4    0.60    0.19
  -6   1  -4    0.24    0.13
   6  -1   4    0.54    0.15
   6  -1   4    0.42    0.22
   6  -1   4    0.20    0.15
   6  -1   4    0.46    0.18
  -7   1  -4    0.20    0.12
  -7   1  -4   -0.20    0.13
  -7   1  -4    0.06    0.23
   7  -1   4   -0.07    0.15
   7  -1   4    0.13    0.12
   7  -1   4    0.23    0.23
   7  -1   4    0.33    0.21
  -8   1  -4    4.66    0.53
  -8   1  -4    4.71    0.68
  -8   1  -4    4.84    0.35
   8  -1   4    4.48    0.52
   8  -1   4    4.44    0.59
  -9   1  -4    6.41    0.83
   9  -1   4    4.27    0.55
   9  -1   4    5.73    0.71
 -10   1  -4    1.13    0.46
  10  -1   4    1.34    0.39
  10  -1   4    1.01    0.41
   9   0  -4    0.66    0.36
   9   0  -4    1.57    0.41
  -9   0   4    2.25    0.51
  -9   0   4    1.13    0.45
   8   0  -4    0.73    0.33
   8   0  -4    0.40    0.29
  -8   0   4    0.24    0.28
  -8   0   4    0.27    0.31
   7   0  -4    6.52    0.73
   7   0  -4    7.85    0.72
  -7   0   4    6.97    0.79
  -7   0   4    7.31    0.76
   6   0  -4    4.19    0.27
   6   0  -4    3.61    0.49
   6   0  -4    5.48    0.54
  -6   0   4    4.34    0.58
  -6   0   4    4.04    0.54
   5   0  -4    6.61    0.38
   5   0  -4    7.09    0.57
   5   0  -4    6.66    0.50
  -5   0   4    6.81    0.66
  -5   0   4    6.68    0.64
   4   0  -4   -0.10    0.13
   4   0  -4   -0.10    0.07
   4   0  -4    0.03    0.05
   4   0  -4   -0.18    0.10
  -4   0   4    0.08    0.12
  -4   0   4    0.22    0.17
  -4   0   4   -0.15    0.09
   3   0  -4    0.25    0.15
   3   0  -4    0.23    0.13
   3   0  -4    0.19    0.07
   3   0  -4    0.20    0.11
   3   0  -4    0.31    0.11
  -3   0   4   -0.07    0.13
  -3   0   4    0.18    0.14
  -3   0   4    0.16    0.10
  -3   0   4    0.24    0.10
  -3   0   4    0.10    0.11
   2   0  -4   58.80    2.39
   2   0  -4   58.06    2.19
   2   0  -4   56.71    2.36
   2   0  -4   58.50    2.24
   2   0  -4   61.01    2.42
   2   0  -4   59.23    2.20
  -2   0   4   55.40    2.24
  -2   0   4   59.35    2.20
  -2   0   4   56.30    2.37
  -2   0   4   58.69    2.24
  -2   0   4   57.28    2.40
  -2   0   4   60.73    2.38
   1   0  -4   80.46    3.28
   1   0  -4   83.13    3.17
   1   0  -4   86.06    3.15
   1   0  -4   85.69    3.31
   1   0  -4   88.78    3.36
  -1   0   4   81.72    3.29
  -1   0   4   84.41    3.14
  -1   0   4   86.47    3.08
  -1   0   4   88.25    3.30
  -1   0   4   84.21    3.17
  -1   0   4   84.09    3.33
   0   0  -4    2.91    0.28
   0   0  -4    2.11    0.23
   0   0  -4    1.86    0.22
   0   0  -4    2.07    0.17
   0   0  -4    2.35    0.25
   0   0   4    2.16    0.23
   0   0   4    1.98    0.23
   0   0   4    2.37    0.25
   0   0   4    2.29    0.18
   0   0   4    2.33    0.25
  -1   0  -4   74.46    2.88
  -1   0  -4   74.63    2.78
  -1   0  -4   73.31    2.83
  -1   0  -4   78.15    2.71
  -1   0  -4   77.33    2.89
   1   0   4   76.98    2.88
   1   0   4   77.23    2.84
   1   0   4   71.66    2.87
   1   0   4   71.34    2.69
   1   0   4   72.82    2.78
  -2   0  -4  175.49    6.22
  -2   0  -4  173.52    5.98
  -2   0  -4  169.06    6.37
  -2   0  -4  172.84    6.37
  -2   0  -4  169.32    6.21
   2   0   4  165.02    6.36
   2   0   4  173.82    6.38
   2   0   4  167.91    5.98
   2   0   4  169.87    6.22
   2   0   4  167.35    6.16
   2   0   4  175.67    6.22
  -3   0  -4   41.65    1.75
  -3   0  -4   41.92    1.72
  -3   0  -4   45.51    1.67
  -3   0  -4   43.28    1.74
  -3   0  -4   42.54    1.74
   3   0   4   40.97    1.74
   3   0   4   42.55    1.72
   3   0   4   45.65    1.76
   3   0   4   41.71    1.67
   3   0   4   44.51    1.73
  -4   0  -4    3.68    0.36
  -4   0  -4    4.35    0.32
   4   0   4    3.70    0.37
   4   0   4    4.26    0.39
   4   0   4    4.17    0.34
   4   0   4    4.40    0.35
   4   0   4    4.02    0.36
  -5   0  -4   16.93    0.85
  -5   0  -4   18.30    0.94
   5   0   4   17.65    0.94
   5   0   4   19.25    0.94
   5   0   4   19.34    0.93
   5   0   4   18.83    0.86
  -6   0  -4    1.64    0.28
  -6   0  -4    2.06    0.26
   6   0   4    1.54    0.23
   6   0   4    1.39    0.28
   6   0   4    1.99    0.32
   6   0   4    1.75    0.32
  -7   0  -4    0.27    0.23
  -7   0  -4    0.35    0.13
  -7   0  -4    0.07    0.18
   7   0   4   -0.06    0.19
   7   0   4    0.21    0.12
   7   0   4    0.13    0.20
   7   0   4    0.56    0.21
  -8   0  -4    1.07    0.36
  -8   0  -4    0.16    0.20
   8   0   4    0.39    0.26
   8   0   4   -0.01    0.17
  -9   0  -4    3.07    0.58
   9   0   4    2.80    0.46
   9   0   4    2.31    0.49
 -10   0  -4    0.03    0.28
  10   0   4   -0.19    0.21
  10   0   4    0.04    0.26
   9  -1  -4    1.20    0.40
   9  -1  -4    1.16    0.43
  -9   1   4    0.65    0.40
  -9   1   4    0.88    0.36
   8  -1  -4    0.12    0.25
   8  -1  -4    0.05    0.25
  -8   1   4    0.44    0.30
  -8   1   4    0.18    0.30
   7  -1  -4    1.52    0.36
   7  -1  -4    1.99    0.40
  -7   1   4    1.64    0.39
  -7   1   4    1.50    0.42
   6  -1  -4    2.32    0.38
   6  -1  -4    2.04    0.38
  -6   1   4    1.81    0.40
  -6   1   4    2.38    0.40
   5  -1  -4    0.24    0.08
   5  -1  -4    0.25    0.16
   5  -1  -4    0.28    0.19
  -5   1   4    0.03    0.16
  -5   1   4    0.26    0.22
  -5   1   4    0.48    0.23
   4  -1  -4    3.46    0.41
   4  -1  -4    4.46    0.42
   4  -1  -4    3.94    0.27
  -4   1   4    4.01    0.44
  -4   1   4    3.57    0.25
  -4   1   4    3.46    0.39
  -4   1   4    3.56    0.45
   3  -1  -4   92.81    3.30
   3  -1  -4   90.48    3.37
   3  -1  -4   88.10    3.58
   3  -1  -4   94.26    3.63
   3  -1  -4   89.92    3.43
  -3   1   4   91.57    3.50
  -3   1   4   90.85    3.66
  -3   1   4   92.23    3.44
  -3   1   4   92.28    3.37
  -3   1   4   88.90    3.60
   2  -1  -4    8.50    0.52
   2  -1  -4    8.23    0.50
   2  -1  -4    7.78    0.50
   2  -1  -4    8.37    0.44
   2  -1  -4    7.46    0.43
  -2   1   4    7.36    0.43
  -2   1   4    7.87    0.49
  -2   1   4    7.81    0.51
  -2   1   4    8.21    0.51
  -2   1   4    8.51    0.44
  -2   1   4    8.78    0.47
   1  -1  -4   31.57    1.37
   1  -1  -4   33.42    1.40
   1  -1  -4   33.13    1.39
   1  -1  -4   33.47    1.32
   1  -1  -4   33.40    1.32
  -1   1   4   31.49    1.39
  -1   1   4   32.06    1.27
  -1   1   4   30.49    1.37
  -1   1   4   30.99    1.31
  -1   1   4   33.07    1.38
  -1   1   4   34.52    1.33
   0  -1  -4   14.64    0.71
   0  -1  -4   13.94    0.68
   0  -1  -4   14.62    0.66
   0  -1  -4   14.05    0.70
   0  -1  -4   15.85    0.72
   0   1   4   14.32    0.64
   0   1   4   13.51    0.69
   0   1   4   15.05    0.71
   0   1   4   15.82    0.70
   0   1   4   14.40    0.66
   0   1   4   15.60    0.71
  -1  -1  -4   65.56    2.51
  -1  -1  -4   68.28    2.38
  -1  -1  -4   62.66    2.56
  -1  -1  -4   67.71    2.57
  -1  -1  -4   66.65    2.49
   1   1   4   64.65    2.37
   1   1   4   67.20    2.57
   1   1   4   68.35    2.52
   1   1   4   63.75    2.56
   1   1   4   64.01    2.48
  -2  -1  -4    4.39    0.32
  -2  -1  -4    3.78    0.31
  -2  -1  -4    4.57    0.31
  -2  -1  -4    5.01    0.32
  -2  -1  -4    4.52    0.28
   2   1   4    4.65    0.32
   2   1   4    4.74    0.32
   2   1   4    4.96    0.33
   2   1   4    3.93    0.29
   2   1   4    4.31    0.28
  -3  -1  -4   31.49    1.26
  -3  -1  -4   29.03    1.16
  -3  -1  -4   27.40    1.24
  -3  -1  -4   28.79    1.23
  -3  -1  -4   28.69    1.27
   3   1   4   28.25    1.26
   3   1   4   27.79    1.22
   3   1   4   29.51    1.23
   3   1   4   30.58    1.28
   3   1   4   29.23    1.18
  -4  -1  -4   47.48    1.98
  -4  -1  -4   44.21    1.87
   4   1   4   47.29    1.84
   4   1   4   48.62    1.97
   4   1   4   47.26    1.88
   4   1   4   44.78    1.92
   4   1   4   51.24    1.99
  -5  -1  -4   17.93    0.95
  -5  -1  -4   17.09    0.85
   5   1   4   17.53    0.95
   5   1   4   18.46    0.95
   5   1   4   18.88    0.87
   5   1   4   19.37    0.96
  -6  -1  -4    4.73    0.50
  -6  -1  -4    4.91    0.37
  -6  -1  -4    5.03    0.57
   6   1   4    5.59    0.40
   6   1   4    6.31    0.57
   6   1   4    4.59    0.47
   6   1   4    4.84    0.52
  -7  -1  -4    3.88    0.36
  -7  -1  -4    3.35    0.49
  -7  -1  -4    3.84    0.55
   7   1   4    4.62    0.40
   7   1   4    3.39    0.48
   7   1   4    4.24    0.50
  -8  -1  -4    6.67    0.77
  -8  -1  -4    6.70    0.69
   8   1   4    6.72    0.72
   8   1   4    5.70    0.64
  -9  -1  -4    0.45    0.26
  -9  -1  -4    0.70    0.33
   9   1   4    0.48    0.29
   9   1   4    0.32    0.25
 -10  -1  -4    0.47    0.32
  10   1   4   -0.02    0.28
  10   1   4   -0.33    0.19
 -11  -1  -4   -0.27    0.28
  11   1   4    0.04    0.28
  11   1   4    0.19    0.34
   9  -2  -4    0.17    0.26
   9  -2  -4    0.31    0.32
  -9   2   4   -0.43    0.22
  -9   2   4   -0.48    0.26
   8  -2  -4   -0.11    0.20
   8  -2  -4   -0.13    0.24
  -8   2   4    0.03    0.21
  -8   2   4    0.23    0.26
  -8   2   4   -0.36    0.23
   7  -2  -4    0.88    0.32
   7  -2  -4    0.65    0.28
  -7   2   4    0.74    0.36
  -7   2   4    0.89    0.29
  -7   2   4    0.28    0.27
   6  -2  -4   11.58    0.79
   6  -2  -4   11.69    0.78
  -6   2   4   10.80    0.84
  -6   2   4   10.55    0.79
  -6   2   4   11.57    0.79
   5  -2  -4    0.13    0.18
   5  -2  -4    0.10    0.17
  -5   2   4    0.34    0.23
  -5   2   4    0.23    0.18
  -5   2   4    0.15    0.18
   4  -2  -4   11.33    0.70
   4  -2  -4   10.21    0.66
   4  -2  -4   10.31    0.64
   4  -2  -4   11.74    0.53
  -4   2   4   10.13    0.72
  -4   2   4   11.37    0.53
  -4   2   4   11.70    0.70
  -4   2   4   11.46    0.70
   3  -2  -4   10.87    0.53
   3  -2  -4   10.11    0.46
   3  -2  -4   11.65    0.61
   3  -2  -4   10.16    0.62
   3  -2  -4   10.79    0.65
  -3   2   4   11.20    0.64
  -3   2   4   11.96    0.70
  -3   2   4   11.82    0.66
  -3   2   4   11.29    0.54
   2  -2  -4   22.18    0.97
   2  -2  -4   22.15    0.95
   2  -2  -4   23.40    1.08
   2  -2  -4   22.22    1.03
   2  -2  -4   23.72    1.06
  -2   2   4   22.34    1.01
  -2   2   4   20.21    1.04
  -2   2   4   22.14    1.04
  -2   2   4   21.94    0.97
  -2   2   4   24.02    0.97
   1  -2  -4    4.46    0.32
   1  -2  -4    4.37    0.30
   1  -2  -4    3.70    0.30
   1  -2  -4    3.75    0.29
   1  -2  -4    4.26    0.31
  -1   2   4    3.98    0.27
  -1   2   4    4.76    0.33
  -1   2   4    4.19    0.32
  -1   2   4    4.28    0.32
  -1   2   4    4.48    0.32
  -1   2   4    4.26    0.30
   0  -2  -4  149.70    5.83
   0  -2  -4  159.27    5.84
   0  -2  -4  163.40    5.89
   0  -2  -4  149.71    5.65
   0  -2  -4  158.18    5.69
   0   2   4  152.68    5.40
   0   2   4  152.04    5.88
   0   2   4  160.76    5.67
   0   2   4  149.62    5.83
   0   2   4  162.53    5.84
   0   2   4  152.07    5.69
  -1  -2  -4  136.88    5.01
  -1  -2  -4  135.70    4.62
  -1  -2  -4  128.18    4.86
  -1  -2  -4  135.70    4.88
  -1  -2  -4  126.50    4.99
   1   2   4  128.95    4.87
   1   2   4  138.57    5.01
   1   2   4  135.04    4.87
   1   2   4  128.61    4.99
   1   2   4  130.68    4.61
  -2  -2  -4   23.24    1.00
  -2  -2  -4   22.82    1.01
  -2  -2  -4   24.15    1.03
  -2  -2  -4   23.53    0.91
  -2  -2  -4   21.53    1.03
   2   2   4   23.42    1.04
   2   2   4   22.35    0.99
   2   2   4   22.41    0.90
   2   2   4   23.34    1.02
   2   2   4   22.43    1.03
  -3  -2  -4   56.12    2.24
  -3  -2  -4   58.70    2.06
  -3  -2  -4   57.06    2.20
  -3  -2  -4   53.42    2.17
  -3  -2  -4   54.63    2.25
   3   2   4   54.92    2.05
   3   2   4   54.85    2.20
   3   2   4   52.19    2.24
   3   2   4   55.88    2.26
   3   2   4   57.06    2.18
  -4  -2  -4   18.71    0.85
  -4  -2  -4   18.73    0.96
  -4  -2  -4   18.28    0.89
   4   2   4   19.20    0.94
   4   2   4   19.92    0.97
   4   2   4   19.71    0.91
   4   2   4   19.22    0.96
  -5  -2  -4    0.76    0.18
  -5  -2  -4    0.92    0.24
   5   2   4    0.81    0.23
   5   2   4    1.03    0.25
   5   2   4    0.93    0.20
   5   2   4    0.47    0.20
  -6  -2  -4    0.19    0.14
  -6  -2  -4    0.30    0.20
  -6  -2  -4   -0.13    0.17
   6   2   4    0.00    0.16
   6   2   4    0.70    0.18
   6   2   4    0.07    0.17
  -7  -2  -4    0.00    0.22
  -7  -2  -4    0.00    0.20
   7   2   4   -0.08    0.13
   7   2   4   -0.14    0.17
   7   2   4   -0.19    0.16
  -8  -2  -4    0.70    0.29
  -8  -2  -4    0.23    0.25
   8   2   4    0.23    0.24
   8   2   4   -0.02    0.21
  -9  -2  -4   -0.22    0.20
  -9  -2  -4    0.12    0.25
   9   2   4   -0.09    0.22
   9   2   4   -0.17    0.19
 -10  -2  -4    0.44    0.31
  10   2   4    0.01    0.28
  10   2   4   -0.27    0.25
 -11  -2  -4    0.27    0.32
  11   2   4   -0.10    0.31
  11   2   4   -0.04    0.31
   9  -3  -4    0.58    0.37
  -9   3   4    0.87    0.40
  -9   3   4    0.09    0.37
   8  -3  -4    0.18    0.27
   8  -3  -4    0.01    0.20
  -8   3   4   -0.10    0.29
  -8   3   4    0.07    0.27
   7  -3  -4    0.38    0.24
   7  -3  -4   -0.01    0.22
  -7   3   4    0.08    0.24
  -7   3   4    0.28    0.32
  -7   3   4    0.29    0.28
   6  -3  -4    0.93    0.27
   6  -3  -4    1.85    0.37
  -6   3   4    1.66    0.34
  -6   3   4    1.76    0.35
  -6   3   4    1.15    0.35
   5  -3  -4    0.87    0.25
   5  -3  -4    1.38    0.30
   5  -3  -4    0.84    0.27
  -5   3   4    1.08    0.13
  -5   3   4    0.76    0.27
  -5   3   4    1.25    0.28
  -5   3   4    1.26    0.32
   4  -3  -4   18.67    0.98
   4  -3  -4   20.01    1.00
   4  -3  -4   18.86    0.72
   4  -3  -4   21.41    1.04
  -4   3   4   19.75    1.01
  -4   3   4   20.80    0.85
  -4   3   4   20.77    1.09
  -4   3   4   17.78    1.01
   3  -3  -4   12.98    0.71
   3  -3  -4   13.96    0.57
   3  -3  -4   12.47    0.70
   3  -3  -4   13.03    0.63
   3  -3  -4   13.75    0.75
  -3   3   4   12.66    0.71
  -3   3   4   13.79    0.64
  -3   3   4   12.74    0.74
  -3   3   4   13.77    0.79
   2  -3  -4    1.46    0.22
   2  -3  -4    1.16    0.17
   2  -3  -4    1.72    0.23
   2  -3  -4    1.28    0.16
   2  -3  -4    1.76    0.27
  -2   3   4    1.50    0.20
  -2   3   4    1.54    0.25
  -2   3   4    0.97    0.19
  -2   3   4    1.35    0.23
   1  -3  -4    7.38    0.44
   1  -3  -4    7.49    0.45
   1  -3  -4    7.16    0.43
   1  -3  -4    7.26    0.42
   1  -3  -4    7.00    0.43
  -1   3   4    7.37    0.43
  -1   3   4    6.61    0.41
  -1   3   4    7.19    0.45
  -1   3   4    6.36    0.42
  -1   3   4    6.55    0.42
  -1   3   4    7.01    0.43
   0  -3  -4    5.32    0.35
   0  -3  -4    4.79    0.34
   0  -3  -4    4.68    0.34
   0  -3  -4    4.99    0.32
   0  -3  -4    4.66    0.33
   0   3   4    4.89    0.34
   0   3   4    5.37    0.35
   0   3   4    4.72    0.33
   0   3   4    4.58    0.34
   0   3   4    4.61    0.31
  -1  -3  -4    5.02    0.30
  -1  -3  -4    4.38    0.33
  -1  -3  -4    4.72    0.33
  -1  -3  -4    4.73    0.34
  -1  -3  -4    4.14    0.33
   1   3   4    4.71    0.34
   1   3   4    4.29    0.33
   1   3   4    5.28    0.34
   1   3   4    3.89    0.31
   1   3   4    3.99    0.23
  -2  -3  -4   -0.10    0.09
  -2  -3  -4    0.02    0.09
  -2  -3  -4    0.01    0.11
  -2  -3  -4    0.12    0.07
  -2  -3  -4   -0.02    0.10
   2   3   4    0.07    0.12
   2   3   4   -0.05    0.10
   2   3   4    0.19    0.07
   2   3   4    0.16    0.11
   2   3   4   -0.11    0.10
  -3  -3  -4   11.86    0.65
  -3  -3  -4   11.45    0.65
  -3  -3  -4   11.69    0.51
  -3  -3  -4   10.34    0.59
   3   3   4   11.52    0.64
   3   3   4    9.85    0.59
   3   3   4   10.97    0.60
   3   3   4    9.59    0.61
   3   3   4   10.24    0.50
  -4  -3  -4   77.02    3.17
  -4  -3  -4   80.12    2.86
  -4  -3  -4   72.70    3.00
   4   3   4   83.60    3.20
   4   3   4   80.23    3.03
   4   3   4   76.71    3.15
  -5  -3  -4    7.45    0.57
   5   3   4    7.50    0.55
   5   3   4    6.87    0.55
  -6  -3  -4    0.53    0.23
  -6  -3  -4    0.22    0.18
   6   3   4    0.49    0.24
   6   3   4    0.06    0.17
  -7  -3  -4   -0.01    0.21
  -7  -3  -4   -0.28    0.16
   7   3   4   -0.05    0.20
   7   3   4   -0.17    0.18
  -8  -3  -4    0.46    0.29
  -8  -3  -4    0.35    0.23
   8   3   4    0.18    0.23
   8   3   4    0.71    0.30
  -9  -3  -4    5.13    0.69
  -9  -3  -4    4.35    0.67
  -9  -3  -4    5.16    0.57
   9   3   4    4.66    0.66
   9   3   4    5.65    0.71
 -10  -3  -4    0.19    0.27
 -10  -3  -4    0.59    0.32
  10   3   4   -0.03    0.31
  10   3   4    0.07    0.27
   9  -4  -4    1.08    0.43
   9  -4  -4    0.44    0.32
  -9   4   4   -0.21    0.28
  -9   4   4    0.41    0.39
   8  -4  -4   -0.05    0.19
   8  -4  -4   -0.17    0.25
  -8   4   4   -0.07    0.30
  -8   4   4   -0.07    0.25
   7  -4  -4    8.29    0.68
   7  -4  -4    7.26    0.79
  -7   4   4    7.66    0.72
  -7   4   4    6.56    0.79
  -7   4   4    7.74    0.82
   6  -4  -4    2.43    0.45
   6  -4  -4    2.67    0.40
  -6   4   4    2.11    0.44
  -6   4   4    2.64    0.47
  -6   4   4    2.30    0.38
   5  -4  -4    7.62    0.57
   5  -4  -4    7.98    0.57
   5  -4  -4    6.69    0.64
  -5   4   4    6.85    0.68
  -5   4   4    7.41    0.71
  -5   4   4    7.35    0.39
  -5   4   4    7.22    0.56
   4  -4  -4    4.68    0.48
   4  -4  -4    4.22    0.43
   4  -4  -4    4.21    0.25
   4  -4  -4    4.53    0.48
  -4   4   4    3.92    0.48
  -4   4   4    5.20    0.52
  -4   4   4    5.42    0.48
  -4   4   4    4.89    0.32
   3  -4  -4    2.10    0.31
   3  -4  -4    2.55    0.30
   3  -4  -4    2.64    0.24
  -3   4   4    2.74    0.36
  -3   4   4    2.69    0.27
  -3   4   4    2.21    0.29
  -3   4   4    2.51    0.33
   2  -4  -4   22.14    1.06
   2  -4  -4   22.26    1.03
   2  -4  -4   20.34    1.00
   2  -4  -4   22.51    0.95
  -2   4   4   23.22    1.02
  -2   4   4   21.36    1.05
  -2   4   4   24.47    1.00
  -2   4   4   19.38    1.02
   1  -4  -4   70.29    2.57
   1  -4  -4   61.00    2.53
   1  -4  -4   66.90    2.57
   1  -4  -4   63.05    2.48
   1  -4  -4   60.84    2.45
  -1   4   4   62.76    2.55
  -1   4   4   61.06    2.52
  -1   4   4   68.14    2.50
  -1   4   4   63.09    2.54
   0  -4  -4   10.21    0.58
   0  -4  -4   11.21    0.60
   0  -4  -4   11.50    0.61
   0  -4  -4   12.10    0.62
   0  -4  -4   11.11    0.55
   0  -4  -4   11.34    0.59
   0   4   4   10.46    0.59
   0   4   4   11.37    0.55
   0   4   4   10.15    0.58
   0   4   4   11.25    0.61
   0   4   4   10.10    0.58
  -1  -4  -4    0.53    0.12
  -1  -4  -4    0.43    0.15
  -1  -4  -4    0.77    0.16
  -1  -4  -4    0.63    0.16
  -1  -4  -4    0.65    0.15
   1   4   4    0.23    0.13
   1   4   4    0.56    0.07
   1   4   4    0.67    0.17
   1   4   4    0.43    0.15
   1   4   4    1.01    0.19
  -2  -4  -4    0.14    0.12
  -2  -4  -4    0.04    0.11
  -2  -4  -4    0.05    0.10
  -2  -4  -4    0.08    0.05
  -2  -4  -4    0.06    0.11
   2   4   4   -0.14    0.09
   2   4   4   -0.21    0.08
   2   4   4    0.01    0.05
   2   4   4    0.03    0.12
  -3  -4  -4    5.76    0.46
  -3  -4  -4    5.91    0.31
   3   4   4    6.03    0.44
   3   4   4    5.94    0.45
  -4  -4  -4    6.96    0.53
  -4  -4  -4    6.39    0.37
   4   4   4    6.17    0.46
   4   4   4    5.94    0.49
  -5  -4  -4    2.62    0.35
  -5  -4  -4    3.33    0.44
   5   4   4    3.00    0.40
  -6  -4  -4   26.64    1.42
  -6  -4  -4   27.40    1.37
   6   4   4   26.86    1.40
   6   4   4   28.36    1.39
  -7  -4  -4   16.88    1.00
  -7  -4  -4   17.26    1.11
  -7  -4  -4   18.53    1.09
   7   4   4   17.96    1.07
   7   4   4   17.24    1.08
  -8  -4  -4    0.71    0.28
  -8  -4  -4    0.54    0.23
  -8  -4  -4    1.07    0.37
   8   4   4    0.81    0.34
   8   4   4    0.73    0.32
  -9  -4  -4    0.95    0.38
  -9  -4  -4    0.73    0.35
  -9  -4  -4    0.81    0.28
   9   4   4    1.13    0.40
   9   4   4    1.01    0.40
 -10  -4  -4    2.95    0.60
 -10  -4  -4    2.95    0.59
 -10  -4  -4    3.01    0.47
  10   4   4    2.85    0.56
   9  -5  -4    0.57    0.39
   9  -5  -4    0.20    0.25
  -9   5   4   -0.19    0.26
  -9   5   4   -0.48    0.33
   8  -5  -4    1.09    0.42
   8  -5  -4    0.80    0.29
  -8   5   4    1.03    0.46
  -8   5   4    0.83    0.36
   7  -5  -4    8.46    0.86
   7  -5  -4    8.01    0.65
  -7   5   4    7.27    0.83
  -7   5   4    7.59    0.82
   6  -5  -4    5.00    0.63
   6  -5  -4    4.64    0.51
  -6   5   4    5.24    0.53
  -6   5   4    5.04    0.64
  -6   5   4    4.30    0.62
   5  -5  -4   -0.08    0.16
   5  -5  -4   -0.02    0.15
   5  -5  -4   -0.19    0.18
  -5   5   4    0.09    0.10
  -5   5   4   -0.34    0.20
  -5   5   4    0.04    0.22
  -5   5   4   -0.31    0.13
   4  -5  -4    6.29    0.56
   4  -5  -4    5.61    0.44
   4  -5  -4    6.07    0.36
  -4   5   4    5.96    0.45
  -4   5   4    5.86    0.60
  -4   5   4    6.65    0.42
  -4   5   4    6.18    0.62
   3  -5  -4    3.49    0.31
   3  -5  -4    2.84    0.34
   3  -5  -4    3.01    0.33
  -3   5   4    3.30    0.35
  -3   5   4    3.52    0.41
  -3   5   4    2.79    0.38
  -3   5   4    3.39    0.33
   2  -5  -4    1.14    0.23
   2  -5  -4    1.49    0.21
   2  -5  -4    1.31    0.22
   2  -5  -4    1.18    0.21
  -2   5   4    1.15    0.21
  -2   5   4    1.33    0.22
  -2   5   4    1.41    0.26
  -2   5   4    1.23    0.22
   1  -5  -4   55.99    2.17
   1  -5  -4   55.99    2.16
   1  -5  -4   50.11    2.10
   1  -5  -4   49.40    2.14
  -1   5   4   54.70    2.15
  -1   5   4   51.76    2.14
  -1   5   4   53.04    2.16
   0  -5  -4   22.56    0.99
   0  -5  -4   21.03    1.04
   0  -5  -4   22.74    1.06
   0  -5  -4   24.08    1.07
   0   5   4   23.41    0.99
   0   5   4   23.41    1.05
   0   5   4   23.87    1.08
  -1  -5  -4    0.17    0.12
  -1  -5  -4    0.01    0.11
  -1  -5  -4    0.23    0.08
  -1  -5  -4    0.20    0.13
   1   5   4    0.14    0.15
   1   5   4    0.15    0.03
   1   5   4    0.19    0.13
  -2  -5  -4   12.18    0.66
  -2  -5  -4   11.08    0.42
  -2  -5  -4   10.02    0.64
  -2  -5  -4   11.43    0.66
   2   5   4   10.84    0.63
   2   5   4   11.28    0.64
  -3  -5  -4   80.30    3.19
  -3  -5  -4   85.47    2.85
  -3  -5  -4   77.69    3.27
   3   5   4   80.89    3.26
   3   5   4   78.68    3.15
  -4  -5  -4   15.26    0.65
  -4  -5  -4   13.43    0.85
  -4  -5  -4   15.57    0.84
   4   5   4   13.35    0.82
   4   5   4   13.35    0.79
  -5  -5  -4    1.41    0.33
  -5  -5  -4    1.19    0.24
  -5  -5  -4    1.25    0.27
  -5  -5  -4    1.50    0.23
   5   5   4    1.61    0.32
  -6  -5  -4   -0.18    0.13
  -6  -5  -4    0.24    0.22
  -6  -5  -4   -0.03    0.16
   6   5   4   -0.08    0.19
   6   5   4   -0.07    0.22
  -7  -5  -4    6.95    0.68
  -7  -5  -4    6.90    0.66
  -7  -5  -4    6.77    0.77
   7   5   4    7.53    0.74
   7   5   4    6.91    0.72
  -8  -5  -4    0.12    0.22
  -8  -5  -4    0.01    0.20
  -8  -5  -4    0.31    0.27
   8   5   4    0.09    0.24
   8   5   4    0.13    0.26
  -9  -5  -4   -0.19    0.21
  -9  -5  -4    0.97    0.30
  -9  -5  -4    0.50    0.34
   9   5   4    0.39    0.32
   9   5   4    0.94    0.39
 -10  -5  -4   -0.02    0.25
 -10  -5  -4    0.20    0.35
  10   5   4    0.51    0.34
  10   5   4    0.14    0.30
   8  -6  -4    0.07    0.21
   8  -6  -4    0.07    0.33
  -8   6   4   -0.32    0.31
  -8   6   4    0.38    0.33
   7  -6  -4    0.94    0.28
   7  -6  -4    0.95    0.38
  -7   6   4    1.00    0.34
  -7   6   4    1.06    0.39
   6  -6  -4    0.19    0.28
   6  -6  -4    0.25    0.21
  -6   6   4   -0.05    0.25
  -6   6   4    0.54    0.33
   5  -6  -4   12.29    0.74
   5  -6  -4   13.21    0.63
  -5   6   4   12.70    0.90
  -5   6   4   12.25    0.73
  -5   6   4   12.01    0.87
   4  -6  -4   13.95    0.79
   4  -6  -4   14.82    0.73
   4  -6  -4   16.40    0.84
  -4   6   4   15.25    0.92
  -4   6   4   14.84    0.94
  -4   6   4   14.67    0.79
   3  -6  -4    1.01    0.21
   3  -6  -4    1.02    0.20
   3  -6  -4    0.76    0.19
  -3   6   4    0.94    0.19
  -3   6   4    1.23    0.28
  -3   6   4    1.06    0.25
   2  -6  -4   10.85    0.63
   2  -6  -4   11.68    0.65
   2  -6  -4   12.32    0.70
   2  -6  -4   12.47    0.66
  -2   6   4   11.91    0.64
  -2   6   4   11.72    0.67
  -2   6   4   10.48    0.69
   1  -6  -4    5.49    0.39
   1  -6  -4    5.19    0.42
   1  -6  -4    4.58    0.38
   1  -6  -4    5.24    0.36
  -1   6   4    4.33    0.34
  -1   6   4    4.83    0.47
  -1   6   4    4.83    0.37
   0  -6  -4   91.03    3.40
   0  -6  -4   85.08    3.35
   0  -6  -4   86.55    3.32
   0  -6  -4   84.79    3.39
   0   6   4   83.66    2.99
   0   6   4   88.11    3.31
   0   6   4   83.38    3.36
   0   6   4   87.29    3.38
  -1  -6  -4    0.08    0.07
  -1  -6  -4    0.01    0.12
  -1  -6  -4    0.12    0.13
  -1  -6  -4    0.11    0.13
   1   6   4    0.10    0.12
   1   6   4   -0.06    0.13
  -2  -6  -4   17.57    0.94
  -2  -6  -4   18.33    0.74
  -2  -6  -4   18.07    0.92
  -2  -6  -4   16.64    0.93
   2   6   4   18.38    0.94
   2   6   4   17.43    0.90
  -3  -6  -4    4.00    0.45
  -3  -6  -4    4.36    0.48
  -3  -6  -4    4.09    0.20
   3   6   4    3.49    0.42
   3   6   4    4.48    0.43
  -4  -6  -4    0.18    0.15
  -4  -6  -4    0.14    0.17
  -4  -6  -4    0.26    0.12
  -4  -6  -4    0.24    0.09
   4   6   4    0.55    0.21
   4   6   4    0.27    0.20
  -5  -6  -4    2.00    0.29
  -5  -6  -4    2.78    0.29
  -5  -6  -4    2.63    0.40
  -5  -6  -4    2.71    0.45
   5   6   4    2.42    0.40
  -6  -6  -4    0.27    0.25
  -6  -6  -4    0.32    0.22
  -6  -6  -4    0.57    0.21
   6   6   4    0.79    0.27
  -7  -6  -4    0.32    0.20
  -7  -6  -4    0.22    0.23
  -7  -6  -4   -0.09    0.28
   7   6   4    0.21    0.27
   7   6   4    0.11    0.21
  -8  -6  -4    0.58    0.28
  -8  -6  -4    0.29    0.30
  -8  -6  -4    0.19    0.24
   8   6   4    0.34    0.32
   8   6   4   -0.43    0.23
  -9  -6  -4    0.47    0.31
  -9  -6  -4    1.18    0.43
  -9  -6  -4    0.60    0.29
   9   6   4    0.22    0.31
   9   6   4    0.29    0.28
 -10  -6  -4    0.36    0.35
 -10  -6  -4    0.02    0.28
 -10  -6  -4   -0.22    0.24
  10   6   4   -0.42    0.28
  10   6   4    0.05    0.32
   8  -7  -4    0.82    0.29
   8  -7  -4    1.01    0.45
  -8   7   4    0.99    0.44
  -8   7   4    1.01    0.45
   7  -7  -4    0.06    0.18
  -7   7   4   -0.17    0.28
  -7   7   4   -0.37    0.23
   6  -7  -4    1.90    0.32
  -6   7   4    1.31    0.41
  -6   7   4    1.02    0.37
   5  -7  -4    0.84    0.20
   5  -7  -4    0.74    0.22
  -5   7   4    1.09    0.36
  -5   7   4    0.42    0.28
   4  -7  -4    1.86    0.28
   4  -7  -4    1.89    0.29
   4  -7  -4    2.56    0.34
  -4   7   4    1.35    0.36
  -4   7   4    2.50    0.40
  -4   7   4    1.92    0.28
   3  -7  -4    3.42    0.37
   3  -7  -4    4.43    0.43
   3  -7  -4    3.80    0.40
  -3   7   4    3.71    0.47
  -3   7   4    4.07    0.45
  -3   7   4    3.47    0.36
   2  -7  -4    2.31    0.32
   2  -7  -4    1.76    0.27
   2  -7  -4    1.76    0.27
  -2   7   4    2.46    0.29
  -2   7   4    2.36    0.31
  -2   7   4    2.19    0.25
  -2   7   4    1.97    0.35
   1  -7  -4    0.23    0.13
   1  -7  -4    0.16    0.13
   1  -7  -4    0.11    0.15
   1  -7  -4    0.27    0.14
  -1   7   4    0.32    0.19
  -1   7   4    0.15    0.12
  -1   7   4    0.12    0.14
  -1   7   4    0.13    0.09
   0  -7  -4    0.37    0.16
   0  -7  -4    0.48    0.17
   0  -7  -4    0.27    0.17
   0  -7  -4    0.35    0.10
   0   7   4    0.36    0.05
   0   7   4    0.48    0.16
   0   7   4    0.35    0.11
   0   7   4    0.64    0.21
  -1  -7  -4    0.35    0.07
  -1  -7  -4    0.44    0.19
  -1  -7  -4    0.26    0.17
  -1  -7  -4    0.25    0.17
   1   7   4    0.39    0.17
   1   7   4    0.18    0.18
  -2  -7  -4    3.04    0.15
  -2  -7  -4    3.32    0.41
  -2  -7  -4    2.88    0.38
  -2  -7  -4    2.95    0.40
   2   7   4    2.81    0.37
   2   7   4    2.82    0.37
  -3  -7  -4    2.08    0.15
  -3  -7  -4    1.83    0.34
  -3  -7  -4    1.89    0.34
  -3  -7  -4    1.47    0.15
   3   7   4    1.73    0.30
   3   7   4    2.18    0.34
  -4  -7  -4    2.24    0.23
  -4  -7  -4    1.54    0.31
  -4  -7  -4    2.15    0.19
  -4  -7  -4    2.38    0.41
   4   7   4    1.81    0.33
   4   7   4    1.93    0.36
  -5  -7  -4    0.55    0.27
  -5  -7  -4    0.75    0.18
  -5  -7  -4    0.46    0.25
  -5  -7  -4    0.98    0.18
   5   7   4    0.41    0.26
   5   7   4    0.44    0.24
  -6  -7  -4   12.51    0.75
  -6  -7  -4   13.17    0.96
  -6  -7  -4   12.51    0.87
   6   7   4   12.05    0.90
  -7  -7  -4    0.05    0.17
  -7  -7  -4    0.14    0.21
  -7  -7  -4    0.59    0.32
   7   7   4   -0.04    0.25
   7   7   4    0.60    0.32
  -8  -7  -4    0.32    0.26
  -8  -7  -4    1.18    0.42
  -8  -7  -4    1.13    0.35
   8   7   4    0.48    0.34
   8   7   4    1.18    0.40
  -9  -7  -4    0.87    0.33
  -9  -7  -4    0.62    0.32
   9   7   4    0.35    0.37
   9   7   4    1.10    0.42
 -10  -7  -4    3.23    0.56
 -10  -7  -4    3.06    0.68
 -10  -7  -4    2.83    0.57
  10   7   4    3.50    0.70
   7  -8  -4    0.14    0.19
  -7   8   4   -0.25    0.25
  -7   8   4    0.10    0.37
   6  -8  -4    0.39    0.19
  -6   8   4    0.45    0.31
  -6   8   4    0.76    0.36
   5  -8  -4    1.50    0.27
   5  -8  -4    1.13    0.25
  -5   8   4    1.97    0.42
  -5   8   4    1.46    0.40
   4  -8  -4    2.64    0.34
   4  -8  -4    2.61    0.36
  -4   8   4    2.67    0.48
  -4   8   4    3.48    0.47
   3  -8  -4    1.10    0.25
   3  -8  -4    1.21    0.26
   3  -8  -4    1.47    0.26
  -3   8   4    1.80    0.35
  -3   8   4    0.96    0.26
  -3   8   4    1.35    0.25
   2  -8  -4    9.30    0.56
   2  -8  -4    8.85    0.62
   2  -8  -4    7.85    0.55
  -2   8   4    8.67    0.56
  -2   8   4    9.25    0.68
  -2   8   4    8.33    0.53
  -2   8   4    9.02    0.49
   1  -8  -4    5.81    0.43
   1  -8  -4    5.22    0.43
   1  -8  -4    4.85    0.52
  -1   8   4    5.10    0.29
  -1   8   4    5.03    0.46
  -1   8   4    4.64    0.52
  -1   8   4    4.62    0.35
   0  -8  -4    0.87    0.22
   0  -8  -4    1.09    0.24
   0  -8  -4    1.13    0.28
   0   8   4    1.33    0.29
   0   8   4    0.97    0.21
  -1  -8  -4    0.23    0.20
  -1  -8  -4    0.51    0.19
   1   8   4    0.29    0.19
   1   8   4    0.27    0.20
  -2  -8  -4   30.68    1.46
  -2  -8  -4   27.26    1.43
   2   8   4   29.10    1.41
   2   8   4   29.97    1.39
  -3  -8  -4    0.72    0.26
  -3  -8  -4    0.33    0.19
   3   8   4    0.16    0.21
   3   8   4    0.26    0.21
  -4  -8  -4    0.77    0.09
  -4  -8  -4    0.76    0.30
  -4  -8  -4    0.48    0.27
  -4  -8  -4    0.72    0.12
   4   8   4    0.36    0.23
   4   8   4    0.69    0.27
  -5  -8  -4   -0.10    0.20
  -5  -8  -4    0.24    0.12
  -5  -8  -4    0.08    0.24
   5   8   4   -0.20    0.17
   5   8   4   -0.03    0.22
  -6  -8  -4    1.62    0.39
  -6  -8  -4    1.48    0.26
  -6  -8  -4    1.60    0.41
   6   8   4    1.42    0.39
  -7  -8  -4    0.57    0.28
  -7  -8  -4    0.36    0.21
  -7  -8  -4    0.16    0.31
   7   8   4    0.14    0.28
   7   8   4    1.23    0.39
  -8  -8  -4    1.66    0.44
  -8  -8  -4    2.27    0.54
  -8  -8  -4    2.18    0.41
   8   8   4    1.44    0.48
   8   8   4    1.88    0.51
  -9  -8  -4    3.25    0.68
  -9  -8  -4    2.26    0.52
  -9  -8  -4    2.45    0.50
   9   8   4    2.47    0.57
   9   8   4    2.99    0.62
   7  -9  -4    0.22    0.20
  -7   9   4   -0.46    0.25
  -7   9   4    0.05    0.37
   6  -9  -4    0.01    0.16
  -6   9   4    0.35    0.29
  -6   9   4    0.33    0.31
   5  -9  -4    0.05    0.15
   5  -9  -4    0.01    0.16
  -5   9   4    0.18    0.28
  -5   9   4    0.48    0.32
   4  -9  -4    1.31    0.25
  -4   9   4    1.56    0.41
  -4   9   4    1.49    0.36
   3  -9  -4    2.98    0.36
   3  -9  -4    3.05    0.44
  -3   9   4    2.49    0.38
  -3   9   4    3.48    0.52
   2  -9  -4    2.92    0.36
   2  -9  -4    2.27    0.38
  -2   9   4    3.27    0.48
  -2   9   4    3.01    0.35
  -2   9   4    3.61    0.38
   1  -9  -4   10.41    0.75
   1  -9  -4    9.79    0.66
   1  -9  -4   12.38    0.69
  -1   9   4   12.20    0.80
  -1   9   4   10.99    0.50
  -1   9   4   10.61    0.57
  -1   9   4   11.16    0.67
   0  -9  -4    4.47    0.54
   0  -9  -4    5.25    0.54
   0  -9  -4    5.83    0.48
   0   9   4    6.00    0.48
   0   9   4    5.07    0.55
  -1  -9  -4    3.09    0.46
  -1  -9  -4    2.64    0.40
  -1  -9  -4    3.52    0.43
   1   9   4    2.87    0.43
   1   9   4    3.02    0.40
  -2  -9  -4   32.10    1.61
  -2  -9  -4   31.51    1.64
   2   9   4   34.71    1.62
   2   9   4   34.22    1.56
  -3  -9  -4    7.31    0.75
  -3  -9  -4    9.67    0.74
   3   9   4    8.90    0.67
   3   9   4    8.21    0.67
  -4  -9  -4    1.86    0.40
  -4  -9  -4    2.34    0.45
   4   9   4    1.60    0.35
   4   9   4    1.79    0.39
  -5  -9  -4    1.39    0.42
  -5  -9  -4    1.98    0.44
   5   9   4    1.95    0.44
   5   9   4    1.15    0.34
  -6  -9  -4    0.86    0.40
  -6  -9  -4    1.23    0.39
   6   9   4    1.14    0.39
  -7  -9  -4   -0.20    0.25
  -7  -9  -4   -0.12    0.24
   7   9   4   -0.17    0.26
  -8  -9  -4    0.66    0.42
  -8  -9  -4    0.62    0.36
   8   9   4    0.16    0.34
   8   9   4    0.82    0.39
  -9  -9  -4   -0.17    0.29
  -9  -9  -4    0.48    0.38
   9   9   4   -0.03    0.33
   9   9   4   -0.38    0.32
   6 -10  -4    0.10    0.15
  -6  10   4    0.19    0.31
  -6  10   4    0.23    0.37
   5 -10  -4    0.00    0.15
   5 -10  -4    0.23    0.21
  -5  10   4   -0.14    0.25
  -5  10   4    0.09    0.28
   4 -10  -4    0.78    0.21
   4 -10  -4    1.53    0.35
  -4  10   4    1.03    0.38
  -4  10   4    0.68    0.29
   3 -10  -4    0.29    0.22
   3 -10  -4    0.10    0.17
  -3  10   4    0.03    0.25
  -3  10   4   -0.07    0.19
   2 -10  -4    6.01    0.67
   2 -10  -4    7.88    0.54
  -2  10   4    6.29    0.69
  -2  10   4    7.36    0.50
   1 -10  -4    0.84    0.29
   1 -10  -4    0.76    0.23
  -1  10   4    0.92    0.17
  -1  10   4    1.38    0.36
   0 -10  -4    1.14    0.30
   0 -10  -4    2.53    0.43
   0  10   4    1.81    0.32
   0  10   4    2.79    0.44
  -1 -10  -4   10.82    0.80
  -1 -10  -4    8.79    0.69
   1  10   4   11.40    0.75
   1  10   4    8.13    0.66
  -2 -10  -4    0.69    0.30
  -2 -10  -4    0.27    0.23
   2  10   4    0.71    0.27
   2  10   4    0.09    0.20
  -3 -10  -4   15.93    1.06
  -3 -10  -4   15.65    1.05
   3  10   4   17.05    1.03
   3  10   4   15.47    0.94
  -4 -10  -4    2.43    0.50
  -4 -10  -4    1.68    0.43
   4  10   4    1.79    0.42
   4  10   4    1.64    0.38
  -5 -10  -4   -0.01    0.18
  -5 -10  -4    0.18    0.28
   5  10   4    0.10    0.25
   5  10   4    0.08    0.26
  -6 -10  -4    1.29    0.42
  -6 -10  -4    1.85    0.49
   6  10   4    1.44    0.43
  -7 -10  -4    0.25    0.29
  -7 -10  -4    0.49    0.39
   7  10   4   -0.15    0.28
  -8 -10  -4    3.05    0.69
   8  10   4    2.78    0.60
   8  10   4    3.19    0.66
  -5  11   4    0.28    0.37
   4 -11  -4    0.89    0.30
   4 -11  -4    0.37    0.19
  -4  11   4    0.54    0.37
   3 -11  -4    2.31    0.44
   3 -11  -4    2.16    0.33
  -3  11   4    2.87    0.53
   2 -11  -4    3.24    0.40
   2 -11  -4    2.67    0.48
  -2  11   4    3.95    0.59
   1 -11  -4    0.08    0.19
   1 -11  -4   -0.07    0.18
  -1  11   4    0.76    0.33
   0 -11  -4    1.30    0.31
   0 -11  -4    1.71    0.40
   0  11   4    1.48    0.36
  -1 -11  -4    3.05    0.48
  -1 -11  -4    5.34    0.67
   1  11   4    3.65    0.51
  -2 -11  -4    9.00    0.90
  -2 -11  -4    9.16    0.85
   2  11   4    8.61    0.68
   2  11   4    8.58    0.70
  -3 -11  -4    0.98    0.36
  -3 -11  -4    1.00    0.35
   3  11   4    0.87    0.31
   3  11   4    1.60    0.37
  -4 -11  -4    0.29    0.27
  -4 -11  -4   -0.19    0.27
   4  11   4    0.36    0.29
   4  11   4   -0.07    0.22
  -5 -11  -4    8.96    0.98
  -5 -11  -4    7.67    0.86
   5  11   4    8.05    0.76
   5  11   4    9.29    0.92
  -6 -11  -4    0.71    0.38
  -6 -11  -4    1.88    0.55
   6  11   4    1.61    0.47
  -7 -11  -4    0.61    0.42
  -7 -11  -4    0.33    0.34
   7  11   4    0.04    0.33
   4 -12  -4   -0.16    0.20
  -4  12   4   -0.27    0.29
   3 -12  -4    0.41    0.28
   3 -12  -4    0.20    0.17
  -3  12   4    0.51    0.34
   2 -12  -4    0.96    0.35
   2 -12  -4    1.06    0.27
  -2  12   4    0.98    0.39
   1 -12  -4    0.39    0.22
   1 -12  -4    0.23    0.25
  -1  12   4   -0.15    0.28
   0 -12  -4   -0.20    0.22
   0 -12  -4    0.10    0.21
   0  12   4    0.06    0.26
  -1 -12  -4    0.16    0.25
  -1 -12  -4    0.17    0.23
   1  12   4    0.25    0.26
  -2 -12  -4    0.88    0.37
  -2 -12  -4    1.30    0.38
   2  12   4    1.03    0.35
  -3 -12  -4    2.30    0.48
  -3 -12  -4    2.50    0.51
   3  12   4    1.92    0.40
  -4 -12  -4    0.10    0.28
  -4 -12  -4   -0.36    0.22
   4  12   4    0.32    0.26
  -5 -12  -4    0.67    0.38
  -5 -12  -4    0.10    0.30
   5  12   4    0.07    0.29
   5  12   4    0.77    0.33
  -6 -12  -4   -0.32    0.27
  -6 -12  -4   -0.43    0.27
   6  12   4   -0.05    0.33
   2 -13  -4    0.01    0.19
   2 -13  -4    0.22    0.27
  -2  13   4   -0.10    0.29
   1 -13  -4    0.46    0.31
   1 -13  -4    0.68    0.28
  -1  13   4    1.51    0.44
   0 -13  -4    2.38    0.54
   0 -13  -4    1.99    0.40
   0  13   4    2.61    0.50
  -1 -13  -4    0.37    0.31
  -1 -13  -4    0.60    0.30
   1  13   4    0.52    0.33
  -2 -13  -4    1.11    0.39
  -2 -13  -4    1.16    0.37
   2  13   4    0.73    0.34
  -3 -13  -4    0.19    0.34
  -3 -13  -4    0.74    0.38
   3  13   4    0.51    0.30
  -4 -13  -4    1.07    0.45
  -4 -13  -4    1.07    0.41
   4  13   4    1.21    0.39
  -1 -14  -4    1.08    0.43
   3  11  -5    0.81    0.41
  -3 -11   5    0.19    0.36
  -3 -11   5    0.15    0.22
  -3 -11   5    0.39    0.34
   2  11  -5    3.86    0.69
  -2 -11   5    2.09    0.48
  -2 -11   5    3.83    0.69
  -2 -11   5    3.82    0.50
   1  11  -5    1.34    0.44
  -1 -11   5    1.59    0.37
  -1 -11   5    1.26    0.48
  -1 -11   5    1.45    0.35
   0  11  -5    1.15    0.45
   0 -11   5    0.73    0.44
   0 -11   5    0.96    0.29
   0 -11   5    0.19    0.23
  -1  11  -5    3.88    0.68
   1 -11   5    2.56    0.44
   1 -11   5    4.83    0.77
   1 -11   5    3.33    0.39
  -2  11  -5    2.39    0.58
   2 -11   5    2.85    0.49
  -3  11  -5    0.17    0.34
   3 -11   5    0.33    0.30
   4  10  -5    5.02    0.76
  -4 -10   5    4.15    0.57
  -4 -10   5    5.48    0.75
  -4 -10   5    5.02    0.75
   3  10  -5    0.36    0.35
  -3 -10   5   -0.09    0.20
  -3 -10   5   -0.15    0.29
  -3 -10   5   -0.29    0.19
   2  10  -5   -0.01    0.29
  -2 -10   5   -0.19    0.21
  -2 -10   5    0.13    0.20
  -2 -10   5    0.13    0.26
   1  10  -5    2.95    0.57
  -1 -10   5    2.48    0.57
  -1 -10   5    2.56    0.42
  -1 -10   5    3.76    0.51
   0  10  -5    0.06    0.29
   0 -10   5    0.23    0.28
   0 -10   5    0.05    0.20
   0 -10   5    0.19    0.21
  -1  10  -5    0.16    0.33
   1 -10   5   -0.03    0.19
   1 -10   5    0.13    0.17
   1 -10   5    0.66    0.39
  -2  10  -5    0.27    0.32
   2 -10   5    0.12    0.21
   2 -10   5    0.33    0.13
   2 -10   5    0.32    0.32
  -3  10  -5    3.77    0.65
   3 -10   5    2.48    0.46
  -4  10  -5    1.76    0.49
   4 -10   5    1.28    0.37
  -5  10  -5   -0.30    0.27
  -5  10  -5   -0.30    0.27
   5 -10   5    0.18    0.28
   5   9  -5   -0.20    0.27
   5   9  -5    0.09    0.31
  -5  -9   5    0.10    0.26
  -5  -9   5    0.36    0.37
  -5  -9   5   -0.13    0.26
   4   9  -5    0.17    0.30
   4   9  -5    0.95    0.40
  -4  -9   5    0.53    0.31
  -4  -9   5    1.03    0.38
  -4  -9   5    0.14    0.26
   3   9  -5    1.45    0.43
  -3  -9   5    1.00    0.35
  -3  -9   5    1.24    0.42
  -3  -9   5    0.20    0.22
   2   9  -5    1.34    0.40
  -2  -9   5    0.96    0.32
  -2  -9   5    1.30    0.30
  -2  -9   5    1.35    0.42
   1   9  -5    0.22    0.28
  -1  -9   5    0.72    0.28
  -1  -9   5    0.78    0.25
  -1  -9   5    1.35    0.41
   0   9  -5   -0.11    0.23
   0  -9   5    0.18    0.21
   0  -9   5    0.44    0.33
   0  -9   5   -0.02    0.17
  -1   9  -5    0.44    0.32
   1  -9   5    0.90    0.37
   1  -9   5    0.90    0.28
   1  -9   5    0.41    0.19
  -2   9  -5    0.29    0.29
   2  -9   5   -0.06    0.10
   2  -9   5   -0.16    0.19
   2  -9   5    0.46    0.23
  -3   9  -5    2.08    0.47
   3  -9   5    1.98    0.39
  -4   9  -5    0.64    0.34
  -4   9  -5    0.33    0.21
   4  -9   5    0.14    0.23
  -5   9  -5    0.99    0.29
  -5   9  -5    0.37    0.30
   5  -9   5    0.69    0.32
  -6   9  -5    0.80    0.35
  -6   9  -5    0.20    0.28
  -6   9  -5    0.25    0.34
   6   8  -5    2.49    0.51
   6   8  -5    1.96    0.51
  -6  -8   5    2.28    0.57
  -6  -8   5    1.95    0.43
  -6  -8   5    2.54    0.51
  -6  -8   5    2.51    0.49
   5   8  -5    2.18    0.49
   5   8  -5    1.52    0.44
  -5  -8   5    0.82    0.35
  -5  -8   5    1.87    0.47
  -5  -8   5    1.68    0.39
   4   8  -5    1.94    0.44
   4   8  -5    1.38    0.40
  -4  -8   5    1.72    0.43
  -4  -8   5    1.78    0.42
  -4  -8   5    0.55    0.27
   3   8  -5    0.17    0.24
   3   8  -5    0.15    0.25
  -3  -8   5    0.31    0.27
  -3  -8   5    0.28    0.29
  -3  -8   5    0.38    0.26
   2   8  -5    3.05    0.52
   2   8  -5    1.73    0.37
  -2  -8   5    3.20    0.53
  -2  -8   5    2.71    0.44
  -2  -8   5    1.82    0.35
   1   8  -5    0.30    0.28
   1   8  -5    0.11    0.18
  -1  -8   5    0.06    0.21
  -1  -8   5   -0.12    0.16
  -1  -8   5   -0.27    0.19
   0   8  -5    7.61    0.80
   0  -8   5   10.84    0.83
   0  -8   5    7.85    0.59
   0  -8   5    8.15    0.62
  -1   8  -5    0.05    0.22
   1  -8   5    0.01    0.18
   1  -8   5   -0.15    0.23
   1  -8   5    0.00    0.13
  -2   8  -5    9.63    0.50
  -2   8  -5    9.20    0.88
   2  -8   5    9.30    0.51
   2  -8   5    8.50    0.65
  -3   8  -5    1.05    0.34
  -3   8  -5    0.86    0.21
   3  -8   5    0.74    0.28
  -4   8  -5    0.27    0.19
  -4   8  -5    0.12    0.24
   4  -8   5   -0.14    0.18
  -5   8  -5    1.72    0.40
  -5   8  -5    1.80    0.35
   5  -8   5    1.46    0.38
  -6   8  -5   -0.08    0.25
  -6   8  -5    0.08    0.25
   6  -8   5   -0.34    0.21
  -7   8  -5    0.32    0.33
  -7   8  -5    0.08    0.25
   7  -8   5    0.52    0.31
   7   7  -5    2.92    0.53
   7   7  -5    3.19    0.61
  -7  -7   5    3.02    0.65
  -7  -7   5    2.98    0.58
   6   7  -5   -0.08    0.27
   6   7  -5    0.12    0.26
  -6  -7   5    0.08    0.28
  -6  -7   5    0.16    0.29
  -6  -7   5   -0.01    0.25
  -6  -7   5   -0.01    0.31
   5   7  -5    0.70    0.31
   5   7  -5   -0.19    0.21
  -5  -7   5    0.44    0.27
  -5  -7   5    0.77    0.34
  -5  -7   5    0.00    0.23
  -5  -7   5    0.39    0.26
   4   7  -5    0.31    0.15
   4   7  -5    0.20    0.24
   4   7  -5    0.10    0.25
  -4  -7   5    0.57    0.26
  -4  -7   5    0.62    0.30
  -4  -7   5    0.52    0.31
   3   7  -5    1.67    0.22
   3   7  -5    1.43    0.37
   3   7  -5    2.00    0.38
  -3  -7   5    1.65    0.38
  -3  -7   5    1.83    0.36
  -3  -7   5    1.49    0.39
   2   7  -5    0.01    0.17
   2   7  -5    0.12    0.22
   2   7  -5   -0.04    0.10
  -2  -7   5    0.20    0.25
  -2  -7   5    0.09    0.18
  -2  -7   5    0.30    0.23
   1   7  -5   10.46    0.49
   1   7  -5   10.63    0.82
   1   7  -5    9.83    0.67
  -1  -7   5   10.47    0.67
  -1  -7   5   11.41    0.73
  -1  -7   5    8.39    0.82
  -1  -7   5    9.66    0.70
   0   7  -5    1.14    0.17
   0   7  -5    1.52    0.26
   0   7  -5    0.85    0.32
   0  -7   5    0.69    0.21
   0  -7   5    1.07    0.34
   0  -7   5    1.09    0.27
   0  -7   5    1.03    0.26
  -1   7  -5    3.61    0.32
  -1   7  -5    3.39    0.17
  -1   7  -5    3.62    0.34
  -1   7  -5    3.78    0.53
  -1   7  -5    3.20    0.17
   1  -7   5    3.99    0.46
   1  -7   5    3.42    0.37
   1  -7   5    3.74    0.37
   1  -7   5    2.22    0.46
  -2   7  -5   11.04    0.53
  -2   7  -5   10.14    0.51
  -2   7  -5   10.30    0.79
   2  -7   5    9.20    0.54
   2  -7   5   10.05    0.54
   2  -7   5   10.20    0.68
  -3   7  -5    0.24    0.15
  -3   7  -5    0.43    0.26
   3  -7   5    0.49    0.11
   3  -7   5    0.59    0.11
   3  -7   5    0.10    0.18
  -4   7  -5    3.42    0.52
   4  -7   5    2.57    0.43
  -5   7  -5    2.29    0.43
   5  -7   5    2.51    0.46
   5  -7   5    3.36    0.45
  -6   7  -5    2.46    0.43
   6  -7   5    2.87    0.45
   6  -7   5    2.57    0.49
  -7   7  -5    1.61    0.47
  -7   7  -5    1.45    0.38
   7  -7   5    1.85    0.42
  -8   7  -5    0.20    0.37
   8  -7   5    0.08    0.30
   7   6  -5    1.55    0.40
   7   6  -5    0.80    0.39
  -7  -6   5    0.75    0.44
  -7  -6   5    1.38    0.44
   6   6  -5    2.04    0.45
   6   6  -5    1.61    0.37
   6   6  -5    1.89    0.33
  -6  -6   5    1.32    0.35
  -6  -6   5    1.31    0.39
  -6  -6   5    1.09    0.42
   5   6  -5    0.60    0.28
   5   6  -5    0.83    0.33
   5   6  -5    0.45    0.19
  -5  -6   5    0.72    0.28
  -5  -6   5    0.50    0.26
  -5  -6   5    0.64    0.33
   4   6  -5    0.08    0.22
   4   6  -5    0.26    0.14
   4   6  -5    0.13    0.22
  -4  -6   5    0.09    0.25
  -4  -6   5    0.63    0.28
  -4  -6   5   -0.01    0.20
  -4  -6   5    0.23    0.22
   3   6  -5   17.70    1.05
   3   6  -5   16.80    1.01
   3   6  -5   16.73    0.76
  -3  -6   5   19.14    1.06
  -3  -6   5   15.03    0.91
  -3  -6   5   17.23    1.06
   2   6  -5    1.22    0.29
   2   6  -5    1.98    0.40
   2   6  -5    1.78    0.18
  -2  -6   5    2.05    0.34
  -2  -6   5    2.37    0.41
  -2  -6   5    2.21    0.40
   1   6  -5    5.76    0.29
   1   6  -5    5.49    0.62
   1   6  -5    5.79    0.53
  -1  -6   5    5.54    0.52
  -1  -6   5    6.45    0.53
  -1  -6   5    5.21    0.53
  -1  -6   5    5.39    0.60
   0   6  -5   -0.04    0.06
   0   6  -5    0.24    0.21
   0   6  -5    0.01    0.12
   0  -6   5    0.03    0.15
   0  -6   5    0.01    0.14
   0  -6   5    0.06    0.20
   0  -6   5    0.03    0.12
  -1   6  -5    5.53    0.25
  -1   6  -5    5.27    0.38
  -1   6  -5    5.11    0.25
  -1   6  -5    4.62    0.56
   1  -6   5    5.54    0.51
   1  -6   5    5.95    0.41
   1  -6   5    5.69    0.41
   1  -6   5    5.54    0.62
  -2   6  -5    2.24    0.26
  -2   6  -5    1.68    0.35
  -2   6  -5    2.20    0.23
  -2   6  -5    2.07    0.22
   2  -6   5    1.82    0.23
   2  -6   5    2.36    0.36
  -3   6  -5    0.15    0.06
  -3   6  -5    0.28    0.21
   3  -6   5    0.24    0.10
   3  -6   5   -0.06    0.12
   3  -6   5    0.16    0.09
  -4   6  -5    6.43    0.64
   4  -6   5    6.58    0.49
   4  -6   5    5.18    0.57
   4  -6   5    6.15    0.26
   4  -6   5    5.91    0.26
  -5   6  -5   -0.01    0.19
   5  -6   5    0.30    0.24
   5  -6   5    0.34    0.21
  -6   6  -5    0.14    0.20
   6  -6   5   -0.20    0.22
   6  -6   5   -0.22    0.21
  -7   6  -5    1.10    0.40
  -7   6  -5    0.99    0.30
   7  -6   5    0.92    0.32
  -8   6  -5    0.57    0.36
   8  -6   5    0.12    0.28
  -9   6  -5   -0.04    0.34
   9  -6   5    0.08    0.28
   8   5  -5    1.69    0.50
  -8  -5   5    1.04    0.43
  -8  -5   5    1.51    0.51
   7   5  -5    3.66    0.49
   7   5  -5    3.34    0.61
   7   5  -5    3.07    0.46
  -7  -5   5    2.61    0.55
  -7  -5   5    3.67    0.67
   6   5  -5   18.01    1.19
   6   5  -5   17.52    0.94
   6   5  -5   17.19    1.02
  -6  -5   5   17.15    0.90
  -6  -5   5   17.99    1.00
  -6  -5   5   17.03    1.22
  -6  -5   5   17.28    1.15
   5   5  -5    5.44    0.67
   5   5  -5    5.98    0.45
  -5  -5   5    6.23    0.60
  -5  -5   5    5.26    0.69
  -5  -5   5    5.41    0.40
  -5  -5   5    5.15    0.60
   4   5  -5   21.40    0.98
   4   5  -5   21.48    1.18
   4   5  -5   22.20    1.24
  -4  -5   5   20.06    1.16
  -4  -5   5   22.21    1.16
  -4  -5   5   22.45    0.92
  -4  -5   5   22.75    1.29
   3   5  -5    4.66    0.30
   3   5  -5    4.09    0.50
   3   5  -5    5.38    0.56
  -3  -5   5    4.45    0.50
  -3  -5   5    4.30    0.54
  -3  -5   5    4.43    0.49
  -3  -5   5    4.06    0.48
  -3  -5   5    4.00    0.19
  -3  -5   5    4.49    0.19
   2   5  -5   15.66    0.64
   2   5  -5   15.75    0.93
   2   5  -5   15.08    0.89
  -2  -5   5   14.20    0.82
  -2  -5   5   16.24    0.92
  -2  -5   5   15.69    0.93
   1   5  -5    0.26    0.06
   1   5  -5    0.32    0.17
   1   5  -5    0.18    0.16
   1   5  -5    0.31    0.05
  -1  -5   5    0.13    0.16
  -1  -5   5    0.34    0.20
  -1  -5   5    0.09    0.16
  -1  -5   5    0.30    0.17
   0   5  -5    0.72    0.09
   0   5  -5    0.48    0.19
   0   5  -5    0.36    0.16
   0  -5   5    0.38    0.15
   0  -5   5    0.73    0.21
   0  -5   5    0.17    0.13
   0  -5   5    0.49    0.24
  -1   5  -5   15.91    0.63
  -1   5  -5   15.63    0.77
  -1   5  -5   15.97    0.92
  -1   5  -5   15.39    0.63
  -1   5  -5   15.82    0.68
   1  -5   5   15.89    0.83
   1  -5   5   15.47    0.79
   1  -5   5   16.14    0.79
  -2   5  -5    3.56    0.28
  -2   5  -5    4.24    0.29
  -2   5  -5    3.45    0.45
  -2   5  -5    4.24    0.31
   2  -5   5    4.41    0.45
   2  -5   5    4.68    0.32
  -3   5  -5    0.99    0.14
  -3   5  -5    1.15    0.28
   3  -5   5    1.13    0.21
   3  -5   5    0.93    0.15
   3  -5   5    0.69    0.23
   3  -5   5    0.98    0.16
  -4   5  -5    1.46    0.11
  -4   5  -5    1.87    0.36
   4  -5   5    1.81    0.34
   4  -5   5    2.24    0.19
   4  -5   5    1.90    0.18
   4  -5   5    1.26    0.25
  -5   5  -5    1.01    0.29
   5  -5   5    1.08    0.31
   5  -5   5    1.35    0.15
   5  -5   5    1.48    0.15
   5  -5   5    1.73    0.31
  -6   5  -5    1.30    0.31
   6  -5   5    1.47    0.36
   6  -5   5    1.31    0.34
   6  -5   5    1.57    0.16
   6  -5   5    1.17    0.15
  -7   5  -5    6.20    0.79
  -7   5  -5    6.93    0.64
   7  -5   5    7.93    0.75
   7  -5   5    6.70    0.38
  -8   5  -5    0.31    0.35
   8  -5   5    0.65    0.32
   8  -5   5    0.14    0.12
  -9   5  -5    0.73    0.44
   9  -5   5    0.11    0.29
   8   4  -5    5.07    0.61
   8   4  -5    6.22    0.82
  -8  -4   5    4.88    0.74
  -8  -4   5    6.74    0.87
   7   4  -5    0.66    0.34
   7   4  -5    1.29    0.30
   7   4  -5    0.87    0.27
  -7  -4   5    1.06    0.40
  -7  -4   5    0.56    0.35
   6   4  -5    0.04    0.18
   6   4  -5   -0.14    0.14
   6   4  -5   -0.10    0.21
  -6  -4   5    0.22    0.27
  -6  -4   5    0.34    0.18
  -6  -4   5    0.12    0.26
   5   4  -5   23.57    1.10
   5   4  -5   22.59    1.32
   5   4  -5   22.09    1.19
  -5  -4   5   23.52    1.32
  -5  -4   5   21.41    1.32
  -5  -4   5   24.79    1.10
  -5  -4   5   24.97    1.17
   4   4  -5    0.86    0.29
   4   4  -5    1.05    0.26
   4   4  -5    0.74    0.17
  -4  -4   5    0.91    0.31
  -4  -4   5    1.12    0.29
  -4  -4   5    0.71    0.16
  -4  -4   5    0.54    0.22
   3   4  -5    2.42    0.39
   3   4  -5    2.35    0.37
   3   4  -5    2.73    0.24
  -3  -4   5    2.68    0.36
  -3  -4   5    2.72    0.20
  -3  -4   5    1.92    0.37
  -3  -4   5    1.86    0.32
  -3  -4   5    2.58    0.38
   2   4  -5    8.88    0.63
   2   4  -5    9.74    0.41
   2   4  -5    9.27    0.65
  -2  -4   5    9.02    0.60
  -2  -4   5    9.80    0.63
  -2  -4   5    9.10    0.63
  -2  -4   5    9.73    0.67
   1   4  -5    0.73    0.19
   1   4  -5    0.80    0.23
  -1  -4   5    0.73    0.22
  -1  -4   5    1.09    0.23
  -1  -4   5    0.64    0.19
  -1  -4   5    0.60    0.19
   0   4  -5    0.97    0.27
   0   4  -5    2.02    0.27
   0  -4   5    2.08    0.30
   0  -4   5    2.26    0.29
   0  -4   5    1.46    0.26
  -1   4  -5    1.09    0.12
  -1   4  -5    1.14    0.19
  -1   4  -5    1.41    0.29
  -1   4  -5    1.34    0.14
   1  -4   5    1.16    0.19
   1  -4   5    0.99    0.22
   1  -4   5    1.09    0.19
  -2   4  -5    4.69    0.31
  -2   4  -5    4.58    0.30
  -2   4  -5    3.75    0.44
  -2   4  -5    5.04    0.31
   2  -4   5    4.40    0.31
   2  -4   5    4.44    0.43
   2  -4   5    4.55    0.29
   2  -4   5    4.00    0.31
  -3   4  -5   10.65    0.60
  -3   4  -5   11.27    0.53
  -3   4  -5   11.31    0.71
   3  -4   5   10.90    0.66
   3  -4   5   11.39    0.59
   3  -4   5   10.21    0.53
  -4   4  -5   18.00    0.80
  -4   4  -5   18.92    1.01
   4  -4   5   17.72    0.97
   4  -4   5   20.35    0.83
   4  -4   5   18.43    0.82
   4  -4   5   18.76    0.92
  -5   4  -5    0.89    0.25
  -5   4  -5    1.18    0.15
   5  -4   5    0.97    0.25
   5  -4   5    1.13    0.17
   5  -4   5    1.11    0.17
   5  -4   5    0.61    0.26
  -6   4  -5    9.73    0.66
   6  -4   5    9.31    0.51
   6  -4   5    9.24    0.69
   6  -4   5    9.93    0.53
   6  -4   5    8.33    0.67
  -7   4  -5   -0.03    0.16
  -7   4  -5    0.07    0.28
   7  -4   5    0.06    0.13
   7  -4   5    0.81    0.30
  -8   4  -5    0.12    0.18
  -8   4  -5    0.17    0.33
   8  -4   5   -0.07    0.13
   8  -4   5    0.15    0.24
  -9   4  -5    0.30    0.38
   9  -4   5    0.13    0.29
   9  -4   5    0.17    0.19
 -10   4  -5   -0.16    0.31
  10  -4   5    0.08    0.19
  -9  -3   5    1.02    0.34
  -9  -3   5    0.22    0.37
   8   3  -5    0.41    0.26
   8   3  -5    0.83    0.39
  -8  -3   5   -0.06    0.31
  -8  -3   5    0.45    0.36
   7   3  -5   -0.39    0.20
   7   3  -5   -0.02    0.17
   7   3  -5    0.19    0.22
  -7  -3   5   -0.12    0.24
  -7  -3   5    0.08    0.25
   6   3  -5   -0.14    0.15
   6   3  -5    0.08    0.17
   6   3  -5    0.23    0.24
  -6  -3   5    0.19    0.27
  -6  -3   5    0.05    0.15
  -6  -3   5   -0.11    0.23
   5   3  -5    1.56    0.29
   5   3  -5    1.64    0.27
   5   3  -5    1.56    0.37
  -5  -3   5    1.94    0.28
  -5  -3   5    1.55    0.39
  -5  -3   5    1.73    0.38
   4   3  -5    3.43    0.33
   4   3  -5    3.71    0.42
   4   3  -5    3.69    0.49
  -4  -3   5    3.59    0.47
  -4  -3   5    4.06    0.32
  -4  -3   5    2.63    0.46
   3   3  -5    2.65    0.39
   3   3  -5    3.45    0.25
   3   3  -5    3.26    0.39
  -3  -3   5    3.51    0.47
  -3  -3   5    3.18    0.25
  -3  -3   5    3.08    0.40
   2   3  -5   13.36    0.53
   2   3  -5   13.39    0.77
   2   3  -5   12.97    0.76
  -2  -3   5   12.30    0.75
  -2  -3   5   12.99    0.79
  -2  -3   5   12.33    0.71
  -2  -3   5   12.97    0.55
   1   3  -5   39.64    1.68
   1   3  -5   39.20    1.66
  -1  -3   5   37.48    1.57
  -1  -3   5   37.51    1.68
  -1  -3   5   38.60    1.67
  -1  -3   5   36.86    1.38
   0   3  -5   47.78    1.99
   0   3  -5   49.07    2.04
   0   3  -5   48.63    1.76
   0  -3   5   50.87    2.02
   0  -3   5   47.05    2.01
   0  -3   5   47.03    1.91
  -1   3  -5    5.50    0.37
  -1   3  -5    5.08    0.28
  -1   3  -5    5.57    0.44
   1  -3   5    5.16    0.45
   1  -3   5    5.72    0.37
   1  -3   5    5.79    0.39
  -2   3  -5    0.47    0.18
  -2   3  -5    0.19    0.10
  -2   3  -5    0.41    0.12
   2  -3   5    0.31    0.11
   2  -3   5    0.31    0.10
   2  -3   5    0.20    0.11
   2  -3   5    0.06    0.12
  -3   3  -5   15.63    0.74
  -3   3  -5   15.52    0.73
  -3   3  -5   13.75    0.80
  -3   3  -5   14.66    0.68
   3  -3   5   15.25    0.69
   3  -3   5   13.29    0.68
   3  -3   5   14.86    0.78
   3  -3   5   13.68    0.69
  -4   3  -5    0.39    0.12
  -4   3  -5    0.27    0.17
   4  -3   5    0.29    0.12
   4  -3   5    0.25    0.18
   4  -3   5    0.27    0.15
   4  -3   5   -0.01    0.05
  -5   3  -5   10.07    0.65
  -5   3  -5   10.49    0.55
   5  -3   5   11.12    0.67
   5  -3   5    9.65    0.54
   5  -3   5    9.51    0.66
  -6   3  -5    2.30    0.34
  -6   3  -5    3.04    0.31
   6  -3   5    3.19    0.46
   6  -3   5    2.69    0.31
   6  -3   5    2.08    0.37
  -7   3  -5    0.86    0.24
   7  -3   5    1.26    0.24
   7  -3   5    1.40    0.34
  -8   3  -5    0.04    0.15
  -8   3  -5    0.05    0.29
   8  -3   5    0.05    0.17
   8  -3   5    0.13    0.25
  -9   3  -5    0.79    0.43
   9  -3   5    1.33    0.39
   9  -3   5    0.81    0.26
 -10   3  -5    1.72    0.55
  10  -3   5    1.93    0.50
  10  -3   5    1.88    0.37
   9   2  -5    2.97    0.53
   9   2  -5    2.41    0.60
  -9  -2   5    2.10    0.46
  -9  -2   5    3.18    0.64
  -9  -2   5    2.83    0.64
   8   2  -5   -0.18    0.26
   8   2  -5    1.18    0.34
  -8  -2   5    0.59    0.37
  -8  -2   5    0.55    0.29
  -8  -2   5    0.32    0.32
   7   2  -5    6.33    0.49
   7   2  -5    7.19    0.80
   7   2  -5    7.89    0.71
  -7  -2   5    5.77    0.75
  -7  -2   5    8.72    0.66
  -7  -2   5    8.04    0.88
   6   2  -5   12.28    0.89
   6   2  -5   12.46    0.70
   6   2  -5   10.83    0.72
  -6  -2   5   11.00    0.87
  -6  -2   5   12.88    0.78
  -6  -2   5   12.02    0.92
   5   2  -5   -0.01    0.20
   5   2  -5    0.15    0.15
   5   2  -5    0.26    0.17
   5   2  -5    0.18    0.12
  -5  -2   5    0.09    0.16
  -5  -2   5    0.45    0.27
  -5  -2   5   -0.12    0.20
   4   2  -5    4.12    0.33
   4   2  -5    4.19    0.37
   4   2  -5    4.56    0.52
   4   2  -5    4.22    0.42
  -4  -2   5    4.18    0.39
  -4  -2   5    3.94    0.48
  -4  -2   5    4.52    0.36
  -4  -2   5    3.04    0.46
   3   2  -5    7.30    0.40
   3   2  -5    6.65    0.44
   3   2  -5    7.81    0.52
   3   2  -5    6.89    0.53
  -3  -2   5    7.42    0.41
  -3  -2   5    6.08    0.59
  -3  -2   5    7.01    0.54
  -3  -2   5    7.48    0.43
   2   2  -5    1.52    0.14
   2   2  -5    1.59    0.26
   2   2  -5    1.44    0.25
   2   2  -5    1.95    0.26
  -2  -2   5    1.49    0.17
  -2  -2   5    1.46    0.26
  -2  -2   5    1.51    0.27
   1   2  -5    8.35    0.54
   1   2  -5    8.49    0.53
   1   2  -5    8.52    0.52
  -1  -2   5    8.42    0.38
  -1  -2   5    7.83    0.50
  -1  -2   5    7.34    0.53
  -1  -2   5    7.76    0.53
  -1  -2   5    9.02    0.55
   0   2  -5    4.30    0.23
   0   2  -5    3.39    0.37
   0   2  -5    4.48    0.35
   0  -2   5    3.41    0.36
   0  -2   5    4.09    0.23
   0  -2   5    4.57    0.40
   0  -2   5    4.42    0.34
  -1   2  -5    2.70    0.20
  -1   2  -5    2.87    0.29
  -1   2  -5    2.22    0.31
   1  -2   5    2.69    0.30
   1  -2   5    2.51    0.15
   1  -2   5    2.82    0.29
   1  -2   5    2.43    0.28
  -2   2  -5   54.13    2.16
  -2   2  -5   56.00    2.10
  -2   2  -5   52.27    2.20
   2  -2   5   52.63    2.16
   2  -2   5   56.00    2.17
   2  -2   5   55.82    2.06
   2  -2   5   55.43    2.11
  -3   2  -5    9.16    0.50
  -3   2  -5    9.22    0.51
  -3   2  -5    9.21    0.53
  -3   2  -5    9.23    0.58
   3  -2   5   10.40    0.52
   3  -2   5    8.99    0.55
   3  -2   5    9.63    0.51
   3  -2   5    9.04    0.50
  -4   2  -5    0.25    0.13
  -4   2  -5    0.04    0.13
   4  -2   5    0.25    0.17
   4  -2   5    0.26    0.16
   4  -2   5    0.19    0.13
   4  -2   5    0.20    0.11
  -5   2  -5   21.08    0.97
  -5   2  -5   20.24    1.01
   5  -2   5   20.55    0.96
   5  -2   5   19.94    0.96
   5  -2   5   19.52    1.02
   5  -2   5   21.93    1.07
  -6   2  -5    2.10    0.31
  -6   2  -5    1.49    0.25
   6  -2   5    1.89    0.29
   6  -2   5    1.80    0.28
   6  -2   5    1.89    0.35
  -7   2  -5    2.45    0.32
  -7   2  -5    1.99    0.32
   7  -2   5    1.94    0.38
   7  -2   5    2.02    0.31
  -8   2  -5   -0.13    0.12
  -8   2  -5   -0.18    0.26
   8  -2   5   -0.08    0.21
   8  -2   5   -0.04    0.17
  -9   2  -5    0.22    0.33
   9  -2   5    0.28    0.22
   9  -2   5    0.22    0.28
 -10   2  -5   -0.06    0.31
  10  -2   5   -0.10    0.26
  10  -2   5   -0.13    0.20
   9   1  -5    0.43    0.34
   9   1  -5    0.18    0.33
  -9  -1   5    0.68    0.38
  -9  -1   5    0.23    0.26
  -9  -1   5    0.80    0.42
   8   1  -5   -0.10    0.21
   8   1  -5    0.03    0.27
  -8  -1   5   -0.22    0.25
  -8  -1   5   -0.12    0.26
  -8  -1   5    0.34    0.25
   7   1  -5   -0.10    0.20
   7   1  -5   -0.12    0.21
  -7  -1   5   -0.08    0.22
  -7  -1   5    0.44    0.30
  -7  -1   5    0.20    0.20
   6   1  -5    2.57    0.30
   6   1  -5    2.93    0.49
   6   1  -5    2.80    0.39
  -6  -1   5    3.36    0.45
  -6  -1   5    2.36    0.46
  -6  -1   5    2.22    0.44
   5   1  -5    1.95    0.27
   5   1  -5    1.87    0.37
   5   1  -5    2.05    0.21
   5   1  -5    1.62    0.29
  -5  -1   5    1.64    0.36
  -5  -1   5    2.26    0.41
  -5  -1   5    1.64    0.29
   4   1  -5    1.56    0.20
   4   1  -5    1.30    0.22
   4   1  -5    1.47    0.30
   4   1  -5    1.44    0.24
  -4  -1   5    1.51    0.31
  -4  -1   5    1.19    0.23
  -4  -1   5    1.34    0.32
   3   1  -5    7.11    0.43
   3   1  -5    7.32    0.48
   3   1  -5    6.95    0.54
   3   1  -5    7.75    0.43
  -3  -1   5    6.82    0.55
  -3  -1   5    7.94    0.58
  -3  -1   5    7.16    0.45
  -3  -1   5    7.90    0.44
   2   1  -5    0.08    0.09
   2   1  -5    0.15    0.07
   2   1  -5    0.11    0.11
   2   1  -5    0.27    0.15
  -2  -1   5    0.05    0.11
  -2  -1   5   -0.03    0.13
  -2  -1   5    0.15    0.08
  -2  -1   5   -0.14    0.11
  -2  -1   5    0.07    0.08
   1   1  -5   47.64    1.90
   1   1  -5   47.10    1.93
   1   1  -5   48.52    1.82
   1   1  -5   47.59    1.99
  -1  -1   5   47.14    2.00
  -1  -1   5   49.48    1.99
  -1  -1   5   47.51    1.82
  -1  -1   5   46.60    1.93
  -1  -1   5   47.04    2.01
  -1  -1   5   48.47    1.74
  -1  -1   5   45.37    1.86
   0   1  -5    0.82    0.19
   0   1  -5    0.81    0.12
   0   1  -5    0.77    0.19
   0   1  -5    1.13    0.22
   0   1  -5    0.45    0.15
   0  -1   5    0.82    0.12
   0  -1   5    0.98    0.19
   0  -1   5    0.82    0.07
   0  -1   5    0.91    0.17
   0  -1   5    0.92    0.19
  -1   1  -5   16.32    0.77
  -1   1  -5   15.47    0.74
  -1   1  -5   15.63    0.75
  -1   1  -5   16.40    0.69
  -1   1  -5   13.91    0.76
   1  -1   5   16.13    0.76
   1  -1   5   15.73    0.69
   1  -1   5   15.59    0.63
   1  -1   5   14.25    0.75
   1  -1   5   15.71    0.80
   1  -1   5   15.62    0.74
  -2   1  -5    0.71    0.15
  -2   1  -5    0.94    0.17
  -2   1  -5    0.90    0.20
   2  -1   5    0.61    0.15
   2  -1   5    0.85    0.16
   2  -1   5    0.84    0.16
   2  -1   5    0.88    0.14
  -3   1  -5   15.97    0.75
  -3   1  -5   14.84    0.72
  -3   1  -5   14.43    0.77
   3  -1   5   14.18    0.74
   3  -1   5   14.97    0.73
   3  -1   5   15.51    0.73
   3  -1   5   13.83    0.70
  -4   1  -5    0.14    0.12
  -4   1  -5    0.04    0.12
   4  -1   5   -0.07    0.14
   4  -1   5    0.20    0.12
   4  -1   5    0.05    0.11
   4  -1   5    0.18    0.13
  -5   1  -5    0.06    0.13
  -5   1  -5    0.18    0.14
   5  -1   5    0.04    0.13
   5  -1   5    0.05    0.15
   5  -1   5    0.25    0.15
   5  -1   5    0.22    0.18
  -6   1  -5    0.87    0.22
  -6   1  -5    1.21    0.23
   6  -1   5    1.10    0.28
   6  -1   5    1.08    0.24
   6  -1   5    1.03    0.23
  -7   1  -5    0.53    0.18
  -7   1  -5    0.48    0.23
   7  -1   5    0.33    0.21
   7  -1   5    0.18    0.23
   7  -1   5    0.78    0.24
  -8   1  -5    0.94    0.21
  -8   1  -5    1.22    0.42
  -8   1  -5    0.66    0.28
   8  -1   5    1.38    0.33
   8  -1   5    1.19    0.35
  -9   1  -5    0.82    0.41
   9  -1   5    1.33    0.40
   9  -1   5    1.36    0.36
 -10   1  -5    0.04    0.32
  10  -1   5   -0.04    0.28
  10  -1   5    0.14    0.25
   9   0  -5   -0.18    0.27
   9   0  -5   -0.33    0.29
  -9   0   5    0.01    0.24
  -9   0   5    0.39    0.37
  -9   0   5   -0.41    0.28
   8   0  -5    6.62    0.72
   8   0  -5    7.57    0.83
  -8   0   5    5.62    0.70
  -8   0   5    3.86    0.67
  -8   0   5    7.73    0.84
   7   0  -5    1.61    0.37
   7   0  -5    1.58    0.40
  -7   0   5    1.65    0.42
  -7   0   5    1.48    0.38
  -7   0   5    1.00    0.32
   6   0  -5    0.63    0.24
   6   0  -5    0.80    0.16
   6   0  -5    0.61    0.28
  -6   0   5    0.42    0.27
  -6   0   5    0.65    0.31
  -6   0   5    0.82    0.26
   5   0  -5    3.81    0.42
   5   0  -5    4.40    0.53
   5   0  -5    3.77    0.34
   5   0  -5    3.82    0.19
  -5   0   5    2.94    0.45
  -5   0   5    3.65    0.50
  -5   0   5    2.65    0.40
   4   0  -5    0.18    0.14
   4   0  -5    0.71    0.23
   4   0  -5    0.38    0.14
   4   0  -5    0.46    0.10
  -4   0   5    0.57    0.21
  -4   0   5    0.21    0.18
  -4   0   5    0.21    0.15
   3   0  -5    1.01    0.15
   3   0  -5    0.72    0.17
   3   0  -5    1.04    0.18
   3   0  -5    0.84    0.22
  -3   0   5    0.96    0.24
  -3   0   5    1.31    0.27
  -3   0   5    1.14    0.20
  -3   0   5    0.94    0.17
  -3   0   5    0.98    0.20
   2   0  -5    1.09    0.20
   2   0  -5    1.34    0.18
   2   0  -5    1.03    0.22
   2   0  -5    1.18    0.15
  -2   0   5    1.34    0.21
  -2   0   5    1.52    0.20
  -2   0   5    1.03    0.23
  -2   0   5    1.54    0.18
  -2   0   5    1.10    0.23
   1   0  -5  108.78    4.19
   1   0  -5  108.21    4.20
   1   0  -5  107.65    4.05
   1   0  -5  111.53    4.01
  -1   0   5  111.35    4.20
  -1   0   5  102.82    4.19
  -1   0   5  103.54    3.99
  -1   0   5  110.27    4.05
  -1   0   5  106.17    4.24
  -1   0   5  111.56    3.92
   0   0  -5  109.13    4.09
   0   0  -5  111.97    4.21
   0   0  -5  110.85    4.03
   0   0  -5  105.45    4.19
   0   0  -5  112.29    4.26
   0   0   5  106.26    4.20
   0   0   5  108.12    4.03
   0   0   5  111.24    4.09
   0   0   5  109.33    4.20
   0   0   5  108.75    3.93
  -1   0  -5  163.01    6.00
  -1   0  -5  155.48    5.85
  -1   0  -5  161.19    5.62
  -1   0  -5  157.69    5.99
  -1   0  -5  160.15    5.81
   1   0   5  155.53    5.99
   1   0   5  161.88    5.86
   1   0   5  169.20    6.01
   1   0   5  152.68    5.61
   1   0   5  156.11    5.80
  -2   0  -5   18.72    0.93
  -2   0  -5   20.08    0.92
  -2   0  -5   20.65    0.89
  -2   0  -5   19.23    0.88
  -2   0  -5   19.79    0.93
   2   0   5   20.71    0.93
   2   0   5   20.75    0.95
   2   0   5   19.10    0.87
   2   0   5   21.59    0.91
   2   0   5   20.37    0.86
   2   0   5   20.21    0.93
  -3   0  -5  122.86    4.63
  -3   0  -5  117.86    4.51
  -3   0  -5  123.15    4.53
   3   0   5  121.05    4.48
   3   0   5  122.77    4.62
   3   0   5  118.65    4.61
   3   0   5  125.46    4.53
   3   0   5  117.24    4.35
  -4   0  -5    1.93    0.27
  -4   0  -5    1.34    0.24
   4   0   5    1.85    0.28
   4   0   5    2.01    0.28
   4   0   5    1.88    0.28
   4   0   5    2.27    0.29
   4   0   5    1.77    0.26
  -5   0  -5   20.18    1.00
  -5   0  -5   19.20    0.95
   5   0   5   21.10    1.02
   5   0   5   20.43    1.00
   5   0   5   18.77    0.98
   5   0   5   19.06    0.97
  -6   0  -5    3.38    0.37
  -6   0  -5    3.59    0.44
   6   0   5    3.61    0.41
   6   0   5    4.47    0.45
   6   0   5    3.33    0.44
  -7   0  -5    0.23    0.15
  -7   0  -5   -0.01    0.23
  -7   0  -5   -0.01    0.18
   7   0   5    0.29    0.21
   7   0   5    0.24    0.19
   7   0   5    0.08    0.22
  -8   0  -5    0.13    0.25
  -8   0  -5    0.29    0.22
  -8   0  -5    0.35    0.16
   8   0   5    0.69    0.27
   8   0   5    0.30    0.26
  -9   0  -5    4.10    0.68
   9   0   5    4.01    0.60
   9   0   5    3.91    0.55
 -10   0  -5    1.56    0.47
  10   0   5    2.26    0.51
  10   0   5    1.51    0.38
   9  -1  -5   -0.01    0.26
   9  -1  -5    0.78    0.35
  -9   1   5   -0.23    0.28
  -9   1   5    0.55    0.35
   8  -1  -5    0.17    0.26
   8  -1  -5    0.13    0.25
  -8   1   5    0.89    0.41
  -8   1   5    0.70    0.35
  -8   1   5    0.65    0.32
   7  -1  -5    2.93    0.47
   7  -1  -5    4.33    0.59
  -7   1   5    4.13    0.59
  -7   1   5    2.90    0.49
  -7   1   5    3.64    0.57
   6  -1  -5   -0.09    0.18
   6  -1  -5    0.48    0.23
   6  -1  -5    0.14    0.09
  -6   1   5   -0.02    0.21
  -6   1   5    0.38    0.23
  -6   1   5    0.18    0.21
   5  -1  -5    1.48    0.20
   5  -1  -5    2.16    0.37
   5  -1  -5    2.06    0.34
  -5   1   5    0.94    0.26
  -5   1   5    1.37    0.32
  -5   1   5    1.87    0.37
   4  -1  -5   16.86    0.95
   4  -1  -5   18.17    0.80
   4  -1  -5   17.46    0.68
   4  -1  -5   17.03    0.86
  -4   1   5   18.24    0.99
  -4   1   5   16.06    0.78
  -4   1   5   16.21    0.90
  -4   1   5   16.16    0.98
   3  -1  -5  100.62    3.57
   3  -1  -5   96.65    3.64
   3  -1  -5   98.74    3.66
   3  -1  -5   97.47    3.87
  -3   1   5   99.97    3.67
  -3   1   5   96.30    3.73
  -3   1   5   89.46    3.91
  -3   1   5   97.72    3.64
  -3   1   5   98.72    3.89
   2  -1  -5   12.39    0.70
   2  -1  -5   10.38    0.65
   2  -1  -5   12.69    0.62
  -2   1   5   11.48    0.69
  -2   1   5   12.13    0.63
  -2   1   5   11.81    0.58
  -2   1   5   11.11    0.60
  -2   1   5   10.82    0.67
   1  -1  -5   -0.05    0.09
   1  -1  -5   -0.10    0.10
   1  -1  -5    0.14    0.12
   1  -1  -5    0.13    0.08
   1  -1  -5    0.06    0.10
  -1   1   5    0.10    0.12
  -1   1   5    0.15    0.11
  -1   1   5   -0.09    0.08
  -1   1   5    0.32    0.14
  -1   1   5    0.07    0.08
  -1   1   5   -0.04    0.07
   0  -1  -5   14.72    0.75
   0  -1  -5   15.63    0.70
   0  -1  -5   16.86    0.78
   0  -1  -5   13.77    0.72
   0  -1  -5   13.91    0.73
   0   1   5   14.16    0.74
   0   1   5   15.19    0.74
   0   1   5   13.70    0.68
   0   1   5   16.25    0.76
   0   1   5   13.93    0.67
  -1  -1  -5   30.19    1.28
  -1  -1  -5   30.04    1.29
  -1  -1  -5   30.86    1.23
  -1  -1  -5   28.72    1.28
  -1  -1  -5   30.31    1.18
  -1  -1  -5   29.78    1.30
   1   1   5   30.71    1.29
   1   1   5   28.23    1.28
   1   1   5   27.87    1.17
   1   1   5   29.98    1.29
   1   1   5   29.10    1.22
  -2  -1  -5   38.46    1.62
  -2  -1  -5   40.25    1.59
  -2  -1  -5   38.42    1.64
  -2  -1  -5   40.12    1.52
  -2  -1  -5   39.12    1.64
   2   1   5   41.75    1.66
   2   1   5   39.12    1.64
   2   1   5   39.85    1.63
   2   1   5   36.81    1.58
   2   1   5   37.88    1.50
  -3  -1  -5   17.18    0.88
  -3  -1  -5   19.69    0.84
  -3  -1  -5   18.73    0.91
   3   1   5   17.51    0.88
   3   1   5   18.30    0.86
   3   1   5   19.03    0.84
   3   1   5   17.91    0.90
   3   1   5   19.38    0.91
   3   1   5   19.69    0.90
  -4  -1  -5   53.51    2.21
  -4  -1  -5   55.79    2.29
   4   1   5   55.08    2.14
   4   1   5   54.13    2.28
   4   1   5   58.48    2.30
   4   1   5   53.09    2.22
   4   1   5   57.34    2.23
  -5  -1  -5    0.98    0.23
  -5  -1  -5    0.61    0.18
   5   1   5    0.76    0.22
   5   1   5    1.17    0.24
   5   1   5    0.55    0.22
   5   1   5    1.27    0.25
  -6  -1  -5   25.05    1.17
  -6  -1  -5   25.53    1.29
   6   1   5   25.14    1.26
   6   1   5   25.46    1.27
   6   1   5   26.37    1.28
  -7  -1  -5   18.18    1.13
  -7  -1  -5   16.59    0.89
  -7  -1  -5   19.78    1.08
   7   1   5   18.52    1.07
   7   1   5   18.75    1.05
  -8  -1  -5    1.54    0.25
  -8  -1  -5    1.32    0.34
  -8  -1  -5    1.83    0.47
   8   1   5    1.48    0.37
   8   1   5    1.44    0.35
  -9  -1  -5    0.11    0.24
  -9  -1  -5    0.18    0.27
   9   1   5   -0.08    0.23
   9   1   5    0.17    0.23
 -10  -1  -5    1.72    0.49
  10   1   5    2.00    0.47
  10   1   5    2.38    0.53
   9  -2  -5   -0.02    0.30
   9  -2  -5    0.18    0.29
  -9   2   5    0.07    0.37
  -9   2   5   -0.05    0.28
   8  -2  -5    0.66    0.32
   8  -2  -5    0.31    0.29
  -8   2   5    1.07    0.43
  -8   2   5    0.84    0.33
  -8   2   5    0.80    0.35
   7  -2  -5    7.26    0.74
   7  -2  -5    9.76    0.77
  -7   2   5    6.06    0.70
  -7   2   5    8.18    0.79
  -7   2   5    6.22    0.78
   6  -2  -5    0.09    0.20
   6  -2  -5   -0.24    0.15
  -6   2   5    0.46    0.29
  -6   2   5    0.43    0.25
  -6   2   5    0.30    0.23
   5  -2  -5    4.28    0.52
   5  -2  -5    5.11    0.53
   5  -2  -5    5.75    0.33
  -5   2   5    4.90    0.56
  -5   2   5    4.72    0.31
  -5   2   5    4.23    0.56
  -5   2   5    4.62    0.53
   4  -2  -5    1.61    0.20
   4  -2  -5    1.33    0.09
   4  -2  -5    1.47    0.09
   4  -2  -5    1.51    0.27
   4  -2  -5    1.50    0.29
  -4   2   5    1.27    0.28
  -4   2   5    1.17    0.19
  -4   2   5    1.43    0.29
  -4   2   5    1.19    0.30
   3  -2  -5   33.63    1.42
   3  -2  -5   35.04    1.48
   3  -2  -5   37.53    1.62
   3  -2  -5   33.96    1.57
  -3   2   5   34.70    1.59
  -3   2   5   33.95    1.61
  -3   2   5   33.74    1.53
  -3   2   5   36.84    1.44
   2  -2  -5   19.59    0.88
   2  -2  -5   20.00    0.98
   2  -2  -5   18.79    0.95
  -2   2   5   20.28    0.89
  -2   2   5   18.62    0.97
  -2   2   5   17.30    0.94
  -2   2   5   19.29    0.92
  -2   2   5   19.33    0.89
   1  -2  -5    3.90    0.37
   1  -2  -5    3.81    0.36
   1  -2  -5    4.41    0.35
   1  -2  -5    4.00    0.39
   1  -2  -5    3.80    0.34
  -1   2   5    3.64    0.34
  -1   2   5    3.12    0.34
  -1   2   5    3.99    0.36
  -1   2   5    3.72    0.28
  -1   2   5    3.68    0.37
   0  -2  -5    8.18    0.48
   0  -2  -5    6.79    0.46
   0  -2  -5    7.64    0.47
   0  -2  -5    7.12    0.46
   0  -2  -5    8.28    0.46
   0   2   5    7.45    0.44
   0   2   5    7.13    0.40
   0   2   5    8.26    0.48
   0   2   5    6.96    0.46
   0   2   5    7.83    0.48
   0   2   5    7.28    0.47
  -1  -2  -5   36.16    1.51
  -1  -2  -5   37.77    1.48
  -1  -2  -5   36.98    1.53
  -1  -2  -5   33.24    1.48
  -1  -2  -5   36.58    1.53
  -1  -2  -5   36.71    1.37
   1   2   5   35.61    1.47
   1   2   5   32.73    1.50
   1   2   5   35.33    1.37
   1   2   5   34.99    1.49
   1   2   5   36.96    1.53
  -2  -2  -5   62.68    2.38
  -2  -2  -5   55.85    2.37
  -2  -2  -5   64.87    2.24
  -2  -2  -5   63.32    2.45
  -2  -2  -5   60.13    2.45
   2   2   5   63.58    2.46
   2   2   5   59.58    2.37
   2   2   5   59.02    2.22
   2   2   5   61.73    2.40
   2   2   5   57.11    2.43
  -3  -2  -5    6.34    0.44
  -3  -2  -5    5.62    0.44
  -3  -2  -5    6.50    0.37
   3   2   5    5.66    0.41
   3   2   5    6.11    0.44
   3   2   5    6.56    0.38
   3   2   5    6.41    0.46
   3   2   5    6.61    0.45
  -4  -2  -5   53.48    2.30
  -4  -2  -5   56.41    2.21
   4   2   5   58.36    2.31
   4   2   5   54.59    2.28
   4   2   5   54.37    2.10
   4   2   5   51.45    2.19
  -5  -2  -5    0.12    0.13
  -5  -2  -5   -0.03    0.13
   5   2   5    0.01    0.18
   5   2   5    0.11    0.15
   5   2   5    0.08    0.15
  -6  -2  -5   -0.16    0.12
  -6  -2  -5    0.11    0.17
   6   2   5   -0.04    0.18
   6   2   5   -0.10    0.15
  -7  -2  -5    3.41    0.48
  -7  -2  -5    3.01    0.36
  -7  -2  -5    2.85    0.48
   7   2   5    2.93    0.44
   7   2   5    2.68    0.43
  -8  -2  -5   20.76    1.24
  -8  -2  -5   22.67    1.33
   8   2   5   19.64    1.18
   8   2   5   19.48    1.20
  -9  -2  -5    0.23    0.29
  -9  -2  -5    0.05    0.25
   9   2   5    0.07    0.22
   9   2   5    0.11    0.25
 -10  -2  -5    0.09    0.28
  10   2   5   -0.24    0.24
  10   2   5   -0.01    0.25
   9  -3  -5    0.48    0.31
   9  -3  -5    0.23    0.34
  -9   3   5    1.31    0.47
  -9   3   5    0.79    0.39
   8  -3  -5    0.36    0.29
   8  -3  -5    0.16    0.31
  -8   3   5    0.10    0.26
  -8   3   5   -0.18    0.30
   7  -3  -5    0.88    0.31
   7  -3  -5    0.70    0.32
  -7   3   5    1.15    0.34
  -7   3   5    0.89    0.35
  -7   3   5    0.48    0.35
   6  -3  -5    2.41    0.42
   6  -3  -5    1.09    0.32
  -6   3   5    1.94    0.40
  -6   3   5    0.80    0.32
  -6   3   5    1.45    0.39
   5  -3  -5    1.40    0.30
   5  -3  -5    1.72    0.35
  -5   3   5    1.12    0.32
  -5   3   5    1.79    0.33
  -5   3   5    1.27    0.36
  -5   3   5    1.33    0.18
   4  -3  -5   20.19    0.89
   4  -3  -5   19.58    1.05
   4  -3  -5   20.02    0.77
   4  -3  -5   19.63    1.02
   4  -3  -5   20.48    1.10
  -4   3   5   19.86    1.06
  -4   3   5   20.47    1.08
  -4   3   5   22.00    1.15
  -4   3   5   20.23    0.90
   3  -3  -5   -0.06    0.05
   3  -3  -5   -0.03    0.10
   3  -3  -5   -0.17    0.11
   3  -3  -5   -0.15    0.10
  -3   3   5   -0.07    0.08
  -3   3   5    0.08    0.15
  -3   3   5    0.23    0.17
  -3   3   5    0.05    0.13
   2  -3  -5    0.06    0.09
   2  -3  -5    0.03    0.10
   2  -3  -5    0.02    0.10
  -2   3   5    0.11    0.13
  -2   3   5   -0.03    0.10
  -2   3   5   -0.08    0.08
  -2   3   5   -0.08    0.09
   1  -3  -5    5.10    0.39
   1  -3  -5    5.58    0.41
   1  -3  -5    5.25    0.39
   1  -3  -5    5.13    0.37
  -1   3   5    5.87    0.41
  -1   3   5    5.62    0.40
  -1   3   5    5.60    0.39
  -1   3   5    5.43    0.36
  -1   3   5    5.10    0.39
   0  -3  -5   12.57    0.68
   0  -3  -5   14.85    0.71
   0  -3  -5   12.48    0.69
   0  -3  -5   14.28    0.72
   0  -3  -5   13.67    0.70
   0   3   5   13.69    0.61
   0   3   5   13.00    0.69
   0   3   5   13.49    0.71
   0   3   5   14.05    0.71
   0   3   5   12.88    0.70
   0   3   5   14.28    0.71
  -1  -3  -5   42.58    1.72
  -1  -3  -5   43.61    1.77
  -1  -3  -5   41.85    1.73
  -1  -3  -5   41.19    1.72
  -1  -3  -5   41.42    1.76
   1   3   5   40.77    1.75
   1   3   5   41.34    1.73
   1   3   5   40.07    1.55
   1   3   5   44.89    1.78
   1   3   5   41.44    1.72
  -2  -3  -5   26.96    1.19
  -2  -3  -5   24.46    1.19
  -2  -3  -5   27.88    1.21
  -2  -3  -5   26.53    1.03
   2   3   5   26.39    1.03
   2   3   5   25.77    1.20
   2   3   5   25.02    1.17
   2   3   5   28.69    1.23
  -3  -3  -5   85.57    3.02
  -3  -3  -5   82.19    3.24
  -3  -3  -5   81.57    3.35
   3   3   5   85.49    3.03
   3   3   5   88.58    3.37
   3   3   5   84.80    3.26
   3   3   5   80.93    3.33
  -4  -3  -5    0.69    0.16
  -4  -3  -5    0.55    0.18
  -4  -3  -5    1.68    0.28
   4   3   5    0.47    0.18
   4   3   5    0.71    0.20
   4   3   5    0.49    0.14
  -5  -3  -5    1.11    0.23
  -5  -3  -5    0.88    0.25
   5   3   5    0.68    0.23
   5   3   5    1.07    0.25
  -6  -3  -5    2.27    0.40
  -6  -3  -5    1.92    0.30
   6   3   5    2.11    0.37
   6   3   5    2.25    0.39
  -7  -3  -5    0.21    0.23
  -7  -3  -5    0.04    0.22
   7   3   5    0.22    0.22
   7   3   5    0.00    0.22
  -8  -3  -5    0.07    0.21
  -8  -3  -5    0.30    0.26
   8   3   5   -0.14    0.21
   8   3   5    0.04    0.21
  -9  -3  -5    2.05    0.49
  -9  -3  -5    3.00    0.56
   9   3   5    2.84    0.53
   9   3   5    2.32    0.48
 -10  -3  -5    0.02    0.23
 -10  -3  -5    0.13    0.27
 -10  -3  -5    0.05    0.25
  10   3   5    0.17    0.30
  10   3   5    0.20    0.31
   9  -4  -5    0.27    0.32
  -9   4   5    0.00    0.31
  -9   4   5    0.11    0.39
   8  -4  -5    0.47    0.35
   8  -4  -5    1.00    0.35
  -8   4   5    0.19    0.30
  -8   4   5    0.78    0.42
   7  -4  -5    1.59    0.40
   7  -4  -5    1.87    0.42
  -7   4   5    1.13    0.43
  -7   4   5    1.27    0.40
  -7   4   5    1.67    0.38
   6  -4  -5    0.07    0.19
   6  -4  -5   -0.23    0.19
  -6   4   5    0.13    0.26
  -6   4   5   -0.19    0.23
  -6   4   5   -0.27    0.17
   5  -4  -5    0.27    0.21
   5  -4  -5    0.47    0.26
   5  -4  -5    0.38    0.21
  -5   4   5    0.17    0.25
  -5   4   5    0.67    0.28
  -5   4   5    0.57    0.25
  -5   4   5    0.44    0.12
   4  -4  -5   57.57    2.38
   4  -4  -5   53.95    2.29
   4  -4  -5   52.28    2.32
   4  -4  -5   55.14    2.05
  -4   4   5   55.88    2.34
  -4   4   5   52.89    2.43
  -4   4   5   56.87    2.16
  -4   4   5   53.30    2.35
   3  -4  -5    1.40    0.21
   3  -4  -5    1.71    0.30
   3  -4  -5    1.61    0.27
   3  -4  -5    1.58    0.19
  -3   4   5    1.62    0.23
  -3   4   5    1.17    0.26
  -3   4   5    1.46    0.29
  -3   4   5    1.13    0.24
   2  -4  -5    0.08    0.10
   2  -4  -5   -0.01    0.08
   2  -4  -5   -0.09    0.09
   2  -4  -5   -0.03    0.09
  -2   4   5    0.04    0.12
  -2   4   5    0.05    0.10
  -2   4   5    0.04    0.13
  -2   4   5    0.17    0.15
   1  -4  -5    0.64    0.17
   1  -4  -5    0.64    0.16
   1  -4  -5    0.66    0.17
   1  -4  -5    0.67    0.17
  -1   4   5    0.51    0.16
  -1   4   5    0.82    0.18
  -1   4   5    0.68    0.17
  -1   4   5    0.87    0.20
   0  -4  -5   43.58    1.73
   0  -4  -5   40.25    1.71
   0  -4  -5   43.55    1.77
   0  -4  -5   39.49    1.75
   0   4   5   40.98    1.74
   0   4   5   39.60    1.71
   0   4   5   41.43    1.55
   0   4   5   43.22    1.77
  -1  -4  -5    1.31    0.23
  -1  -4  -5    1.75    0.21
  -1  -4  -5    2.14    0.28
  -1  -4  -5    1.92    0.27
   1   4   5    1.77    0.17
   1   4   5    1.88    0.28
   1   4   5    2.01    0.26
  -2  -4  -5    3.78    0.38
  -2  -4  -5    3.97    0.41
  -2  -4  -5    3.67    0.39
  -2  -4  -5    4.05    0.23
   2   4   5    3.34    0.22
   2   4   5    3.78    0.38
   2   4   5    3.32    0.38
  -3  -4  -5   13.49    0.57
  -3  -4  -5   12.19    0.72
  -3  -4  -5   12.75    0.75
   3   4   5   13.13    0.75
   3   4   5   12.61    0.57
   3   4   5   12.37    0.71
  -4  -4  -5   34.77    1.51
  -4  -4  -5   34.97    1.33
  -4  -4  -5   33.14    1.58
   4   4   5   33.56    1.57
   4   4   5   32.15    1.51
  -5  -4  -5    0.04    0.17
   5   4   5   -0.09    0.16
  -6  -4  -5    0.98    0.33
  -6  -4  -5    0.99    0.30
   6   4   5    1.00    0.31
   6   4   5    1.12    0.30
  -7  -4  -5    1.46    0.39
  -7  -4  -5    1.31    0.34
   7   4   5    1.46    0.35
   7   4   5    1.39    0.36
  -8  -4  -5    0.07    0.24
  -8  -4  -5   -0.37    0.18
  -8  -4  -5    0.37    0.24
   8   4   5   -0.12    0.23
   8   4   5    0.12    0.23
  -9  -4  -5    6.26    0.68
  -9  -4  -5    6.17    0.78
  -9  -4  -5    6.63    0.82
   9   4   5    5.05    0.71
   9   4   5    5.92    0.73
 -10  -4  -5    0.57    0.29
 -10  -4  -5   -0.04    0.26
 -10  -4  -5   -0.01    0.28
  10   4   5    0.48    0.36
  10   4   5    0.14    0.29
   8  -5  -5    0.29    0.28
   8  -5  -5    0.40    0.34
  -8   5   5    0.52    0.37
  -8   5   5   -0.08    0.30
   7  -5  -5    0.57    0.36
   7  -5  -5    0.74    0.29
  -7   5   5    0.14    0.26
  -7   5   5    0.29    0.33
   6  -5  -5    5.18    0.64
   6  -5  -5    4.63    0.54
  -6   5   5    3.20    0.54
  -6   5   5    4.44    0.51
  -6   5   5    4.76    0.65
   5  -5  -5   12.86    0.89
   5  -5  -5   12.12    0.78
   5  -5  -5   12.33    0.84
   5  -5  -5   12.34    0.51
  -5   5   5   11.43    0.77
  -5   5   5   12.16    0.88
  -5   5   5   12.71    0.90
   4  -5  -5    1.82    0.33
   4  -5  -5    1.28    0.18
   4  -5  -5    1.21    0.26
  -4   5   5    1.21    0.31
  -4   5   5    1.28    0.22
  -4   5   5    1.10    0.31
  -4   5   5    1.55    0.28
   3  -5  -5   18.96    0.98
   3  -5  -5   19.30    0.88
   3  -5  -5   21.11    1.03
  -3   5   5   17.46    1.01
  -3   5   5   19.47    1.05
  -3   5   5   19.24    0.98
   2  -5  -5    0.14    0.13
   2  -5  -5    0.09    0.11
   2  -5  -5    0.21    0.16
  -2   5   5    0.11    0.15
  -2   5   5    0.34    0.15
  -2   5   5    0.25    0.16
   1  -5  -5    0.47    0.15
   1  -5  -5    0.43    0.16
   1  -5  -5    0.09    0.13
   1  -5  -5    0.55    0.17
  -1   5   5    0.49    0.16
  -1   5   5    0.83    0.20
  -1   5   5    0.57    0.19
   0  -5  -5    0.62    0.20
   0  -5  -5    1.20    0.22
   0  -5  -5    1.55    0.25
   0  -5  -5    1.12    0.19
   0   5   5    0.79    0.17
   0   5   5    1.28    0.23
   0   5   5    0.98    0.22
  -1  -5  -5    0.34    0.15
  -1  -5  -5    0.29    0.14
  -1  -5  -5    0.32    0.12
  -1  -5  -5    0.17    0.15
  -1  -5  -5    0.39    0.16
   1   5   5    0.05    0.12
   1   5   5    0.33    0.14
   1   5   5    0.39    0.08
  -2  -5  -5   17.56    0.77
  -2  -5  -5   15.94    0.88
   2   5   5   15.66    0.85
   2   5   5   16.86    0.64
   2   5   5   16.23    0.87
  -3  -5  -5    3.76    0.44
  -3  -5  -5    4.30    0.25
   3   5   5    4.10    0.45
   3   5   5    3.90    0.41
  -4  -5  -5   22.04    1.20
  -4  -5  -5   23.71    0.94
   4   5   5   23.55    1.15
   4   5   5   22.16    1.19
  -5  -5  -5    1.54    0.23
  -5  -5  -5    1.63    0.34
   5   5   5    1.26    0.30
  -6  -5  -5    1.90    0.36
  -6  -5  -5    2.57    0.38
  -6  -5  -5    2.14    0.43
   6   5   5    1.84    0.37
   6   5   5    1.72    0.37
  -7  -5  -5    4.59    0.57
  -7  -5  -5    4.89    0.65
  -7  -5  -5    4.76    0.57
   7   5   5    4.79    0.61
   7   5   5    4.25    0.60
  -8  -5  -5    1.35    0.42
  -8  -5  -5    1.20    0.36
  -8  -5  -5    1.12    0.32
   8   5   5    1.13    0.37
   8   5   5    1.32    0.38
  -9  -5  -5   -0.05    0.24
  -9  -5  -5    0.14    0.31
  -9  -5  -5    0.14    0.25
   9   5   5   -0.17    0.26
   9   5   5    0.23    0.34
 -10  -5  -5   -0.04    0.33
 -10  -5  -5   -0.26    0.23
 -10  -5  -5    0.40    0.33
  10   5   5    0.01    0.32
  10   5   5    0.07    0.29
   8  -6  -5    0.29    0.33
   8  -6  -5    0.06    0.23
  -8   6   5    0.47    0.37
  -8   6   5   -0.31    0.30
   7  -6  -5    0.90    0.29
   7  -6  -5    0.62    0.35
  -7   6   5    0.20    0.31
  -7   6   5    0.22    0.34
   6  -6  -5    1.79    0.35
  -6   6   5    2.82    0.53
  -6   6   5    2.87    0.52
   5  -6  -5    4.78    0.50
   5  -6  -5    4.66    0.31
  -5   6   5    3.81    0.45
  -5   6   5    3.75    0.54
  -5   6   5    3.68    0.55
   4  -6  -5   46.90    2.05
   4  -6  -5   49.52    2.10
   4  -6  -5   48.06    1.89
  -4   6   5   46.43    2.17
  -4   6   5   45.10    2.13
  -4   6   5   47.52    2.04
   3  -6  -5    0.69    0.19
   3  -6  -5    0.93    0.20
   3  -6  -5    0.88    0.22
  -3   6   5    0.41    0.23
  -3   6   5    0.85    0.26
  -3   6   5    0.59    0.19
   2  -6  -5   15.63    0.83
   2  -6  -5   17.27    0.89
   2  -6  -5   16.58    0.87
  -2   6   5   16.85    0.89
  -2   6   5   16.86    0.95
  -2   6   5   17.17    0.88
   1  -6  -5   33.47    1.50
   1  -6  -5   32.17    1.46
   1  -6  -5   34.38    1.48
   1  -6  -5   32.84    1.50
  -1   6   5   34.10    1.47
  -1   6   5   34.85    1.50
  -1   6   5   33.44    1.53
   0  -6  -5    2.29    0.32
   0  -6  -5    1.54    0.28
   0  -6  -5    1.71    0.28
   0  -6  -5    1.99    0.24
   0   6   5    1.83    0.29
   0   6   5    1.48    0.26
   0   6   5    1.93    0.23
  -1  -6  -5   18.38    0.81
  -1  -6  -5   19.54    0.95
  -1  -6  -5   18.22    0.94
  -1  -6  -5   16.36    0.92
   1   6   5   18.35    0.64
   1   6   5   17.16    0.93
   1   6   5   16.53    0.91
  -2  -6  -5    2.48    0.35
  -2  -6  -5    2.77    0.22
  -2  -6  -5    2.19    0.35
   2   6   5    2.85    0.37
   2   6   5    3.11    0.38
  -3  -6  -5    7.84    0.59
  -3  -6  -5    7.63    0.60
  -3  -6  -5    8.53    0.36
   3   6   5    7.86    0.59
   3   6   5    8.85    0.58
  -4  -6  -5    8.76    0.68
  -4  -6  -5   10.96    0.47
  -4  -6  -5    8.98    0.67
   4   6   5   10.05    0.68
   4   6   5    9.79    0.71
  -5  -6  -5    0.94    0.17
  -5  -6  -5    0.83    0.21
  -5  -6  -5    0.85    0.27
  -5  -6  -5    0.76    0.29
   5   6   5    0.72    0.25
   5   6   5    0.61    0.26
  -6  -6  -5    3.18    0.52
  -6  -6  -5    3.33    0.41
  -6  -6  -5    2.71    0.44
   6   6   5    2.65    0.47
  -7  -6  -5    0.13    0.20
  -7  -6  -5   -0.26    0.20
  -7  -6  -5   -0.09    0.20
   7   6   5    0.80    0.32
   7   6   5    0.08    0.20
  -8  -6  -5    1.15    0.33
  -8  -6  -5    0.34    0.27
  -8  -6  -5    0.88    0.39
   8   6   5    0.40    0.33
   8   6   5    0.41    0.31
  -9  -6  -5   -0.08    0.23
  -9  -6  -5    0.31    0.28
  -9  -6  -5    0.06    0.31
   9   6   5    0.16    0.34
   9   6   5    0.07    0.30
 -10  -6  -5    0.16    0.25
 -10  -6  -5   -0.38    0.20
 -10  -6  -5    0.20    0.38
  10   6   5    0.03    0.32
  10   6   5    0.55    0.40
   8  -7  -5    0.14    0.25
  -8   7   5    0.08    0.33
  -8   7   5    0.11    0.39
   7  -7  -5    0.66    0.28
  -7   7   5   -0.20    0.28
  -7   7   5    0.87    0.40
   6  -7  -5    0.48    0.24
  -6   7   5    0.26    0.31
  -6   7   5    0.64    0.36
   5  -7  -5   21.49    1.13
   5  -7  -5   21.62    0.99
  -5   7   5   22.39    1.32
  -5   7   5   21.84    1.28
   4  -7  -5    0.95    0.24
   4  -7  -5    0.46    0.18
  -4   7   5    0.34    0.28
  -4   7   5    0.80    0.23
  -4   7   5    1.31    0.35
   3  -7  -5    6.32    0.46
   3  -7  -5    5.69    0.47
   3  -7  -5    5.71    0.55
  -3   7   5    6.39    0.53
  -3   7   5    5.66    0.46
  -3   7   5    5.54    0.62
   2  -7  -5   11.56    0.69
   2  -7  -5   10.95    0.68
   2  -7  -5   11.51    0.69
  -2   7   5   11.88    0.70
  -2   7   5   12.08    0.69
  -2   7   5   11.64    0.78
   1  -7  -5   -0.07    0.13
   1  -7  -5   -0.06    0.11
   1  -7  -5    0.01    0.11
   1  -7  -5    0.13    0.12
  -1   7   5    0.00    0.18
  -1   7   5    0.01    0.11
  -1   7   5    0.01    0.12
   0  -7  -5    1.48    0.27
   0  -7  -5    1.86    0.22
   0  -7  -5    1.78    0.31
   0  -7  -5    1.78    0.30
   0   7   5    1.76    0.13
   0   7   5    1.34    0.25
   0   7   5    1.77    0.22
   0   7   5    1.66    0.30
   0   7   5    1.89    0.14
  -1  -7  -5   12.65    0.78
  -1  -7  -5   13.19    0.78
  -1  -7  -5   14.67    0.79
  -1  -7  -5   12.84    0.61
   1   7   5   12.60    0.78
   1   7   5   13.25    0.77
  -2  -7  -5    6.53    0.62
  -2  -7  -5    7.74    0.39
  -2  -7  -5    7.64    0.59
   2   7   5    8.12    0.58
   2   7   5    7.08    0.55
  -3  -7  -5    0.47    0.11
  -3  -7  -5    0.86    0.27
  -3  -7  -5    0.42    0.22
   3   7   5    0.54    0.22
   3   7   5    0.13    0.19
  -4  -7  -5    0.77    0.11
  -4  -7  -5    0.51    0.26
  -4  -7  -5    1.00    0.18
  -4  -7  -5    0.39    0.22
   4   7   5    0.99    0.29
   4   7   5    0.82    0.27
  -5  -7  -5   10.19    0.79
  -5  -7  -5    9.22    0.58
  -5  -7  -5    9.19    0.70
  -5  -7  -5    9.61    0.48
   5   7   5    8.59    0.72
   5   7   5    8.89    0.68
  -6  -7  -5   14.04    0.83
  -6  -7  -5   15.12    1.05
  -6  -7  -5   13.72    0.94
   6   7   5   15.52    1.02
  -7  -7  -5    0.93    0.39
  -7  -7  -5    0.73    0.31
  -7  -7  -5    0.86    0.27
   7   7   5    1.53    0.42
   7   7   5    0.98    0.36
  -8  -7  -5   -0.10    0.29
  -8  -7  -5    0.21    0.24
  -8  -7  -5   -0.15    0.18
   8   7   5   -0.02    0.27
   8   7   5   -0.37    0.25
  -9  -7  -5   -0.06    0.22
  -9  -7  -5    0.77    0.34
  -9  -7  -5    0.27    0.36
   9   7   5    0.61    0.40
   9   7   5    0.74    0.38
 -10  -7  -5   -0.08    0.26
 -10  -7  -5    0.34    0.28
  10   7   5    0.35    0.39
   7  -8  -5    1.04    0.30
  -7   8   5    1.11    0.47
  -7   8   5    0.71    0.40
   6  -8  -5    1.11    0.29
  -6   8   5    0.83    0.35
  -6   8   5    1.14    0.42
   5  -8  -5   -0.07    0.13
   5  -8  -5   -0.03    0.17
  -5   8   5   -0.07    0.21
  -5   8   5   -0.15    0.23
   4  -8  -5    8.28    0.57
   4  -8  -5    7.09    0.53
  -4   8   5    7.18    0.70
  -4   8   5    6.25    0.72
   3  -8  -5    0.10    0.18
   3  -8  -5    0.66    0.22
  -3   8   5    0.30    0.27
  -3   8   5    0.50    0.22
  -3   8   5    0.49    0.19
   2  -8  -5    0.23    0.17
   2  -8  -5    0.17    0.17
   2  -8  -5    0.21    0.18
  -2   8   5   -0.03    0.19
  -2   8   5   -0.07    0.11
  -2   8   5    0.15    0.17
  -2   8   5   -0.13    0.15
   1  -8  -5    3.34    0.43
   1  -8  -5    3.12    0.40
   1  -8  -5    3.02    0.34
   1  -8  -5    3.68    0.43
  -1   8   5    3.22    0.39
  -1   8   5    3.69    0.35
  -1   8   5    3.37    0.24
  -1   8   5    2.60    0.42
   0  -8  -5    1.11    0.25
   0  -8  -5    0.61    0.20
   0  -8  -5    0.85    0.16
   0  -8  -5    0.97    0.27
   0   8   5    0.85    0.23
   0   8   5    0.82    0.06
   0   8   5    0.90    0.27
   0   8   5    0.81    0.06
  -1  -8  -5   21.49    1.13
  -1  -8  -5   22.48    0.91
  -1  -8  -5   19.72    1.14
  -1  -8  -5   23.97    1.15
   1   8   5   22.56    1.16
   1   8   5   20.80    1.11
  -2  -8  -5    6.46    0.29
  -2  -8  -5    6.54    0.63
  -2  -8  -5    6.02    0.62
   2   8   5    6.12    0.59
   2   8   5    6.10    0.60
  -3  -8  -5   12.95    0.56
  -3  -8  -5   13.86    0.86
  -3  -8  -5   13.50    0.88
  -3  -8  -5   13.03    0.55
   3   8   5   13.53    0.86
   3   8   5   11.79    0.79
  -4  -8  -5    1.24    0.33
  -4  -8  -5    1.22    0.17
  -4  -8  -5    1.71    0.38
   4   8   5    1.65    0.37
   4   8   5    1.76    0.35
  -5  -8  -5    2.74    0.48
  -5  -8  -5    2.43    0.29
  -5  -8  -5    1.62    0.38
   5   8   5    1.75    0.37
   5   8   5    1.61    0.40
  -6  -8  -5    1.34    0.26
  -6  -8  -5    1.84    0.40
  -6  -8  -5    1.33    0.41
   6   8   5    0.70    0.33
  -7  -8  -5   -0.09    0.22
  -7  -8  -5    0.11    0.17
  -7  -8  -5    0.03    0.25
   7   8   5    0.18    0.29
  -8  -8  -5    0.83    0.35
  -8  -8  -5    0.84    0.30
  -8  -8  -5    0.90    0.45
   8   8   5    1.39    0.44
   8   8   5    1.03    0.44
  -9  -8  -5   -0.01    0.24
  -9  -8  -5   -0.27    0.30
  -9  -8  -5    0.14    0.29
   9   8   5    0.35    0.39
   9   8   5   -0.17    0.31
   6  -9  -5    1.99    0.35
  -6   9   5    2.51    0.52
  -6   9   5    2.79    0.56
   5  -9  -5    0.77    0.25
   5  -9  -5    0.38    0.22
  -5   9   5    0.85    0.35
  -5   9   5    0.22    0.25
   4  -9  -5    0.47    0.20
   4  -9  -5    0.45    0.21
  -4   9   5    0.64    0.29
  -4   9   5    0.56    0.31
   3  -9  -5   -0.07    0.15
   3  -9  -5    0.05    0.17
  -3   9   5    0.19    0.23
  -3   9   5   -0.23    0.18
   2  -9  -5    0.00    0.16
   2  -9  -5    0.09    0.17
  -2   9   5   -0.04    0.16
  -2   9   5   -0.14    0.14
  -2   9   5   -0.28    0.19
   1  -9  -5    5.52    0.54
   1  -9  -5    6.41    0.58
   1  -9  -5    5.84    0.62
  -1   9   5    5.74    0.53
  -1   9   5    5.58    0.41
  -1   9   5    4.65    0.57
   0  -9  -5    1.27    0.29
   0  -9  -5    0.74    0.27
   0  -9  -5    1.22    0.29
   0   9   5    0.92    0.26
   0   9   5    0.80    0.28
  -1  -9  -5    9.15    0.70
  -1  -9  -5    9.92    0.68
  -1  -9  -5   10.24    0.74
   1   9   5    8.80    0.69
   1   9   5    9.81    0.68
  -2  -9  -5   70.62    3.02
  -2  -9  -5   71.07    3.01
   2   9   5   68.04    2.97
   2   9   5   72.58    2.94
  -3  -9  -5   -0.09    0.20
  -3  -9  -5    0.12    0.23
   3   9   5   -0.23    0.17
   3   9   5    0.07    0.23
  -4  -9  -5    0.73    0.32
  -4  -9  -5    0.57    0.28
   4   9   5    1.19    0.34
   4   9   5    1.00    0.31
  -5  -9  -5    9.23    0.94
  -5  -9  -5    9.46    0.91
   5   9   5    9.51    0.90
   5   9   5   10.34    0.79
  -6  -9  -5    0.02    0.28
  -6  -9  -5    0.76    0.32
   6   9   5   -0.25    0.22
  -7  -9  -5    0.52    0.37
  -7  -9  -5    0.79    0.34
   7   9   5    0.57    0.33
  -8  -9  -5    1.38    0.50
  -8  -9  -5    0.55    0.35
   8   9   5    1.47    0.45
   8   9   5    1.29    0.49
  -9  -9  -5    1.42    0.45
  -9  -9  -5    1.22    0.54
   9   9   5    1.90    0.55
   9   9   5    1.12    0.49
   6 -10  -5    0.73    0.24
  -6  10   5    1.40    0.49
  -6  10   5    0.72    0.35
   5 -10  -5    1.41    0.29
  -5  10   5    0.71    0.38
  -5  10   5    0.64    0.35
   4 -10  -5    0.03    0.18
   4 -10  -5    0.87    0.23
  -4  10   5    0.77    0.31
  -4  10   5    0.73    0.32
   3 -10  -5    0.16    0.21
   3 -10  -5    0.17    0.18
  -3  10   5    0.53    0.27
  -3  10   5    0.21    0.21
   2 -10  -5   -0.08    0.17
   2 -10  -5    0.18    0.22
  -2  10   5   -0.34    0.15
  -2  10   5   -0.15    0.15
   1 -10  -5   13.80    0.87
   1 -10  -5   16.01    0.98
  -1  10   5   15.23    0.74
  -1  10   5   14.47    0.97
   0 -10  -5    0.43    0.22
   0 -10  -5    0.80    0.28
   0  10   5    0.11    0.22
   0  10   5    0.39    0.22
  -1 -10  -5    0.21    0.23
  -1 -10  -5   -0.10    0.18
   1  10   5   -0.13    0.20
   1  10   5   -0.35    0.17
  -2 -10  -5    1.39    0.35
  -2 -10  -5    1.40    0.38
   2  10   5    2.44    0.41
   2  10   5    1.31    0.35
  -3 -10  -5    9.76    0.89
  -3 -10  -5    8.34    0.84
   3  10   5    7.82    0.78
   3  10   5    9.09    0.71
  -4 -10  -5   13.70    0.98
  -4 -10  -5   13.54    1.03
   4  10   5   14.73    0.94
   4  10   5   14.97    1.01
  -5 -10  -5    6.41    0.79
  -5 -10  -5    7.95    0.88
   5  10   5    6.61    0.71
   5  10   5    7.29    0.80
  -6 -10  -5    0.04    0.24
  -6 -10  -5   -0.32    0.25
   6  10   5   -0.09    0.25
  -7 -10  -5   -0.13    0.35
  -7 -10  -5    0.30    0.34
   7  10   5    0.50    0.36
  -8 -10  -5    0.02    0.31
  -8 -10  -5   -0.08    0.35
   8  10   5    0.04    0.36
   8  10   5   -0.11    0.31
   5 -11  -5   -0.01    0.17
  -5  11   5   -0.39    0.28
   4 -11  -5    0.27    0.19
   4 -11  -5   -0.04    0.19
  -4  11   5    0.21    0.28
   3 -11  -5   -0.03    0.20
   3 -11  -5   -0.04    0.17
  -3  11   5   -0.28    0.24
   2 -11  -5    0.39    0.27
   2 -11  -5    0.20    0.20
  -2  11   5    0.31    0.31
   1 -11  -5    0.37    0.23
   1 -11  -5    0.99    0.33
  -1  11   5    1.11    0.38
   0 -11  -5    0.19    0.23
   0 -11  -5    0.45    0.26
   0  11   5    0.50    0.30
  -1 -11  -5    0.47    0.23
  -1 -11  -5   -0.28    0.17
   1  11   5    0.13    0.25
  -2 -11  -5    9.97    0.78
  -2 -11  -5    7.36    0.82
   2  11   5    6.49    0.71
   2  11   5    7.73    0.75
  -3 -11  -5    0.39    0.31
  -3 -11  -5   -0.15    0.24
   3  11   5    0.09    0.25
   3  11   5   -0.05    0.21
  -4 -11  -5    4.12    0.64
  -4 -11  -5    3.63    0.60
   4  11   5    3.51    0.52
   4  11   5    3.02    0.54
  -5 -11  -5    0.74    0.31
  -5 -11  -5    0.43    0.34
   5  11   5    0.86    0.35
   5  11   5    0.15    0.31
  -6 -11  -5    2.97    0.63
  -6 -11  -5    2.53    0.57
   6  11   5    2.42    0.55
  -7 -11  -5   -0.19    0.25
  -7 -11  -5    0.02    0.37
   7  11   5    0.31    0.37
   4 -12  -5    0.26    0.19
   4 -12  -5    0.56    0.30
  -4  12   5    0.25    0.34
   3 -12  -5    1.51    0.32
   3 -12  -5    0.81    0.33
  -3  12   5    1.87    0.49
   2 -12  -5    1.75    0.44
   2 -12  -5    2.96    0.42
  -2  12   5    2.43    0.52
   1 -12  -5    0.30    0.22
   1 -12  -5   -0.01    0.21
  -1  12   5   -0.18    0.26
   0 -12  -5    0.40    0.25
   0 -12  -5    0.53    0.31
   0  12   5    0.40    0.30
  -1 -12  -5    0.23    0.26
  -1 -12  -5   -0.08    0.21
   1  12   5   -0.18    0.24
  -2 -12  -5    0.07    0.26
  -2 -12  -5    0.21    0.28
   2  12   5    0.13    0.25
  -3 -12  -5    0.48    0.30
  -3 -12  -5    0.16    0.27
   3  12   5    0.30    0.27
  -4 -12  -5    0.67    0.36
  -4 -12  -5    1.66    0.46
   4  12   5    1.23    0.43
   4  12   5    0.88    0.34
  -5 -12  -5   -0.03    0.27
  -5 -12  -5   -0.01    0.28
   5  12   5   -0.13    0.25
   5  12   5    0.32    0.29
  -6 -12  -5    2.44    0.58
  -6 -12  -5    2.31    0.64
   6  12   5    2.00    0.53
   2 -13  -5    1.05    0.38
   2 -13  -5    0.57    0.25
  -2  13   5    0.31    0.38
   1 -13  -5    0.19    0.23
   1 -13  -5   -0.01    0.27
  -1  13   5    0.16    0.31
   0 -13  -5    0.48    0.29
   0 -13  -5   -0.06    0.27
   0  13   5   -0.10    0.28
  -1 -13  -5    0.10    0.27
  -1 -13  -5    0.09    0.28
   1  13   5    0.01    0.31
  -2 -13  -5    0.40    0.34
  -2 -13  -5    0.36    0.31
   2  13   5    0.35    0.29
  -3 -13  -5   -0.19    0.26
  -3 -13  -5    0.03    0.28
   3  13   5    0.13    0.30
  -4 -13  -5    0.49    0.36
  -4 -13  -5    1.22    0.44
   4  13   5    0.98    0.39
   1  11  -6    0.63    0.40
  -1 -11   6    0.13    0.26
  -1 -11   6    0.22    0.41
  -1 -11   6    0.42    0.28
   0  11  -6   -0.09    0.32
   0 -11   6    0.10    0.39
   0 -11   6   -0.03    0.21
   0 -11   6   -0.02    0.26
  -1  11  -6    1.19    0.50
   1 -11   6    1.16    0.36
   1 -11   6    2.23    0.34
  -2  11  -6    0.44    0.40
   2 -11   6    0.80    0.33
   3  10  -6    2.63    0.59
  -3 -10   6    3.65    0.63
  -3 -10   6    3.35    0.53
  -3 -10   6    3.64    0.67
   2  10  -6    0.63    0.39
  -2 -10   6    0.45    0.37
  -2 -10   6    0.76    0.32
  -2 -10   6    0.90    0.31
   1  10  -6   -0.03    0.31
  -1 -10   6    0.38    0.24
  -1 -10   6   -0.13    0.22
  -1 -10   6   -0.46    0.27
   0  10  -6   -0.21    0.31
   0 -10   6    0.16    0.21
   0 -10   6   -0.11    0.22
   0 -10   6   -0.16    0.27
  -1  10  -6   -0.08    0.29
   1 -10   6   -0.08    0.19
   1 -10   6    0.34    0.20
  -2  10  -6    3.26    0.64
   2 -10   6    4.20    0.56
   2 -10   6    3.55    0.35
  -3  10  -6    0.16    0.34
   3 -10   6    0.35    0.27
  -4  10  -6    1.29    0.47
   4 -10   6    0.70    0.32
   5   9  -6    1.78    0.51
  -5  -9   6    2.59    0.51
  -5  -9   6    1.38    0.44
   4   9  -6    1.67    0.50
  -4  -9   6    2.35    0.54
  -4  -9   6    3.65    0.54
  -4  -9   6    2.93    0.59
   3   9  -6    0.06    0.27
  -3  -9   6    0.12    0.29
  -3  -9   6    0.15    0.23
  -3  -9   6    0.41    0.35
   2   9  -6    1.21    0.41
  -2  -9   6    1.58    0.35
  -2  -9   6    1.86    0.48
  -2  -9   6    0.64    0.29
   1   9  -6   -0.05    0.25
  -1  -9   6    0.06    0.31
  -1  -9   6    0.01    0.19
  -1  -9   6    0.35    0.25
   0   9  -6   -0.18    0.24
   0  -9   6   -0.15    0.26
   0  -9   6    0.13    0.22
   0  -9   6    0.39    0.21
  -1   9  -6    0.72    0.36
   1  -9   6    0.33    0.24
   1  -9   6    0.86    0.24
  -2   9  -6    1.47    0.44
   2  -9   6    1.76    0.26
   2  -9   6    1.50    0.37
  -3   9  -6    0.41    0.32
   3  -9   6    0.26    0.24
  -4   9  -6    2.11    0.51
   4  -9   6    1.26    0.38
  -5   9  -6    0.24    0.33
   5  -9   6    0.17    0.28
  -6   9  -6    0.11    0.32
  -6   9  -6    0.26    0.29
   6  -9   6    0.03    0.28
   6   8  -6    0.58    0.34
  -6  -8   6    0.04    0.27
   5   8  -6    0.75    0.36
   5   8  -6    0.52    0.34
  -5  -8   6    1.34    0.44
  -5  -8   6    0.69    0.33
  -5  -8   6    0.25    0.35
   4   8  -6    0.94    0.37
   4   8  -6    0.60    0.34
  -4  -8   6    0.06    0.31
  -4  -8   6    0.92    0.37
  -4  -8   6    0.55    0.30
   3   8  -6    1.14    0.36
   3   8  -6    0.76    0.30
  -3  -8   6    1.20    0.31
  -3  -8   6    1.43    0.40
  -3  -8   6    1.13    0.38
   2   8  -6    0.26    0.22
   2   8  -6   -0.28    0.22
  -2  -8   6   -0.27    0.22
  -2  -8   6    0.64    0.26
  -2  -8   6    0.41    0.27
   1   8  -6    3.30    0.56
  -1  -8   6    4.08    0.62
  -1  -8   6    3.46    0.47
  -1  -8   6    2.67    0.44
   0   8  -6    6.52    0.78
   0  -8   6    7.55    0.68
   0  -8   6    7.14    0.81
   0  -8   6    7.47    0.59
  -1   8  -6    7.49    0.82
   1  -8   6    7.76    0.56
   1  -8   6    8.09    0.72
  -2   8  -6    0.17    0.26
   2  -8   6    0.51    0.25
   2  -8   6    0.39    0.16
  -3   8  -6    1.99    0.45
   3  -8   6    1.87    0.38
   3  -8   6    1.28    0.18
  -4   8  -6    2.86    0.36
  -4   8  -6    2.21    0.47
   4  -8   6    2.57    0.46
  -5   8  -6    1.57    0.32
  -5   8  -6    1.41    0.40
   5  -8   6    0.02    0.24
  -6   8  -6    0.27    0.30
   6  -8   6    0.19    0.25
  -7   8  -6    0.50    0.33
  -7   8  -6   -0.04    0.34
   7  -8   6   -0.05    0.28
   6   7  -6    1.92    0.51
   6   7  -6    3.04    0.55
  -6  -7   6    2.42    0.49
  -6  -7   6    2.24    0.48
  -6  -7   6    2.64    0.48
  -6  -7   6    2.32    0.59
   5   7  -6    3.49    0.60
   5   7  -6    2.83    0.52
  -5  -7   6    3.79    0.65
  -5  -7   6    4.37    0.58
  -5  -7   6    4.26    0.59
  -5  -7   6    4.65    0.64
   4   7  -6    0.76    0.32
   4   7  -6    0.29    0.26
  -4  -7   6    0.80    0.31
  -4  -7   6    0.10    0.27
  -4  -7   6    0.55    0.31
   3   7  -6    0.40    0.28
   3   7  -6    0.15    0.23
  -3  -7   6    0.30    0.22
  -3  -7   6    0.23    0.27
  -3  -7   6    0.29    0.26
   2   7  -6   11.54    0.89
   2   7  -6   12.21    0.82
  -2  -7   6   10.73    0.86
  -2  -7   6   10.58    0.74
  -2  -7   6   11.89    0.85
   1   7  -6    3.19    0.43
   1   7  -6    3.36    0.55
  -1  -7   6    3.46    0.48
  -1  -7   6    3.94    0.56
  -1  -7   6    2.66    0.42
   0   7  -6    0.12    0.17
   0   7  -6    0.11    0.24
   0  -7   6    0.03    0.19
   0  -7   6    0.12    0.19
  -1   7  -6    0.06    0.13
  -1   7  -6    0.26    0.27
   1  -7   6    0.11    0.15
   1  -7   6   -0.01    0.18
  -2   7  -6    1.22    0.37
  -2   7  -6    0.62    0.13
   2  -7   6    0.62    0.18
   2  -7   6    0.51    0.25
  -3   7  -6    5.46    0.38
  -3   7  -6    5.30    0.65
   3  -7   6    3.89    0.52
   3  -7   6    4.52    0.33
  -4   7  -6    4.33    0.60
   4  -7   6    4.90    0.23
   4  -7   6    3.56    0.53
   4  -7   6    4.64    0.23
  -5   7  -6   -0.05    0.24
   5  -7   6    0.44    0.28
   5  -7   6    0.11    0.19
  -6   7  -6    0.19    0.28
   6  -7   6    0.13    0.23
   6  -7   6    0.17    0.25
  -7   7  -6    0.42    0.31
  -7   7  -6    0.66    0.39
   7  -7   6   -0.02    0.25
  -8   7  -6    3.51    0.67
   8  -7   6    3.01    0.55
   7   6  -6    0.20    0.30
   7   6  -6    1.54    0.51
  -7  -6   6    0.99    0.49
  -7  -6   6    1.06    0.43
   6   6  -6    3.97    0.58
   6   6  -6    3.69    0.64
  -6  -6   6    4.44    0.66
  -6  -6   6    3.18    0.64
   5   6  -6    0.33    0.28
   5   6  -6    0.22    0.26
  -5  -6   6    0.97    0.33
  -5  -6   6    0.61    0.28
  -5  -6   6    0.76    0.30
  -5  -6   6    0.15    0.31
   4   6  -6    0.91    0.32
   4   6  -6    1.13    0.35
  -4  -6   6    0.95    0.31
  -4  -6   6    0.42    0.26
  -4  -6   6    0.60    0.27
  -4  -6   6    0.75    0.35
   3   6  -6    0.09    0.22
   3   6  -6    0.05    0.22
  -3  -6   6    0.06    0.20
  -3  -6   6    0.43    0.26
  -3  -6   6   -0.05    0.22
   2   6  -6    6.87    0.65
   2   6  -6    5.88    0.66
  -2  -6   6    5.72    0.64
  -2  -6   6    6.17    0.65
  -2  -6   6    5.71    0.60
   1   6  -6   16.30    0.95
   1   6  -6   17.96    1.07
  -1  -6   6   16.08    1.02
  -1  -6   6   16.64    0.98
  -1  -6   6   15.45    0.92
  -1  -6   6   18.91    1.01
   0   6  -6    4.73    0.59
   0   6  -6    4.82    0.48
   0  -6   6    5.11    0.52
   0  -6   6    6.40    0.51
   0  -6   6    6.40    0.59
  -1   6  -6    2.77    0.47
  -1   6  -6    3.50    0.24
  -1   6  -6    3.52    0.37
   1  -6   6    3.39    0.38
   1  -6   6    4.05    0.41
   1  -6   6    2.56    0.39
  -2   6  -6    4.22    0.55
  -2   6  -6    4.76    0.34
  -2   6  -6    4.38    0.33
  -2   6  -6    4.37    0.29
   2  -6   6    3.06    0.34
   2  -6   6    4.51    0.51
   2  -6   6    4.25    0.39
  -3   6  -6   18.16    1.08
  -3   6  -6   18.12    0.86
  -3   6  -6   16.70    0.80
   3  -6   6   17.68    0.99
   3  -6   6   17.24    0.81
   3  -6   6   17.59    0.82
  -4   6  -6    1.50    0.38
   4  -6   6    1.54    0.34
   4  -6   6    1.82    0.29
   4  -6   6    1.72    0.18
   4  -6   6    1.68    0.18
  -5   6  -6    4.21    0.55
   5  -6   6    3.09    0.49
   5  -6   6    3.87    0.20
   5  -6   6    3.29    0.43
   5  -6   6    3.49    0.19
  -6   6  -6    1.71    0.40
   6  -6   6    1.35    0.34
   6  -6   6    2.30    0.45
  -7   6  -6    3.51    0.52
   7  -6   6    3.61    0.52
  -8   6  -6    1.08    0.44
   8  -6   6    0.22    0.29
   7   5  -6    0.01    0.21
   7   5  -6    0.41    0.37
  -7  -5   6   -0.10    0.31
  -7  -5   6    0.29    0.36
   6   5  -6   -0.22    0.25
   6   5  -6   -0.17    0.20
  -6  -5   6    0.01    0.29
  -6  -5   6    0.04    0.25
   5   5  -6    0.22    0.16
   5   5  -6    0.41    0.24
   5   5  -6    0.08    0.26
  -5  -5   6   -0.24    0.22
  -5  -5   6    0.03    0.24
   4   5  -6    0.28    0.13
   4   5  -6    0.13    0.20
   4   5  -6    0.32    0.25
  -4  -5   6    0.23    0.23
  -4  -5   6    0.53    0.12
  -4  -5   6    0.17    0.21
  -4  -5   6    0.47    0.29
   3   5  -6    0.43    0.26
   3   5  -6    0.64    0.11
   3   5  -6    0.82    0.27
  -3  -5   6    0.39    0.20
  -3  -5   6    0.19    0.24
  -3  -5   6    0.75    0.28
   2   5  -6    0.43    0.24
   2   5  -6    0.94    0.27
  -2  -5   6    0.42    0.26
  -2  -5   6    0.63    0.24
   1   5  -6   12.68    0.88
   1   5  -6   12.94    0.80
  -1  -5   6   15.19    0.87
  -1  -5   6   14.39    0.82
  -1  -5   6   14.14    0.85
   0   5  -6    1.86    0.29
   0   5  -6    1.68    0.36
   0  -5   6    1.10    0.27
   0  -5   6    1.52    0.28
   0  -5   6    1.90    0.31
  -1   5  -6   -0.36    0.12
  -1   5  -6    0.24    0.14
  -1   5  -6    0.32    0.08
  -1   5  -6    0.15    0.05
  -1   5  -6    0.18    0.05
   1  -5   6   -0.09    0.15
   1  -5   6    0.16    0.14
   1  -5   6    0.14    0.13
  -2   5  -6    0.08    0.10
  -2   5  -6    0.16    0.10
  -2   5  -6   -0.06    0.17
  -2   5  -6    0.17    0.11
   2  -5   6    0.04    0.11
   2  -5   6    0.05    0.16
   2  -5   6    0.08    0.11
  -3   5  -6    1.17    0.18
  -3   5  -6    1.06    0.21
  -3   5  -6    0.81    0.28
  -3   5  -6    0.95    0.21
   3  -5   6    1.17    0.29
   3  -5   6    1.01    0.18
  -4   5  -6    0.79    0.14
  -4   5  -6    0.82    0.28
   4  -5   6    0.72    0.16
   4  -5   6    1.38    0.24
   4  -5   6    0.60    0.25
   4  -5   6    0.96    0.16
  -5   5  -6    0.24    0.23
   5  -5   6    0.14    0.10
[truncated: 285,844 more chars]
